# Supplementary material for: Effects of salinity acclimation on histological characteristics and miRNA expression profiles of scales in juvenile rainbow trout (Oncorhynchus mykiss)
Source: BMC Genomics. 2022 Apr 12;23:300. doi: 10.1186/s12864-022-08531-7 (PMC9006599; doi:10.1186/s12864-022-08531-7)
Supplement: Supplementary file 3 — Additional file 3: Table S3. Detailed information for miRNA family identification. [file 12864_2022_8531_MOESM3_ESM.xlsx]

## Sheet: miRNA family
AC	ID	MI
MIPF0000001	mir-17	rno-miR-106b-3p_R-1,dre-miR-18b-3p_L+1R-1,dre-miR-93_R+2,bta-miR-93_R+1,ssa-miR-106a-5p,ssa-miR-106a-3p,ssa-miR-106b-3p_R-1_1ss3TC,ssa-miR-17-3-3p,ssa-miR-17-3p_R-1,ssa-miR-17-5p,ssa-miR-18a-3p_L+1R-3,ssa-miR-18b-5p_R+1,ssa-miR-18b-3p_L+2R-4,ssa-miR-20a-5p,ssa-miR-20a-2-3p_L-1,ssa-miR-20a-3-3p,ssa-miR-20b-5p_R+1,ssa-miR-93a-3p,ssa-miR-93a-5p,ssa-miR-93a-2-3p
MIPF0000002	let-7	rno-let-7d-3p,rno-let-7b-3p_1ss10CT,rno-let-7c-5p_R+2,rno-let-7i-3p_1ss9GA,gga-let-7a-2-3p_1ss8AG,gga-let-7a-2-3p_R+1_1ss3GA,dre-let-7c-5p,dre-let-7c-3p,dre-let-7d-5p_L+1,dre-let-7h_1ss17GA,dre-let-7h-p3,dre-let-7h-p3_1ss22AC,bta-miR-98,bta-let-7d_R-1,bta-let-7d,bta-let-7a-5p_L+2,bta-let-7e_R+1,bta-let-7e,ola-let-7a,ola-let-7a-3p_R+1,ola-let-7b_R+1,ipu-let-7a,ipu-let-7d,ipu-let-7d-1-p3,ipu-let-7h…
MIPF0000005	mir-30	rno-miR-30d-3p_1ss12AG,dre-miR-30a-5p_R-2,dre-miR-30b_L+1,dre-miR-30c-5p_R+2_1ss21AG,dre-miR-30c-3p_R+1,dre-miR-30c-3p_2ss13-C21GA,dre-miR-30d_L+1,dre-miR-30d_L+1R-2,dre-miR-30d_L+1_1ss23GT,dre-miR-30e-3p,ssc-miR-30a-3p_R+1,ssc-miR-30a-3p_R+2,ssa-miR-30a-4-3p,ssa-miR-30a-5p,ssa-miR-30a-3p,ssa-miR-30b-5p_R-1,ssa-miR-30b-3p_L-1,ssa-miR-30c-5p,ssa-miR-30c-3p,ssa-miR-30d-5p,ssa-miR-30d-2-3p_R-1_1ss1T…
MIPF0000006	mir-15	dre-miR-15a-5p_R+1,dre-miR-15b-3p_L+1_1ss3GA,tni-miR-16_R-1_1ss17TC,tni-mir-16-p3_1ss9TA,bta-miR-15b,gga-miR-16c-5p,gga-miR-16c-5p_1ss22GA,aca-miR-15a-5p_R+2_1ss10AG,aca-miR-16b-5p_R-2,ssa-miR-15a-5p_L-2_1ss18GA,ssa-miR-15a-3p_L-1,ssa-miR-15b-5p_R+1,ssa-miR-15b-3p,ssa-miR-15d-5p_R+1,ssa-miR-15d-3p_R-2,ssa-miR-16a-3p_L+1R-1_1ss11TC,ssa-miR-16a-5p,ssa-mir-16a-2-p3,ssa-miR-16b-3p,ssa-miR-16c-5p,ssa-…
MIPF0000007	mir-181	gga-miR-181b-1-3p_L+1R-1_1ss4AG,dre-miR-181b-5p_R+1,tni-miR-181a-5p,tni-miR-181a-3p,dre-miR-181a-2-3p,aca-miR-181a_R+3,ola-miR-181b-5p_R-1,ssa-miR-181a-5p,ssa-miR-181a-1-3p,ssa-miR-181a-3-3p_L+2_1ss15GA,ssa-miR-181a-5-3p,ssa-miR-181c-5p_R+1,ssa-miR-181c-3p_L+1
MIPF0000009	mir-29	tni-mir-29b-2-p5_1ss10AC,bta-miR-29a_L-1R-1,bta-miR-29a_L-1,ipu-miR-29a_R+2,ssa-miR-29a-5p,ssa-miR-29b-2-5p_L-2,ssa-miR-29b-3p,ssa-miR-29a-3p_R+2_1ss18AG
MIPF0000011	mir-19	dre-miR-19c-3p_R-1,ssa-miR-19a-3p_R+1,ssa-miR-19c-5p_1ss21CT,ssa-miR-19c-3p
MIPF0000013	mir-25	rno-miR-92a-3p_R+2,dre-miR-25-5p_R-1_2ss18GA19CT,dre-miR-92a-3p_R+1_2,dre-mir-92a-1-p3,dre-miR-92a-5p_2ss5TG12GA,dre-miR-92a-3p_R+1_1,dre-miR-92b-3p_R+1,ola-miR-92a_R+3,ssa-miR-25-5p_R-1,ssa-miR-25-3p,ssa-miR-92a-5p_1ss9AC,ssa-miR-92a-3p,ssa-miR-92a-4-5p,ssa-miR-92b-3p
MIPF0000014	mir-9	dre-miR-9-5p_R-1,ola-miR-9b-5p_R-1,ssa-miR-9a-5p_R-1
MIPF0000018	mir-154	ppy-miR-409-3p
MIPF0000019	mir-8	rno-miR-200b-3p_R+1_1ss23CT,dre-miR-429a,dre-miR-141-3p,bta-miR-200c,mdo-miR-429_R+3,ppy-miR-429,aca-miR-200b-3p_R+3,ssa-miR-200a-3p,ssa-miR-200a-3-5p,ssa-miR-200b-5p,ssa-miR-200b-3p_R-1
MIPF0000021	mir-124	dre-miR-124-5p,tni-mir-124-1-p5,fru-mir-124-2-p5,mdo-miR-124a-5p_L+1
MIPF0000022	mir-7	tni-miR-7,ssa-miR-7a-5p,ssa-miR-7a-3-3p
MIPF0000024	mir-103	dre-miR-107a-5p_1ss19TC
MIPF0000026	mir-218	dre-miR-218a,ssa-miR-218-3p_L-1,ssa-miR-218-5p
MIPF0000027	mir-23	rno-miR-23a-3p_R+4,dre-miR-23a-3-5p,dre-miR-23a-3p,ssc-miR-23a_R+4,tni-miR-23b,ssa-miR-23a-4-5p,ssa-miR-23a-5p_R-1,ssa-miR-23a-3p_R+1,ssa-miR-23b-5p_R+1
MIPF0000028	mir-135	dre-miR-135c_R+1
MIPF0000029	mir-133	gga-miR-133c-3p_R+1,dre-miR-133a-2-5p_R+1,ssc-miR-133b,ssc-miR-133b_L-1_2ss22AG23TC,ssa-miR-133a-5p_R+1,ssa-miR-133b-3p_L-1R+2
MIPF0000031	mir-196	dre-miR-196a-5p,dre-miR-196b,tni-miR-196a,dre-miR-196d,dre-miR-196d_R+1,ssa-miR-196a-5p,ssa-miR-196a-2-3p,ssa-miR-196a-3-3p,ssa-miR-196b-5p,ssa-miR-196b-3p_L+1R-1
MIPF0000033	mir-10	gga-miR-99a-5p_R+1,dre-miR-10b-5p_R-1,dre-miR-10c-5p,dre-miR-99_R+1,dre-miR-99,dre-miR-100-2-3p,dre-miR-125a_R+2,dre-mir-125a-2-p3_1ss22CA,dre-mir-125a-2-p3_1ss23CT,dre-miR-125b-5p_R+1,dre-miR-125b-5p_L+1R-1,dre-miR-125b-2-3p_L+1R+1,dre-miR-125c-5p_R+1_1ss18CT,tni-miR-125b,bta-miR-125b_R+1_1ss5TG,bta-miR-10a_L-1R+1,bta-miR-99b,aca-miR-99b-5p_R-1,ola-miR-100_R+4_1ss16AT,ccr-miR-99_R+2_1ss9GT,ssa-m…
MIPF0000034	mir-130	hsa-miR-130b-5p_R+2,dre-miR-130a_1ss21AT,dre-mir-301a-p5,dre-miR-301b-5p_R+1,dre-miR-301c-5p_R+1_2ss4CT9GA,ola-miR-301a-5p_R+1,ipu-miR-130c_R+3,ssa-miR-130a-5p,ssa-miR-130a-3p,ssa-miR-130b-5p,ssa-miR-130b-3p_1ss21AT,ssa-miR-130b-2-5p_L-1,ssa-miR-130d-3p_R-1,ssa-miR-130d-3-5p_R-1_1ss16CT,ssa-miR-301c-5p
MIPF0000036	mir-27	dre-miR-27b-5p_R-1,dre-miR-27b-3p_R-1,dre-miR-27d_R-1_1ss21CT,dre-miR-27e_R+1_1ss22GT,bta-miR-27a-3p_R+1,bta-miR-27a-3p_R+2,ola-miR-27c-5p_R+1_1ss11CA,ola-miR-27c-3p_R+2,ola-miR-27d-3p_R+4,ssa-miR-27a-5p,ssa-miR-27a-3p_R-1,ssa-miR-27c-3p
MIPF0000038	mir-1	rno-miR-206-3p_R+3,dre-miR-1,dre-miR-206-3p_R+1
MIPF0000040	mir-199	mmu-miR-199a-3p_L+1R+1,tni-miR-199_1ss11AG,tni-mir-199-3-p3,tni-miR-199_2ss10CT17CT,bta-miR-199b,bta-miR-199a-3p_L-1R+1_1ss22AT,ssc-miR-199a-5p,ssc-miR-199a-3p,aca-miR-199b-5p_R+1,ola-miR-199a-5p_R+2,ola-miR-199a-3p_R+1,ola-miR-199a-3p_R+1_1ss22AT
MIPF0000041	mir-24	dre-miR-24_R+2,ipu-miR-24_1ss23GT,ssa-miR-24a-4-5p,ssa-miR-24a-5p_L+1,ssa-miR-24a-3p_R+3,ssa-miR-24a-3-5p,ssa-miR-24b-3p
MIPF0000042	mir-204	rno-miR-204-5p_L+2,dre-miR-204-5p_R+2,tni-miR-204b_R+2_1ss11TC,bta-miR-204_L+2,ssa-miR-204-5p
MIPF0000043	mir-26	rno-miR-26a-5p_L+2,dre-miR-26b_L+1R-1,ola-miR-26_L+2R+1,ssa-miR-26a-5p,ssa-miR-26a-3p_1ss9CT,ssa-miR-26a-3-3p,ssa-miR-26a-4-3p,ssa-miR-26d-3p,ssa-miR-26b-3p,tch-miR-26a-2-5p_L+1_1ss11CT
MIPF0000046	mir-101	dre-miR-101a,bta-miR-101_R+2,ssa-miR-101a-5p_R-1,ssa-miR-101b-5p,ssa-miR-101b-3p_R+1
MIPF0000048	mir-128	ssa-miR-128-1-5p_R-2_1ss12CT,ssa-miR-128-3p,ssa-miR-128-3-5p
MIPF0000051	mir-221	ola-miR-222_R+6,gga-miR-222b-3p_R-1,ssa-miR-221-3p_R+3,ssa-miR-222a-5p_R-1,ssa-miR-222a-3p
MIPF0000053	mir-22	dre-miR-22a-5p_R-1,dre-miR-22b-5p,ola-miR-22_R+1,ola-miR-22_R+1_1ss21GC,ola-miR-22_R+2,ssa-miR-22b-5p_R+1,ssa-miR-22b-3p
MIPF0000054	mir-216	dre-miR-216b,ssa-miR-216b-5p_R+1,ssa-miR-216b-3p_L+1R-1
MIPF0000055	mir-194	bta-miR-194_R+2,ssa-miR-194a-5p,ssa-miR-194a-3p_R-1
MIPF0000056	mir-148	rno-miR-152-3p,dre-miR-152_2ss10GA22GT,bta-miR-148a_R-2,bta-miR-148a_R+1,bta-miR-148b_2ss9TC10CT,ssa-miR-148b-3p_R-1_1ss21AG,ssa-miR-152-5p_L-1,ssa-miR-152-3p,rno-miR-148a-3p_R+2
MIPF0000057	mir-28	rno-miR-28-3p,bta-miR-151-5p,bta-miR-151-3p
MIPF0000058	mir-205	mmu-miR-205-5p_R+4,ssa-miR-205b-1-3p_R+1,ssa-miR-205b-5p,ssa-miR-205b-2-3p,efu-miR-205_R+1_1ss23TA,ssa-miR-205a-3p,ssa-miR-205a-5p
MIPF0000059	mir-184	aca-miR-184-3p_R+1,ola-miR-184-3p_R+2
MIPF0000060	mir-21	dre-miR-21_1ss23CA,dre-miR-21_R+2,tni-miR-21,bta-miR-21-5p_1ss24TA,ola-miR-21_R+2_1ss16GA,ssa-miR-21a-3p,ssa-miR-21a-5p_R-3
MIPF0000061	mir-365	dre-miR-365,ipu-miR-365_R+3,ssa-miR-365-2-5p
MIPF0000062	mir-214	bta-miR-214_R+1_1ss22TA,bta-miR-214_R+1_1ss22TC,bta-miR-214_R+1,ola-miR-214_L-5R+6,ssa-miR-214-5p
MIPF0000063	mir-192	bta-miR-192_1ss23GT,ccr-miR-192_1ss1AC,ccr-mir-192-p3_1ss11CA,ccr-mir-192-p3,ssa-miR-192a-5p_R+1,ssa-miR-192b-5p
MIPF0000064	mir-31	aca-miR-31-5p_R+1
MIPF0000065	mir-132	dre-miR-212-5p,ssa-miR-132-5p,ssa-miR-132-3p,ssa-miR-212b-5p
MIPF0000067	mir-223	tni-miR-223_R+1,ola-miR-223_R+2
MIPF0000070	mir-33	ssa-mir-33a-2-p5_1ss16TG,ssa-miR-33b-3p
MIPF0000073	mir-129	ssa-miR-129-3p
MIPF0000075	mir-138	bta-miR-138_R+1,ssa-miR-138-5p
MIPF0000076	mir-190	bta-miR-190a_R+2
MIPF0000077	mir-217	dre-miR-217_R+1
MIPF0000078	mir-187	gga-miR-187-3p_R+3
MIPF0000079	mir-145	ssa-miR-145-3p_L+2R-1
MIPF0000080	mir-127	bta-miR-127
MIPF0000082	mir-193	dre-miR-193b-3p,bta-miR-193b_R-2,ssa-miR-193-5p_R+1_1ss11GT
MIPF0000084	mir-142	ssa-miR-142a-5p_R+1,ssa-miR-142b-3p_R-2,ssa-miR-142b-5p_R-3
MIPF0000085	mir-140	ola-miR-140-5p,ola-miR-140-3p_R+2,ccr-miR-140-3p_L-2R+2
MIPF0000086	mir-210	rno-miR-210-3p_R+1_1ss21GT,mdo-miR-210-3p_L-1R+2,mdo-miR-210-3p_L-1R+3,ccr-mir-210-p5_1ss17CT,ccr-miR-210_R+2
MIPF0000088	mir-224	bta-miR-224_R-1
MIPF0000093	mir-144	tni-miR-144
MIPF0000094	mir-143	ssa-miR-143-5p_R-1
MIPF0000097	mir-338	ssa-miR-338a-3-5p,ssa-miR-338a-5p,ssa-miR-338a-3p_R-1,ssa-miR-338a-4-5p
MIPF0000103	mir-146	dre-miR-146a_L+1,dre-miR-146b_L+1_1ss23GT,bta-miR-146b,ola-miR-146a-5p_L+2R-2,ssa-miR-146a-5p,ssa-miR-146a-3p_R-1,ssa-miR-146d-3p,ssa-miR-146d-5p
MIPF0000108	mir-203	dre-miR-203a-3p_R+1_2,dre-miR-203a-3p_R+1_1ss21TC,dre-miR-203a-3p_R+1_1,ssa-miR-203a-3p,ssa-miR-203b-5p,ssa-miR-203b-3p_L+1
MIPF0000109	mir-186	bta-miR-186_R+1
MIPF0000111	mir-489	ssa-miR-489-5p
MIPF0000113	mir-188	ppy-miR-532-3p
MIPF0000114	mir-375	dre-miR-375_1ss21TG,dre-miR-375_R+1,bta-miR-375_L-1_1ss23AT,ssa-miR-375-2-5p_R+1,ssa-miR-375-3p,ssa-miR-375-3-5p_R+1
MIPF0000115	mir-126	ssa-miR-126-5p,ssa-miR-126-3p
MIPF0000117	mir-139	dre-miR-139-5p_R+5,bta-miR-139_R-1,bta-miR-139_R+1,ppy-miR-139-3p_L+1,ssa-miR-139-5p,ssa-miR-139-2-3p_1ss12TC
MIPF0000123	mir-197	bta-miR-197
MIPF0000129	mir-455	dre-miR-455-2-5p,dre-miR-455-3p_L-2_1ss11TC,ssa-miR-455-5p,ssa-miR-455-3p_L+1R-1
MIPF0000134	mir-460	dre-miR-730_L+1R-2,dre-mir-730-p3_1ss23CT,gga-miR-460a-5p_R-1,ssa-miR-460-5p,ssa-miR-460-3p,ssa-miR-730a-5p,ssa-miR-730a-3p
MIPF0000148	mir-451	dre-miR-451_R+2,bta-miR-451_R+3
MIPF0000157	mir-155	dre-miR-155_R+3,ssa-miR-155-5p,ssa-miR-155-3p_1ss13AC
MIPF0000163	mir-320	bta-miR-320a
MIPF0000167	mir-370	bta-miR-370
MIPF0000168	mir-378	rno-miR-378a-5p,bta-miR-378
MIPF0000172	mir-361	bta-miR-361,ppy-miR-361-3p_R-1
MIPF0000173	mir-499	bta-miR-499_R+2,ssa-miR-499a-5p,ssa-miR-499b-5p_R-1
MIPF0000174	mir-454	ssa-miR-454-5p
MIPF0000179	mir-458	dre-miR-458-3p
MIPF0000193	mir-339	bta-miR-339b
MIPF0000194	mir-191	bta-miR-191
MIPF0000197	mir-150	ipu-miR-150_R+1
MIPF0000202	mir-185	bta-miR-185
MIPF0000203	mir-328	bta-miR-328
MIPF0000208	mir-466	mmu-mir-466k-p5
MIPF0000219	mir-484	bta-miR-484
MIPF0000220	mir-486	rno-miR-486
MIPF0000231	mir-497	bta-miR-497_R-1
MIPF0000242	mir-425	bta-miR-425-5p_L+1R+2
MIPF0000244	mir-351	rno-miR-351-5p_1ss25AT
MIPF0000274	mir-149	bta-miR-149-5p_R-1
MIPF0000329	mir-423	bta-miR-423-5p,bta-miR-423-3p_L-1
MIPF0000333	mir-652	bta-miR-652_R+1
MIPF0000341	mir-456	gga-miR-456-3p_R+1,aca-miR-456_R+2
MIPF0000360	mir-551	ccr-miR-551_R+1
MIPF0000392	mir-877	bta-mir-877-p5_1ss8CA
MIPF0000419	mir-574	ssc-miR-574-3p,ssc-miR-574-3p_R-1
MIPF0000431	mir-744	bta-miR-744_R-1
MIPF0000531	mir-1306	dre-mir-1306-p3
MIPF0000533	mir-584	ppy-miR-584_R-1
MIPF0000579	mir-1273	ssc-mir-1285-p5_1ss23CA,ssc-mir-1285-p5_1ss2AC,ssc-mir-1285-p3_1ss2AC
MIPF0000792	mir-1788	ssa-miR-1788-5p_R+2
MIPF0000805	mir-1388	ssa-miR-1338-3p
MIPF0000812	mir-2188	dre-miR-2188-3p_L+1_2ss13TC14AG
MIPF0000872	mir-2904	bta-mir-2904-2-p5_1ss9TC
MIPF0001020	mir-1260a	ppy-miR-1260a_R+2_1ss9TG,ppy-mir-1260a-p5_1ss8TG,ppy-miR-1260a_R+3_1ss9TG,ppy-miR-1260a_L+1_1ss10TG,ppy-miR-1260a_1ss13CT,ppy-mir-1260a-p3_1ss8TG,ppy-miR-1260a_1ss9TG
MIPF0001102	mir-3150	hsa-miR-3150b-5p_L-4_1ss9AC
MIPF0001103	mir-3074	hsa-miR-3074-5p_R+1,hsa-miR-3074-5p
MIPF0001194	mir-3596	rno-mir-3596a-p5
MIPF0001307	mir-729	dre-miR-729_R-2_1ss1CT
MIPF0001355	mir-725	ssa-miR-725-5p,ssa-miR-725-3p
MIPF0001371	mir-727	dre-miR-727-5p,ssa-miR-727-3p_R+2
MIPF0001381	mir-1260b	ptr-mir-1260b-p5_1ss8AG,ptr-miR-1260b_1ss9AG
MIPF0001616	mir-724	dre-miR-724_L-1,ssa-miR-724-5p_L-1
MIPF0001670	mir-728	ipu-miR-728
MIPF0001705	mir-7147	dre-miR-7147
MIPF0001751	mir-3535	mmu-mir-3535-p3_1ss1AC_2,mmu-mir-3535-p5_1ss1AC,mmu-mir-3535-p3_1ss1AC_1
MIPF0001755	mir-462	dre-miR-462_L+1,dre-miR-462_R+3
MIPF0002063	mir-3533	bta-mir-3533-p3_1ss14AT
MIPF0002098	mir-7132	ssa-miR-7132a-5p
