# Supplementary material for: Effects of salinity acclimation on histological characteristics and miRNA expression profiles of scales in juvenile rainbow trout (Oncorhynchus mykiss)
Source: BMC Genomics. 2022 Apr 12;23:300. doi: 10.1186/s12864-022-08531-7 (PMC9006599; doi:10.1186/s12864-022-08531-7)
Supplement: Supplementary file 4 — Additional file 4: Table S4. Detailed information for differentially expressed (DE) miRNAs (|log2FC| > 1 and p < 0.05). [file 12864_2022_8531_MOESM4_ESM.xlsx]

## Sheet: Cluster 10
Gene Table for Profile 10 (0.0,-1.0,1.0,0.0)
Num. Genes Expected	Num. Genes Assigned	P-Value	Significant
22	9.75	0.000466311	(significant)
-------
Selected	Weight	miR_name	ID	CG_3(norm)	SW_7d_3(norm)	SW_14d_3(norm)	SW_21d_3(norm)
	1	GMO-MIR-18A-2-5P_R+2	53	0	-0.42	1.41	0.18
	1	TNI-MIR-21	69	0	-15489.7	5193.12	-3550.97
	1	GMO-MIR-30B-3P_2SS19TC20GA	121	0	-9.77	15.16	-2.37
	1	ONI-MIR-101A	138	0	-21.76	51.73	19.11
	1	GMO-MIR-143-3P	194	0	-4.18	6.86	3.42
	1	GMO-MIR-193A-5P	234	0	-30.52	79.25	19.6
	1	SSA-MIR-203A-3P	251	0	-660.47	1579.92	548.1
	1	SSA-MIR-203B-3P_L+1	254	0	-895.92	1121.09	-227.99
	1	SSA-MIR-205B-2-3P	259	0	-5.16	3.45	-2.44
	1	SSA-MIR-338A-3-5P	293	0	-2.38	1.01	-0.77
	1	SSA-MIR-375-3P	298	0	-846.87	441.41	-310.17
	1	SSA-MIR-460-5P	309	0	-174.43	221.35	65.96
	1	SSA-MIR-1338-3P	334	0	-43.01	57.6	24.73
	1	ONI-MIR-7132A-5P_1SS10AT	339	0	-257.15	483.68	36.32
	1	DRE-MIR-203A-3P_R+1_2	443	0	-213.28	323.36	-58.76
	1	DRE-MIR-203A-3P_R+1_1	445	0	-213.28	323.36	-58.76
	1	SSA-MIR-449B-3P_L+1_1SS12TC	460	0	-3.64	2.6	0.3
	1	GMO-MIR-7550-5P_R+1_1SS1CA	584	0	-2.06	4.14	0.72
	1	MMU-MIR-205-5P_R+4	697	0	-24.28	54.61	0.41
	1	PC-5P-49545_77	792	0	-0.73	0.61	-0.31
	1	PC-3P-53805_58	828	0	-3.2	4.05	1.49
	1	PC-3P-13453_891	928	0	-29.67	47.92	-5.09

## Sheet: Cluster 11
Gene Table for Profile 11 (0.0,-1.0,1.0,1.0)
Num. Genes Expected	Num. Genes Assigned	P-Value	Significant
37	15.417	1.70017e-06	(significant)
-------
Selected	Weight	miR_name	ID	CG_3(norm)	SW_7d_3(norm)	SW_14d_3(norm)	SW_21d_3(norm)
	1	GGA-LET-7A-2-3P_1SS8AG	10	0	-0.78	1.95	3.09
	1	SSA-MIR-15D-3P_R-2	39	0	-9.43	15.69	18.73
	1	GMO-MIR-18A-3P_R+1_1SS15CT	54	0	-1.23	0.54	0.48
	1	DRE-MIR-18B-3P_L+1R-1	58	0	-3.63	5.37	3.27
	1	ONI-MIR-22C	76	0	-2.7	11.49	16.41
	1	SSA-MIR-29B-3P	104	0	-4.86	3.91	2.02
	1	SSA-MIR-30A-4-3P	120	0	-1.67	1.48	2.39
	1	SSA-MIR-92A-3P	128	0	-1841.2	10742.9	13912.2
	1	SSA-MIR-101B-3P_R+1	140	0	-3.89	16.22	14.09
	1	SSA-MIR-106A-5P	143	0	-7.86	15.23	12.18
	1	SSA-MIR-128-3P	158	0	-145.83	314.6	429.28
	1	SSA-MIR-130A-3P	164	0	-5.13	26.78	37.14
	1	SSA-MIR-130D-3P_R-1	166	0	-1.93	4.19	5.12
	1	GMO-MIR-143-5P_R-2	193	0	-3.28	3.16	4.83
	1	SSA-MIR-152-3P	209	0	-142.08	206.33	208.45
	1	DRE-MIR-204-3-3P_2SS10GA19GT	256	0	-29.87	125.47	188.44
	1	SSA-MIR-205A-5P	260	0	-276.26	1272.76	1154.55
	1	SSA-MIR-205A-3P	261	0	-39.71	19.78	34.68
	1	ONI-MIR-222_R-2	283	0	-58.12	7.37	34.37
	1	ONI-MIR-456_1SS22AT	307	0	-152.53	115.11	216.71
	1	DRE-MIR-15A-5P_R+1	354	0	-0.28	2.82	2.67
	1	TNI-MIR-16_R-1_1SS17TC	358	0	-6.99	4.37	6.42
	1	HHI-MIR-7792-P3	601	0	0	5.19	5.36
	1	PAL-MIR-9226-5P	610	0	-2.28	5.34	5.08
	1	PAL-MIR-9993B-3P	623	0	-5.26	60.84	72.46
	1	OLA-MIR-92A_R+3	659	0	-62.92	187.66	272.98
	1	RNO-MIR-92A-3P_R+2	661	0	-7.94	45.71	48.33
	1	DRE-MIR-196D_R+1	688	0	-1.75	0.86	0.89
	1	EFU-MIR-205_R+1_1SS23TA	696	0	-35.89	137.98	102.65
	1	ACA-MIR-456_R+2	719	0	-2.28	12.92	15.85
	1	PPY-MIR-1260A_1SS9TG	732	0	-72.01	604.19	637.71
	1	PAL-MIR-9993B-3P_1SS1AT	743	0	-4.36	22.68	33.59
	1	PC-3P-47407_89	825	0	-1.73	2.45	2.1
	1	PC-5P-7774_1426	839	0	-13.87	83.12	71.93
	1	PC-5P-31429_268	866	0	-3.47	15.45	13.4
	1	PC-5P-4257_2220	930	0	-22.82	127.43	118.47
	1	PC-3P-1441_6173	1065	0	-57.08	38	69.76

## Sheet: Cluster 17
Gene Table for Profile 17 (0.0,0.0,2.0,1.0)
Num. Genes Expected	Num. Genes Assigned	P-Value	Significant
91	30.792	1.61522e-19	(significant)
-------
Selected	Weight	miR_name	ID	CG_3(norm)	SW_7d_3(norm)	SW_14d_3(norm)	SW_21d_3(norm)
	1	ONI-LET-7B	2	0	777.73	3944.46	2718.14
	1	RNO-LET-7B-3P_1SS10CT	4	0	2.94	25.46	12.19
	1	OLA-LET-7A	5	0	400.53	1538.09	877.09
	1	SSA-LET-7J-5P_1SS16GA	25	0	-1.15	22.83	19.45
	1	GMO-MIR-10A-3P_L+2R-1	33	0	1.43	14.52	13.12
	1	SSA-MIR-15D-5P_R+1	38	0	5.56	35.79	29.67
	1	SSA-MIR-15B-5P_R+1	40	0	-49.36	360.74	232.2
	1	ONI-MIR-19D_1SS13TA	60	0	2.91	147.88	126.08
	1	SSA-MIR-19C-3P	62	0	-1.96	13.68	5.97
	1	SSA-MIR-20A-5P	65	0	-3.85	39.71	23.67
	1	SSA-MIR-23B-5P_R+1	79	0	-11.69	40.75	17.13
	1	DRE-MIR-23A-3-5P	82	0	-1.33	19.29	15.67
	1	IPU-MIR-29A_R+2	105	0	0	2.95	2.16
	1	SSA-MIR-30B-3P_L-1	114	0	-1.6	11.62	8.55
	1	ONI-MIR-125A	148	0	-155.17	3914.82	1828.26
	1	ONI-MIR-125B	150	0	1594.44	5513.62	4590.13
	1	SSA-MIR-130D-3-5P_R-1_1SS16CT	165	0	0.13	7.15	4.69
	1	IPU-MIR-130C_R+3	170	0	0	4.27	1.98
	1	SSA-MIR-181A-5-3P	218	0	56.57	184.79	138.9
	1	SSA-MIR-196A-5P	238	0	8.9	41.43	21.98
	1	SSA-MIR-196B-3P_L+1R-1	240	0	-0.85	2.98	1.5
	1	SSA-MIR-196A-3-3P	241	0	-1.5	17.21	15.52
	1	SSA-MIR-200A-3-5P	248	0	0	1.18	0.9
	1	ONI-MIR-205	257	0	-19528.9	177214	101305
	1	ONI-MIR-210_R+2	265	0	1.73	172.07	173.01
	1	SSA-MIR-218-3P_L-1	276	0	0.61	2.1	1.86
	1	SSA-MIR-455-3P_L+1R-1	306	0	612.78	3398.25	2889.3
	1	MMU-MIR-466K-P5	315	0	-5.52	42.4	12.34
	1	SSA-MIR-7132A-5P	341	0	-67.29	383.97	97.65
	1	SSA-MIR-8160-5P	344	0	0.93	3.79	2.96
	1	ONI-MIR-10545	350	0	6.04	23.99	13.49
	1	BTA-MIR-27A-3P_R+1	375	0	-0.05	3.71	2.12
	1	DRE-MIR-92A-3P_R+1_2	390	0	-58.44	1836.38	1614.22
	1	DRE-MIR-92A-3P_R+1_1	391	0	-58.44	1836.38	1614.22
	1	GMO-MIR-101A-3P	398	0	0	1.7	1.36
	1	CCR-MIR-140-3P_L-2R+2	413	0	0.5	4.43	1.82
	1	BTA-MIR-148A_R-2	420	0	0	5.5	1.74
	1	GMO-MIR-181A-5P_R+3	425	0	1.72	11.53	5.65
	1	GMO-MIR-205-5P_R+5	447	0	-76.03	794.57	333.01
	1	DRE-MIR-375_R+1	457	0	-1.64	20.83	9.07
	1	ONI-MIR-457	464	0	-285.94	2260.29	1250.05
	1	GMO-MIR-7132A-5P_1SS10AT	480	0	-8.5	30.34	12.52
	1	ONI-MIR-7550_L-1R+3	482	0	0	6.67	3.79
	1	GMO-MIR-7550-5P_L-1R+2_3	483	0	1.22	11.56	7.47
	1	MMU-MIR-21C_R-2_1SS19CA	490	0	0	1.86	1.44
	1	DRE-MIR-27C-3P_1SS9GT	492	0	0	8.64	7.67
	1	PPY-MIR-1260A_R+3_1SS9TG	517	0	0	1.72	0.87
	1	PTR-MIR-1260B_1SS9AG	519	0	0	14.68	8.38
	1	PPY-MIR-1260A_1SS13CT	520	0	0	8.78	6.75
	1	MMU-MIR-1983-P5_1SS22TC	524	0	0	9.77	4.4
	1	MMU-MIR-1983-P3	525	0	0.11	16.05	7.53
	1	BTA-MIR-2478-P5_1SS5AG	528	0	0	7.1	2.96
	1	RNO-MIR-3596A-P5	535	0	0	1.72	1.27
	1	BTA-MIR-4286_R+1	537	0	-6.34	112.65	104.38
	1	MMU-MIR-6239_R-2_1SS6TG	561	0	-11.67	327.18	192.86
	1	ONI-MIR-7550_L-1R+4	582	0	0	1.9	0.58
	1	GMO-MIR-7550-5P_L-1R+2_5	583	0	1.22	11.56	7.47
	1	ONI-MIR-7550_L-1R+1_1	585	0	0.51	7.78	5.06
	1	GMO-MIR-7550-5P_L-1R+2_2	586	0	1.22	11.56	7.47
	1	ONI-MIR-7550_L-1R+2_1	587	0	-1.33	9.24	7.47
	1	ONI-MIR-7550_L-1R+2_4	590	0	-1.33	9.24	7.47
	1	ONI-MIR-7550_L-1R+2_5	591	0	-1.33	9.24	7.47
	1	GMO-MIR-7550-5P_L-1R+2_1	592	0	1.22	11.56	7.47
	1	ONI-MIR-7550_L-1R+1_2	593	0	0.51	7.78	5.06
	1	ONI-MIR-7550_L-1R+2_2	595	0	-1.33	9.24	7.47
	1	ONI-MIR-7550_L-1R+2_3	597	0	-1.33	9.24	7.47
	1	GMO-MIR-7550-5P_L-1R+2_4	598	0	1.22	11.56	7.47
	1	CJA-MIR-9933_L-3_1SS12AT	622	0	-4.75	144.79	108.76
	1	RNO-MIR-28-3P	653	0	0	1.72	1.57
	1	DRE-MIR-462_R+3	721	0	1.42	7.63	3
	1	BTA-MIR-2478_L-2	733	0	-98.08	1184.84	1007.84
	1	HSA-MIR-4454_L-2_1SS8AG	736	0	-1.27	80.57	67.24
	1	ONI-MIR-7550	740	0	-9.08	306.77	283.59
	1	PC-5P-13833_868	758	0	6.68	47.61	33.77
	1	PC-5P-52276_64	766	0	0	3.22	1.3
	1	PC-5P-19105_604	778	0	4.38	17.89	15.98
	1	PC-3P-66939_25	779	0	0	2.16	1.16
	1	PC-5P-25706_391	786	0	-3.09	11.56	6.93
	1	PC-5P-47230_90	803	0	0.91	2.82	1.57
	1	PC-3P-67199_24	810	0	0	1.82	0.58
	1	PC-3P-1648_5299	814	0	1.13	94.03	55.9
	1	PC-3P-30642_282	834	0	-12.36	104.35	71.55
	1	PC-3P-74197_17	836	0	0	2.06	1.4
	1	PC-3P-84176_10	846	0	0	1.86	1.74
	1	PC-3P-47702_87	855	0	-0.2	6.25	2.71
	1	PC-5P-72956_18	890	0	0	1.18	0.9
	1	PC-5P-49472_77	914	0	1.42	6.09	2.99
	1	PC-3P-41768_130	932	0	-1.19	15.69	11.69
	1	PC-3P-21973_499	951	0	-3.09	65.45	17.51
	1	PC-5P-34950_209	952	0	-0.13	4.93	1.81
	1	PC-3P-75267_16	1054	0	0	2.61	1.62

## Sheet: Cluster 18
Gene Table for Profile 18 (0.0,1.0,-1.0,-1.0)
Num. Genes Expected	Num. Genes Assigned	P-Value	Significant
70	30.792	3.97303e-10	(significant)
-------
Selected	Weight	miR_name	ID	CG_3(norm)	SW_7d_3(norm)	SW_14d_3(norm)	SW_21d_3(norm)
	1	DRE-MIR-1	1	0	8.55	-25.66	-26.89
	1	OLA-LET-7A-3P_R+1	6	0	9.02	-4.29	-6.09
	1	ONI-LET-7I	16	0	69.13	-58.83	-48.23
	1	RNO-LET-7I-3P_1SS9GA	17	0	15.1	-27.45	-25.18
	1	ONI-LET-7E	18	0	234.33	-844.75	-937.56
	1	GMO-LET-7E-3P_1SS22CT	19	0	4.9	-3.4	-3.75
	1	SSA-LET-7D-5P	20	0	616.69	-1004.42	-1096.72
	1	SSA-MIR-10D-5P_L-1R+1	29	0	231.74	-346.26	-249.42
	1	ONI-MIR-10A	31	0	1191.71	-1542.94	-1033.61
	1	SSA-MIR-10A-3P	32	0	3.84	-2.36	-2.73
	1	DRE-MIR-22A-5P_R-1	73	0	150.34	-82.55	-78.05
	1	DRE-MIR-22B-5P	75	0	25.91	-95.21	-128.33
	1	SSA-MIR-26A-5P	92	0	396.06	-3269.34	-3660.54
	1	SSA-MIR-26A-3P_1SS9CT	94	0	1.12	-0.75	-0.75
	1	GMO-MIR-27B-5P_R-1	100	0	40.57	-32.73	-29.99
	1	ONI-MIR-27B	101	0	1069.89	-2275.19	-1854.04
	1	GMO-MIR-27D-5P_L+1R-2	103	0	23.4	-60.03	-57.24
	1	SSA-MIR-30D-5P	110	0	32.44	-38.13	-42.49
	1	ONI-MIR-30A	112	0	31.92	-25.21	-52.27
	1	ONI-MIR-99B	134	0	160.91	-1224.17	-1243.72
	1	SSA-MIR-100A-5P	135	0	5428.63	-15535.4	-13792.5
	1	DRE-MIR-100-2-3P	136	0	25.83	-12.24	-10.88
	1	SSA-MIR-101B-5P	139	0	21.56	-23.31	-45.68
	1	GMO-MIR-125B-3P_R+3	151	0	83.7	-82.88	-147.23
	1	ONI-MIR-129	160	0	0.28	-0.9	-1.23
	1	SSA-MIR-133A-5P_R+1	178	0	5.38	-17.64	-17.64
	1	SSA-MIR-133B-3P_L-1R+2	179	0	176.57	-148.19	-100.94
	1	ONI-MIR-143	195	0	94.56	-165.27	-148.01
	1	GMO-MIR-145-3P	199	0	15.3	-27.57	-30.38
	1	ONI-MIR-148-3P	205	0	67.68	-135.36	-153.24
	1	SSA-MIR-152-5P_L-1	208	0	17.62	-6.85	-14.62
	1	DRE-MIR-187_R+3	227	0	2.87	-7.24	-6.68
	1	ONI-MIR-199A_R+1	244	0	1465.41	-798.34	-966.04
	1	ONI-MIR-206	263	0	145.93	-148.65	-145.47
	1	GMO-MIR-222-5P_R+1_1SS10CG	282	0	1.89	-18.57	-16.98
	1	DRE-MIR-458-3P	308	0	22.79	-9.43	-16.87
	1	ONI-MIR-499_R-1	318	0	12	-13.56	-17.96
	1	SSA-MIR-8159-5P	343	0	0.47	-3.96	-4.94
	1	ONI-MIR-26A_R+2	368	0	13.6	-11.14	-21.93
	1	TCH-MIR-26A-2-5P_L+1_1SS11CT	370	0	4.42	-4.95	-4.98
	1	OLA-MIR-26_L+2R+1	371	0	2.92	-9.24	-9.24
	1	DRE-MIR-30C-3P_R+1	383	0	1.03	-2.83	-2.82
	1	DRE-MIR-93_R+2	392	0	0.75	-0.4	-1.02
	1	DRE-MIR-99_R+1	395	0	698.95	-699.57	-674.12
	1	DRE-MIR-125B-5P_L+1R-1	402	0	5.49	-4.47	-7.9
	1	SSC-MIR-133B	408	0	3.72	-3.1	-1.48
	1	DRE-MIR-204-5P_R+2	446	0	122.09	-82.94	-64.66
	1	DRE-MIR-206-3P_R+1	448	0	20.76	-24.47	-22.85
	1	RNO-MIR-30D-3P_1SS12AG	494	0	8.76	-32.95	-32.3
	1	GGA-MIR-99A-5P_R+1	497	0	33.61	-62.81	-81.79
	1	DRE-MIR-181A-5P_L+2	500	0	9.57	-20.02	-20.33
	1	ECA-MIR-8969-P3_1SS5AT	603	0	6.22	-4.54	-4.32
	1	BTA-MIR-11987_L-1_1SS8TA	633	0	38.95	-109.22	-105.22
	1	DRE-MIR-24_R+2	649	0	21.98	-7.72	-10.01
	1	CPO-MIR-92A-3P_L+2	660	0	4.88	-20.62	-20.62
	1	OLA-MIR-199A-3P_R+1_1SS22AT	692	0	115.1	-50.01	-68.37
	1	BTA-MIR-204_L+2	695	0	32.97	-28.27	-25.45
	1	BTA-LET-7A-5P_L+2	748	0	3.88	-4.93	-6.08
	1	PC-5P-43238_118	752	0	3.74	-4.04	-2.26
	1	PC-3P-67625_24	764	0	0.75	-2.29	-2.29
	1	PC-3P-66612_25	800	0	1.86	-0.88	-0.88
	1	PC-3P-46407_95	821	0	8.5	-13.58	-14.46
	1	PC-5P-26059_381	845	0	9.97	-5.64	-12.93
	1	PC-5P-76044_15	947	0	1.95	-1.25	-1.25
	1	PC-5P-66205_26	949	0	0.46	-2.92	-2.92
	1	PC-5P-79458_12	967	0	1.32	-1.42	-1.42
	1	PC-3P-65903_26	976	0	2.52	-2.86	-2.86
	1	PC-5P-76528_15	1030	0	0.78	-1.25	-1.25
	1	PC-5P-34648_213	1034	0	2.45	-22.77	-21.69
	1	PC-5P-30319_288	1058	0	3.28	-12.87	-18.44

## Sheet: Cluster 25
Gene Table for Profile 25 (0.0,1.0,2.0,3.0)
Num. Genes Expected	Num. Genes Assigned	P-Value	Significant
70	32.417	3.19409e-09	(significant)
-------
Selected	Weight	miR_name	ID	CG_3(norm)	SW_7d_3(norm)	SW_14d_3(norm)	SW_21d_3(norm)
	1	OGA-LET-7G-P3_1SS22CT	22	0	0	6.73	7.39
	1	SSA-MIR-15E-5P_R+1	34	0	5.54	10.05	29.04
	1	SSA-MIR-15E-3P_R-3	35	0	9.76	55.41	60.39
	1	SSA-MIR-15B-3P	41	0	0.69	3.55	4.04
	1	SSA-MIR-16A-3P_L+1R-1_1SS11TC	49	0	4.32	26.26	38.82
	1	SSA-MIR-17-5P	50	0	0.8	117.64	158.08
	1	SSA-MIR-17-3-3P	52	0	1.87	8.27	15.2
	1	SSA-MIR-20B-5P_R+1	67	0	18.01	43.02	48.5
	1	ONI-MIR-23B_R+1	80	0	676.71	834.28	976.14
	1	SSA-MIR-30B-5P_R-1	113	0	-138.85	4223.46	6847.78
	1	SSA-MIR-93A-3P	131	0	0	1.57	2.52
	1	SSA-MIR-93A-2-3P	132	0	5.89	20.63	30.57
	1	CPO-MIR-103-3P_R-2	142	0	0.76	7.9	9.7
	1	SSA-MIR-130B-5P	167	0	15.31	24.33	30.26
	1	SSA-MIR-130B-3P_1SS21AT	168	0	-0.81	12.52	16.43
	1	ONI-MIR-130B-3P_1SS9TC	169	0	11.03	167.13	247.22
	1	ONI-MIR-130A_R+1	171	0	-3.24	17.34	31.15
	1	DRE-MIR-130A_1SS21AT	173	0	1.35	42.85	58.57
	1	ONI-MIR-138	184	0	0.34	0.6	1.77
	1	GMO-MIR-181B-5P_R-1	212	0	1329.32	2485.57	2945.04
	1	SSA-MIR-181A-5P	214	0	1431.31	19822.4	19766.7
	1	DRE-MIR-193B-3P	233	0	275.06	3195.61	3303.16
	1	ONI-MIR-193_R-2	235	0	0	7.87	8.39
	1	GMO-MIR-199-5P_R+1	243	0	8099.38	9936.86	15544.2
	1	SSA-MIR-338A-4-5P	290	0	16.27	20.58	23.21
	1	GMO-MIR-375-5P_R+1_1SS11CA	300	0	0	1.97	3.53
	1	SSA-MIR-455-5P	305	0	1440.84	1499.79	2509.93
	1	SSA-MIR-730A-5P	326	0	3.45	7.12	13.52
	1	SSA-MIR-730A-3P	327	0	0	3.61	5.96
	1	DRE-MIR-7147	342	0	0	7.71	8.25
	1	GGA-MIR-132B-3P	407	0	2.69	17.5	26
	1	ONI-MIR-181B_R-1	426	0	78.66	109.98	153.86
	1	OLA-MIR-199A-5P_R+2	439	0	1	5.4	6.75
	1	DRE-MIR-455-2-5P	461	0	0	1.61	2.82
	1	GGA-MIR-460A-5P_R-1	465	0	0.61	1.35	2.11
	1	ONI-MIR-2184_R-1	474	0	1.02	2.75	2.91
	1	GGA-MIR-16C-5P_1SS22GA	488	0	0.58	0.81	3.09
	1	BTA-MIR-138_R+1	498	0	0.8	1.28	2.61
	1	PPY-MIR-1260A_R+2_1SS9TG	514	0	0	2.06	3.62
	1	MMU-MIR-2137_L-3_1SS16AG	526	0	0	7	7.46
	1	BTA-MIR-2478_1SS2TA	529	0	1.22	2.76	3.08
	1	MMU-MIR-6240_L-1R-7	562	0	0	3.87	4.82
	1	MMU-MIR-6240_L-1R-2_1SS22CA	567	0	5.97	26.93	60.94
	1	MMU-MIR-6240_L-2R-3_1SS22CA	569	0	-0.1	88.03	137.75
	1	MMU-MIR-6240_L-2R-2_1SS22CA	571	0	7.07	38.47	66.25
	1	MMU-MIR-6240_L-2R-6	574	0	-3.07	39.8	58.37
	1	PAL-MIR-9226-5P_1SS4AT	604	0	0	0.86	1.17
	1	PAL-MIR-9226-5P_1SS4AG	605	0	-0.22	10.59	11.98
	1	EFU-MIR-9226_L-4_1SS22GA	606	0	-3.56	23.52	44.36
	1	PAL-MIR-9226-P5_1SS18CT	608	0	0	3.68	4.71
	1	EFU-MIR-9341_L-1R+1	611	0	0	3.85	7.85
	1	EFU-MIR-9341_L+3R+1	613	0	0	5.28	8.69
	1	EFU-MIR-9341_L-2R+1	619	0	0	5.24	7.42
	1	ONI-MIR-10965_L-1_1SS3TA	626	0	0	11.19	20.48
	1	BTA-MIR-11980_R-2_1SS4CG	628	0	0.65	20.91	27.18
	1	BTA-MIR-151-5P	677	0	1.04	4.65	8.37
	1	BTA-MIR-151-3P	678	0	1.37	1.89	3.31
	1	RNO-MIR-152-3P	679	0	1.96	2.4	6.97
	1	HSA-MIR-7977_1SS6AG	741	0	-4.57	245.85	550.84
	1	PC-5P-26487_370	798	0	1.83	7.03	7.03
	1	PC-5P-54052_57	833	0	1.12	1.3	2.44
	1	PC-5P-51251_68	891	0	1.46	1.34	3.7
	1	PC-5P-29117_311	912	0	2.73	7.01	7.73
	1	PC-3P-57344_46	924	0	0	3.54	7.5
	1	PC-5P-56987_47	929	0	0	3.93	6.51
	1	PC-3P-68430_23	957	0	0	1.97	3.69
	1	PC-3P-74806_16	991	0	0	1.72	2.09
	1	PC-5P-61858_34	1005	0	0	1.97	2.6
	1	PC-3P-17439_675	1011	0	-4.05	50.88	69.83
	1	PC-3P-52841_61	1015	0	0	8.16	14.84
