# Supplementary material for: Effects of salinity acclimation on histological characteristics and miRNA expression profiles of scales in juvenile rainbow trout (Oncorhynchus mykiss)
Source: BMC Genomics. 2022 Apr 12;23:300. doi: 10.1186/s12864-022-08531-7 (PMC9006599; doi:10.1186/s12864-022-08531-7)
Supplement: Supplementary file 6 — Additional file 6: Table S6. Detailed information for the differentially enriched GO term analysis. [file 12864_2022_8531_MOESM6_ESM.xlsx]

## Sheet: Cluster 16
GO_term	Percent	Function	Count
protein phosphorylation	70.9534	Biological Process	64
phosphorylation	44.3459	Biological Process	40
transport	35.4767	Biological Process	32
regulation of transcription, DNA-templated	34.3681	Biological Process	31
protein dephosphorylation	24.3902	Biological Process	22
dephosphorylation	23.2816	Biological Process	21
signal transduction	22.1729	Biological Process	20
innate immune response	22.1729	Biological Process	20
heart development	19.9557	Biological Process	18
positive regulation of transcription by RNA polymerase II	19.9557	Biological Process	18
proteolysis	17.7384	Biological Process	16
multicellular organism development	17.7384	Biological Process	16
negative regulation of transcription by RNA polymerase II	17.7384	Biological Process	16
cell adhesion	16.6297	Biological Process	15
neuron differentiation	15.5211	Biological Process	14
axon extension	15.5211	Biological Process	14
transcription, DNA-templated	15.5211	Biological Process	14
regulation of transcription by RNA polymerase II	14.4124	Biological Process	13
cell fate commitment	14.4124	Biological Process	13
cell differentiation	14.4124	Biological Process	13
transmembrane receptor protein tyrosine kinase signaling pathway	13.3038	Biological Process	12
intracellular protein transport	13.3038	Biological Process	12
protein transport	12.1951	Biological Process	11
blood vessel development	12.1951	Biological Process	11
retina development in camera-type eye	12.1951	Biological Process	11
transcription by RNA polymerase II	12.1951	Biological Process	11
negative regulation of ossification	12.1951	Biological Process	11
Wnt signaling pathway	12.1951	Biological Process	11
positive regulation of gene expression	12.1951	Biological Process	11
negative regulation of gene expression	11.0865	Biological Process	10
ephrin receptor signaling pathway	11.0865	Biological Process	10
peptidyl-serine phosphorylation	11.0865	Biological Process	10
skeletal muscle tissue development	11.0865	Biological Process	10
B cell receptor signaling pathway	11.0865	Biological Process	10
metabolic process	11.0865	Biological Process	10
convergent extension involved in gastrulation	11.0865	Biological Process	10
cellular response to lipopolysaccharide	11.0865	Biological Process	10
dsRNA transport	11.0865	Biological Process	10
melanocyte differentiation	9.97783	Biological Process	9
cell division	9.97783	Biological Process	9
chondrocyte differentiation	9.97783	Biological Process	9
positive regulation of transcription, DNA-templated	9.97783	Biological Process	9
B cell proliferation	9.97783	Biological Process	9
negative regulation of transcription, DNA-templated	9.97783	Biological Process	9
neural crest cell migration	9.97783	Biological Process	9
osteoblast differentiation	9.97783	Biological Process	9
microtubule nucleation	9.97783	Biological Process	9
regulation of cell population proliferation	9.97783	Biological Process	9
intracellular signal transduction	9.97783	Biological Process	9
heart looping	9.97783	Biological Process	9
negative regulation of apoptotic process	9.97783	Biological Process	9
regulation of cell shape	9.97783	Biological Process	9
cellular response to drug	8.86918	Biological Process	8
cellular response to trichostatin A	8.86918	Biological Process	8
cellular response to calcium ion	8.86918	Biological Process	8
positive regulation of osteoblast differentiation	8.86918	Biological Process	8
neuron development	8.86918	Biological Process	8
positive regulation of myoblast differentiation	8.86918	Biological Process	8
B cell homeostasis	8.86918	Biological Process	8
positive regulation of skeletal muscle cell differentiation	8.86918	Biological Process	8
positive regulation of alkaline phosphatase activity	8.86918	Biological Process	8
glomerulus morphogenesis	8.86918	Biological Process	8
outflow tract morphogenesis	8.86918	Biological Process	8
primary heart field specification	8.86918	Biological Process	8
regulation of megakaryocyte differentiation	8.86918	Biological Process	8
learning or memory	8.86918	Biological Process	8
secondary heart field specification	8.86918	Biological Process	8
neural crest cell differentiation	8.86918	Biological Process	8
positive regulation of bone mineralization	8.86918	Biological Process	8
sinoatrial valve morphogenesis	8.86918	Biological Process	8
animal organ morphogenesis	8.86918	Biological Process	8
positive regulation of protein phosphorylation	8.86918	Biological Process	8
positive regulation of protein homodimerization activity	8.86918	Biological Process	8
positive regulation of behavioral fear response	8.86918	Biological Process	8
cellular response to parathyroid hormone stimulus	8.86918	Biological Process	8
ventricular cardiac muscle cell differentiation	8.86918	Biological Process	8
blood vessel remodeling	8.86918	Biological Process	8
humoral immune response	8.86918	Biological Process	8
positive regulation of B cell proliferation	8.86918	Biological Process	8
renal tubule morphogenesis	8.86918	Biological Process	8
cell cycle	8.86918	Biological Process	8
oxidation-reduction process	8.86918	Biological Process	8
cellular response to transforming growth factor beta stimulus	8.86918	Biological Process	8
regulation of synaptic activity	8.86918	Biological Process	8
positive regulation of cardiac muscle cell differentiation	8.86918	Biological Process	8
smooth muscle cell differentiation	8.86918	Biological Process	8
regulation of germinal center formation	8.86918	Biological Process	8
positive regulation of skeletal muscle tissue development	8.86918	Biological Process	8
endochondral ossification	8.86918	Biological Process	8
positive regulation of cardiac muscle cell proliferation	8.86918	Biological Process	8
negative regulation of neuron apoptotic process	8.86918	Biological Process	8
cardiac ventricle formation	8.86918	Biological Process	8
platelet formation	8.86918	Biological Process	8
positive regulation of neuron differentiation	8.86918	Biological Process	8
muscle cell fate determination	8.86918	Biological Process	8
germinal center formation	8.86918	Biological Process	8
cardiocyte differentiation	8.86918	Biological Process	8
epithelial cell proliferation involved in renal tubule morphogenesis	8.86918	Biological Process	8
inflammatory response	8.86918	Biological Process	8
MAPK cascade	8.86918	Biological Process	8
nephron tubule epithelial cell differentiation	8.86918	Biological Process	8
cellular response to fluid shear stress	8.86918	Biological Process	8
positive regulation of macrophage apoptotic process	8.86918	Biological Process	8
peptidyl-tyrosine dephosphorylation	8.86918	Biological Process	8
protein localization to centrosome	8.86918	Biological Process	8
anatomical structure formation involved in morphogenesis	7.76053	Biological Process	7
epidermal growth factor receptor signaling pathway	7.76053	Biological Process	7
cytokine-mediated signaling pathway	7.76053	Biological Process	7
semaphorin-plexin signaling pathway	7.76053	Biological Process	7
circadian regulation of gene expression	7.76053	Biological Process	7
positive regulation of cell migration	7.76053	Biological Process	7
tissue development	7.76053	Biological Process	7
small GTPase mediated signal transduction	7.76053	Biological Process	7
cartilage development	7.76053	Biological Process	7
digestive tract development	7.76053	Biological Process	7
pectoral fin development	7.76053	Biological Process	7
transmembrane transport	7.76053	Biological Process	7
regulation of apoptotic process	7.76053	Biological Process	7
cell development	7.76053	Biological Process	7
rhythmic process	6.65188	Biological Process	6
regulation of gene expression	6.65188	Biological Process	6
hemopoiesis	6.65188	Biological Process	6
regulation of microtubule polymerization	6.65188	Biological Process	6
negative regulation of axon extension involved in axon guidance	6.65188	Biological Process	6
proteoglycan biosynthetic process	6.65188	Biological Process	6
vesicle-mediated transport	6.65188	Biological Process	6
translation	6.65188	Biological Process	6
purine ribonucleoside monophosphate biosynthetic process	6.65188	Biological Process	6
positive regulation of peptidyl-threonine phosphorylation	6.65188	Biological Process	6
positive regulation of proteasomal ubiquitin-dependent protein catabolic process	6.65188	Biological Process	6
IMP salvage	6.65188	Biological Process	6
negative chemotaxis	6.65188	Biological Process	6
negative regulation of receptor signaling pathway via JAK-STAT	6.65188	Biological Process	6
Golgi organization	5.54324	Biological Process	5
heart valve development	5.54324	Biological Process	5
positive regulation of Wnt signaling pathway	5.54324	Biological Process	5
liver development	5.54324	Biological Process	5
developmental process	5.54324	Biological Process	5
inositol phosphate dephosphorylation	5.54324	Biological Process	5
endocytosis	5.54324	Biological Process	5
embryonic pectoral fin morphogenesis	5.54324	Biological Process	5
determination of left/right symmetry	5.54324	Biological Process	5
carbohydrate metabolic process	5.54324	Biological Process	5
positive regulation of canonical Wnt signaling pathway	5.54324	Biological Process	5
DNA methylation	5.54324	Biological Process	5
positive regulation of cell population proliferation	5.54324	Biological Process	5
macrophage differentiation	5.54324	Biological Process	5
protein localization to Golgi apparatus	5.54324	Biological Process	5
positive regulation of non-canonical Wnt signaling pathway	5.54324	Biological Process	5
extrinsic apoptotic signaling pathway via death domain receptors	5.54324	Biological Process	5
chemical synaptic transmission	5.54324	Biological Process	5
regulation of circadian rhythm	5.54324	Biological Process	5
homophilic cell adhesion via plasma membrane adhesion molecules	5.54324	Biological Process	5
chordate embryonic development	5.54324	Biological Process	5
positive regulation of apoptotic process	5.54324	Biological Process	5
protein neddylation	5.54324	Biological Process	5
translational elongation	5.54324	Biological Process	5
cytoplasmic microtubule organization	5.54324	Biological Process	5
immune response	5.54324	Biological Process	5
protein localization to cilium	5.54324	Biological Process	5
positive regulation of ubiquitin-protein transferase activity	5.54324	Biological Process	5
inner ear development	5.54324	Biological Process	5
regulation of protein kinase activity	5.54324	Biological Process	5
positive regulation of I-kappaB kinase/NF-kappaB signaling	5.54324	Biological Process	5
protein autophosphorylation	5.54324	Biological Process	5
positive regulation of ERK1 and ERK2 cascade	5.54324	Biological Process	5
spindle assembly	5.54324	Biological Process	5
positive regulation of peptidyl-tyrosine phosphorylation	5.54324	Biological Process	5
I-kappaB kinase/NF-kappaB signaling	5.54324	Biological Process	5
negative regulation of cell population proliferation	5.54324	Biological Process	5
negative regulation of actin filament depolymerization	4.43459	Biological Process	4
activation of MAPK activity	4.43459	Biological Process	4
nucleoside transport	4.43459	Biological Process	4
regulation of Arp2/3 complex-mediated actin nucleation	4.43459	Biological Process	4
protein polyubiquitination	4.43459	Biological Process	4
JNK cascade	4.43459	Biological Process	4
adiponectin-activated signaling pathway	4.43459	Biological Process	4
neurotransmitter transport	4.43459	Biological Process	4
positive regulation of protein ubiquitination	4.43459	Biological Process	4
negative regulation of cell motility	4.43459	Biological Process	4
epithelial to mesenchymal transition	4.43459	Biological Process	4
visual perception	4.43459	Biological Process	4
anterior/posterior pattern specification	4.43459	Biological Process	4
vesicle targeting, trans-Golgi to endosome	4.43459	Biological Process	4
nervous system development	4.43459	Biological Process	4
heart morphogenesis	4.43459	Biological Process	4
regulation of cell cycle	4.43459	Biological Process	4
defense response to virus	4.43459	Biological Process	4
positive regulation of microtubule polymerization	4.43459	Biological Process	4
response to exogenous dsRNA	4.43459	Biological Process	4
apoptotic process	4.43459	Biological Process	4
skeletal system development	4.43459	Biological Process	4
nucleosome assembly	4.43459	Biological Process	4
gamma-aminobutyric acid transport	4.43459	Biological Process	4
positive regulation of chemokine production	4.43459	Biological Process	4
methylation	4.43459	Biological Process	4
one-carbon metabolic process	4.43459	Biological Process	4
extracellular matrix organization	4.43459	Biological Process	4
positive regulation of JNK cascade	4.43459	Biological Process	4
oligodendrocyte differentiation	4.43459	Biological Process	4
negative regulation of canonical Wnt signaling pathway	4.43459	Biological Process	4
otic placode formation	4.43459	Biological Process	4
actin filament bundle assembly	4.43459	Biological Process	4
locomotion	4.43459	Biological Process	4
sprouting angiogenesis	4.43459	Biological Process	4
protein ubiquitination	4.43459	Biological Process	4
negative regulation of substrate adhesion-dependent cell spreading	4.43459	Biological Process	4
ubiquitin-dependent protein catabolic process	4.43459	Biological Process	4
regulation of cell proliferation involved in tissue homeostasis	4.43459	Biological Process	4
synaptic vesicle fusion to presynaptic active zone membrane	4.43459	Biological Process	4
steroid hormone mediated signaling pathway	4.43459	Biological Process	4
response to oxidative stress	4.43459	Biological Process	4
retrograde transport, endosome to Golgi	3.32594	Biological Process	3
intestinal epithelial structure maintenance	3.32594	Biological Process	3
response to interleukin-12	3.32594	Biological Process	3
cellular iron ion homeostasis	3.32594	Biological Process	3
tissue homeostasis	3.32594	Biological Process	3
nucleotide-binding oligomerization domain containing signaling pathway	3.32594	Biological Process	3
nucleotide-binding oligomerization domain containing 1 signaling pathway	3.32594	Biological Process	3
negative regulation of myoblast differentiation	3.32594	Biological Process	3
dentate gyrus development	3.32594	Biological Process	3
positive regulation of protein serine/threonine kinase activity	3.32594	Biological Process	3
cellular response to lipoteichoic acid	3.32594	Biological Process	3
response to interleukin-18	3.32594	Biological Process	3
central nervous system neuron development	3.32594	Biological Process	3
positive regulation of interleukin-12 production	3.32594	Biological Process	3
positive regulation of interleukin-6 production	3.32594	Biological Process	3
positive regulation of interferon-gamma production	3.32594	Biological Process	3
Sertoli cell differentiation	3.32594	Biological Process	3
cellular response to mechanical stimulus	3.32594	Biological Process	3
positive regulation of phosphatidylinositol 3-kinase signaling	3.32594	Biological Process	3
positive regulation of mesenchymal cell proliferation	3.32594	Biological Process	3
positive regulation of NF-kappaB transcription factor activity	3.32594	Biological Process	3
negative regulation of cell migration	3.32594	Biological Process	3
positive regulation of kidney development	3.32594	Biological Process	3
regulation of cell cycle process	3.32594	Biological Process	3
epiboly involved in gastrulation with mouth forming second	3.32594	Biological Process	3
retinal rod cell differentiation	3.32594	Biological Process	3
signal transduction by protein phosphorylation	3.32594	Biological Process	3
negative regulation of immune system process	3.32594	Biological Process	3
morphogenesis of a branching epithelium	3.32594	Biological Process	3
regulation of protein stability	3.32594	Biological Process	3
adaptive immune response	3.32594	Biological Process	3
male meiotic nuclear division	3.32594	Biological Process	3
response to interleukin-1	3.32594	Biological Process	3
positive regulation of interferon-beta production	3.32594	Biological Process	3
positive regulation of alpha-beta T cell proliferation	3.32594	Biological Process	3
cellular response to peptidoglycan	3.32594	Biological Process	3
positive regulation of chondrocyte differentiation	3.32594	Biological Process	3
negative regulation of photoreceptor cell differentiation	3.32594	Biological Process	3
dorsal/ventral pattern formation	3.32594	Biological Process	3
negative regulation of cell death	3.32594	Biological Process	3
positive regulation of interferon-alpha production	3.32594	Biological Process	3
positive regulation of branching involved in ureteric bud morphogenesis	3.32594	Biological Process	3
positive regulation of T-helper 1 cell differentiation	3.32594	Biological Process	3
myeloid cell development	3.32594	Biological Process	3
ERK1 and ERK2 cascade	3.32594	Biological Process	3
negative regulation of epithelial cell proliferation	3.32594	Biological Process	3
lifelong otolith mineralization	3.32594	Biological Process	3
activation of protein kinase activity	3.32594	Biological Process	3
protein quality control for misfolded or incompletely synthesized proteins	3.32594	Biological Process	3
peptidyl-tyrosine phosphorylation	3.32594	Biological Process	3
T cell receptor signaling pathway	3.32594	Biological Process	3
chondrocyte differentiation involved in endochondral bone morphogenesis	3.32594	Biological Process	3
alpha-beta T cell differentiation	3.32594	Biological Process	3
cartilage morphogenesis	3.32594	Biological Process	3
otic vesicle formation	3.32594	Biological Process	3
mitochondrion organization	3.32594	Biological Process	3
negative regulation of biomineral tissue development	3.32594	Biological Process	3
chromatin remodeling	3.32594	Biological Process	3
3'-UTR-mediated mRNA destabilization	3.32594	Biological Process	3
astrocyte differentiation	3.32594	Biological Process	3
chondrocyte hypertrophy	3.32594	Biological Process	3
chromatin assembly or disassembly	3.32594	Biological Process	3
fin regeneration	3.32594	Biological Process	3
collagen fibril organization	3.32594	Biological Process	3
cellular response to heparin	3.32594	Biological Process	3
anion transport	3.32594	Biological Process	3
myeloid cell activation involved in immune response	3.32594	Biological Process	3
hair follicle development	3.32594	Biological Process	3
cellular response to DNA damage stimulus	3.32594	Biological Process	3
positive regulation of epithelial cell proliferation	3.32594	Biological Process	3
negative regulation of protein kinase B signaling	3.32594	Biological Process	3
G protein-coupled receptor signaling pathway	3.32594	Biological Process	3
cell fate specification	3.32594	Biological Process	3
cAMP-mediated signaling	3.32594	Biological Process	3
cellular response to epidermal growth factor stimulus	3.32594	Biological Process	3
defense response to Gram-positive bacterium	3.32594	Biological Process	3
protein heterooligomerization	3.32594	Biological Process	3
somatic stem cell population maintenance	3.32594	Biological Process	3
lipid metabolic process	3.32594	Biological Process	3
negative regulation of focal adhesion assembly	3.32594	Biological Process	3
eye morphogenesis	3.32594	Biological Process	3
sarcomerogenesis	3.32594	Biological Process	3
T cell proliferation	3.32594	Biological Process	3
angiogenesis	3.32594	Biological Process	3
phosphatidylinositol dephosphorylation	3.32594	Biological Process	3
positive regulation of peptidyl-serine phosphorylation	3.32594	Biological Process	3
mRNA processing	3.32594	Biological Process	3
cartilage condensation	3.32594	Biological Process	3
negative regulation of chondrocyte differentiation	3.32594	Biological Process	3
positive regulation of immature T cell proliferation	3.32594	Biological Process	3
nucleotide-binding oligomerization domain containing 2 signaling pathway	3.32594	Biological Process	3
cellular response to muramyl dipeptide	3.32594	Biological Process	3
glomerular visceral epithelial cell development	3.32594	Biological Process	3
male germ-line sex determination	3.32594	Biological Process	3
positive regulation of epithelial cell differentiation	3.32594	Biological Process	3
peptidyl-tyrosine autophosphorylation	3.32594	Biological Process	3
positive regulation of interleukin-2 production	3.32594	Biological Process	3
ventricular cardiac myofibril assembly	3.32594	Biological Process	3
positive regulation of tumor necrosis factor production	3.32594	Biological Process	3
neuron projection development	3.32594	Biological Process	3
epithelial cell proliferation involved in prostatic bud elongation	3.32594	Biological Process	3
thymus development	3.32594	Biological Process	3
regulation of protein kinase B signaling	3.32594	Biological Process	3
positive regulation of epithelial cell migration	3.32594	Biological Process	3
endocardial cushion morphogenesis	3.32594	Biological Process	3
lipopolysaccharide-mediated signaling pathway	3.32594	Biological Process	3
heart valve morphogenesis	3.32594	Biological Process	3
positive regulation of cytokine-mediated signaling pathway	3.32594	Biological Process	3
axonogenesis	3.32594	Biological Process	3
toll-like receptor 4 signaling pathway	3.32594	Biological Process	3
metanephric nephron tubule formation	3.32594	Biological Process	3
protein kinase B signaling	3.32594	Biological Process	3
negative regulation of angiogenesis	3.32594	Biological Process	3
positive regulation of male gonad development	3.32594	Biological Process	3
embryonic neurocranium morphogenesis	3.32594	Biological Process	3
toll-like receptor 2 signaling pathway	3.32594	Biological Process	3
spermatogenesis	3.32594	Biological Process	3
cochlea morphogenesis	3.32594	Biological Process	3
positive regulation of mesenchymal stem cell differentiation	3.32594	Biological Process	3
renal vesicle induction	3.32594	Biological Process	3
microspike assembly	2.21729	Biological Process	2
positive regulation of Wnt signaling pathway, planar cell polarity pathway	2.21729	Biological Process	2
embryonic camera-type eye morphogenesis	2.21729	Biological Process	2
morphogenesis of a branching structure	2.21729	Biological Process	2
determination of heart left/right asymmetry	2.21729	Biological Process	2
collateral sprouting	2.21729	Biological Process	2
locomotor rhythm	2.21729	Biological Process	2
cell population proliferation	2.21729	Biological Process	2
DNA repair	2.21729	Biological Process	2
integrin-mediated signaling pathway	2.21729	Biological Process	2
skeletal muscle cell differentiation	2.21729	Biological Process	2
negative regulation of BMP signaling pathway	2.21729	Biological Process	2
blood coagulation	2.21729	Biological Process	2
regulation of canonical Wnt signaling pathway	2.21729	Biological Process	2
protein processing	2.21729	Biological Process	2
Notch signaling pathway	2.21729	Biological Process	2
positive regulation of protein complex assembly	2.21729	Biological Process	2
cell surface receptor signaling pathway	2.21729	Biological Process	2
positive regulation of neuron death	2.21729	Biological Process	2
dorsal/ventral axis specification	2.21729	Biological Process	2
protein ADP-ribosylation	2.21729	Biological Process	2
substrate adhesion-dependent cell spreading	2.21729	Biological Process	2
cell-cell signaling	2.21729	Biological Process	2
signal transduction in response to DNA damage	2.21729	Biological Process	2
cell recognition	2.21729	Biological Process	2
protein localization to adherens junction	2.21729	Biological Process	2
response to cytokine	2.21729	Biological Process	2
protein import into peroxisome matrix	2.21729	Biological Process	2
B cell proliferation involved in immune response	2.21729	Biological Process	2
cerebellum morphogenesis	2.21729	Biological Process	2
positive regulation of interleukin-2 secretion	2.21729	Biological Process	2
negative regulation of protein serine/threonine kinase activity	2.21729	Biological Process	2
regulation of RIG-I signaling pathway	2.21729	Biological Process	2
B-1 B cell homeostasis	2.21729	Biological Process	2
protein targeting to peroxisome	2.21729	Biological Process	2
positive regulation of osteoblast proliferation	2.21729	Biological Process	2
Rho protein signal transduction	2.21729	Biological Process	2
autophagy of mitochondrion	2.21729	Biological Process	2
positive regulation of apoptotic signaling pathway	2.21729	Biological Process	2
modification-dependent protein catabolic process	2.21729	Biological Process	2
cardiac septum development	2.21729	Biological Process	2
positive regulation of mitotic cell cycle	2.21729	Biological Process	2
Golgi to plasma membrane protein transport	2.21729	Biological Process	2
negative regulation of I-kappaB kinase/NF-kappaB signaling	2.21729	Biological Process	2
negative regulation of phospholipase C activity	2.21729	Biological Process	2
regulation of small GTPase mediated signal transduction	2.21729	Biological Process	2
neuromuscular process controlling balance	2.21729	Biological Process	2
mitochondrial outer membrane permeabilization	2.21729	Biological Process	2
protein catabolic process	2.21729	Biological Process	2
intestinal epithelial cell development	2.21729	Biological Process	2
cell communication	2.21729	Biological Process	2
maternal placenta development	2.21729	Biological Process	2
negative regulation of translation	2.21729	Biological Process	2
regulation of cilium assembly	2.21729	Biological Process	2
somitogenesis	2.21729	Biological Process	2
coronary vasculature development	2.21729	Biological Process	2
cell migration	2.21729	Biological Process	2
mediolateral intercalation	2.21729	Biological Process	2
definitive hemopoiesis	2.21729	Biological Process	2
aorta development	2.21729	Biological Process	2
ion transport	2.21729	Biological Process	2
positive regulation of type I interferon-mediated signaling pathway	2.21729	Biological Process	2
SREBP signaling pathway	2.21729	Biological Process	2
heterophilic cell-cell adhesion via plasma membrane cell adhesion molecules	2.21729	Biological Process	2
positive regulation of nuclear-transcribed mRNA poly(A) tail shortening	2.21729	Biological Process	2
positive regulation of interferon-gamma secretion	2.21729	Biological Process	2
positive regulation of oxidoreductase activity	2.21729	Biological Process	2
negative regulation of lipopolysaccharide-mediated signaling pathway	2.21729	Biological Process	2
negative regulation of amyloid precursor protein biosynthetic process	2.21729	Biological Process	2
ventricular septum development	2.21729	Biological Process	2
mitotic cell cycle checkpoint	2.21729	Biological Process	2
posterior lateral line neuromast development	2.21729	Biological Process	2
associative learning	2.21729	Biological Process	2
eye photoreceptor cell development	2.21729	Biological Process	2
regulation of cell growth	2.21729	Biological Process	2
regulation of response to reactive oxygen species	2.21729	Biological Process	2
neuron apoptotic process	2.21729	Biological Process	2
cellular response to xenobiotic stimulus	2.21729	Biological Process	2
phagocytosis	2.21729	Biological Process	2
astrocyte development	2.21729	Biological Process	2
embryonic placenta development	2.21729	Biological Process	2
response to iron(II) ion	2.21729	Biological Process	2
regulation of mitotic cell cycle	2.21729	Biological Process	2
Bergmann glial cell differentiation	2.21729	Biological Process	2
positive regulation of neuron apoptotic process	2.21729	Biological Process	2
bicellular tight junction assembly	2.21729	Biological Process	2
regulation of axon extension	2.21729	Biological Process	2
cell morphogenesis involved in differentiation	2.21729	Biological Process	2
motor neuron axon guidance	2.21729	Biological Process	2
protein citrullination	2.21729	Biological Process	2
regulation of cell migration	2.21729	Biological Process	2
regulation of GTPase activity	2.21729	Biological Process	2
exocrine pancreas development	2.21729	Biological Process	2
regulation of anion transport	2.21729	Biological Process	2
neuron migration	2.21729	Biological Process	2
post-embryonic development	2.21729	Biological Process	2
proline catabolic process	2.21729	Biological Process	2
tricarboxylic acid cycle	2.21729	Biological Process	2
DNA damage induced protein phosphorylation	2.21729	Biological Process	2
habenula development	2.21729	Biological Process	2
negative regulation of cell-cell adhesion	2.21729	Biological Process	2
trophoblast giant cell differentiation	2.21729	Biological Process	2
positive regulation of release of sequestered calcium ion into cytosol	2.21729	Biological Process	2
axon guidance	2.21729	Biological Process	2
embryonic viscerocranium morphogenesis	2.21729	Biological Process	2
central nervous system development	2.21729	Biological Process	2
protein methylation	2.21729	Biological Process	2
vacuolar transport	2.21729	Biological Process	2
cytoplasmic mRNA processing body assembly	2.21729	Biological Process	2
protein deglycosylation	2.21729	Biological Process	2
artery morphogenesis	2.21729	Biological Process	2
proteolysis involved in cellular protein catabolic process	2.21729	Biological Process	2
cellular developmental process	2.21729	Biological Process	2
regulation of actin cytoskeleton organization	2.21729	Biological Process	2
endocrine pancreas development	2.21729	Biological Process	2
negative regulation of cellular senescence	2.21729	Biological Process	2
germ cell development	2.21729	Biological Process	2
in utero embryonic development	2.21729	Biological Process	2
activated T cell proliferation	2.21729	Biological Process	2
RIG-I signaling pathway	2.21729	Biological Process	2
spleen development	2.21729	Biological Process	2
regulation of cell-cell adhesion	2.21729	Biological Process	2
negative regulation of mitotic cell cycle	2.21729	Biological Process	2
platelet-derived growth factor receptor-beta signaling pathway	2.21729	Biological Process	2
positive regulation of cytosolic calcium ion concentration	2.21729	Biological Process	2
establishment of protein localization	2.21729	Biological Process	2
dorsal convergence	2.21729	Biological Process	2
regulation of dendrite morphogenesis	2.21729	Biological Process	2
actin filament branching	2.21729	Biological Process	2
positive regulation of B cell differentiation	2.21729	Biological Process	2
proline metabolic process	2.21729	Biological Process	2
phospholipid biosynthetic process	2.21729	Biological Process	2
negative regulation of B cell proliferation	2.21729	Biological Process	2
regulation of translation	2.21729	Biological Process	2
negative regulation of endothelial cell apoptotic process	2.21729	Biological Process	2
regulation of extracellular matrix organization	2.21729	Biological Process	2
transitional one stage B cell differentiation	2.21729	Biological Process	2
synaptic vesicle priming	2.21729	Biological Process	2
negative regulation of ubiquitin-protein transferase activity	2.21729	Biological Process	2
negative regulation of ERK1 and ERK2 cascade	2.21729	Biological Process	2
NIK/NF-kappaB signaling	2.21729	Biological Process	2
branching involved in blood vessel morphogenesis	2.21729	Biological Process	2
negative regulation of neural precursor cell proliferation	2.21729	Biological Process	2
vesicle docking	2.21729	Biological Process	2
response to wounding	2.21729	Biological Process	2
regulation of response to DNA damage stimulus	2.21729	Biological Process	2
Golgi to endosome transport	2.21729	Biological Process	2
intermediate filament cytoskeleton organization	1.10865	Biological Process	1
heart field specification	1.10865	Biological Process	1
endocardial cell differentiation	1.10865	Biological Process	1
regulation of retinoic acid biosynthetic process	1.10865	Biological Process	1
apoptotic process involved in morphogenesis	1.10865	Biological Process	1
mitochondrion transport along microtubule	1.10865	Biological Process	1
regulation of vascular endothelial growth factor signaling pathway	1.10865	Biological Process	1
cardioblast migration to the midline involved in heart rudiment formation	1.10865	Biological Process	1
angioblast cell differentiation	1.10865	Biological Process	1
cellular homeostasis	1.10865	Biological Process	1
desmosome organization	1.10865	Biological Process	1
mammary gland development	1.10865	Biological Process	1
hemostasis	1.10865	Biological Process	1
developmental pigmentation	1.10865	Biological Process	1
positive regulation of reactive oxygen species metabolic process	1.10865	Biological Process	1
protein N-linked glycosylation	1.10865	Biological Process	1
regulation of phosphatidylinositol 3-kinase activity	1.10865	Biological Process	1
double-strand break repair	1.10865	Biological Process	1
maturation of 5.8S rRNA	1.10865	Biological Process	1
regulation of nucleic acid-templated transcription	1.10865	Biological Process	1
regulation of protein export from nucleus	1.10865	Biological Process	1
forebrain radial glial cell differentiation	1.10865	Biological Process	1
vasculogenesis	1.10865	Biological Process	1
neuromast development	1.10865	Biological Process	1
detection of calcium ion	1.10865	Biological Process	1
positive regulation of blood coagulation	1.10865	Biological Process	1
protein K11-linked deubiquitination	1.10865	Biological Process	1
ectoderm development	1.10865	Biological Process	1
negative regulation of TOR signaling	1.10865	Biological Process	1
vascular endothelial growth factor receptor signaling pathway	1.10865	Biological Process	1
determination of left/right asymmetry in lateral mesoderm	1.10865	Biological Process	1
piecemeal microautophagy of the nucleus	1.10865	Biological Process	1
regulation of vesicle fusion	1.10865	Biological Process	1
negative stranded viral RNA replication	1.10865	Biological Process	1
megakaryocyte development	1.10865	Biological Process	1
cilium assembly	1.10865	Biological Process	1
endothelial cell proliferation	1.10865	Biological Process	1
regulation of embryonic development	1.10865	Biological Process	1
fatty acid metabolic process	1.10865	Biological Process	1
face morphogenesis	1.10865	Biological Process	1
endothelial cell chemotaxis	1.10865	Biological Process	1
eye pigmentation	1.10865	Biological Process	1
activation of JNKK activity	1.10865	Biological Process	1
double-strand break repair via homologous recombination	1.10865	Biological Process	1
determination of liver left/right asymmetry	1.10865	Biological Process	1
forebrain neuron differentiation	1.10865	Biological Process	1
convergent extension	1.10865	Biological Process	1
blood vessel endothelial cell migration	1.10865	Biological Process	1
epithelial cell development	1.10865	Biological Process	1
regulation of dendritic spine morphogenesis	1.10865	Biological Process	1
ossification	1.10865	Biological Process	1
dendritic cell antigen processing and presentation	1.10865	Biological Process	1
N-acetylglucosamine metabolic process	1.10865	Biological Process	1
regulation of cytosolic calcium ion concentration	1.10865	Biological Process	1
glycolytic process	1.10865	Biological Process	1
resolution of recombination intermediates	1.10865	Biological Process	1
biosynthetic process	1.10865	Biological Process	1
response to dsRNA	1.10865	Biological Process	1
neural crest formation	1.10865	Biological Process	1
nucleate erythrocyte development	1.10865	Biological Process	1
positive regulation of ryanodine-sensitive calcium-release channel activity	1.10865	Biological Process	1
regulation of mitotic spindle assembly	1.10865	Biological Process	1
protein localization to phagophore assembly site	1.10865	Biological Process	1
muscle attachment	1.10865	Biological Process	1
adenylate cyclase-activating G protein-coupled receptor signaling pathway	1.10865	Biological Process	1
cell morphogenesis	1.10865	Biological Process	1
vascular endothelial growth factor signaling pathway	1.10865	Biological Process	1
fin development	1.10865	Biological Process	1
negative regulation of interleukin-5 production	1.10865	Biological Process	1
response to virus	1.10865	Biological Process	1
methylglyoxal catabolic process to D-lactate via S-lactoyl-glutathione	1.10865	Biological Process	1
odontoblast differentiation	1.10865	Biological Process	1
protein stabilization	1.10865	Biological Process	1
proteasome-mediated ubiquitin-dependent protein catabolic process	1.10865	Biological Process	1
ubiquinone biosynthetic process	1.10865	Biological Process	1
somite specification	1.10865	Biological Process	1
ceramide biosynthetic process	1.10865	Biological Process	1
blood vessel endothelial cell proliferation involved in sprouting angiogenesis	1.10865	Biological Process	1
UDP-N-acetylglucosamine biosynthetic process	1.10865	Biological Process	1
camera-type eye morphogenesis	1.10865	Biological Process	1
regulation of mRNA processing	1.10865	Biological Process	1
MyD88-independent toll-like receptor signaling pathway	1.10865	Biological Process	1
negative regulation of protein ubiquitination	1.10865	Biological Process	1
protein localization to synapse	1.10865	Biological Process	1
microtubule-based process	1.10865	Biological Process	1
mitotic metaphase plate congression	1.10865	Biological Process	1
pronephric distal tubule development	1.10865	Biological Process	1
adrenal gland development	1.10865	Biological Process	1
immune response involved in response to exogenous dsRNA	1.10865	Biological Process	1
adherens junction organization	1.10865	Biological Process	1
gastrulation with mouth forming second	1.10865	Biological Process	1
tetrahydrobiopterin biosynthetic process	1.10865	Biological Process	1
muscle fiber development	1.10865	Biological Process	1
N-acetylneuraminate catabolic process	1.10865	Biological Process	1
segmentation	1.10865	Biological Process	1
hypothalamus cell differentiation	1.10865	Biological Process	1
cellular response to organic cyclic compound	1.10865	Biological Process	1
positive regulation of protein targeting to membrane	1.10865	Biological Process	1
lymphangiogenesis	1.10865	Biological Process	1
midbrain development	1.10865	Biological Process	1
ammonium transmembrane transport	1.10865	Biological Process	1
receptor clustering	1.10865	Biological Process	1
adenylate cyclase-modulating G protein-coupled receptor signaling pathway	1.10865	Biological Process	1
determination of pancreatic left/right asymmetry	1.10865	Biological Process	1
cellular protein modification process	1.10865	Biological Process	1
behavioral response to cocaine	1.10865	Biological Process	1
regulation of synaptic vesicle recycling	1.10865	Biological Process	1
N-glycan processing	1.10865	Biological Process	1
endoplasmic reticulum membrane fusion	1.10865	Biological Process	1
glomerular visceral epithelial cell differentiation	1.10865	Biological Process	1
apoptotic DNA fragmentation	1.10865	Biological Process	1
positive regulation of neurogenesis	1.10865	Biological Process	1
regulation of release of sequestered calcium ion into cytosol by sarcoplasmic reticulum	1.10865	Biological Process	1
gluconeogenesis	1.10865	Biological Process	1
cerebellar cortex formation	1.10865	Biological Process	1
mesendoderm development	1.10865	Biological Process	1
formation of radial glial scaffolds	1.10865	Biological Process	1
positive regulation of actin filament polymerization	1.10865	Biological Process	1
deadenylation-dependent decapping of nuclear-transcribed mRNA	1.10865	Biological Process	1
barbed-end actin filament capping	1.10865	Biological Process	1
pronephric nephron tubule epithelial cell differentiation	1.10865	Biological Process	1
ventricular system development	1.10865	Biological Process	1
regulation of blood pressure	1.10865	Biological Process	1
regulation of cardiac muscle contraction	1.10865	Biological Process	1
cellular response to oxidative stress	1.10865	Biological Process	1
septum digestion after cytokinesis	1.10865	Biological Process	1
activation of phospholipase D activity	1.10865	Biological Process	1
erythrocyte development	1.10865	Biological Process	1
germ cell migration	1.10865	Biological Process	1
positive regulation of phosphoprotein phosphatase activity	1.10865	Biological Process	1
eye development	1.10865	Biological Process	1
protein K48-linked ubiquitination	1.10865	Biological Process	1
intermediate mesoderm development	1.10865	Biological Process	1
negative regulation of proteolysis	1.10865	Biological Process	1
negative regulation of axon extension	1.10865	Biological Process	1
exit from mitosis	1.10865	Biological Process	1
autophagosome assembly	1.10865	Biological Process	1
endodermal cell differentiation	1.10865	Biological Process	1
carboxylic acid metabolic process	1.10865	Biological Process	1
ATP-dependent chromatin remodeling	1.10865	Biological Process	1
regulation of autophagosome assembly	1.10865	Biological Process	1
regulation of reactive oxygen species metabolic process	1.10865	Biological Process	1
positive regulation of mitochondrial fission	1.10865	Biological Process	1
positive regulation of inflammatory response	1.10865	Biological Process	1
negative regulation of epidermal growth factor receptor signaling pathway	1.10865	Biological Process	1
peptidyl-threonine phosphorylation	1.10865	Biological Process	1
head development	1.10865	Biological Process	1
negative regulation of neuron death	1.10865	Biological Process	1
G2/M transition of mitotic cell cycle	1.10865	Biological Process	1
nucleocytoplasmic transport	1.10865	Biological Process	1
negative regulation of apoptotic process in bone marrow cell	1.10865	Biological Process	1
layer formation in cerebral cortex	1.10865	Biological Process	1
synaptic transmission, glutamatergic	1.10865	Biological Process	1
protein sumoylation	1.10865	Biological Process	1
regulation of planar cell polarity pathway involved in axis elongation	1.10865	Biological Process	1
cell-matrix adhesion	1.10865	Biological Process	1
cellular response to reactive oxygen species	1.10865	Biological Process	1
hypothalamus development	1.10865	Biological Process	1
autophagy	1.10865	Biological Process	1
regulation of cytokinesis	1.10865	Biological Process	1
formation of translation preinitiation complex	1.10865	Biological Process	1
late nucleophagy	1.10865	Biological Process	1
posterior lateral line neuromast deposition	1.10865	Biological Process	1
diencephalon development	1.10865	Biological Process	1
neutrophil differentiation	1.10865	Biological Process	1
aflatoxin B1 metabolic process	1.10865	Biological Process	1
glutamine metabolic process	1.10865	Biological Process	1
toll-like receptor signaling pathway	1.10865	Biological Process	1
posterior lateral line development	1.10865	Biological Process	1
negative regulation of protein export from nucleus	1.10865	Biological Process	1
lipid transport	1.10865	Biological Process	1
fin morphogenesis	1.10865	Biological Process	1
skeletal muscle contraction	1.10865	Biological Process	1
dopaminergic neuron differentiation	1.10865	Biological Process	1
pronephric proximal tubule development	1.10865	Biological Process	1
pyruvate metabolic process	1.10865	Biological Process	1
receptor-mediated endocytosis	1.10865	Biological Process	1
otolith morphogenesis	1.10865	Biological Process	1
response to calcium ion	1.10865	Biological Process	1
positive regulation of JUN kinase activity	1.10865	Biological Process	1
synaptic transmission, dopaminergic	1.10865	Biological Process	1
positive regulation of cell proliferation in bone marrow	1.10865	Biological Process	1
T cell activation involved in immune response	1.10865	Biological Process	1
cell-cell adhesion involved in gastrulation	1.10865	Biological Process	1
positive regulation of protein binding	1.10865	Biological Process	1
excitatory postsynaptic potential	1.10865	Biological Process	1
toll-like receptor 3 signaling pathway	1.10865	Biological Process	1
regulation of macroautophagy	1.10865	Biological Process	1
cardiac muscle contraction	1.10865	Biological Process	1
planar cell polarity pathway involved in axis elongation	1.10865	Biological Process	1
regulation of synaptic plasticity	1.10865	Biological Process	1
negative regulation of transcription elongation from RNA polymerase II promoter	1.10865	Biological Process	1
heart jogging	1.10865	Biological Process	1
pigment cell differentiation	1.10865	Biological Process	1
endoderm formation	1.10865	Biological Process	1
cell death	1.10865	Biological Process	1
determination of digestive tract left/right asymmetry	1.10865	Biological Process	1
brain development	1.10865	Biological Process	1
calcium ion transmembrane transport	1.10865	Biological Process	1
gene silencing	1.10865	Biological Process	1
negative regulation of interleukin-4 production	1.10865	Biological Process	1
Kupffer's vesicle development	1.10865	Biological Process	1
optokinetic behavior	1.10865	Biological Process	1
protein K48-linked deubiquitination	1.10865	Biological Process	1
response to hypoxia	1.10865	Biological Process	1
regulation of Fc receptor mediated stimulatory signaling pathway	1.10865	Biological Process	1
type I interferon signaling pathway	1.10865	Biological Process	1
regulation of angiogenesis	1.10865	Biological Process	1
phospholipid transport	1.10865	Biological Process	1
positive regulation of endothelial cell proliferation	1.10865	Biological Process	1
glycoside catabolic process	1.10865	Biological Process	1
hippocampus development	1.10865	Biological Process	1
cyclooxygenase pathway	1.10865	Biological Process	1
regulation of endodermal cell differentiation	1.10865	Biological Process	1
larval heart development	1.10865	Biological Process	1
response to ionizing radiation	1.10865	Biological Process	1
pronephric glomerulus morphogenesis	1.10865	Biological Process	1
manganese ion transport	1.10865	Biological Process	1
response to activity	1.10865	Biological Process	1
replicative cell aging	1.10865	Biological Process	1
visual learning	1.10865	Biological Process	1
ion transmembrane transport	1.10865	Biological Process	1
regulation of cell differentiation	1.10865	Biological Process	1
regulation of striated muscle tissue development	1.10865	Biological Process	1
acyl-CoA metabolic process	1.10865	Biological Process	1
regulation of signal transduction by p53 class mediator	1.10865	Biological Process	1
single fertilization	1.10865	Biological Process	1
vasculature development	1.10865	Biological Process	1
phosphatidylinositol phosphorylation	1.10865	Biological Process	1
glycogen catabolic process	1.10865	Biological Process	1
ubiquitin-dependent SMAD protein catabolic process	1.10865	Biological Process	1
embryonic heart tube development	1.10865	Biological Process	1
neural crest cell development	1.10865	Biological Process	1
Schwann cell development	1.10865	Biological Process	1
neural tube formation	1.10865	Biological Process	1
adherens junction maintenance	1.10865	Biological Process	1
regulation of heart rate	1.10865	Biological Process	1
sister chromatid cohesion	1.10865	Biological Process	1
intrahepatic bile duct development	1.10865	Biological Process	1
cellular response to hydrogen peroxide	1.10865	Biological Process	1
activation of JUN kinase activity	1.10865	Biological Process	1
organic cation transport	1.10865	Biological Process	1
prostaglandin biosynthetic process	1.10865	Biological Process	1
positive regulation of protein kinase activity	1.10865	Biological Process	1
positive regulation of oxidative phosphorylation uncoupler activity	1.10865	Biological Process	1
nucleus organization	1.10865	Biological Process	1
regulation of blood vessel size	1.10865	Biological Process	1
regulation of glucocorticoid metabolic process	1.10865	Biological Process	1
melanosome organization	1.10865	Biological Process	1
endoplasmic reticulum to Golgi vesicle-mediated transport	1.10865	Biological Process	1
positive regulation of signaling receptor activity	1.10865	Biological Process	1
substantia nigra development	1.10865	Biological Process	1
striated muscle tissue development	1.10865	Biological Process	1
protein localization to cytoskeleton	1.10865	Biological Process	1
habituation	1.10865	Biological Process	1
regulation of cell cycle arrest	1.10865	Biological Process	1
[2Fe-2S] cluster assembly	1.10865	Biological Process	1
negative regulation of programmed cell death	1.10865	Biological Process	1
establishment of epithelial cell apical/basal polarity	1.10865	Biological Process	1
caudal fin development	1.10865	Biological Process	1
synaptic vesicle exocytosis	1.10865	Biological Process	1
neurogenesis	1.10865	Biological Process	1
insulin receptor signaling pathway	1.10865	Biological Process	1
viral entry into host cell	1.10865	Biological Process	1
corpus callosum development	1.10865	Biological Process	1
muscle contraction	1.10865	Biological Process	1
nitrogen utilization	1.10865	Biological Process	1
trachea gland development	1.10865	Biological Process	1
positive regulation of pseudopodium assembly	1.10865	Biological Process	1
positive regulation of signal transduction	1.10865	Biological Process	1
N-acetylglucosamine catabolic process	1.10865	Biological Process	1
lipid hydroxylation	1.10865	Biological Process	1
axonal fasciculation	1.10865	Biological Process	1
negative regulation of synaptic plasticity	1.10865	Biological Process	1
paraxial mesoderm formation	1.10865	Biological Process	1
response to bacterium	1.10865	Biological Process	1
regulation of keratinocyte differentiation	1.10865	Biological Process	1
protein autoubiquitination	1.10865	Biological Process	1
nuclear envelope reassembly	1.10865	Biological Process	1
carbon catabolite repression of transcription by glucose	1.10865	Biological Process	1
regulation of vascular endothelial growth factor receptor signaling pathway	1.10865	Biological Process	1
asparagine biosynthetic process	1.10865	Biological Process	1
BMP signaling pathway	1.10865	Biological Process	1
regulation of cytokine production	1.10865	Biological Process	1
malate-aspartate shuttle	1.10865	Biological Process	1
synaptic vesicle endocytosis	1.10865	Biological Process	1
pronephros development	1.10865	Biological Process	1
negative regulation of transforming growth factor beta receptor signaling pathway	1.10865	Biological Process	1
mitotic chromosome condensation	1.10865	Biological Process	1
Golgi reassembly	1.10865	Biological Process	1
protein maturation by iron-sulfur cluster transfer	1.10865	Biological Process	1
receptor catabolic process	1.10865	Biological Process	1
synapse assembly	1.10865	Biological Process	1
lauric acid metabolic process	1.10865	Biological Process	1
neural tube closure	1.10865	Biological Process	1
ganglioside catabolic process	1.10865	Biological Process	1
positive regulation of cytokine production	1.10865	Biological Process	1
negative regulation of cysteine-type endopeptidase activity involved in apoptotic process	1.10865	Biological Process	1
sensory perception of pain	1.10865	Biological Process	1
ubiquitin-dependent ERAD pathway	1.10865	Biological Process	1
regulation of nodal signaling pathway	1.10865	Biological Process	1
positive regulation of actin cytoskeleton reorganization	1.10865	Biological Process	1
actin filament capping	1.10865	Biological Process	1
positive regulation of cyclic-nucleotide phosphodiesterase activity	1.10865	Biological Process	1
response to lipopolysaccharide	1.10865	Biological Process	1
mannose metabolic process	1.10865	Biological Process	1
cell migration involved in gastrulation	1.10865	Biological Process	1
sensory epithelium regeneration	1.10865	Biological Process	1
common bile duct development	1.10865	Biological Process	1
calcium ion import	1.10865	Biological Process	1
antigen processing and presentation	1.10865	Biological Process	1
cellular response to cold	1.10865	Biological Process	1
canonical Wnt signaling pathway	1.10865	Biological Process	1
maturation of LSU-rRNA	1.10865	Biological Process	1
negative regulation of cell cycle	1.10865	Biological Process	1
regulation of centrosome duplication	1.10865	Biological Process	1
forebrain neuroblast division	1.10865	Biological Process	1
kidney development	1.10865	Biological Process	1
cell-cell adhesion involved in mesendodermal cell migration	1.10865	Biological Process	1
negative regulation of interleukin-13 production	1.10865	Biological Process	1
blood vessel morphogenesis	1.10865	Biological Process	1
cortical actin cytoskeleton organization	1.10865	Biological Process	1
cell migration involved in sprouting angiogenesis	1.10865	Biological Process	1
dendrite morphogenesis	1.10865	Biological Process	1
ATP biosynthetic process	1.10865	Biological Process	1
embryonic limb morphogenesis	1.10865	Biological Process	1
apoptotic signaling pathway	1.10865	Biological Process	1
semicircular canal development	1.10865	Biological Process	1
positive regulation of calcium ion-dependent exocytosis	1.10865	Biological Process	1
positive regulation of DNA repair	1.10865	Biological Process	1
regulation of cell adhesion	1.10865	Biological Process	1
protein deubiquitination	1.10865	Biological Process	1
membrane protein ectodomain proteolysis	1.10865	Biological Process	1
lens morphogenesis in camera-type eye	1.10865	Biological Process	1
lens fiber cell morphogenesis	1.10865	Biological Process	1
regulation of neuron apoptotic process	1.10865	Biological Process	1
membrane	90.9091	Cellular Component	164
integral component of membrane	89.8004	Cellular Component	162
cytoplasm	66.5188	Cellular Component	120
nucleus	47.1175	Cellular Component	85
plasma membrane	19.4013	Cellular Component	35
integral component of plasma membrane	16.0754	Cellular Component	29
extracellular space	11.0865	Cellular Component	20
centrosome	9.97783	Cellular Component	18
mitochondrion	9.97783	Cellular Component	18
cytoskeleton	9.97783	Cellular Component	18
extracellular exosome	9.97783	Cellular Component	18
nucleoplasm	9.4235	Cellular Component	17
cytosol	8.86918	Cellular Component	16
Golgi apparatus	6.65188	Cellular Component	12
extracellular region	6.65188	Cellular Component	12
intracellular membrane-bounded organelle	6.09756	Cellular Component	11
intracellular	6.09756	Cellular Component	11
perinuclear region of cytoplasm	5.54324	Cellular Component	10
neuron projection	4.98891	Cellular Component	9
endoplasmic reticulum	4.98891	Cellular Component	9
transcription factor complex	4.43459	Cellular Component	8
nuclear speck	4.43459	Cellular Component	8
spindle	4.43459	Cellular Component	8
cell junction	3.88027	Cellular Component	7
neuromuscular junction	3.88027	Cellular Component	7
endosome	3.88027	Cellular Component	7
cleavage furrow	3.88027	Cellular Component	7
ubiquitin ligase complex	3.88027	Cellular Component	7
Atg1/ULK1 kinase complex	3.88027	Cellular Component	7
mitochondrial inner membrane	3.32594	Cellular Component	6
nucleolus	3.32594	Cellular Component	6
synaptic vesicle membrane	3.32594	Cellular Component	6
lysosome	3.32594	Cellular Component	6
spindle microtubule	3.32594	Cellular Component	6
mitochondrial outer membrane	2.77162	Cellular Component	5
extracellular matrix	2.77162	Cellular Component	5
focal adhesion	2.77162	Cellular Component	5
nucleosome	2.21729	Cellular Component	4
midbody	2.21729	Cellular Component	4
microtubule plus-end	2.21729	Cellular Component	4
cytoplasmic vesicle	2.21729	Cellular Component	4
kinesin complex	2.21729	Cellular Component	4
SNARE complex	2.21729	Cellular Component	4
spindle pole	2.21729	Cellular Component	4
vesicle	2.21729	Cellular Component	4
Golgi membrane	2.21729	Cellular Component	4
microtubule cytoskeleton	2.21729	Cellular Component	4
bicellular tight junction	2.21729	Cellular Component	4
extrinsic component of cytoplasmic side of plasma membrane	2.21729	Cellular Component	4
pericentriolar material	1.66297	Cellular Component	3
endocytic vesicle	1.66297	Cellular Component	3
retromer complex	1.66297	Cellular Component	3
cell-cell adherens junction	1.66297	Cellular Component	3
membrane coat	1.66297	Cellular Component	3
late endosome	1.66297	Cellular Component	3
centriole	1.66297	Cellular Component	3
ciliary basal body	1.66297	Cellular Component	3
recycling endosome membrane	1.66297	Cellular Component	3
endoplasmic reticulum membrane	1.66297	Cellular Component	3
gamma-tubulin ring complex	1.66297	Cellular Component	3
polytene chromosome	1.66297	Cellular Component	3
cell	1.10865	Cellular Component	2
peroxisomal matrix	1.10865	Cellular Component	2
I-kappaB/NF-kappaB complex	1.10865	Cellular Component	2
cytoplasmic stress granule	1.10865	Cellular Component	2
adherens junction	1.10865	Cellular Component	2
cell leading edge	1.10865	Cellular Component	2
lysosomal membrane	1.10865	Cellular Component	2
heterotrimeric G-protein complex	1.10865	Cellular Component	2
clathrin adaptor complex	1.10865	Cellular Component	2
MPP7-DLG1-LIN7 complex	1.10865	Cellular Component	2
P-body	1.10865	Cellular Component	2
actin cytoskeleton	1.10865	Cellular Component	2
PML body	1.10865	Cellular Component	2
basement membrane	1.10865	Cellular Component	2
peroxisome	1.10865	Cellular Component	2
integral component of Golgi membrane	1.10865	Cellular Component	2
autophagosome	1.10865	Cellular Component	2
synaptic vesicle	1.10865	Cellular Component	2
nuclear envelope	1.10865	Cellular Component	2
trans-Golgi network	1.10865	Cellular Component	2
microtubule	1.10865	Cellular Component	2
early endosome membrane	1.10865	Cellular Component	2
laminin-5 complex	0.554324	Cellular Component	1
phagophore assembly site	0.554324	Cellular Component	1
cell cortex	0.554324	Cellular Component	1
condensed nuclear chromosome	0.554324	Cellular Component	1
cell surface	0.554324	Cellular Component	1
calcium channel complex	0.554324	Cellular Component	1
early endosome	0.554324	Cellular Component	1
endosome membrane	0.554324	Cellular Component	1
transcription factor TFIID complex	0.554324	Cellular Component	1
gap junction	0.554324	Cellular Component	1
protein kinase 5 complex	0.554324	Cellular Component	1
postsynaptic membrane	0.554324	Cellular Component	1
Smc5-Smc6 complex	0.554324	Cellular Component	1
filopodium	0.554324	Cellular Component	1
Golgi stack	0.554324	Cellular Component	1
microvillus	0.554324	Cellular Component	1
late endosome membrane	0.554324	Cellular Component	1
ESCRT III complex	0.554324	Cellular Component	1
axon	0.554324	Cellular Component	1
PeBoW complex	0.554324	Cellular Component	1
melanosome	0.554324	Cellular Component	1
presynaptic membrane	0.554324	Cellular Component	1
NELF complex	0.554324	Cellular Component	1
cortical actin cytoskeleton	0.554324	Cellular Component	1
preribosome, large subunit precursor	0.554324	Cellular Component	1
autophagosome membrane	0.554324	Cellular Component	1
nuclear matrix	0.554324	Cellular Component	1
COPII vesicle coat	0.554324	Cellular Component	1
lamellipodium	0.554324	Cellular Component	1
postsynaptic density	0.554324	Cellular Component	1
brush border membrane	0.554324	Cellular Component	1
microtubule organizing center	0.554324	Cellular Component	1
Z disc	0.554324	Cellular Component	1
myosin complex	0.554324	Cellular Component	1
sarcomere	0.554324	Cellular Component	1
phosphatidylinositol 3-kinase complex	0.554324	Cellular Component	1
BRISC complex	0.554324	Cellular Component	1
anchored component of plasma membrane	0.554324	Cellular Component	1
synapse	0.554324	Cellular Component	1
growth cone	0.554324	Cellular Component	1
chromosome	0.554324	Cellular Component	1
SWI/SNF complex	0.554324	Cellular Component	1
NuRD complex	0.554324	Cellular Component	1
endoplasmic reticulum lumen	0.554324	Cellular Component	1
interstitial matrix	0.554324	Cellular Component	1
mitochondrial matrix	0.554324	Cellular Component	1
keratin filament	0.554324	Cellular Component	1
septin complex	0.554324	Cellular Component	1
membrane raft	0.554324	Cellular Component	1
collagen trimer	0.554324	Cellular Component	1
troponin complex	0.554324	Cellular Component	1
catenin complex	0.554324	Cellular Component	1
F-actin capping protein complex	0.554324	Cellular Component	1
connexin complex	0.554324	Cellular Component	1
transcriptional repressor complex	0.554324	Cellular Component	1
recycling endosome	0.554324	Cellular Component	1
desmosome	0.554324	Cellular Component	1
cilium	0.554324	Cellular Component	1
BRCA1-A complex	0.554324	Cellular Component	1
dendrite	0.554324	Cellular Component	1
extrinsic component of mitochondrial inner membrane	0.554324	Cellular Component	1
perikaryon	0.554324	Cellular Component	1
anchored component of membrane	0.554324	Cellular Component	1
caveola	0.554324	Cellular Component	1
neuronal cell body	0.554324	Cellular Component	1
integral component of mitochondrial outer membrane	0.554324	Cellular Component	1
metal ion binding	96.4523	Molecular Function	87
ATP binding	86.4745	Molecular Function	78
nucleotide binding	73.1707	Molecular Function	66
protein kinase activity	65.4102	Molecular Function	59
transferase activity	57.6497	Molecular Function	52
zinc ion binding	52.1064	Molecular Function	47
kinase activity	44.3459	Molecular Function	40
hydrolase activity	42.1286	Molecular Function	38
protein serine/threonine kinase activity	42.1286	Molecular Function	38
nucleic acid binding	39.9113	Molecular Function	36
calcium ion binding	36.5854	Molecular Function	33
DNA binding	36.5854	Molecular Function	33
DNA-binding transcription factor activity	36.5854	Molecular Function	33
protein binding	33.2594	Molecular Function	30
protein tyrosine phosphatase activity	29.9335	Molecular Function	27
DNA-binding transcription factor activity, RNA polymerase II-specific	25.4989	Molecular Function	23
phosphatase activity	23.2816	Molecular Function	21
sequence-specific DNA binding	22.1729	Molecular Function	20
RNA polymerase II regulatory region sequence-specific DNA binding	22.1729	Molecular Function	20
phosphoprotein phosphatase activity	21.0643	Molecular Function	19
protein dimerization activity	15.5211	Molecular Function	14
protein homodimerization activity	14.4124	Molecular Function	13
chromatin binding	14.4124	Molecular Function	13
protein tyrosine kinase activity	13.3038	Molecular Function	12
catalytic activity	13.3038	Molecular Function	12
magnesium ion binding	12.1951	Molecular Function	11
signaling receptor binding	11.0865	Molecular Function	10
RNA transmembrane transporter activity	11.0865	Molecular Function	10
transcription regulatory region DNA binding	9.97783	Molecular Function	9
ephrin receptor activity	9.97783	Molecular Function	9
peptidase activity	8.86918	Molecular Function	8
actin filament binding	8.86918	Molecular Function	8
GTP binding	8.86918	Molecular Function	8
miRNA binding	8.86918	Molecular Function	8
ubiquitin-protein transferase activity	8.86918	Molecular Function	8
metallopeptidase activity	7.76053	Molecular Function	7
DNA-binding transcription activator activity, RNA polymerase II-specific	7.76053	Molecular Function	7
core promoter sequence-specific DNA binding	7.76053	Molecular Function	7
oxidoreductase activity	7.76053	Molecular Function	7
RNA polymerase II transcription factor binding	7.76053	Molecular Function	7
calmodulin binding	7.76053	Molecular Function	7
protein kinase inhibitor activity	6.65188	Molecular Function	6
semaphorin receptor binding	6.65188	Molecular Function	6
chemorepellent activity	6.65188	Molecular Function	6
tau-protein kinase activity	6.65188	Molecular Function	6
protein tyrosine/serine/threonine phosphatase activity	6.65188	Molecular Function	6
neuropilin binding	6.65188	Molecular Function	6
guanosine-diphosphatase activity	6.65188	Molecular Function	6
uridine-diphosphatase activity	6.65188	Molecular Function	6
pyrophosphatase activity	6.65188	Molecular Function	6
deaminase activity	6.65188	Molecular Function	6
AMP deaminase activity	6.65188	Molecular Function	6
non-membrane spanning protein tyrosine kinase activity	6.65188	Molecular Function	6
ATP-dependent peptidase activity	5.54324	Molecular Function	5
integrin binding	5.54324	Molecular Function	5
metalloendopeptidase activity	5.54324	Molecular Function	5
elongation factor-2 kinase activity	5.54324	Molecular Function	5
ubiquitin conjugating enzyme binding	5.54324	Molecular Function	5
peptide binding	5.54324	Molecular Function	5
transferase activity, transferring acyl groups	5.54324	Molecular Function	5
serine-type peptidase activity	5.54324	Molecular Function	5
actin binding	5.54324	Molecular Function	5
translation elongation factor activity	5.54324	Molecular Function	5
serine-type endopeptidase activity	5.54324	Molecular Function	5
transcription coregulator activity	5.54324	Molecular Function	5
ubiquitin-like protein binding	5.54324	Molecular Function	5
RNA polymerase II proximal promoter sequence-specific DNA binding	5.54324	Molecular Function	5
cysteine-type endopeptidase activity involved in apoptotic process	5.54324	Molecular Function	5
cullin family protein binding	5.54324	Molecular Function	5
protein heterodimerization activity	5.54324	Molecular Function	5
ligase activity	4.43459	Molecular Function	4
myosin binding	4.43459	Molecular Function	4
neurotransmitter:sodium symporter activity	4.43459	Molecular Function	4
methyltransferase activity	4.43459	Molecular Function	4
GTPase activator activity	4.43459	Molecular Function	4
structural molecule activity	4.43459	Molecular Function	4
SNAP receptor activity	4.43459	Molecular Function	4
Rab GTPase binding	4.43459	Molecular Function	4
manganese ion binding	4.43459	Molecular Function	4
symporter activity	4.43459	Molecular Function	4
double-stranded RNA binding	4.43459	Molecular Function	4
4 iron, 4 sulfur cluster binding	4.43459	Molecular Function	4
GTPase activity	4.43459	Molecular Function	4
frizzled binding	4.43459	Molecular Function	4
RNA binding	4.43459	Molecular Function	4
nucleoside transmembrane transporter activity	4.43459	Molecular Function	4
DNA-methyltransferase activity	4.43459	Molecular Function	4
hormone binding	4.43459	Molecular Function	4
microtubule motor activity	4.43459	Molecular Function	4
AP-1 adaptor complex binding	4.43459	Molecular Function	4
syntaxin binding	4.43459	Molecular Function	4
protein domain specific binding	4.43459	Molecular Function	4
enhancer binding	4.43459	Molecular Function	4
carbonate dehydratase activity	4.43459	Molecular Function	4
gamma-aminobutyric acid:sodium symporter activity	4.43459	Molecular Function	4
steroid hormone receptor activity	4.43459	Molecular Function	4
transferase activity, transferring glycosyl groups	3.32594	Molecular Function	3
serine-type endopeptidase inhibitor activity	3.32594	Molecular Function	3
phosphatidylinositol-3,4-bisphosphate 3-phosphatase activity	3.32594	Molecular Function	3
protein-glycine ligase activity, initiating	3.32594	Molecular Function	3
myosin light chain kinase activity	3.32594	Molecular Function	3
protein-cysteine S-palmitoyltransferase activity	3.32594	Molecular Function	3
protein serine/threonine kinase activator activity	3.32594	Molecular Function	3
protein-glycine ligase activity	3.32594	Molecular Function	3
protein kinase activator activity	3.32594	Molecular Function	3
protein-glutamic acid ligase activity	3.32594	Molecular Function	3
tubulin-glycine ligase activity	3.32594	Molecular Function	3
tubulin-glutamic acid ligase activity	3.32594	Molecular Function	3
ADP-ribosylation factor binding	3.32594	Molecular Function	3
NAD+ ADP-ribosyltransferase activity	3.32594	Molecular Function	3
PDZ domain binding	3.32594	Molecular Function	3
collagen binding	3.32594	Molecular Function	3
lyase activity	3.32594	Molecular Function	3
coenzyme F420-0 gamma-glutamyl ligase activity	3.32594	Molecular Function	3
enhancer sequence-specific DNA binding	3.32594	Molecular Function	3
UDP-N-acetylmuramoylalanyl-D-glutamyl-2,6-diaminopimelate-D-alanyl-D-alanine ligase activity	3.32594	Molecular Function	3
aconitate hydratase activity	3.32594	Molecular Function	3
lipid phosphatase activity	3.32594	Molecular Function	3
NADPH-hemoprotein reductase activity	3.32594	Molecular Function	3
protein kinase binding	3.32594	Molecular Function	3
coenzyme F420-2 alpha-glutamyl ligase activity	3.32594	Molecular Function	3
kinase binding	3.32594	Molecular Function	3
aminopeptidase activity	3.32594	Molecular Function	3
[methionine synthase] reductase activity	3.32594	Molecular Function	3
phosphatidylinositol-3,4,5-trisphosphate 3-phosphatase activity	3.32594	Molecular Function	3
ribosomal S6-glutamic acid ligase activity	3.32594	Molecular Function	3
LIM domain binding	3.32594	Molecular Function	3
heparin binding	3.32594	Molecular Function	3
pyridoxal phosphate binding	3.32594	Molecular Function	3
CARD domain binding	3.32594	Molecular Function	3
protein-glycine ligase activity, elongating	3.32594	Molecular Function	3
MAP kinase tyrosine/serine/threonine phosphatase activity	3.32594	Molecular Function	3
cell adhesion molecule binding	3.32594	Molecular Function	3
mRNA 3'-UTR binding	3.32594	Molecular Function	3
iron-sulfur cluster binding	3.32594	Molecular Function	3
double-stranded DNA binding	2.21729	Molecular Function	2
acylglycerol O-acyltransferase activity	2.21729	Molecular Function	2
SMAD binding	2.21729	Molecular Function	2
butyryl-CoA 2-C-propionyltransferase activity	2.21729	Molecular Function	2
Ras palmitoyltransferase activity	2.21729	Molecular Function	2
lipid binding	2.21729	Molecular Function	2
histone deacetylase binding	2.21729	Molecular Function	2
2,4,4-trimethyl-3-oxopentanoyl-CoA 2-C-propanoyl transferase activity	2.21729	Molecular Function	2
keto acid formate lyase activity	2.21729	Molecular Function	2
amino acid binding	2.21729	Molecular Function	2
protein-arginine deiminase activity	2.21729	Molecular Function	2
palmitoleoyl [acyl-carrier-protein]-dependent acyltransferase activity	2.21729	Molecular Function	2
proline-rich region binding	2.21729	Molecular Function	2
acetyltransferase activity	2.21729	Molecular Function	2
N-acyltransferase activity	2.21729	Molecular Function	2
L-glutamate transmembrane transporter activity	2.21729	Molecular Function	2
O-palmitoyltransferase activity	2.21729	Molecular Function	2
acid phosphatase activity	2.21729	Molecular Function	2
2,6-dimethyl-5-methylene-3-oxo-heptanoyl-CoA C-acetyltransferase activity	2.21729	Molecular Function	2
N-succinyltransferase activity	2.21729	Molecular Function	2
O-acyltransferase activity	2.21729	Molecular Function	2
hydrolase activity, hydrolyzing O-glycosyl compounds	2.21729	Molecular Function	2
lanosterol O-acyltransferase activity	2.21729	Molecular Function	2
S-acetyltransferase activity	2.21729	Molecular Function	2
transmembrane signaling receptor activity	2.21729	Molecular Function	2
N-acetyltransferase activity	2.21729	Molecular Function	2
transporter activity	2.21729	Molecular Function	2
guanyl-nucleotide exchange factor activity	2.21729	Molecular Function	2
S-malonyltransferase activity	2.21729	Molecular Function	2
L-2-aminoadipate N-acetyltransferase activity	2.21729	Molecular Function	2
N-palmitoyltransferase activity	2.21729	Molecular Function	2
hydrolase activity, acting on glycosyl bonds	2.21729	Molecular Function	2
protein-cysteine S-myristoyltransferase activity	2.21729	Molecular Function	2
insulin-like growth factor binding	2.21729	Molecular Function	2
3-hydroxybutyryl-CoA thiolase activity	2.21729	Molecular Function	2
protein C-terminus binding	2.21729	Molecular Function	2
mitogen-activated protein kinase binding	2.21729	Molecular Function	2
acyl-CoA N-acyltransferase activity	2.21729	Molecular Function	2
C-acyltransferase activity	2.21729	Molecular Function	2
G-protein beta/gamma-subunit complex binding	2.21729	Molecular Function	2
voltage-gated anion channel activity	2.21729	Molecular Function	2
acetyl-CoA:L-lysine N6-acetyltransferase	2.21729	Molecular Function	2
O-succinyltransferase activity	2.21729	Molecular Function	2
dihydrolipoamide S-acyltransferase activity	2.21729	Molecular Function	2
proline dehydrogenase activity	2.21729	Molecular Function	2
cholesterol binding	2.21729	Molecular Function	2
SNARE binding	2.21729	Molecular Function	2
O-sinapoyltransferase activity	2.21729	Molecular Function	2
malonyltransferase activity	2.21729	Molecular Function	2
S-acyltransferase activity	2.21729	Molecular Function	2
SH3 domain binding	2.21729	Molecular Function	2
cysteine-type peptidase activity	2.21729	Molecular Function	2
protein-cysteine S-acyltransferase activity	2.21729	Molecular Function	2
peptidyl-lysine acetyltransferase activity	2.21729	Molecular Function	2
benzoyl acetate-CoA thiolase activity	2.21729	Molecular Function	2
peptidyl-lysine N6-palmitoyltransferase activity	2.21729	Molecular Function	2
carnitine O-acyltransferase activity	2.21729	Molecular Function	2
palmitoyltransferase activity	2.21729	Molecular Function	2
sterol O-acyltransferase activity	2.21729	Molecular Function	2
FAD binding	2.21729	Molecular Function	2
2-methylhexanoyl-CoA C-acetyltransferase activity	2.21729	Molecular Function	2
single-stranded RNA binding	2.21729	Molecular Function	2
naphthyl-2-oxomethyl-succinyl-CoA succinyl transferase activity	2.21729	Molecular Function	2
octanoyltransferase activity	2.21729	Molecular Function	2
ergosterol O-acyltransferase activity	2.21729	Molecular Function	2
ephrin receptor binding	2.21729	Molecular Function	2
cysteine-type endopeptidase activity	2.21729	Molecular Function	2
S-succinyltransferase activity	2.21729	Molecular Function	2
sinapoyltransferase activity	2.21729	Molecular Function	2
glucosaminyl-phosphotidylinositol O-acyltransferase activity	2.21729	Molecular Function	2
carbohydrate binding	2.21729	Molecular Function	2
peptidyl-lysine N6-myristoyltransferase activity	2.21729	Molecular Function	2
azetidine-2-carboxylic acid acetyltransferase activity	2.21729	Molecular Function	2
cysteine-type endopeptidase activator activity involved in apoptotic process	2.21729	Molecular Function	2
amyloid-beta binding	2.21729	Molecular Function	2
dihydrolipoamide branched chain acyltransferase activity	2.21729	Molecular Function	2
myristoyltransferase activity	2.21729	Molecular Function	2
O-octanoyltransferase activity	2.21729	Molecular Function	2
C-palmitoyltransferase activity	2.21729	Molecular Function	2
succinyltransferase activity	2.21729	Molecular Function	2
inositol-1,4-bisphosphate 1-phosphatase activity	2.21729	Molecular Function	2
O-acetyltransferase activity	2.21729	Molecular Function	2
serine O-acyltransferase activity	2.21729	Molecular Function	2
oxidoreductase activity, acting on the CH-OH group of donors, NAD or NADP as acceptor	2.21729	Molecular Function	2
3-ketopimelyl-CoA thiolase activity	2.21729	Molecular Function	2
pheromone receptor activity	2.21729	Molecular Function	2
armadillo repeat domain binding	1.10865	Molecular Function	1
phosphatidylinositol binding	1.10865	Molecular Function	1
didemethylisoproturon amidohydrolase activity	1.10865	Molecular Function	1
protein phosphatase activator activity	1.10865	Molecular Function	1
epoxyqueuosine reductase activity	1.10865	Molecular Function	1
lipid transporter activity	1.10865	Molecular Function	1
cytokine receptor activity	1.10865	Molecular Function	1
ion transmembrane transporter activity	1.10865	Molecular Function	1
2-methylhex-2-enoyl-CoA hydratase activity	1.10865	Molecular Function	1
ADP-dependent NAD(P)H-hydrate dehydratase activity	1.10865	Molecular Function	1
heme binding	1.10865	Molecular Function	1
ammonium transmembrane transporter activity	1.10865	Molecular Function	1
glycogen phosphorylase activity	1.10865	Molecular Function	1
2-hydroxyisobutyrate dehydratase activity	1.10865	Molecular Function	1
2-hydroxydec-2,4-diene-1,10-dioate hydratase activity	1.10865	Molecular Function	1
translation initiation factor activity	1.10865	Molecular Function	1
keratin filament binding	1.10865	Molecular Function	1
peroxidase activity	1.10865	Molecular Function	1
asparagine synthase (glutamine-hydrolyzing) activity	1.10865	Molecular Function	1
alpha-galactosidase activity	1.10865	Molecular Function	1
cyclin-dependent protein serine/threonine kinase activity	1.10865	Molecular Function	1
N-terminal myristoylation domain binding	1.10865	Molecular Function	1
calcium-dependent protein serine/threonine kinase activity	1.10865	Molecular Function	1
hormone activity	1.10865	Molecular Function	1
epidermal growth factor receptor binding	1.10865	Molecular Function	1
3-dehydroshikimate dehydratase activity	1.10865	Molecular Function	1
protein kinase C binding	1.10865	Molecular Function	1
sphingosine N-acyltransferase activity	1.10865	Molecular Function	1
N-acetylcitrulline deacetylase activity	1.10865	Molecular Function	1
starch alpha-glucosidase activity	1.10865	Molecular Function	1
protein phosphatase 2A binding	1.10865	Molecular Function	1
estrogen receptor binding	1.10865	Molecular Function	1
nucleotidyltransferase activity	1.10865	Molecular Function	1
beta-glucuronidase activity	1.10865	Molecular Function	1
transmembrane transporter activity	1.10865	Molecular Function	1
ion channel activity	1.10865	Molecular Function	1
L-serine hydro-lyase (adding indole, L-tryptophan-forming) activity	1.10865	Molecular Function	1
heparan sulfate proteoglycan binding	1.10865	Molecular Function	1
growth factor binding	1.10865	Molecular Function	1
titin binding	1.10865	Molecular Function	1
galactosidase activity	1.10865	Molecular Function	1
tumor necrosis factor receptor binding	1.10865	Molecular Function	1
N-acetylgalactosamine-6-phosphate deacetylase activity	1.10865	Molecular Function	1
hexosaminidase activity	1.10865	Molecular Function	1
mannosyl-oligosaccharide mannosidase activity	1.10865	Molecular Function	1
glucan endo-1,4-beta-glucosidase activity	1.10865	Molecular Function	1
p53 binding	1.10865	Molecular Function	1
reduced coenzyme F420 dehydrogenase activity	1.10865	Molecular Function	1
2-oxo-hept-3-ene-1,7-dioate hydratase activity	1.10865	Molecular Function	1
stem cell factor receptor binding	1.10865	Molecular Function	1
epidermal growth factor-activated receptor activity	1.10865	Molecular Function	1
menth-2-enone hydratase activity	1.10865	Molecular Function	1
MHC class II protein binding	1.10865	Molecular Function	1
isocitrate dehydrogenase (NAD+) activity	1.10865	Molecular Function	1
1-phosphatidylinositol-3-kinase regulator activity	1.10865	Molecular Function	1
indoleacetamide hydrolase activity	1.10865	Molecular Function	1
GTPase regulator activity	1.10865	Molecular Function	1
glyoxalase III activity	1.10865	Molecular Function	1
phosphatase inhibitor activity	1.10865	Molecular Function	1
4-methyloct-2-enoyl-CoA hydratase activity	1.10865	Molecular Function	1
protein serine/threonine phosphatase activity	1.10865	Molecular Function	1
SH3/SH2 adaptor activity	1.10865	Molecular Function	1
phosphorylase activity	1.10865	Molecular Function	1
ubiquitin protein ligase activity	1.10865	Molecular Function	1
O-succinylbenzoate synthase activity	1.10865	Molecular Function	1
3-hydroxypropionyl-CoA dehydratase activity	1.10865	Molecular Function	1
2-keto-3-deoxygalactonate aldolase activity	1.10865	Molecular Function	1
amino acid transmembrane transporter activity	1.10865	Molecular Function	1
cis-aconitamide amidase activity	1.10865	Molecular Function	1
(3R)-hydroxymyristoyl-[acyl-carrier-protein] dehydratase activity	1.10865	Molecular Function	1
L-aspartate transmembrane transporter activity	1.10865	Molecular Function	1
N-ethylmaleimide reductase activity	1.10865	Molecular Function	1
2-hydroxyhexa-2,4-dienoate hydratase activity	1.10865	Molecular Function	1
semaphorin receptor activity	1.10865	Molecular Function	1
L-erythro-3-methylmalyl-CoA dehydratase activity	1.10865	Molecular Function	1
N-cyclohexylformamide amidohydrolase activity	1.10865	Molecular Function	1
molybdenum ion binding	1.10865	Molecular Function	1
ErbB-2 class receptor binding	1.10865	Molecular Function	1
ErbB-3 class receptor binding	1.10865	Molecular Function	1
growth factor activity	1.10865	Molecular Function	1
G-protein alpha-subunit binding	1.10865	Molecular Function	1
L-serine transmembrane transporter activity	1.10865	Molecular Function	1
iprodione amidohydrolase activity	1.10865	Molecular Function	1
DNA binding, bending	1.10865	Molecular Function	1
biotin carboxylase activity	1.10865	Molecular Function	1
mitogen-activated protein kinase kinase kinase binding	1.10865	Molecular Function	1
6-carboxy-5,6,7,8-tetrahydropterin synthase activity	1.10865	Molecular Function	1
pyruvate kinase activity	1.10865	Molecular Function	1
motor activity	1.10865	Molecular Function	1
ribose phosphate diphosphokinase activity	1.10865	Molecular Function	1
2-keto-3-deoxygluconate aldolase activity	1.10865	Molecular Function	1
Hsp90 protein binding	1.10865	Molecular Function	1
ubiquitin binding	1.10865	Molecular Function	1
thiol-dependent ubiquitinyl hydrolase activity	1.10865	Molecular Function	1
beta-glucanase activity	1.10865	Molecular Function	1
protein-N-terminal asparagine amidohydrolase activity	1.10865	Molecular Function	1
beta-6-sulfate-N-acetylglucosaminidase activity	1.10865	Molecular Function	1
TPR domain binding	1.10865	Molecular Function	1
E-phenylitaconyl-CoA hydratase activity	1.10865	Molecular Function	1
thioesterase binding	1.10865	Molecular Function	1
cation binding	1.10865	Molecular Function	1
calmodulin-dependent protein kinase activity	1.10865	Molecular Function	1
transcription coactivator activity	1.10865	Molecular Function	1
MAP kinase kinase kinase activity	1.10865	Molecular Function	1
NADPH:sulfur oxidoreductase activity	1.10865	Molecular Function	1
UDP-3-O-[3-hydroxymyristoyl] N-acetylglucosamine deacetylase activity	1.10865	Molecular Function	1
mannosidase activity	1.10865	Molecular Function	1
vascular endothelial growth factor-activated receptor activity	1.10865	Molecular Function	1
glucosamine-6-phosphate deaminase activity	1.10865	Molecular Function	1
polyubiquitin modification-dependent protein binding	1.10865	Molecular Function	1
(3,5-dichlorophenylurea)acetate amidohydrolase activity	1.10865	Molecular Function	1
deoxyribonuclease II activity	1.10865	Molecular Function	1
G protein-coupled receptor activity	1.10865	Molecular Function	1
trans-o-hydroxybenzylidenepyruvate hydratase-aldolase activity	1.10865	Molecular Function	1
acetylenecarboxylate hydratase activity, producing 3-hydroxypropenoate	1.10865	Molecular Function	1
lytic transglycosylase activity	1.10865	Molecular Function	1
G protein-coupled receptor binding	1.10865	Molecular Function	1
2,4,4-trimethylpent-2-enoyl-CoA hydratase activity	1.10865	Molecular Function	1
acyl-CoA hydrolase activity	1.10865	Molecular Function	1
GTP-Rho binding	1.10865	Molecular Function	1
mitogen-activated protein kinase kinase binding	1.10865	Molecular Function	1
tumor necrosis factor-activated receptor activity	1.10865	Molecular Function	1
3-hydroxyacyl-CoA dehydratase activity	1.10865	Molecular Function	1
biotin binding	1.10865	Molecular Function	1
trehalase activity	1.10865	Molecular Function	1
diacetylchitobiose deacetylase activity	1.10865	Molecular Function	1
transcription corepressor activity	1.10865	Molecular Function	1
glucosidase activity	1.10865	Molecular Function	1
beta-catenin binding	1.10865	Molecular Function	1
alpha-mannosidase activity	1.10865	Molecular Function	1
ubiquitin protein ligase binding	1.10865	Molecular Function	1
N-isopropylacetanilide amidohydrolase activity	1.10865	Molecular Function	1
2 iron, 2 sulfur cluster binding	1.10865	Molecular Function	1
potassium ion binding	1.10865	Molecular Function	1
prostaglandin-endoperoxide synthase activity	1.10865	Molecular Function	1
amylase activity	1.10865	Molecular Function	1
Hsp70 protein binding	1.10865	Molecular Function	1
ferrous iron binding	1.10865	Molecular Function	1
sulfur oxygenase reductase activity	1.10865	Molecular Function	1
Rac GTPase binding	1.10865	Molecular Function	1
D5 dopamine receptor binding	1.10865	Molecular Function	1
pyruvate carboxylase activity	1.10865	Molecular Function	1
ATPase-coupled transmembrane transporter activity	1.10865	Molecular Function	1
fucosidase activity	1.10865	Molecular Function	1
bis(5'-adenosyl)-triphosphatase activity	1.10865	Molecular Function	1
JUN kinase kinase kinase activity	1.10865	Molecular Function	1
identical protein binding	1.10865	Molecular Function	1
thiol-dependent ubiquitin-specific protease activity	1.10865	Molecular Function	1
cytoskeletal protein binding	1.10865	Molecular Function	1
trans-4-[2-(3-hydroxy)-thionaphthenyl]-2-oxo-3-butenoate hydratase activity	1.10865	Molecular Function	1
mRNA binding	1.10865	Molecular Function	1
phospholipase binding	1.10865	Molecular Function	1
flavin adenine dinucleotide binding	1.10865	Molecular Function	1
mannosyltransferase activity	1.10865	Molecular Function	1
trans-4-(1'-hydroxynaphth-2'-yl)-2-oxobut-3-enoate hydratase-aldolase activity	1.10865	Molecular Function	1
endosulfan diol hydrolyase (cyclizing) activity	1.10865	Molecular Function	1
isonicotinic acid hydrazide hydrolase activity	1.10865	Molecular Function	1
malolactic enzyme activity	1.10865	Molecular Function	1
1,2-bis(4-hydroxyphenyl)-2-proponol dehydratase activity	1.10865	Molecular Function	1
limonene 8-hydratase activity	1.10865	Molecular Function	1
ubiquitin conjugating enzyme activity	1.10865	Molecular Function	1
gamma-catenin binding	1.10865	Molecular Function	1
ion channel binding	1.10865	Molecular Function	1
enzyme activator activity	1.10865	Molecular Function	1
monooxygenase activity	1.10865	Molecular Function	1
iron-sulfur transferase activity	1.10865	Molecular Function	1
perillyl-CoA hydratase activity	1.10865	Molecular Function	1
sepiapterin reductase activity	1.10865	Molecular Function	1
3-methyl-5-hydroxy-6-(3-carboxy-3-oxopropenyl)-1H-2-pyridon hydratase-aldolase activity	1.10865	Molecular Function	1
NAD binding	1.10865	Molecular Function	1
dextrin alpha-glucosidase activity	1.10865	Molecular Function	1
type 1 angiotensin receptor binding	1.10865	Molecular Function	1
naphthyl-2-methylene-succinyl-CoA lyase activity	1.10865	Molecular Function	1
receptor tyrosine kinase binding	1.10865	Molecular Function	1
transcription factor binding	1.10865	Molecular Function	1
5-chloro-2-oxopent-4-enoate hydratase activity	1.10865	Molecular Function	1
cyclohex-1-ene-1-carboxyl-CoA hydratase activity	1.10865	Molecular Function	1
cytokine activity	1.10865	Molecular Function	1
N2-acetyl-L-lysine deacetylase activity	1.10865	Molecular Function	1
calcium channel activity	1.10865	Molecular Function	1
gamma-N-formylaminovinylacetate hydrolase activity	1.10865	Molecular Function	1
microtubule-severing ATPase activity	1.10865	Molecular Function	1
ubiquitin-like protein ligase binding	1.10865	Molecular Function	1
nuclear receptor activity	1.10865	Molecular Function	1
4'-(2-hydroxyisopropyl)phenylurea amidohydrolase activity	1.10865	Molecular Function	1
store-operated calcium channel activity	1.10865	Molecular Function	1
chitooligosaccharide deacetylase activity	1.10865	Molecular Function	1
calcium-dependent cysteine-type endopeptidase activity	1.10865	Molecular Function	1
6-hydroxycyclohex-1-ene-1-carboxyl-CoA hydratase activity	1.10865	Molecular Function	1
structural constituent of ribosome	1.10865	Molecular Function	1
acetylcholine receptor activator activity	1.10865	Molecular Function	1

## Sheet: Cluster 17
GO_term	Percent	Function	Count
phosphorylation	95.3535	Biological Process	59
signal transduction	93.7374	Biological Process	58
regulation of transcription, DNA-templated	87.2727	Biological Process	54
protein phosphorylation	82.4242	Biological Process	51
heart development	79.1919	Biological Process	49
cell morphogenesis	69.4949	Biological Process	43
positive regulation of transcription by RNA polymerase II	66.2626	Biological Process	41
actin filament reorganization	64.6465	Biological Process	40
neuron projection development	64.6465	Biological Process	40
transport	54.9495	Biological Process	34
transcription, DNA-templated	53.3333	Biological Process	33
protein ubiquitination	50.101	Biological Process	31
ubiquitin-dependent protein catabolic process	48.4848	Biological Process	30
dephosphorylation	40.404	Biological Process	25
protein deubiquitination	40.404	Biological Process	25
multicellular organism development	40.404	Biological Process	25
metabolic process	37.1717	Biological Process	23
regulation of transcription by RNA polymerase II	37.1717	Biological Process	23
intracellular signal transduction	33.9394	Biological Process	21
oxidation-reduction process	33.9394	Biological Process	21
protein dephosphorylation	32.3232	Biological Process	20
cell adhesion	32.3232	Biological Process	20
axon extension	30.7071	Biological Process	19
central nervous system development	30.7071	Biological Process	19
regulation of cell population proliferation	27.4747	Biological Process	17
cell differentiation	27.4747	Biological Process	17
proteolysis	27.4747	Biological Process	17
negative regulation of transcription by RNA polymerase II	27.4747	Biological Process	17
intracellular protein transport	27.4747	Biological Process	17
cell cycle	27.4747	Biological Process	17
transmembrane transport	27.4747	Biological Process	17
regulation of cell cycle	25.8586	Biological Process	16
endocytosis	25.8586	Biological Process	16
small GTPase mediated signal transduction	25.8586	Biological Process	16
actomyosin structure organization	24.2424	Biological Process	15
nervous system development	24.2424	Biological Process	15
embryonic viscerocranium morphogenesis	22.6263	Biological Process	14
apoptotic process	22.6263	Biological Process	14
lipid metabolic process	21.0101	Biological Process	13
innate immune response	21.0101	Biological Process	13
ubiquitin-dependent ERAD pathway	21.0101	Biological Process	13
brain development	21.0101	Biological Process	13
translation	21.0101	Biological Process	13
peptidyl-tyrosine autophosphorylation	21.0101	Biological Process	13
positive regulation of GTPase activity	21.0101	Biological Process	13
methylation	21.0101	Biological Process	13
regulation of cell shape	21.0101	Biological Process	13
chromatin remodeling	19.3939	Biological Process	12
regulation of cell migration	19.3939	Biological Process	12
regulation of small GTPase mediated signal transduction	19.3939	Biological Process	12
cellular response to UV	19.3939	Biological Process	12
central nervous system morphogenesis	19.3939	Biological Process	12
anterior/posterior pattern specification	19.3939	Biological Process	12
neural crest cell migration	19.3939	Biological Process	12
vesicle-mediated transport	19.3939	Biological Process	12
regulation of vesicle fusion	19.3939	Biological Process	12
positive regulation of axonogenesis	17.7778	Biological Process	11
negative regulation of cell adhesion	17.7778	Biological Process	11
regulation of GTPase activity	17.7778	Biological Process	11
semaphorin-plexin signaling pathway involved in axon guidance	17.7778	Biological Process	11
transmembrane receptor protein tyrosine kinase signaling pathway	17.7778	Biological Process	11
epidermal growth factor receptor signaling pathway	17.7778	Biological Process	11
negative regulation of transcription, DNA-templated	17.7778	Biological Process	11
cell migration	17.7778	Biological Process	11
posterior lateral line neuromast primordium migration	17.7778	Biological Process	11
dorsal/ventral pattern formation	16.1616	Biological Process	10
cytoplasmic mRNA processing body assembly	16.1616	Biological Process	10
cellular response to DNA damage stimulus	16.1616	Biological Process	10
positive regulation of transcription, DNA-templated	16.1616	Biological Process	10
platelet-derived growth factor receptor signaling pathway	16.1616	Biological Process	10
actin cytoskeleton organization	16.1616	Biological Process	10
homophilic cell adhesion via plasma membrane adhesion molecules	16.1616	Biological Process	10
chordate embryonic development	14.5455	Biological Process	9
autophagy	14.5455	Biological Process	9
clathrin-dependent endocytosis	12.9293	Biological Process	8
protein localization to plasma membrane	12.9293	Biological Process	8
carbohydrate metabolic process	12.9293	Biological Process	8
clathrin coat assembly	12.9293	Biological Process	8
convergent extension	12.9293	Biological Process	8
heme biosynthetic process	12.9293	Biological Process	8
glycolytic process	12.9293	Biological Process	8
positive regulation of DNA-binding transcription factor activity	12.9293	Biological Process	8
skeletal muscle fiber development	12.9293	Biological Process	8
microtubule-based movement	12.9293	Biological Process	8
embryonic cranial skeleton morphogenesis	12.9293	Biological Process	8
fin regeneration	12.9293	Biological Process	8
hemoglobin biosynthetic process	12.9293	Biological Process	8
membrane invagination	12.9293	Biological Process	8
mitotic cell cycle	12.9293	Biological Process	8
sodium-independent organic anion transport	12.9293	Biological Process	8
bile acid and bile salt transport	12.9293	Biological Process	8
mitotic spindle midzone assembly	11.3131	Biological Process	7
negative regulation of insulin secretion	11.3131	Biological Process	7
response to calcium ion	11.3131	Biological Process	7
positive regulation of I-kappaB kinase/NF-kappaB signaling	11.3131	Biological Process	7
detection of mechanical stimulus	11.3131	Biological Process	7
defense response to virus	11.3131	Biological Process	7
transition between fast and slow fiber	11.3131	Biological Process	7
cardiac muscle hypertrophy in response to stress	11.3131	Biological Process	7
hemoglobin metabolic process	11.3131	Biological Process	7
excitatory postsynaptic potential	11.3131	Biological Process	7
negative regulation of monocyte differentiation	11.3131	Biological Process	7
apical protein localization	11.3131	Biological Process	7
G1/S transition of mitotic cell cycle	11.3131	Biological Process	7
angiogenesis	11.3131	Biological Process	7
positive regulation of type I interferon-mediated signaling pathway	11.3131	Biological Process	7
enteric nervous system development	11.3131	Biological Process	7
cellular response to drug	11.3131	Biological Process	7
cellular response to glucose stimulus	11.3131	Biological Process	7
negative regulation of integrin-mediated signaling pathway	11.3131	Biological Process	7
calcium ion transport	11.3131	Biological Process	7
multicellular organismal homeostasis	11.3131	Biological Process	7
positive regulation of ERK1 and ERK2 cascade	11.3131	Biological Process	7
protein import into nucleus	11.3131	Biological Process	7
neural tube closure	11.3131	Biological Process	7
erythrocyte differentiation	11.3131	Biological Process	7
regulation of Rho protein signal transduction	11.3131	Biological Process	7
negative regulation of dendrite morphogenesis	11.3131	Biological Process	7
glomerulus development	11.3131	Biological Process	7
negative regulation of chromatin binding	11.3131	Biological Process	7
water homeostasis	11.3131	Biological Process	7
mitotic cell cycle arrest	11.3131	Biological Process	7
negative regulation of leukocyte migration	11.3131	Biological Process	7
retina layer formation	11.3131	Biological Process	7
calcium-mediated signaling	11.3131	Biological Process	7
negative regulation of keratinocyte differentiation	11.3131	Biological Process	7
positive regulation of cardiac muscle hypertrophy in response to stress	11.3131	Biological Process	7
histone H3-K4 methylation	11.3131	Biological Process	7
phosphatidylinositol metabolic process	11.3131	Biological Process	7
blood vessel development	11.3131	Biological Process	7
calcineurin-NFAT signaling cascade	11.3131	Biological Process	7
Rho protein signal transduction	11.3131	Biological Process	7
closure of optic fissure	11.3131	Biological Process	7
multicellular organismal response to stress	11.3131	Biological Process	7
camera-type eye photoreceptor cell differentiation	11.3131	Biological Process	7
regulation of exit from mitosis	11.3131	Biological Process	7
stem cell differentiation	11.3131	Biological Process	7
G protein-coupled receptor signaling pathway	11.3131	Biological Process	7
embryonic skeletal system morphogenesis	11.3131	Biological Process	7
negative regulation of cell-matrix adhesion	11.3131	Biological Process	7
cytoskeleton-dependent intracellular transport	11.3131	Biological Process	7
regulation of neuron differentiation	11.3131	Biological Process	7
response to yeast	11.3131	Biological Process	7
RIG-I signaling pathway	11.3131	Biological Process	7
modulation of chemical synaptic transmission	11.3131	Biological Process	7
cell cycle arrest	9.69697	Biological Process	6
myoblast fusion	9.69697	Biological Process	6
regulation of vascular permeability	9.69697	Biological Process	6
positive regulation of epidermal growth factor-activated receptor activity	9.69697	Biological Process	6
chondrocyte intercalation involved in growth plate cartilage morphogenesis	9.69697	Biological Process	6
negative regulation of JUN kinase activity	9.69697	Biological Process	6
response to X-ray	9.69697	Biological Process	6
DNA repair	9.69697	Biological Process	6
Wnt signaling pathway	9.69697	Biological Process	6
visual learning	9.69697	Biological Process	6
proteasome-mediated ubiquitin-dependent protein catabolic process	9.69697	Biological Process	6
transport along microtubule	9.69697	Biological Process	6
neuron fate commitment	9.69697	Biological Process	6
response to gamma radiation	9.69697	Biological Process	6
dendritic spine maintenance	9.69697	Biological Process	6
lipid catabolic process	9.69697	Biological Process	6
mitotic G1 DNA damage checkpoint	9.69697	Biological Process	6
glomerular basement membrane development	9.69697	Biological Process	6
ion transport	9.69697	Biological Process	6
positive regulation of cell migration	9.69697	Biological Process	6
retrograde transport, endosome to Golgi	9.69697	Biological Process	6
negative regulation of DNA endoreduplication	9.69697	Biological Process	6
positive regulation of oxidative stress-induced neuron intrinsic apoptotic signaling pathway	9.69697	Biological Process	6
response to copper ion	9.69697	Biological Process	6
negative regulation of neuron apoptotic process	9.69697	Biological Process	6
bone resorption	9.69697	Biological Process	6
extracellular matrix organization	9.69697	Biological Process	6
retina morphogenesis in camera-type eye	9.69697	Biological Process	6
negative regulation of intrinsic apoptotic signaling pathway	9.69697	Biological Process	6
positive regulation of ubiquitin-dependent protein catabolic process	9.69697	Biological Process	6
positive regulation of proteasomal protein catabolic process	9.69697	Biological Process	6
histone H3 acetylation	9.69697	Biological Process	6
sister chromatid cohesion	9.69697	Biological Process	6
SCF-dependent proteasomal ubiquitin-dependent protein catabolic process	9.69697	Biological Process	6
DNA damage response, signal transduction by p53 class mediator resulting in transcription of p21 class mediator	9.69697	Biological Process	6
hemopoiesis	9.69697	Biological Process	6
protein tetramerization	9.69697	Biological Process	6
progesterone receptor signaling pathway	9.69697	Biological Process	6
positive regulation of actin filament bundle assembly	9.69697	Biological Process	6
osteoclast development	9.69697	Biological Process	6
regulation of podosome assembly	9.69697	Biological Process	6
protein stabilization	9.69697	Biological Process	6
negative regulation of extrinsic apoptotic signaling pathway	9.69697	Biological Process	6
intracellular estrogen receptor signaling pathway	9.69697	Biological Process	6
regulation of autophagy of mitochondrion	9.69697	Biological Process	6
positive regulation of ubiquitin-protein transferase activity	9.69697	Biological Process	6
regulation of stress fiber assembly	9.69697	Biological Process	6
intrinsic apoptotic signaling pathway in response to DNA damage by p53 class mediator	9.69697	Biological Process	6
axon guidance	8.08081	Biological Process	5
nerve growth factor signaling pathway	8.08081	Biological Process	5
regulation of nucleic acid-templated transcription	8.08081	Biological Process	5
adult behavior	8.08081	Biological Process	5
peptidyl-serine phosphorylation	8.08081	Biological Process	5
maintenance of protein location in nucleus	8.08081	Biological Process	5
integrin-mediated signaling pathway	8.08081	Biological Process	5
fructose 6-phosphate metabolic process	8.08081	Biological Process	5
response to endoplasmic reticulum stress	8.08081	Biological Process	5
muscle contraction	8.08081	Biological Process	5
blood vessel endothelial cell migration	8.08081	Biological Process	5
negative regulation of translation	8.08081	Biological Process	5
establishment or maintenance of cell polarity	8.08081	Biological Process	5
endoderm development	8.08081	Biological Process	5
fin development	8.08081	Biological Process	5
cell population proliferation	8.08081	Biological Process	5
meiotic cell cycle	8.08081	Biological Process	5
cell-matrix adhesion	8.08081	Biological Process	5
cell division	8.08081	Biological Process	5
lipid homeostasis	8.08081	Biological Process	5
retinal ganglion cell axon guidance	8.08081	Biological Process	5
regulation of protein kinase activity	8.08081	Biological Process	5
microtubule bundle formation	8.08081	Biological Process	5
regulation of autophagy	6.46465	Biological Process	4
tissue development	6.46465	Biological Process	4
neurotrophin TRK receptor signaling pathway	6.46465	Biological Process	4
antigen receptor-mediated signaling pathway	6.46465	Biological Process	4
store-operated calcium entry	6.46465	Biological Process	4
pancreas development	6.46465	Biological Process	4
lysosome organization	6.46465	Biological Process	4
insulin receptor signaling pathway	6.46465	Biological Process	4
steroid metabolic process	6.46465	Biological Process	4
chemical synaptic transmission	6.46465	Biological Process	4
activation of store-operated calcium channel activity	6.46465	Biological Process	4
double-strand break repair via homologous recombination	6.46465	Biological Process	4
response to starvation	6.46465	Biological Process	4
regulation of calcium ion transport	6.46465	Biological Process	4
Golgi localization	6.46465	Biological Process	4
negative regulation of phosphatase activity	6.46465	Biological Process	4
B cell receptor signaling pathway	6.46465	Biological Process	4
phospholipid transport	6.46465	Biological Process	4
mitochondrial fusion	6.46465	Biological Process	4
cellular calcium ion homeostasis	6.46465	Biological Process	4
response to cortisol	6.46465	Biological Process	4
DNA damage checkpoint	6.46465	Biological Process	4
basement membrane assembly	6.46465	Biological Process	4
positive regulation of JNK cascade	6.46465	Biological Process	4
actin filament organization	6.46465	Biological Process	4
cellular response to steroid hormone stimulus	6.46465	Biological Process	4
protein folding	6.46465	Biological Process	4
neuron differentiation	6.46465	Biological Process	4
regulation of apoptotic process	6.46465	Biological Process	4
cartilage development	6.46465	Biological Process	4
cholesterol metabolic process	6.46465	Biological Process	4
in utero embryonic development	6.46465	Biological Process	4
positive regulation of gene expression	6.46465	Biological Process	4
G protein-coupled acetylcholine receptor signaling pathway	6.46465	Biological Process	4
convergent extension involved in gastrulation	6.46465	Biological Process	4
protein transport	6.46465	Biological Process	4
regulation of cell adhesion	6.46465	Biological Process	4
regulation of mitotic nuclear division	6.46465	Biological Process	4
positive regulation of CREB transcription factor activity	6.46465	Biological Process	4
transcription by RNA polymerase II	6.46465	Biological Process	4
microtubule cytoskeleton organization	6.46465	Biological Process	4
nuclear-transcribed mRNA poly(A) tail shortening	4.84848	Biological Process	3
entrainment of circadian clock	4.84848	Biological Process	3
peptidyl-pyrromethane cofactor linkage	4.84848	Biological Process	3
cell recognition	4.84848	Biological Process	3
protein localization	4.84848	Biological Process	3
protein polyubiquitination	4.84848	Biological Process	3
actin filament depolymerization	4.84848	Biological Process	3
calcium ion-regulated exocytosis of neurotransmitter	4.84848	Biological Process	3
protein glycosylation	4.84848	Biological Process	3
glutathione metabolic process	4.84848	Biological Process	3
BMP signaling pathway	4.84848	Biological Process	3
tRNA aminoacylation for protein translation	4.84848	Biological Process	3
transcription elongation from RNA polymerase II promoter	4.84848	Biological Process	3
osteoblast differentiation	4.84848	Biological Process	3
glutamyl-tRNA aminoacylation	4.84848	Biological Process	3
exocyst assembly	4.84848	Biological Process	3
triglyceride biosynthetic process	4.84848	Biological Process	3
posterior lateral line development	4.84848	Biological Process	3
chloride transmembrane transport	4.84848	Biological Process	3
sulfur oxidation	4.84848	Biological Process	3
cell communication	4.84848	Biological Process	3
ER to Golgi ceramide transport	4.84848	Biological Process	3
myelination	4.84848	Biological Process	3
hematopoietic progenitor cell differentiation	4.84848	Biological Process	3
heterophilic cell-cell adhesion via plasma membrane cell adhesion molecules	4.84848	Biological Process	3
regulation of signaling	4.84848	Biological Process	3
deadenylation-independent decapping of nuclear-transcribed mRNA	4.84848	Biological Process	3
mitochondrion morphogenesis	4.84848	Biological Process	3
regulation of response to reactive oxygen species	4.84848	Biological Process	3
cytoskeleton organization	4.84848	Biological Process	3
endoplasmic reticulum organization	4.84848	Biological Process	3
positive regulation of macroautophagy	4.84848	Biological Process	3
neuromuscular junction development	4.84848	Biological Process	3
tRNA aminoacylation	4.84848	Biological Process	3
bone development	4.84848	Biological Process	3
protein homotetramerization	4.84848	Biological Process	3
heart morphogenesis	4.84848	Biological Process	3
regulation of Ral protein signal transduction	4.84848	Biological Process	3
neurogenesis	4.84848	Biological Process	3
neurotransmitter transport	4.84848	Biological Process	3
response to oxidative stress	4.84848	Biological Process	3
ceramide metabolic process	4.84848	Biological Process	3
phototransduction, visible light	4.84848	Biological Process	3
positive regulation of phosphorylation of RNA polymerase II C-terminal domain	4.84848	Biological Process	3
determination of left/right symmetry	4.84848	Biological Process	3
regulation of DNA-dependent DNA replication initiation	4.84848	Biological Process	3
positive regulation of cell adhesion	4.84848	Biological Process	3
positive regulation of cyclin-dependent protein serine/threonine kinase activity	4.84848	Biological Process	3
copper ion import	4.84848	Biological Process	3
prolyl-tRNA aminoacylation	4.84848	Biological Process	3
iron ion transport	4.84848	Biological Process	3
regulation of JNK cascade	4.84848	Biological Process	3
maturation of LSU-rRNA	4.84848	Biological Process	3
epithelial structure maintenance	4.84848	Biological Process	3
smoothened signaling pathway	4.84848	Biological Process	3
axonogenesis	4.84848	Biological Process	3
vesicle fusion	4.84848	Biological Process	3
histone H4-K16 acetylation	4.84848	Biological Process	3
anatomical structure development	4.84848	Biological Process	3
nucleotide-excision repair	4.84848	Biological Process	3
regulation of calcium ion-dependent exocytosis	4.84848	Biological Process	3
regulation of gene expression	4.84848	Biological Process	3
regulation of mRNA stability	4.84848	Biological Process	3
protein homotrimerization	4.84848	Biological Process	3
regulation of endocytosis	4.84848	Biological Process	3
positive regulation of transcription via serum response element binding	4.84848	Biological Process	3
tetrapyrrole biosynthetic process	4.84848	Biological Process	3
immune response	4.84848	Biological Process	3
sphingolipid metabolic process	3.23232	Biological Process	2
negative regulation of keratinocyte proliferation	3.23232	Biological Process	2
oogenesis	3.23232	Biological Process	2
sensory neuron axon guidance	3.23232	Biological Process	2
skeletal system development	3.23232	Biological Process	2
negative regulation of mitotic nuclear division	3.23232	Biological Process	2
tricarboxylic acid cycle	3.23232	Biological Process	2
response to temperature stimulus	3.23232	Biological Process	2
animal organ morphogenesis	3.23232	Biological Process	2
ventricular system development	3.23232	Biological Process	2
positive regulation of hemoglobin biosynthetic process	3.23232	Biological Process	2
histone H3-K27 demethylation	3.23232	Biological Process	2
regulation of G2/M transition of mitotic cell cycle	3.23232	Biological Process	2
hair follicle development	3.23232	Biological Process	2
NAD biosynthetic process	3.23232	Biological Process	2
transcription-dependent tethering of RNA polymerase II gene DNA at nuclear periphery	3.23232	Biological Process	2
regulation of cell cycle process	3.23232	Biological Process	2
adherens junction organization	3.23232	Biological Process	2
TOR signaling	3.23232	Biological Process	2
cellular response to transforming growth factor beta stimulus	3.23232	Biological Process	2
ventral spinal cord interneuron differentiation	3.23232	Biological Process	2
protein localization to lysosome	3.23232	Biological Process	2
histone H3-K4 acetylation	3.23232	Biological Process	2
myelination of posterior lateral line nerve axons	3.23232	Biological Process	2
regulation of cytokine production	3.23232	Biological Process	2
cartilage condensation	3.23232	Biological Process	2
phosphatidylinositol phosphorylation	3.23232	Biological Process	2
fatty acid beta-oxidation using acyl-CoA dehydrogenase	3.23232	Biological Process	2
hematopoietic or lymphoid organ development	3.23232	Biological Process	2
retrograde protein transport, ER to cytosol	3.23232	Biological Process	2
blood circulation	3.23232	Biological Process	2
gastrulation with mouth forming second	3.23232	Biological Process	2
cell projection organization	3.23232	Biological Process	2
inositol trisphosphate metabolic process	3.23232	Biological Process	2
ossification	3.23232	Biological Process	2
viral entry into host cell	3.23232	Biological Process	2
kidney development	3.23232	Biological Process	2
developmental pigmentation	3.23232	Biological Process	2
artery development	3.23232	Biological Process	2
protein N-linked glycosylation	3.23232	Biological Process	2
phosphatidylserine metabolic process	3.23232	Biological Process	2
regulation of cell growth	3.23232	Biological Process	2
regulation of MAPK cascade	3.23232	Biological Process	2
regulation of protein complex stability	3.23232	Biological Process	2
embryonic skeletal system development	3.23232	Biological Process	2
coenzyme A biosynthetic process	3.23232	Biological Process	2
locomotory behavior	3.23232	Biological Process	2
regulation of RNA splicing	3.23232	Biological Process	2
cerebellar Purkinje cell differentiation	3.23232	Biological Process	2
regulation of developmental process	3.23232	Biological Process	2
cilium assembly	3.23232	Biological Process	2
negative regulation of stem cell proliferation	3.23232	Biological Process	2
regulation of DNA-templated transcription, elongation	3.23232	Biological Process	2
heme catabolic process	3.23232	Biological Process	2
Schwann cell development	3.23232	Biological Process	2
skin development	3.23232	Biological Process	2
germ cell migration	3.23232	Biological Process	2
muscle cell fate specification	3.23232	Biological Process	2
dorsal aorta development	3.23232	Biological Process	2
steroid hormone mediated signaling pathway	3.23232	Biological Process	2
regulation of branching involved in salivary gland morphogenesis	3.23232	Biological Process	2
rhombomere boundary formation	3.23232	Biological Process	2
negative regulation of apoptotic process	3.23232	Biological Process	2
fatty acid metabolic process	3.23232	Biological Process	2
carbohydrate transport	3.23232	Biological Process	2
negative regulation of SMAD protein complex assembly	3.23232	Biological Process	2
negative chemotaxis	3.23232	Biological Process	2
cell surface receptor signaling pathway	3.23232	Biological Process	2
response to light stimulus	3.23232	Biological Process	2
negative regulation of erythrocyte differentiation	3.23232	Biological Process	2
anterior/posterior axis specification	3.23232	Biological Process	2
adenohypophysis development	3.23232	Biological Process	2
negative regulation of NF-kappaB transcription factor activity	3.23232	Biological Process	2
gamma-aminobutyric acid transport	3.23232	Biological Process	2
cell volume homeostasis	3.23232	Biological Process	2
establishment of skin barrier	3.23232	Biological Process	2
phospholipid dephosphorylation	3.23232	Biological Process	2
spliceosomal complex assembly	3.23232	Biological Process	2
developmental growth	3.23232	Biological Process	2
cellular component assembly	3.23232	Biological Process	2
photoperiodism	3.23232	Biological Process	2
metaphase plate congression	3.23232	Biological Process	2
cellular iron ion homeostasis	3.23232	Biological Process	2
cation transport	3.23232	Biological Process	2
Schwann cell differentiation	3.23232	Biological Process	2
skeletal muscle tissue development	3.23232	Biological Process	2
somatic stem cell population maintenance	3.23232	Biological Process	2
myelination of anterior lateral line nerve axons	3.23232	Biological Process	2
axonal fasciculation	3.23232	Biological Process	2
phospholipid metabolic process	3.23232	Biological Process	2
L-serine transport	3.23232	Biological Process	2
positive regulation of Wnt signaling pathway	3.23232	Biological Process	2
epithelial cilium movement involved in determination of left/right asymmetry	3.23232	Biological Process	2
negative regulation of smooth muscle cell proliferation	3.23232	Biological Process	2
lens development in camera-type eye	3.23232	Biological Process	2
regulation of insulin-like growth factor receptor signaling pathway	3.23232	Biological Process	2
cerebellar neuron development	3.23232	Biological Process	2
activation of MAPKK activity	3.23232	Biological Process	2
semaphorin-plexin signaling pathway	3.23232	Biological Process	2
negative regulation of BMP signaling pathway	3.23232	Biological Process	2
lymphangiogenesis	3.23232	Biological Process	2
regulation of epidermal cell division	3.23232	Biological Process	2
positive regulation of fibroblast growth factor receptor signaling pathway	3.23232	Biological Process	2
fatty acid catabolic process	3.23232	Biological Process	2
collagen fibril organization	3.23232	Biological Process	2
axonal transport of mitochondrion	3.23232	Biological Process	2
peptidyl-threonine dephosphorylation	3.23232	Biological Process	2
positive regulation of epidermal cell differentiation	3.23232	Biological Process	2
limb epidermis development	3.23232	Biological Process	2
fin morphogenesis	3.23232	Biological Process	2
ketone body biosynthetic process	3.23232	Biological Process	2
RNA secondary structure unwinding	3.23232	Biological Process	2
inflammatory response	3.23232	Biological Process	2
cell fate commitment	3.23232	Biological Process	2
liver development	3.23232	Biological Process	2
regulation of hematopoietic stem cell differentiation	3.23232	Biological Process	2
keratinocyte development	3.23232	Biological Process	2
RNA processing	3.23232	Biological Process	2
regulation of centrosome duplication	3.23232	Biological Process	2
face development	3.23232	Biological Process	2
negative regulation of transforming growth factor beta receptor signaling pathway	3.23232	Biological Process	2
chromatin silencing	3.23232	Biological Process	2
inner ear development	3.23232	Biological Process	2
glycogen biosynthetic process	3.23232	Biological Process	2
peripheral nervous system neuron axonogenesis	3.23232	Biological Process	2
Notch signaling pathway	3.23232	Biological Process	2
skeletal system morphogenesis	3.23232	Biological Process	2
muscle cell cellular homeostasis	3.23232	Biological Process	2
circadian rhythm	3.23232	Biological Process	2
neuronal stem cell population maintenance	3.23232	Biological Process	2
N-terminal protein myristoylation	3.23232	Biological Process	2
circadian regulation of gene expression	3.23232	Biological Process	2
steroid biosynthetic process	3.23232	Biological Process	2
fatty acid biosynthetic process	3.23232	Biological Process	2
regulation of Fc receptor mediated stimulatory signaling pathway	3.23232	Biological Process	2
positive regulation of protein export from nucleus	3.23232	Biological Process	2
glycogen catabolic process	3.23232	Biological Process	2
melanocyte differentiation	3.23232	Biological Process	2
fatty acid beta-oxidation	3.23232	Biological Process	2
intraciliary transport involved in cilium assembly	3.23232	Biological Process	2
regulation of striated muscle tissue development	3.23232	Biological Process	2
digestive tract development	3.23232	Biological Process	2
negative regulation of axon extension involved in axon guidance	3.23232	Biological Process	2
morphogenesis of embryonic epithelium	3.23232	Biological Process	2
zinc ion transmembrane transport	3.23232	Biological Process	2
regulation of ectodermal cell fate specification	1.61616	Biological Process	1
ribosome biogenesis	1.61616	Biological Process	1
Roundabout signaling pathway	1.61616	Biological Process	1
respiratory system process	1.61616	Biological Process	1
epidermis development	1.61616	Biological Process	1
negative regulation of TOR signaling	1.61616	Biological Process	1
regulation of translational initiation	1.61616	Biological Process	1
positive regulation of DNA biosynthetic process	1.61616	Biological Process	1
positive regulation of proteasomal ubiquitin-dependent protein catabolic process	1.61616	Biological Process	1
establishment of cell polarity	1.61616	Biological Process	1
developmental process	1.61616	Biological Process	1
regulation of signal transduction	1.61616	Biological Process	1
glycosaminoglycan biosynthetic process	1.61616	Biological Process	1
release of sequestered calcium ion into cytosol	1.61616	Biological Process	1
endosomal lumen acidification	1.61616	Biological Process	1
positive regulation of angiogenesis	1.61616	Biological Process	1
AMP metabolic process	1.61616	Biological Process	1
phospholipid biosynthetic process	1.61616	Biological Process	1
ATP hydrolysis coupled proton transport	1.61616	Biological Process	1
estrogen biosynthetic process	1.61616	Biological Process	1
chloride transport	1.61616	Biological Process	1
response to iron ion	1.61616	Biological Process	1
iron ion transmembrane transport	1.61616	Biological Process	1
axon target recognition	1.61616	Biological Process	1
primitive hemopoiesis	1.61616	Biological Process	1
regulation of intracellular pH	1.61616	Biological Process	1
establishment or maintenance of actin cytoskeleton polarity	1.61616	Biological Process	1
positive regulation of actin nucleation	1.61616	Biological Process	1
embryonic liver development	1.61616	Biological Process	1
lung alveolus development	1.61616	Biological Process	1
camera-type eye development	1.61616	Biological Process	1
melanocyte apoptotic process	1.61616	Biological Process	1
early endosome to late endosome transport	1.61616	Biological Process	1
phototransduction	1.61616	Biological Process	1
regulation of hydrogen peroxide metabolic process	1.61616	Biological Process	1
proximal/distal pattern formation	1.61616	Biological Process	1
blood vessel lumenization	1.61616	Biological Process	1
cholesterol biosynthetic process	1.61616	Biological Process	1
retina development in camera-type eye	1.61616	Biological Process	1
response to estrogen	1.61616	Biological Process	1
hepatocyte proliferation	1.61616	Biological Process	1
heme O biosynthetic process	1.61616	Biological Process	1
pseudouridine synthesis	1.61616	Biological Process	1
negative regulation of cell growth	1.61616	Biological Process	1
positive regulation of glucose import	1.61616	Biological Process	1
endocardial progenitor cell migration to the midline involved in heart field formation	1.61616	Biological Process	1
dorsal/ventral axis specification	1.61616	Biological Process	1
dendrite morphogenesis	1.61616	Biological Process	1
RNA splicing	1.61616	Biological Process	1
hypotonic salinity response	1.61616	Biological Process	1
negative regulation of mesodermal cell fate specification	1.61616	Biological Process	1
negative regulation of protein kinase activity	1.61616	Biological Process	1
skeletal muscle thin filament assembly	1.61616	Biological Process	1
hydrogen peroxide catabolic process	1.61616	Biological Process	1
inner ear auditory receptor cell differentiation	1.61616	Biological Process	1
notochord cell vacuolation	1.61616	Biological Process	1
regulation of type I interferon-mediated signaling pathway	1.61616	Biological Process	1
positive regulation of translation	1.61616	Biological Process	1
receptor recycling	1.61616	Biological Process	1
hexose transmembrane transport	1.61616	Biological Process	1
cell redox homeostasis	1.61616	Biological Process	1
early endosome to Golgi transport	1.61616	Biological Process	1
somatic muscle development	1.61616	Biological Process	1
melanocyte migration	1.61616	Biological Process	1
3'-UTR-mediated mRNA destabilization	1.61616	Biological Process	1
endoplasmic reticulum unfolded protein response	1.61616	Biological Process	1
negative regulation of cytokine biosynthetic process	1.61616	Biological Process	1
extracellular matrix disassembly	1.61616	Biological Process	1
cellular protein modification process	1.61616	Biological Process	1
protein desumoylation	1.61616	Biological Process	1
cardiac muscle cell proliferation	1.61616	Biological Process	1
pointed-end actin filament capping	1.61616	Biological Process	1
Cajal body organization	1.61616	Biological Process	1
positive regulation of cell population proliferation	1.61616	Biological Process	1
cell development	1.61616	Biological Process	1
regulation of protein export from nucleus	1.61616	Biological Process	1
cloaca development	1.61616	Biological Process	1
endosome organization	1.61616	Biological Process	1
transforming growth factor beta receptor signaling pathway	1.61616	Biological Process	1
inositol phosphate-mediated signaling	1.61616	Biological Process	1
otolith morphogenesis	1.61616	Biological Process	1
somitogenesis	1.61616	Biological Process	1
spinal cord development	1.61616	Biological Process	1
negative regulation of receptor signaling pathway via JAK-STAT	1.61616	Biological Process	1
glycine decarboxylation via glycine cleavage system	1.61616	Biological Process	1
Kit signaling pathway	1.61616	Biological Process	1
protein transport to vacuole involved in ubiquitin-dependent protein catabolic process via the multivesicular body sorting pathway	1.61616	Biological Process	1
neural crest cell development	1.61616	Biological Process	1
regulation of blood pressure	1.61616	Biological Process	1
defense response	1.61616	Biological Process	1
mRNA localization resulting in posttranscriptional regulation of gene expression	1.61616	Biological Process	1
ureteric bud invasion	1.61616	Biological Process	1
positive regulation of histone deacetylase activity	1.61616	Biological Process	1
cellular lipid metabolic process	1.61616	Biological Process	1
erythrocyte development	1.61616	Biological Process	1
sodium ion transport	1.61616	Biological Process	1
negative regulation of smoothened signaling pathway	1.61616	Biological Process	1
response to hydrogen peroxide	1.61616	Biological Process	1
basement membrane organization	1.61616	Biological Process	1
nucleoside transport	1.61616	Biological Process	1
cell death	1.61616	Biological Process	1
negative regulation of bone mineralization involved in bone maturation	1.61616	Biological Process	1
regulation of axon extension	1.61616	Biological Process	1
stem cell fate commitment	1.61616	Biological Process	1
proteasome assembly	1.61616	Biological Process	1
brown fat cell differentiation	1.61616	Biological Process	1
positive regulation of pathway-restricted SMAD protein phosphorylation	1.61616	Biological Process	1
semicircular canal development	1.61616	Biological Process	1
heart jogging	1.61616	Biological Process	1
regulation of alternative mRNA splicing, via spliceosome	1.61616	Biological Process	1
iron ion homeostasis	1.61616	Biological Process	1
phosphatidylethanolamine biosynthetic process	1.61616	Biological Process	1
response to bacterium	1.61616	Biological Process	1
oocyte growth	1.61616	Biological Process	1
heart trabecula formation	1.61616	Biological Process	1
snRNA processing	1.61616	Biological Process	1
nucleate erythrocyte maturation	1.61616	Biological Process	1
prostaglandin biosynthetic process	1.61616	Biological Process	1
animal organ development	1.61616	Biological Process	1
positive regulation of interleukin-2 production	1.61616	Biological Process	1
embryonic pectoral fin morphogenesis	1.61616	Biological Process	1
sodium ion import across plasma membrane	1.61616	Biological Process	1
heterochromatin assembly	1.61616	Biological Process	1
ion transmembrane transport	1.61616	Biological Process	1
endosome to lysosome transport	1.61616	Biological Process	1
phosphatidylinositol-mediated signaling	1.61616	Biological Process	1
nucleosome assembly	1.61616	Biological Process	1
cell migration involved in gastrulation	1.61616	Biological Process	1
positive regulation of T cell receptor signaling pathway	1.61616	Biological Process	1
translational initiation	1.61616	Biological Process	1
positive regulation of canonical Wnt signaling pathway	1.61616	Biological Process	1
endothelial to hematopoietic transition	1.61616	Biological Process	1
embryonic hemopoiesis	1.61616	Biological Process	1
cellular response to amino acid stimulus	1.61616	Biological Process	1
glucose import	1.61616	Biological Process	1
cellular response to insulin stimulus	1.61616	Biological Process	1
regulation of phosphorylation	1.61616	Biological Process	1
gene expression	1.61616	Biological Process	1
behavioral response to pain	1.61616	Biological Process	1
intrinsic apoptotic signaling pathway by p53 class mediator	1.61616	Biological Process	1
gastrulation	1.61616	Biological Process	1
cell-substrate junction assembly	1.61616	Biological Process	1
regulation of cytoplasmic translation	1.61616	Biological Process	1
T cell receptor signaling pathway	1.61616	Biological Process	1
negative regulation of muscle organ development	1.61616	Biological Process	1
neural crest cell fate specification	1.61616	Biological Process	1
peripheral nervous system development	1.61616	Biological Process	1
positive regulation of protein kinase B signaling	1.61616	Biological Process	1
regulation of pH	1.61616	Biological Process	1
negative regulation of cell population proliferation	1.61616	Biological Process	1
actin cytoskeleton reorganization	1.61616	Biological Process	1
fatty acid transport	1.61616	Biological Process	1
positive regulation of endothelial cell chemotaxis by VEGF-activated vascular endothelial growth factor receptor signaling pathway	1.61616	Biological Process	1
cardiac conduction	1.61616	Biological Process	1
Golgi vesicle budding	1.61616	Biological Process	1
cytokine-mediated signaling pathway	1.61616	Biological Process	1
protein autophosphorylation	1.61616	Biological Process	1
cartilage morphogenesis	1.61616	Biological Process	1
pectoral fin development	1.61616	Biological Process	1
pectoral fin morphogenesis	1.61616	Biological Process	1
protein retention in Golgi apparatus	1.61616	Biological Process	1
platelet aggregation	1.61616	Biological Process	1
intestinal epithelial structure maintenance	1.61616	Biological Process	1
response to stimulus	1.61616	Biological Process	1
convergent extension involved in axis elongation	1.61616	Biological Process	1
cellular response to organic cyclic compound	1.61616	Biological Process	1
regulation of actin cytoskeleton organization	1.61616	Biological Process	1
exocrine pancreas development	1.61616	Biological Process	1
positive regulation of collagen biosynthetic process	1.61616	Biological Process	1
vasoconstriction	1.61616	Biological Process	1
proteoglycan biosynthetic process	1.61616	Biological Process	1
ATP metabolic process	1.61616	Biological Process	1
glial cell migration	1.61616	Biological Process	1
heparan sulfate proteoglycan biosynthetic process	1.61616	Biological Process	1
posterior lateral line neuromast development	1.61616	Biological Process	1
positive regulation of vascular endothelial growth factor receptor signaling pathway	1.61616	Biological Process	1
protein-chromophore linkage	1.61616	Biological Process	1
anion transport	1.61616	Biological Process	1
neuromast development	1.61616	Biological Process	1
angiogenesis involved in wound healing	1.61616	Biological Process	1
intra-Golgi vesicle-mediated transport	1.61616	Biological Process	1
ceramide biosynthetic process	1.61616	Biological Process	1
regulation of defense response to virus	1.61616	Biological Process	1
generation of neurons	1.61616	Biological Process	1
positive regulation of autophagy	1.61616	Biological Process	1
non-myelinated axon ensheathment	1.61616	Biological Process	1
sphingolipid biosynthetic process	1.61616	Biological Process	1
nuclear-transcribed mRNA catabolic process, nonsense-mediated decay	1.61616	Biological Process	1
detection of mechanical stimulus involved in sensory perception	1.61616	Biological Process	1
cardiac muscle tissue regeneration	1.61616	Biological Process	1
posterior lateral line neuromast deposition	1.61616	Biological Process	1
SMAD protein signal transduction	1.61616	Biological Process	1
embryonic body morphogenesis	1.61616	Biological Process	1
epiboly involved in gastrulation with mouth forming second	1.61616	Biological Process	1
regulation of protein stability	1.61616	Biological Process	1
actin nucleation	1.61616	Biological Process	1
embryonic neurocranium morphogenesis	1.61616	Biological Process	1
cellular response to cAMP	1.61616	Biological Process	1
Fc receptor signaling pathway	1.61616	Biological Process	1
activation of protein kinase activity	1.61616	Biological Process	1
positive regulation of macrophage cytokine production	1.61616	Biological Process	1
negative regulation of nodal signaling pathway involved in determination of lateral mesoderm left/right asymmetry	1.61616	Biological Process	1
blood vessel morphogenesis	1.61616	Biological Process	1
sprouting angiogenesis	1.61616	Biological Process	1
visual perception	1.61616	Biological Process	1
neural tube formation	1.61616	Biological Process	1
nucleobase-containing compound metabolic process	1.61616	Biological Process	1
hemidesmosome assembly	1.61616	Biological Process	1
calcium ion homeostasis	1.61616	Biological Process	1
odontogenesis	1.61616	Biological Process	1
positive regulation of blood vessel endothelial cell migration	1.61616	Biological Process	1
endodermal cell differentiation	1.61616	Biological Process	1
protein K48-linked ubiquitination	1.61616	Biological Process	1
sterol biosynthetic process	1.61616	Biological Process	1
positive regulation of intracellular estrogen receptor signaling pathway	1.61616	Biological Process	1
negative regulation of GTPase activity	1.61616	Biological Process	1
cell migration involved in heart development	1.61616	Biological Process	1
positive regulation of endothelial cell proliferation	1.61616	Biological Process	1
cardiac myofibril assembly	1.61616	Biological Process	1
cyclooxygenase pathway	1.61616	Biological Process	1
mRNA splicing, via spliceosome	1.61616	Biological Process	1
receptor clustering	1.61616	Biological Process	1
regulation of catalytic activity	1.61616	Biological Process	1
protein kinase D signaling	1.61616	Biological Process	1
positive regulation of peptidyl-serine phosphorylation	1.61616	Biological Process	1
liver morphogenesis	1.61616	Biological Process	1
lung morphogenesis	1.61616	Biological Process	1
histone acetylation	1.61616	Biological Process	1
activation of cysteine-type endopeptidase activity involved in apoptotic process by cytochrome c	1.61616	Biological Process	1
positive regulation of interleukin-8 production	1.61616	Biological Process	1
regulation of membrane potential	1.61616	Biological Process	1
leukocyte differentiation	1.61616	Biological Process	1
paraxial mesoderm development	1.61616	Biological Process	1
neuron development	1.61616	Biological Process	1
hypochlorous acid biosynthetic process	1.61616	Biological Process	1
fibroblast growth factor receptor signaling pathway	1.61616	Biological Process	1
magnesium ion transport	1.61616	Biological Process	1
carboxylic acid metabolic process	1.61616	Biological Process	1
pronephros development	1.61616	Biological Process	1
regulation of collateral sprouting in absence of injury	1.61616	Biological Process	1
lateral line development	1.61616	Biological Process	1
regulation of T cell cytokine production	1.61616	Biological Process	1
mitochondrial magnesium ion transmembrane transport	1.61616	Biological Process	1
multicellular organism growth	1.61616	Biological Process	1
filopodium assembly	1.61616	Biological Process	1
cellular response to ethanol	1.61616	Biological Process	1
caveola assembly	1.61616	Biological Process	1
protein targeting to vacuole	1.61616	Biological Process	1
positive regulation of protein tyrosine kinase activity	1.61616	Biological Process	1
peptide catabolic process	1.61616	Biological Process	1
hindlimb morphogenesis	1.61616	Biological Process	1
gastro-intestinal system smooth muscle contraction	1.61616	Biological Process	1
glial cell development	1.61616	Biological Process	1
glucose homeostasis	1.61616	Biological Process	1
endoplasmic reticulum to Golgi vesicle-mediated transport	1.61616	Biological Process	1
positive regulation of NF-kappaB transcription factor activity	1.61616	Biological Process	1
actin filament bundle organization	1.61616	Biological Process	1
glycogen metabolic process	1.61616	Biological Process	1
positive regulation of osteoblast differentiation	1.61616	Biological Process	1
response to hypoxia	1.61616	Biological Process	1
Golgi organization	1.61616	Biological Process	1
positive regulation of neuron projection development	1.61616	Biological Process	1
biosynthetic process	1.61616	Biological Process	1
positive regulation of inflammatory response	1.61616	Biological Process	1
chondroitin sulfate proteoglycan biosynthetic process	1.61616	Biological Process	1
regulation of bone remodeling	1.61616	Biological Process	1
embryonic pattern specification	1.61616	Biological Process	1
long-chain fatty acid metabolic process	1.61616	Biological Process	1
cortical actin cytoskeleton organization	1.61616	Biological Process	1
ephrin receptor signaling pathway	1.61616	Biological Process	1
chondrocyte differentiation	1.61616	Biological Process	1
rRNA processing	1.61616	Biological Process	1
negative regulation of cell death	1.61616	Biological Process	1
embryonic heart tube development	1.61616	Biological Process	1
nucleate erythrocyte development	1.61616	Biological Process	1
cardioblast differentiation	1.61616	Biological Process	1
positive regulation of focal adhesion assembly	1.61616	Biological Process	1
cellular response to light stimulus	1.61616	Biological Process	1
startle response	1.61616	Biological Process	1
sphinganine metabolic process	1.61616	Biological Process	1
epithelial to mesenchymal transition	1.61616	Biological Process	1
negative regulation of chondrocyte development	1.61616	Biological Process	1
intestinal cholesterol absorption	1.61616	Biological Process	1
hematopoietic stem cell differentiation	1.61616	Biological Process	1
phosphatidylinositol biosynthetic process	1.61616	Biological Process	1
mRNA processing	1.61616	Biological Process	1
spindle assembly	1.61616	Biological Process	1
endoplasmic reticulum tubular network maintenance	1.61616	Biological Process	1
apoptotic cell clearance	1.61616	Biological Process	1
forelimb morphogenesis	1.61616	Biological Process	1
ADP biosynthetic process	1.61616	Biological Process	1
cellular response to xenobiotic stimulus	1.61616	Biological Process	1
membrane	90.9091	Cellular Component	225
integral component of membrane	87.6768	Cellular Component	217
nucleus	72.3232	Cellular Component	179
cytoplasm	58.5859	Cellular Component	145
plasma membrane	23.8384	Cellular Component	59
cytosol	17.3737	Cellular Component	43
cell cortex	17.3737	Cellular Component	43
site of polarized growth	16.1616	Cellular Component	40
nucleoplasm	14.5455	Cellular Component	36
mitochondrion	14.1414	Cellular Component	35
integral component of plasma membrane	13.7374	Cellular Component	34
Golgi apparatus	12.1212	Cellular Component	30
endoplasmic reticulum	11.7172	Cellular Component	29
intracellular	10.9091	Cellular Component	27
transcription factor complex	7.67677	Cellular Component	19
extracellular space	7.27273	Cellular Component	18
mitochondrial inner membrane	6.86869	Cellular Component	17
cytoskeleton	6.46465	Cellular Component	16
extrinsic component of cytoplasmic side of plasma membrane	5.25253	Cellular Component	13
P-body	5.25253	Cellular Component	13
endosome	5.25253	Cellular Component	13
endomembrane system	4.84848	Cellular Component	12
nucleolus	4.84848	Cellular Component	12
semaphorin receptor complex	4.44444	Cellular Component	11
Golgi membrane	4.0404	Cellular Component	10
lamellipodium	4.0404	Cellular Component	10
intracellular membrane-bounded organelle	4.0404	Cellular Component	10
cell projection	4.0404	Cellular Component	10
myosin complex	4.0404	Cellular Component	10
collagen trimer	3.63636	Cellular Component	9
spindle pole	3.63636	Cellular Component	9
centrosome	3.63636	Cellular Component	9
endoplasmic reticulum membrane	3.63636	Cellular Component	9
basement membrane	3.23232	Cellular Component	8
bicellular tight junction	3.23232	Cellular Component	8
kinesin complex	3.23232	Cellular Component	8
extracellular region	3.23232	Cellular Component	8
perinuclear region of cytoplasm	3.23232	Cellular Component	8
clathrin-coated pit	3.23232	Cellular Component	8
cytoplasmic stress granule	2.82828	Cellular Component	7
microtubule cytoskeleton	2.82828	Cellular Component	7
calcineurin complex	2.82828	Cellular Component	7
lysosome	2.82828	Cellular Component	7
Z disc	2.82828	Cellular Component	7
extracellular exosome	2.82828	Cellular Component	7
neuronal cell body	2.82828	Cellular Component	7
chromatin	2.82828	Cellular Component	7
mitotic spindle	2.82828	Cellular Component	7
axon terminus	2.42424	Cellular Component	6
late endosome	2.42424	Cellular Component	6
Atg1/ULK1 kinase complex	2.42424	Cellular Component	6
Parkin-FBXW7-Cul1 ubiquitin ligase complex	2.42424	Cellular Component	6
SCF ubiquitin ligase complex	2.42424	Cellular Component	6
intermediate filament	2.42424	Cellular Component	6
stress fiber	2.42424	Cellular Component	6
dynactin complex	2.42424	Cellular Component	6
dendrite	2.42424	Cellular Component	6
microtubule organizing center	2.42424	Cellular Component	6
cytoplasmic vesicle	2.0202	Cellular Component	5
integral component of endoplasmic reticulum membrane	2.0202	Cellular Component	5
cell	2.0202	Cellular Component	5
STAGA complex	2.0202	Cellular Component	5
cullin-RING ubiquitin ligase complex	1.61616	Cellular Component	4
mitochondrial outer membrane	1.61616	Cellular Component	4
focal adhesion	1.61616	Cellular Component	4
trans-Golgi network	1.61616	Cellular Component	4
cell surface	1.61616	Cellular Component	4
nuclear chromatin	1.61616	Cellular Component	4
Cul3-RING ubiquitin ligase complex	1.61616	Cellular Component	4
Cul4-RING E3 ubiquitin ligase complex	1.61616	Cellular Component	4
peroxisome	1.61616	Cellular Component	4
nuclear matrix	1.61616	Cellular Component	4
ruffle	1.61616	Cellular Component	4
nuclear membrane	1.61616	Cellular Component	4
transcription elongation factor complex	1.21212	Cellular Component	3
microtubule	1.21212	Cellular Component	3
Rix1 complex	1.21212	Cellular Component	3
ER to Golgi transport vesicle membrane	1.21212	Cellular Component	3
nuclear speck	1.21212	Cellular Component	3
U2-type prespliceosome	1.21212	Cellular Component	3
exocyst	1.21212	Cellular Component	3
photoreceptor outer segment	1.21212	Cellular Component	3
extrinsic component of membrane	1.21212	Cellular Component	3
neuron projection	1.21212	Cellular Component	3
MSL complex	1.21212	Cellular Component	3
MLL1 complex	1.21212	Cellular Component	3
anchored component of plasma membrane	1.21212	Cellular Component	3
catalytic step 2 spliceosome	1.21212	Cellular Component	3
cell-cell adherens junction	1.21212	Cellular Component	3
preribosome, large subunit precursor	1.21212	Cellular Component	3
cyclin-dependent protein kinase holoenzyme complex	1.21212	Cellular Component	3
centriolar satellite	0.808081	Cellular Component	2
cell leading edge	0.808081	Cellular Component	2
chromosome	0.808081	Cellular Component	2
ciliary transition fiber	0.808081	Cellular Component	2
Golgi cisterna membrane	0.808081	Cellular Component	2
pronucleus	0.808081	Cellular Component	2
chromosome, centromeric region	0.808081	Cellular Component	2
keratin filament	0.808081	Cellular Component	2
mediator complex	0.808081	Cellular Component	2
U11/U12 snRNP	0.808081	Cellular Component	2
ubiquitin ligase complex	0.808081	Cellular Component	2
midbody	0.808081	Cellular Component	2
U12-type spliceosomal complex	0.808081	Cellular Component	2
cell junction	0.808081	Cellular Component	2
lysosomal membrane	0.808081	Cellular Component	2
U2 snRNP	0.808081	Cellular Component	2
ciliary basal body	0.808081	Cellular Component	2
histone methyltransferase complex	0.808081	Cellular Component	2
protein phosphatase type 2A complex	0.808081	Cellular Component	2
spectrin	0.808081	Cellular Component	2
kinetochore	0.808081	Cellular Component	2
axoneme	0.808081	Cellular Component	2
clathrin adaptor complex	0.808081	Cellular Component	2
nuclear envelope	0.808081	Cellular Component	2
endosome membrane	0.808081	Cellular Component	2
extracellular matrix	0.40404	Cellular Component	1
TORC1 complex	0.40404	Cellular Component	1
cleavage furrow	0.40404	Cellular Component	1
membrane raft	0.40404	Cellular Component	1
ribonucleoprotein granule	0.40404	Cellular Component	1
Hrd1p ubiquitin ligase ERAD-M complex	0.40404	Cellular Component	1
spindle	0.40404	Cellular Component	1
neuron projection terminus	0.40404	Cellular Component	1
adherens junction	0.40404	Cellular Component	1
MOZ/MORF histone acetyltransferase complex	0.40404	Cellular Component	1
spliceosomal complex	0.40404	Cellular Component	1
integrin complex	0.40404	Cellular Component	1
apoptosome	0.40404	Cellular Component	1
caveola	0.40404	Cellular Component	1
phosphatidylinositol 3-kinase complex	0.40404	Cellular Component	1
FHF complex	0.40404	Cellular Component	1
MLL3/4 complex	0.40404	Cellular Component	1
chromatin silencing complex	0.40404	Cellular Component	1
nuclear exosome (RNase complex)	0.40404	Cellular Component	1
sarcoplasmic reticulum membrane	0.40404	Cellular Component	1
integrator complex	0.40404	Cellular Component	1
proteasome complex	0.40404	Cellular Component	1
axon	0.40404	Cellular Component	1
TORC2 complex	0.40404	Cellular Component	1
histone acetyltransferase complex	0.40404	Cellular Component	1
rough endoplasmic reticulum	0.40404	Cellular Component	1
mitochondrial intermembrane space	0.40404	Cellular Component	1
exon-exon junction complex	0.40404	Cellular Component	1
cytoplasmic vesicle membrane	0.40404	Cellular Component	1
nucleosome	0.40404	Cellular Component	1
cytosolic large ribosomal subunit	0.40404	Cellular Component	1
interstitial matrix	0.40404	Cellular Component	1
cytolytic granule	0.40404	Cellular Component	1
striated muscle thin filament	0.40404	Cellular Component	1
proton-transporting two-sector ATPase complex, catalytic domain	0.40404	Cellular Component	1
COPII vesicle coat	0.40404	Cellular Component	1
TRAPPII protein complex	0.40404	Cellular Component	1
intercellular bridge	0.40404	Cellular Component	1
apical part of cell	0.40404	Cellular Component	1
actin filament bundle	0.40404	Cellular Component	1
apical plasma membrane	0.40404	Cellular Component	1
laminin-5 complex	0.40404	Cellular Component	1
mitochondrial membrane	0.40404	Cellular Component	1
Cajal body	0.40404	Cellular Component	1
ESCRT II complex	0.40404	Cellular Component	1
mitochondrial envelope	0.40404	Cellular Component	1
HAUS complex	0.40404	Cellular Component	1
glycine cleavage complex	0.40404	Cellular Component	1
synapse	0.40404	Cellular Component	1
receptor complex	0.40404	Cellular Component	1
exosome (RNase complex)	0.40404	Cellular Component	1
commitment complex	0.40404	Cellular Component	1
U2AF	0.40404	Cellular Component	1
U2-type catalytic step 1 spliceosome	0.40404	Cellular Component	1
actin filament	0.40404	Cellular Component	1
metal ion binding	72.7273	Molecular Function	180
zinc ion binding	44.4444	Molecular Function	110
ATP binding	44.0404	Molecular Function	109
nucleotide binding	35.1515	Molecular Function	87
transferase activity	30.7071	Molecular Function	76
DNA binding	30.303	Molecular Function	75
hydrolase activity	24.2424	Molecular Function	60
kinase activity	22.6263	Molecular Function	56
protein kinase activity	20.202	Molecular Function	50
DNA-binding transcription factor activity	19.3939	Molecular Function	48
actin binding	15.7576	Molecular Function	39
GTPase activator activity	15.3535	Molecular Function	38
sequence-specific DNA binding	14.5455	Molecular Function	36
nucleic acid binding	13.7374	Molecular Function	34
protein binding	13.3333	Molecular Function	33
calcium ion binding	12.9293	Molecular Function	32
catalytic activity	11.3131	Molecular Function	28
thiol-dependent ubiquitinyl hydrolase activity	10.101	Molecular Function	25
guanyl-nucleotide exchange factor activity	8.88889	Molecular Function	22
ligase activity	8.08081	Molecular Function	20
DNA-binding transcription factor activity, RNA polymerase II-specific	7.67677	Molecular Function	19
protein serine/threonine kinase activity	7.67677	Molecular Function	19
protein tyrosine phosphatase activity	7.27273	Molecular Function	18
phosphatase activity	7.27273	Molecular Function	18
transcription factor binding	6.86869	Molecular Function	17
protein serine/threonine phosphatase activity	6.46465	Molecular Function	16
chromatin binding	6.46465	Molecular Function	16
signaling receptor binding	6.46465	Molecular Function	16
RNA binding	6.46465	Molecular Function	16
UDP-N-acetylmuramoylalanyl-D-glutamyl-2,6-diaminopimelate-D-alanyl-D-alanine ligase activity	6.06061	Molecular Function	15
protein-glycine ligase activity, initiating	6.06061	Molecular Function	15
protein-glutamic acid ligase activity	6.06061	Molecular Function	15
ribosomal S6-glutamic acid ligase activity	6.06061	Molecular Function	15
protein-glycine ligase activity, elongating	6.06061	Molecular Function	15
coenzyme F420-2 alpha-glutamyl ligase activity	6.06061	Molecular Function	15
tubulin-glutamic acid ligase activity	6.06061	Molecular Function	15
coenzyme F420-0 gamma-glutamyl ligase activity	6.06061	Molecular Function	15
tubulin-glycine ligase activity	6.06061	Molecular Function	15
ubiquitin-protein transferase activity	6.06061	Molecular Function	15
protein-glycine ligase activity	6.06061	Molecular Function	15
transcription regulatory region DNA binding	5.65657	Molecular Function	14
protein tyrosine kinase activity	5.65657	Molecular Function	14
oxidoreductase activity	5.65657	Molecular Function	14
magnesium ion binding	5.65657	Molecular Function	14
transporter activity	5.25253	Molecular Function	13
phosphoprotein phosphatase activity	5.25253	Molecular Function	13
non-membrane spanning protein tyrosine kinase activity	5.25253	Molecular Function	13
double-stranded DNA binding	5.25253	Molecular Function	13
methyltransferase activity	5.25253	Molecular Function	13
Rab GTPase binding	4.84848	Molecular Function	12
RNA polymerase II proximal promoter sequence-specific DNA binding	4.84848	Molecular Function	12
protein dimerization activity	4.84848	Molecular Function	12
mRNA binding	4.44444	Molecular Function	11
semaphorin receptor activity	4.44444	Molecular Function	11
protein heterodimerization activity	4.44444	Molecular Function	11
ubiquitin protein ligase binding	4.44444	Molecular Function	11
GTPase regulator activity	4.44444	Molecular Function	11
structural constituent of ribosome	4.0404	Molecular Function	10
retinol binding	4.0404	Molecular Function	10
all-trans retinal binding	4.0404	Molecular Function	10
structural molecule activity	4.0404	Molecular Function	10
motor activity	4.0404	Molecular Function	10
retinoid binding	4.0404	Molecular Function	10
microtubule binding	4.0404	Molecular Function	10
retinoic acid binding	4.0404	Molecular Function	10
peptidase activity	4.0404	Molecular Function	10
enzyme binding	3.63636	Molecular Function	9
damaged DNA binding	3.63636	Molecular Function	9
calmodulin-dependent protein phosphatase activity	3.63636	Molecular Function	9
identical protein binding	3.63636	Molecular Function	9
microtubule motor activity	3.23232	Molecular Function	8
bile acid transmembrane transporter activity	3.23232	Molecular Function	8
sodium-independent organic anion transmembrane transporter activity	3.23232	Molecular Function	8
transcription coactivator activity	3.23232	Molecular Function	8
phosphatidylinositol-4,5-bisphosphate binding	3.23232	Molecular Function	8
GTP binding	3.23232	Molecular Function	8
protein homodimerization activity	3.23232	Molecular Function	8
phosphatidylserine binding	3.23232	Molecular Function	8
calcium-dependent protein serine/threonine phosphatase activity	2.82828	Molecular Function	7
single-stranded RNA binding	2.82828	Molecular Function	7
phosphatidylinositol phosphate kinase activity	2.82828	Molecular Function	7
drug binding	2.82828	Molecular Function	7
Rab guanyl-nucleotide exchange factor activity	2.82828	Molecular Function	7
calmodulin binding	2.82828	Molecular Function	7
p53 binding	2.82828	Molecular Function	7
RNA polymerase II regulatory region sequence-specific DNA binding	2.82828	Molecular Function	7
transcription coregulator activity	2.82828	Molecular Function	7
calcium channel activity	2.82828	Molecular Function	7
Rho guanyl-nucleotide exchange factor activity	2.82828	Molecular Function	7
double-stranded RNA binding	2.82828	Molecular Function	7
protein phosphatase 1 binding	2.82828	Molecular Function	7
protein tyrosine/serine/threonine phosphatase activity	2.82828	Molecular Function	7
protein binding, bridging	2.42424	Molecular Function	6
phosphoric diester hydrolase activity	2.42424	Molecular Function	6
ubiquitin-protein transferase activator activity	2.42424	Molecular Function	6
phospholipid binding	2.42424	Molecular Function	6
growth factor receptor binding	2.42424	Molecular Function	6
histone acetyltransferase activity	2.42424	Molecular Function	6
phosphatidylinositol phospholipase C activity	2.42424	Molecular Function	6
hormone receptor binding	2.42424	Molecular Function	6
carbohydrate binding	2.42424	Molecular Function	6
phosphothreonine residue binding	2.42424	Molecular Function	6
cyclin binding	2.42424	Molecular Function	6
histone-lysine N-methyltransferase activity	2.42424	Molecular Function	6
PDZ domain binding	2.0202	Molecular Function	5
translation repressor activity	2.0202	Molecular Function	5
ATPase activity	2.0202	Molecular Function	5
protein kinase regulator activity	2.0202	Molecular Function	5
6-phosphofructokinase activity	2.0202	Molecular Function	5
phosphatidylinositol binding	2.0202	Molecular Function	5
clathrin binding	2.0202	Molecular Function	5
SH3 domain binding	2.0202	Molecular Function	5
hydrolase activity, acting on glycosyl bonds	2.0202	Molecular Function	5
nuclease activity	1.61616	Molecular Function	4
GTPase activity	1.61616	Molecular Function	4
ubiquitin protein ligase activity	1.61616	Molecular Function	4
fatty-acyl-CoA binding	1.61616	Molecular Function	4
endonuclease activity	1.61616	Molecular Function	4
T/G mismatch-specific endonuclease activity	1.61616	Molecular Function	4
core promoter sequence-specific DNA binding	1.61616	Molecular Function	4
ligand-activated transcription factor activity	1.61616	Molecular Function	4
cortisol receptor activity	1.61616	Molecular Function	4
transferase activity, transferring glycosyl groups	1.61616	Molecular Function	4
hyalurononglucosaminidase activity	1.61616	Molecular Function	4
retroviral 3' processing activity	1.61616	Molecular Function	4
transcription regulatory region sequence-specific DNA binding	1.61616	Molecular Function	4
transmembrane receptor protein tyrosine kinase activity	1.61616	Molecular Function	4
ATPase-coupled phospholipid transporter activity	1.61616	Molecular Function	4
calcium channel regulator activity	1.61616	Molecular Function	4
phosphoric ester hydrolase activity	1.61616	Molecular Function	4
glucocorticoid receptor activity	1.61616	Molecular Function	4
steroid binding	1.61616	Molecular Function	4
single-stranded DNA endodeoxyribonuclease activity	1.61616	Molecular Function	4
steroid hormone binding	1.61616	Molecular Function	4
pyruvate kinase activity	1.21212	Molecular Function	3
heme binding	1.21212	Molecular Function	3
phenanthrene 3,4-monooxygenase activity	1.21212	Molecular Function	3
tetrahydrofuran hydroxylase activity	1.21212	Molecular Function	3
branched-chain dodecylbenzene sulfonate monooxygenase activity	1.21212	Molecular Function	3
limonene monooxygenase activity	1.21212	Molecular Function	3
dibenzothiophene monooxygenase activity	1.21212	Molecular Function	3
1-methylnaphthalene hydroxylase activity	1.21212	Molecular Function	3
NADPH:sulfur oxidoreductase activity	1.21212	Molecular Function	3
aminoacyl-tRNA ligase activity	1.21212	Molecular Function	3
ATP-dependent microtubule motor activity, plus-end-directed	1.21212	Molecular Function	3
isobutylamine N-hydroxylase activity	1.21212	Molecular Function	3
1-hydroxy-2-naphthoate hydroxylase activity	1.21212	Molecular Function	3
cyclin-dependent protein serine/threonine kinase regulator activity	1.21212	Molecular Function	3
3-HSA hydroxylase activity	1.21212	Molecular Function	3
chlorophenol 4-monooxygenase activity	1.21212	Molecular Function	3
cupric reductase activity	1.21212	Molecular Function	3
MAP kinase kinase kinase activity	1.21212	Molecular Function	3
mRNA 3'-UTR binding	1.21212	Molecular Function	3
FAD binding	1.21212	Molecular Function	3
xylene monooxygenase activity	1.21212	Molecular Function	3
phosphatidylinositol-4-phosphate binding	1.21212	Molecular Function	3
ferric-chelate reductase (NADPH) activity	1.21212	Molecular Function	3
4-nitrophenol 4-monooxygenase activity	1.21212	Molecular Function	3
syntaxin binding	1.21212	Molecular Function	3
dimethyl sulfide monooxygenase activity	1.21212	Molecular Function	3
bisphenol A hydroxylase A activity	1.21212	Molecular Function	3
potassium ion binding	1.21212	Molecular Function	3
transmembrane transporter activity	1.21212	Molecular Function	3
cell adhesion molecule binding	1.21212	Molecular Function	3
calcium-dependent phospholipid binding	1.21212	Molecular Function	3
unfolded protein binding	1.21212	Molecular Function	3
phenanthrene 1,2-monooxygenase activity	1.21212	Molecular Function	3
tocotrienol omega-hydroxylase activity	1.21212	Molecular Function	3
phenylacetate hydroxylase activity	1.21212	Molecular Function	3
2-oxo-delta3-4,5,5-trimethylcyclopentenylacetyl-CoA 1,2-monooxygenase activity	1.21212	Molecular Function	3
4-hydroxyphenylacetate,NADH:oxygen oxidoreductase (3-hydroxylating) activity	1.21212	Molecular Function	3
oxidoreductase activity, acting on paired donors, with incorporation or reduction of molecular oxygen, NAD(P)H as one donor, and incorporation of one atom of oxygen	1.21212	Molecular Function	3
ARF guanyl-nucleotide exchange factor activity	1.21212	Molecular Function	3
salicylate 5-hydroxylase activity	1.21212	Molecular Function	3
carbon disulfide oxygenase activity	1.21212	Molecular Function	3
ceramide binding	1.21212	Molecular Function	3
lipid binding	1.21212	Molecular Function	3
serine-type endopeptidase inhibitor activity	1.21212	Molecular Function	3
protein kinase binding	1.21212	Molecular Function	3
coreceptor activity	1.21212	Molecular Function	3
2-octaprenyl-3-methyl-6-methoxy-1,4-benzoquinol hydroxylase activity	1.21212	Molecular Function	3
toluene 4-monooxygenase activity	1.21212	Molecular Function	3
2-methylnaphthalene hydroxylase activity	1.21212	Molecular Function	3
6-hydroxy-3-methyl-2-oxo-1,2-dihydroquinoline 6-monooxygenase activity	1.21212	Molecular Function	3
3-(3-hydroxyphenyl)propionate hydroxylase activity	1.21212	Molecular Function	3
1-hydroxy-2-oxolimonene 1,2-monooxygenase activity	1.21212	Molecular Function	3
G protein-coupled receptor activity	1.21212	Molecular Function	3
alpha-pinene monooxygenase [NADH] activity	1.21212	Molecular Function	3
2-hydroxy-phenylacetate hydroxylase activity	1.21212	Molecular Function	3
ceramide transporter activity	1.21212	Molecular Function	3
phenanthrene 9,10-monooxygenase activity	1.21212	Molecular Function	3
phosphatase binding	1.21212	Molecular Function	3
protein phosphatase inhibitor activity	1.21212	Molecular Function	3
monooxygenase activity	1.21212	Molecular Function	3
4-hydroxypyridine-3-hydroxylase activity	1.21212	Molecular Function	3
proline-tRNA ligase activity	1.21212	Molecular Function	3
4-chlorobenzaldehyde oxidase activity	1.21212	Molecular Function	3
3,5-xylenol methylhydroxylase activity	1.21212	Molecular Function	3
thalianol hydroxylase activity	1.21212	Molecular Function	3
toluene 3-monooxygenase activity	1.21212	Molecular Function	3
3-methyl-2-oxo-1,2-dihydroquinoline 6-monooxygenase activity	1.21212	Molecular Function	3
toluene 2-monooxygenase activity	1.21212	Molecular Function	3
styrene monooxygenase activity	1.21212	Molecular Function	3
6-hydroxynicotinate 3-monooxygenase activity	1.21212	Molecular Function	3
hydroxymethylbilane synthase activity	1.21212	Molecular Function	3
peroxidase activity	1.21212	Molecular Function	3
toluene-4-sulfonate monooxygenase activity	1.21212	Molecular Function	3
glutamate-tRNA ligase activity	1.21212	Molecular Function	3
cAMP response element binding protein binding	1.21212	Molecular Function	3
toluene-sulfonate methyl-monooxygenase activity	1.21212	Molecular Function	3
calcium-dependent cysteine-type endopeptidase activity	0.808081	Molecular Function	2
pivalate-CoA ligase activity	0.808081	Molecular Function	2
steroid hormone receptor activity	0.808081	Molecular Function	2
chemorepellent activity	0.808081	Molecular Function	2
insulin-like growth factor II binding	0.808081	Molecular Function	2
benzoyl acetate-CoA ligase activity	0.808081	Molecular Function	2
gamma-aminobutyric acid:sodium symporter activity	0.808081	Molecular Function	2
actin filament binding	0.808081	Molecular Function	2
(3R)-3-isopropenyl-6-oxoheptanoate:CoA ligase (ADP-forming) activity	0.808081	Molecular Function	2
histone binding	0.808081	Molecular Function	2
lipid phosphatase activity	0.808081	Molecular Function	2
oxidoreductase activity, acting on the CH-CH group of donors, with a flavin as acceptor	0.808081	Molecular Function	2
inositol-1,3,4-trisphosphate 5-kinase activity	0.808081	Molecular Function	2
inositol tetrakisphosphate 1-kinase activity	0.808081	Molecular Function	2
magnesium ion transmembrane transporter activity	0.808081	Molecular Function	2
armadillo repeat domain binding	0.808081	Molecular Function	2
biliverdin reductase activity	0.808081	Molecular Function	2
1-phenanthrol glycosyltransferase activity	0.808081	Molecular Function	2
2-oxo-delta3-4,5,5-trimethylcyclopentenylacetyl-CoA synthetase activity	0.808081	Molecular Function	2
fatty acid ligase activity	0.808081	Molecular Function	2
3-isopropenyl-6-oxoheptanoyl-CoA synthetase activity	0.808081	Molecular Function	2
acid phosphatase activity	0.808081	Molecular Function	2
aryl-CoA synthetase (ADP-forming) activity	0.808081	Molecular Function	2
RNA polymerase II activating transcription factor binding	0.808081	Molecular Function	2
enhancer sequence-specific DNA binding	0.808081	Molecular Function	2
transferase activity, transferring acyl groups	0.808081	Molecular Function	2
iron-responsive element binding	0.808081	Molecular Function	2
perillic acid:CoA ligase (AMP-forming) activity	0.808081	Molecular Function	2
pristanate-CoA ligase activity	0.808081	Molecular Function	2
nuclear receptor activity	0.808081	Molecular Function	2
cis-2-methyl-5-isopropylhexa-2,5-dienoate-CoA ligase activity	0.808081	Molecular Function	2
4-alpha-glucanotransferase activity	0.808081	Molecular Function	2
electron transfer activity	0.808081	Molecular Function	2
phosphatidate phosphatase activity	0.808081	Molecular Function	2
cytoskeletal protein binding	0.808081	Molecular Function	2
ErbB-2 class receptor binding	0.808081	Molecular Function	2
ion channel binding	0.808081	Molecular Function	2
citronellyl-CoA ligase activity	0.808081	Molecular Function	2
adipate-CoA ligase activity	0.808081	Molecular Function	2
oxidoreductase activity, acting on the CH-CH group of donors	0.808081	Molecular Function	2
3-oxo-2-(2'-pentenyl)cyclopentane-1-octanoic acid CoA ligase activity	0.808081	Molecular Function	2
insulin-like growth factor binding	0.808081	Molecular Function	2
frizzled binding	0.808081	Molecular Function	2
malonyl-CoA synthetase activity	0.808081	Molecular Function	2
ion channel activity	0.808081	Molecular Function	2
succinate-CoA ligase activity	0.808081	Molecular Function	2
hydroxymethylglutaryl-CoA lyase activity	0.808081	Molecular Function	2
cation binding	0.808081	Molecular Function	2
cellulose synthase activity	0.808081	Molecular Function	2
branched-chain acyl-CoA synthetase (ADP-forming) activity	0.808081	Molecular Function	2
pantothenate kinase activity	0.808081	Molecular Function	2
insulin-like growth factor I binding	0.808081	Molecular Function	2
semaphorin receptor binding	0.808081	Molecular Function	2
neuropilin binding	0.808081	Molecular Function	2
dolichyl pyrophosphate Man7GlcNAc2 alpha-1,3-glucosyltransferase activity	0.808081	Molecular Function	2
potassium:chloride symporter activity	0.808081	Molecular Function	2
cysteine-type endopeptidase activity	0.808081	Molecular Function	2
oxidoreductase activity, acting on the CH-OH group of donors, NAD or NADP as acceptor	0.808081	Molecular Function	2
amylo-alpha-1,6-glucosidase activity	0.808081	Molecular Function	2
transferase activity, transferring acyl groups other than amino-acyl groups	0.808081	Molecular Function	2
L-serine transmembrane transporter activity	0.808081	Molecular Function	2
protein self-association	0.808081	Molecular Function	2
acyl-CoA ligase activity	0.808081	Molecular Function	2
adenosine deaminase activity	0.808081	Molecular Function	2
2-oxoglutarate-dependent dioxygenase activity	0.808081	Molecular Function	2
double-stranded RNA adenosine deaminase activity	0.808081	Molecular Function	2
extracellular matrix structural constituent	0.808081	Molecular Function	2
flavin adenine dinucleotide binding	0.808081	Molecular Function	2
phenanthrol glycosyltransferase activity	0.808081	Molecular Function	2
nicotinate-nucleotide diphosphorylase (carboxylating) activity	0.808081	Molecular Function	2
collagen binding	0.808081	Molecular Function	2
inositol phosphoceramide synthase activity	0.808081	Molecular Function	2
ATP-dependent RNA helicase activity	0.808081	Molecular Function	2
protein C-terminus binding	0.808081	Molecular Function	2
acyl-CoA dehydrogenase activity	0.808081	Molecular Function	2
3-hydroxypropionyl-CoA synthetase activity	0.808081	Molecular Function	2
perillic acid:CoA ligase (ADP-forming) activity	0.808081	Molecular Function	2
LIM domain binding	0.808081	Molecular Function	2
histone demethylase activity (H3-K27 specific)	0.808081	Molecular Function	2
2,4,4-trimethylpentanoate-CoA ligase activity	0.808081	Molecular Function	2
NAD binding	0.808081	Molecular Function	2
helicase activity	0.808081	Molecular Function	2
cyclopropanecarboxylate-CoA ligase activity	0.808081	Molecular Function	2
cation:chloride symporter activity	0.808081	Molecular Function	2
manganese ion binding	0.808081	Molecular Function	2
R-SMAD binding	0.808081	Molecular Function	2
trans-2-methyl-5-isopropylhexa-2,5-dienoate-CoA ligase activity	0.808081	Molecular Function	2
(3R)-3-isopropenyl-6-oxoheptanoate:CoA ligase (AMP-forming) activity	0.808081	Molecular Function	2
thiophene-2-carboxylate-CoA ligase activity	0.808081	Molecular Function	2
acetylgalactosaminyltransferase activity	0.808081	Molecular Function	2
inositol-1,4,5-trisphosphate 3-kinase activity	0.808081	Molecular Function	2
mentha-1,3-dione-CoA ligase activity	0.808081	Molecular Function	2
inositol-1,3,4-trisphosphate 6-kinase activity	0.808081	Molecular Function	2
protein phosphatase 2A binding	0.808081	Molecular Function	2
zinc ion transmembrane transporter activity	0.808081	Molecular Function	2
palmitoyl-CoA oxidase activity	0.808081	Molecular Function	2
isocitrate dehydrogenase (NAD+) activity	0.808081	Molecular Function	2
acyl-CoA oxidase activity	0.808081	Molecular Function	2
lyase activity	0.808081	Molecular Function	2
structural constituent of cytoskeleton	0.808081	Molecular Function	2
serine-type endopeptidase activity	0.808081	Molecular Function	2
protein-containing complex binding	0.808081	Molecular Function	2
serine-type peptidase activity	0.808081	Molecular Function	2
2,4-dichlorobenzoate-CoA ligase activity	0.808081	Molecular Function	2
sodium:proton antiporter activity	0.40404	Molecular Function	1
SUMO binding	0.40404	Molecular Function	1
glucuronosyltransferase activity	0.40404	Molecular Function	1
poly-pyrimidine tract binding	0.40404	Molecular Function	1
estradiol 17-beta-dehydrogenase activity	0.40404	Molecular Function	1
potassium:proton antiporter activity	0.40404	Molecular Function	1
peptide binding	0.40404	Molecular Function	1
ubiquitin binding	0.40404	Molecular Function	1
CDP-diacylglycerol-inositol 3-phosphatidyltransferase activity	0.40404	Molecular Function	1
phosphotransferase activity, phosphate group as acceptor	0.40404	Molecular Function	1
calcium activated cation channel activity	0.40404	Molecular Function	1
biotin-[acetyl-CoA-carboxylase] ligase activity	0.40404	Molecular Function	1
ribonucleoprotein complex binding	0.40404	Molecular Function	1
very long-chain fatty acid-CoA ligase activity	0.40404	Molecular Function	1
histone methyltransferase activity (H3-K4 specific)	0.40404	Molecular Function	1
biotin carboxylase activity	0.40404	Molecular Function	1
phosphatidylinositol-3,4-bisphosphate 4-phosphatase activity	0.40404	Molecular Function	1
G protein-coupled photoreceptor activity	0.40404	Molecular Function	1
iron ion transmembrane transporter activity	0.40404	Molecular Function	1
tropomyosin binding	0.40404	Molecular Function	1
prostaglandin-endoperoxide synthase activity	0.40404	Molecular Function	1
transferase activity, transferring acyl groups, acyl groups converted into alkyl on transfer	0.40404	Molecular Function	1
carbohydrate:proton symporter activity	0.40404	Molecular Function	1
sphingolipid delta-4 desaturase activity	0.40404	Molecular Function	1
inositol 1,4,5-trisphosphate-sensitive calcium-release channel activity	0.40404	Molecular Function	1
ethanolamine kinase activity	0.40404	Molecular Function	1
symporter activity	0.40404	Molecular Function	1
diacylglycerol O-acyltransferase activity	0.40404	Molecular Function	1
protein prenyltransferase activity	0.40404	Molecular Function	1
NAD+ ADP-ribosyltransferase activity	0.40404	Molecular Function	1
catalase activity	0.40404	Molecular Function	1
sulfiredoxin activity	0.40404	Molecular Function	1
chloride ion binding	0.40404	Molecular Function	1
phosphotransferase activity, for other substituted phosphate groups	0.40404	Molecular Function	1
long-chain fatty acid-CoA ligase activity	0.40404	Molecular Function	1
neurotransmitter:sodium symporter activity	0.40404	Molecular Function	1
actin monomer binding	0.40404	Molecular Function	1
(S)-2,3-di-O-geranylgeranylglyceryl phosphate synthase activity	0.40404	Molecular Function	1
delayed rectifier potassium channel activity	0.40404	Molecular Function	1
cysteine-type endopeptidase activator activity involved in apoptotic process	0.40404	Molecular Function	1
ubiquitin-specific protease binding	0.40404	Molecular Function	1
nucleoside transmembrane transporter activity	0.40404	Molecular Function	1
aminobutyraldehyde dehydrogenase activity	0.40404	Molecular Function	1
dolichyl pyrophosphate Glc1Man9GlcNAc2 alpha-1,3-glucosyltransferase activity	0.40404	Molecular Function	1
transketolase activity	0.40404	Molecular Function	1
voltage-gated chloride channel activity	0.40404	Molecular Function	1
alpha-1,2-galactosyltransferase activity	0.40404	Molecular Function	1
enzyme activator activity	0.40404	Molecular Function	1
myosin binding	0.40404	Molecular Function	1
cytokine binding	0.40404	Molecular Function	1
cytokine activity	0.40404	Molecular Function	1
eukaryotic initiation factor 4E binding	0.40404	Molecular Function	1
DNA-binding transcription activator activity, RNA polymerase II-specific	0.40404	Molecular Function	1
4-trimethylammoniobutyraldehyde dehydrogenase activity	0.40404	Molecular Function	1
agmatine aminopropyltransferase activity	0.40404	Molecular Function	1
beta-1,4-mannosylglycoprotein 4-beta-N-acetylglucosaminyltransferase activity	0.40404	Molecular Function	1
RNA cap binding	0.40404	Molecular Function	1
pre-mRNA 3'-splice site binding	0.40404	Molecular Function	1
1,4-dihydroxy-2-naphthoate octaprenyltransferase activity	0.40404	Molecular Function	1
7-dehydrocholesterol reductase activity	0.40404	Molecular Function	1
protein geranylgeranyltransferase activity	0.40404	Molecular Function	1
mRNA 5'-UTR binding	0.40404	Molecular Function	1
thiol-dependent ubiquitin-specific protease activity	0.40404	Molecular Function	1
beta-catenin binding	0.40404	Molecular Function	1
hedgehog receptor activity	0.40404	Molecular Function	1
nucleobase-containing compound kinase activity	0.40404	Molecular Function	1
transmembrane signaling receptor activity	0.40404	Molecular Function	1
protoheme IX farnesyltransferase activity	0.40404	Molecular Function	1
nucleotidyltransferase activity	0.40404	Molecular Function	1
1,2-dihydroxy-phenanthrene glycosyltransferase activity	0.40404	Molecular Function	1
ubiquitin conjugating enzyme binding	0.40404	Molecular Function	1
adenylate kinase activity	0.40404	Molecular Function	1
O-acyltransferase activity	0.40404	Molecular Function	1
protein kinase C activity	0.40404	Molecular Function	1
pyridoxal phosphate binding	0.40404	Molecular Function	1
cysteine-type peptidase activity	0.40404	Molecular Function	1
hyaluronic acid binding	0.40404	Molecular Function	1
protein disulfide isomerase activity	0.40404	Molecular Function	1
solute:proton antiporter activity	0.40404	Molecular Function	1
lysophospholipase activity	0.40404	Molecular Function	1
hydrolase activity, hydrolyzing O-glycosyl compounds	0.40404	Molecular Function	1
antiporter activity	0.40404	Molecular Function	1
1-phosphatidylinositol-3-kinase activity	0.40404	Molecular Function	1
endopeptidase activator activity	0.40404	Molecular Function	1
ATP dimethylallyltransferase activity	0.40404	Molecular Function	1
trans-pentaprenyltranstransferase activity	0.40404	Molecular Function	1
scavenger receptor activity	0.40404	Molecular Function	1
snoRNA binding	0.40404	Molecular Function	1
1-phosphatidylinositol-4-phosphate 3-kinase activity	0.40404	Molecular Function	1
protein kinase inhibitor activity	0.40404	Molecular Function	1
proton-transporting ATPase activity, rotational mechanism	0.40404	Molecular Function	1
phosphotyrosine residue binding	0.40404	Molecular Function	1
photoreceptor activity	0.40404	Molecular Function	1
type II transforming growth factor beta receptor binding	0.40404	Molecular Function	1
cadaverine aminopropyltransferase activity	0.40404	Molecular Function	1
9-phenanthrol UDP-glucuronosyltransferase activity	0.40404	Molecular Function	1
metalloaminopeptidase activity	0.40404	Molecular Function	1
antioxidant activity	0.40404	Molecular Function	1
acetyl-CoA carboxylase activity	0.40404	Molecular Function	1
protein kinase activator activity	0.40404	Molecular Function	1
fatty acid synthase activity	0.40404	Molecular Function	1
sphingosine hydroxylase activity	0.40404	Molecular Function	1
ephrin receptor binding	0.40404	Molecular Function	1
laminin binding	0.40404	Molecular Function	1
prenyltransferase activity	0.40404	Molecular Function	1
translation activator activity	0.40404	Molecular Function	1
cytochrome-c oxidase activity	0.40404	Molecular Function	1
GDP-dissociation inhibitor activity	0.40404	Molecular Function	1
filamin binding	0.40404	Molecular Function	1
SUMO-specific isopeptidase activity	0.40404	Molecular Function	1
isomerase activity	0.40404	Molecular Function	1
D-glucose transmembrane transporter activity	0.40404	Molecular Function	1
ADP dimethylallyltransferase activity	0.40404	Molecular Function	1
N-acetylglucosaminyl-proteoglycan 4-beta-glucuronosyltransferase activity	0.40404	Molecular Function	1
oxidoreductase activity, acting on the CH-CH group of donors, NAD or NADP as acceptor	0.40404	Molecular Function	1
4-hydroxybenzoate octaprenyltransferase activity	0.40404	Molecular Function	1

## Sheet: Cluster 22
GO_term	Percent	Function	Count
G2/M transition of mitotic cell cycle	87.1212	Biological Process	23
transport	87.1212	Biological Process	23
positive regulation of MAP kinase activity	87.1212	Biological Process	23
response to lipopolysaccharide	83.3333	Biological Process	22
positive regulation of apoptotic signaling pathway	79.5455	Biological Process	21
positive regulation of JNK cascade	79.5455	Biological Process	21
cell adhesion	53.0303	Biological Process	14
intracellular signal transduction	53.0303	Biological Process	14
transmembrane transport	37.8788	Biological Process	10
protein phosphorylation	37.8788	Biological Process	10
positive regulation of transcription by RNA polymerase II	37.8788	Biological Process	10
regulation of cell shape	34.0909	Biological Process	9
midbrain-hindbrain boundary morphogenesis	34.0909	Biological Process	9
positive regulation of gene expression	34.0909	Biological Process	9
signal transduction	34.0909	Biological Process	9
actin filament bundle distribution	34.0909	Biological Process	9
regulation of transcription, DNA-templated	34.0909	Biological Process	9
phosphorylation	30.303	Biological Process	8
eye development	30.303	Biological Process	8
response to drug	30.303	Biological Process	8
proteolysis	26.5152	Biological Process	7
muscle contraction	26.5152	Biological Process	7
translation	26.5152	Biological Process	7
peristalsis	26.5152	Biological Process	7
regulation of Rho protein signal transduction	26.5152	Biological Process	7
transcription, DNA-templated	22.7273	Biological Process	6
hemoglobin metabolic process	22.7273	Biological Process	6
erythrocyte differentiation	22.7273	Biological Process	6
ion transport	22.7273	Biological Process	6
chorismate metabolic process	22.7273	Biological Process	6
hemoglobin biosynthetic process	22.7273	Biological Process	6
oxidation-reduction process	22.7273	Biological Process	6
regulation of cell growth	22.7273	Biological Process	6
transmembrane receptor protein tyrosine kinase signaling pathway	22.7273	Biological Process	6
heme biosynthetic process	22.7273	Biological Process	6
negative regulation of canonical Wnt signaling pathway	22.7273	Biological Process	6
cell surface receptor signaling pathway	18.9394	Biological Process	5
phosphatidylinositol phosphorylation	18.9394	Biological Process	5
negative regulation of transcription by RNA polymerase II	18.9394	Biological Process	5
small GTPase mediated signal transduction	18.9394	Biological Process	5
positive regulation of transcription, DNA-templated	18.9394	Biological Process	5
protein stabilization	18.9394	Biological Process	5
G protein-coupled receptor signaling pathway	18.9394	Biological Process	5
heart development	18.9394	Biological Process	5
regulation of phosphatidylinositol 3-kinase activity	18.9394	Biological Process	5
multicellular organism development	18.9394	Biological Process	5
insulin receptor signaling pathway	18.9394	Biological Process	5
protein transport	18.9394	Biological Process	5
transcription by RNA polymerase II	15.1515	Biological Process	4
ephrin receptor signaling pathway	15.1515	Biological Process	4
microtubule cytoskeleton organization	15.1515	Biological Process	4
cortical actin cytoskeleton organization	15.1515	Biological Process	4
embryonic viscerocranium morphogenesis	15.1515	Biological Process	4
vesicle fusion	15.1515	Biological Process	4
JNK cascade	15.1515	Biological Process	4
Wnt signaling pathway, planar cell polarity pathway	15.1515	Biological Process	4
Wnt signaling pathway	15.1515	Biological Process	4
digestive tract development	15.1515	Biological Process	4
cell migration	15.1515	Biological Process	4
muscle organ development	15.1515	Biological Process	4
cytoskeletal anchoring at plasma membrane	15.1515	Biological Process	4
purine nucleotide metabolic process	15.1515	Biological Process	4
negative regulation of apoptotic process	15.1515	Biological Process	4
neuron differentiation	15.1515	Biological Process	4
angiotensin-activated signaling pathway	15.1515	Biological Process	4
heart looping	11.3636	Biological Process	3
myotube cell development	11.3636	Biological Process	3
macroautophagy	11.3636	Biological Process	3
positive regulation of apoptotic process	11.3636	Biological Process	3
positive regulation of cell migration	11.3636	Biological Process	3
axonogenesis	11.3636	Biological Process	3
neuronal stem cell population maintenance	11.3636	Biological Process	3
positive regulation of Notch signaling pathway	11.3636	Biological Process	3
cell morphogenesis	11.3636	Biological Process	3
inflammatory response	11.3636	Biological Process	3
ion transmembrane transport	11.3636	Biological Process	3
cytokine production	11.3636	Biological Process	3
cell cycle	11.3636	Biological Process	3
dorsal/ventral pattern formation	11.3636	Biological Process	3
calcineurin-NFAT signaling cascade	11.3636	Biological Process	3
cell division	11.3636	Biological Process	3
vesicle-mediated transport	11.3636	Biological Process	3
regulation of actin filament polymerization	11.3636	Biological Process	3
exocytosis	11.3636	Biological Process	3
intracellular protein transport	11.3636	Biological Process	3
positive regulation of cell morphogenesis involved in differentiation	11.3636	Biological Process	3
immune system process	11.3636	Biological Process	3
phosphatidylinositol dephosphorylation	11.3636	Biological Process	3
B cell receptor signaling pathway	11.3636	Biological Process	3
anaphase-promoting complex-dependent catabolic process	11.3636	Biological Process	3
glycolytic process	11.3636	Biological Process	3
neural crest cell differentiation	11.3636	Biological Process	3
cellular response to DNA damage stimulus	11.3636	Biological Process	3
retina morphogenesis in camera-type eye	11.3636	Biological Process	3
positive regulation of actin filament bundle assembly	11.3636	Biological Process	3
notochord development	11.3636	Biological Process	3
positive regulation of B cell proliferation	11.3636	Biological Process	3
cartilage morphogenesis	11.3636	Biological Process	3
regulation of BMP signaling pathway	11.3636	Biological Process	3
notochord cell differentiation	11.3636	Biological Process	3
positive regulation of myoblast fusion	11.3636	Biological Process	3
regulation of proteasomal protein catabolic process	11.3636	Biological Process	3
positive regulation of GTPase activity	11.3636	Biological Process	3
adaptive immune response	11.3636	Biological Process	3
intracellular transport of virus	7.57576	Biological Process	2
MAPK cascade	7.57576	Biological Process	2
mitotic anaphase	7.57576	Biological Process	2
T cell receptor signaling pathway	7.57576	Biological Process	2
canonical Wnt signaling pathway	7.57576	Biological Process	2
fibroblast growth factor receptor signaling pathway	7.57576	Biological Process	2
regulation of autophagy	7.57576	Biological Process	2
negative regulation of blood vessel endothelial cell proliferation involved in sprouting angiogenesis	7.57576	Biological Process	2
negative regulation of apoptotic cell clearance	7.57576	Biological Process	2
nucleotide-binding oligomerization domain containing signaling pathway	7.57576	Biological Process	2
positive regulation of NF-kappaB transcription factor activity	7.57576	Biological Process	2
neuron projection morphogenesis	7.57576	Biological Process	2
integrin-mediated signaling pathway	7.57576	Biological Process	2
ERBB2 signaling pathway	7.57576	Biological Process	2
developmental pigmentation	7.57576	Biological Process	2
positive regulation of canonical Wnt signaling pathway	7.57576	Biological Process	2
hemopoiesis	7.57576	Biological Process	2
actin cytoskeleton organization	7.57576	Biological Process	2
negative regulation of epidermal growth factor receptor signaling pathway	7.57576	Biological Process	2
proteasome-mediated ubiquitin-dependent protein catabolic process	7.57576	Biological Process	2
DNA damage response, signal transduction by p53 class mediator resulting in cell cycle arrest	7.57576	Biological Process	2
regulation of signal transduction by p53 class mediator	7.57576	Biological Process	2
positive regulation of wound healing	7.57576	Biological Process	2
outflow tract septum morphogenesis	7.57576	Biological Process	2
regulation of neuron death	7.57576	Biological Process	2
mitochondrion transport along microtubule	7.57576	Biological Process	2
regulation of insulin-like growth factor receptor signaling pathway	7.57576	Biological Process	2
negative regulation of transforming growth factor beta receptor signaling pathway	7.57576	Biological Process	2
stress-activated MAPK cascade	7.57576	Biological Process	2
negative regulation of cell migration involved in sprouting angiogenesis	7.57576	Biological Process	2
positive regulation of ERK1 and ERK2 cascade	7.57576	Biological Process	2
DNA ligation involved in DNA repair	7.57576	Biological Process	2
protein polyubiquitination	7.57576	Biological Process	2
digestive tract morphogenesis	7.57576	Biological Process	2
nucleotide-excision repair, DNA gap filling	7.57576	Biological Process	2
translesion synthesis	7.57576	Biological Process	2
cardiac muscle tissue development	7.57576	Biological Process	2
negative regulation of type I interferon production	7.57576	Biological Process	2
iridophore differentiation	7.57576	Biological Process	2
intrinsic apoptotic signaling pathway in response to hydrogen peroxide	7.57576	Biological Process	2
viral life cycle	7.57576	Biological Process	2
apoptotic process	7.57576	Biological Process	2
endothelial cell chemotaxis	7.57576	Biological Process	2
protein targeting to ER	7.57576	Biological Process	2
non-canonical Wnt signaling pathway	7.57576	Biological Process	2
regulation of necrotic cell death	7.57576	Biological Process	2
chaperone cofactor-dependent protein refolding	7.57576	Biological Process	2
determination of dorsal identity	7.57576	Biological Process	2
nucleotide-excision repair, DNA damage recognition	7.57576	Biological Process	2
nervous system development	7.57576	Biological Process	2
protein import into nucleus	7.57576	Biological Process	2
I-kappaB kinase/NF-kappaB signaling	7.57576	Biological Process	2
nucleotide-excision repair, DNA incision, 5'-to lesion	7.57576	Biological Process	2
regulation of transcription from RNA polymerase II promoter in response to hypoxia	7.57576	Biological Process	2
MyD88-independent toll-like receptor signaling pathway	7.57576	Biological Process	2
regulation of developmental pigmentation	7.57576	Biological Process	2
myeloid dendritic cell activation	7.57576	Biological Process	2
gluconeogenesis	7.57576	Biological Process	2
peptidyl-tyrosine dephosphorylation	7.57576	Biological Process	2
base-excision repair	7.57576	Biological Process	2
endothelial cell proliferation	7.57576	Biological Process	2
regulation of ion transmembrane transport	7.57576	Biological Process	2
positive regulation of interferon-alpha production	7.57576	Biological Process	2
cochlea morphogenesis	7.57576	Biological Process	2
heart contraction	7.57576	Biological Process	2
positive regulation of epidermal growth factor receptor signaling pathway	7.57576	Biological Process	2
innate immune response	7.57576	Biological Process	2
regulation of mRNA stability	7.57576	Biological Process	2
inositol phosphate dephosphorylation	7.57576	Biological Process	2
positive regulation of stress-activated MAPK cascade	7.57576	Biological Process	2
rhythmic process	7.57576	Biological Process	2
interstrand cross-link repair	7.57576	Biological Process	2
positive regulation of NIK/NF-kappaB signaling	7.57576	Biological Process	2
positive regulation of sprouting angiogenesis	7.57576	Biological Process	2
Golgi reassembly	7.57576	Biological Process	2
nucleotide-excision repair, DNA duplex unwinding	7.57576	Biological Process	2
activation of MAPK activity	7.57576	Biological Process	2
cytokinesis	7.57576	Biological Process	2
DNA damage response, detection of DNA damage	7.57576	Biological Process	2
mRNA processing	7.57576	Biological Process	2
regulation of polarized epithelial cell differentiation	7.57576	Biological Process	2
establishment of Golgi localization	7.57576	Biological Process	2
reactive oxygen species metabolic process	7.57576	Biological Process	2
membrane organization	7.57576	Biological Process	2
positive regulation of tumor necrosis factor production	7.57576	Biological Process	2
negative regulation of gene expression	7.57576	Biological Process	2
regulation of tumor necrosis factor-mediated signaling pathway	7.57576	Biological Process	2
glycogen biosynthetic process	7.57576	Biological Process	2
DNA geometric change	7.57576	Biological Process	2
ribosome biogenesis	7.57576	Biological Process	2
positive regulation of toll-like receptor 4 signaling pathway	7.57576	Biological Process	2
protein localization to endoplasmic reticulum	7.57576	Biological Process	2
error-free translesion synthesis	7.57576	Biological Process	2
neuron projection development	7.57576	Biological Process	2
wound healing, spreading of cells	7.57576	Biological Process	2
error-prone translesion synthesis	7.57576	Biological Process	2
positive regulation of interleukin-1 beta secretion	7.57576	Biological Process	2
non-canonical Wnt signaling pathway via JNK cascade	7.57576	Biological Process	2
regulation of apoptotic process	7.57576	Biological Process	2
mitotic G1 phase	7.57576	Biological Process	2
activation of protein kinase activity	7.57576	Biological Process	2
regulation of tolerance induction	7.57576	Biological Process	2
nucleotide-excision repair, DNA incision	7.57576	Biological Process	2
actin filament depolymerization	7.57576	Biological Process	2
Notch signaling pathway	7.57576	Biological Process	2
positive regulation of JUN kinase activity	7.57576	Biological Process	2
regulation of nucleotide-excision repair	7.57576	Biological Process	2
blood vessel lumenization	7.57576	Biological Process	2
positive regulation of innate immune response	7.57576	Biological Process	2
regulation of pentose-phosphate shunt	7.57576	Biological Process	2
positive regulation of glycogen catabolic process	7.57576	Biological Process	2
determination of left/right symmetry	7.57576	Biological Process	2
positive regulation of I-kappaB kinase/NF-kappaB signaling	7.57576	Biological Process	2
TRIF-dependent toll-like receptor signaling pathway	7.57576	Biological Process	2
positive regulation of toll-like receptor 2 signaling pathway	7.57576	Biological Process	2
positive regulation of myeloid cell differentiation	7.57576	Biological Process	2
positive regulation of intrinsic apoptotic signaling pathway by p53 class mediator	7.57576	Biological Process	2
chromatin assembly	7.57576	Biological Process	2
positive regulation of interleukin-6 production	7.57576	Biological Process	2
nucleotide-excision repair, preincision complex assembly	7.57576	Biological Process	2
dephosphorylation	7.57576	Biological Process	2
transcription-coupled nucleotide-excision repair	7.57576	Biological Process	2
endoderm development	7.57576	Biological Process	2
MyD88-dependent toll-like receptor signaling pathway	7.57576	Biological Process	2
heart morphogenesis	7.57576	Biological Process	2
regulation of mitochondrial membrane potential	7.57576	Biological Process	2
regulation of T cell mediated immune response to tumor cell	7.57576	Biological Process	2
stimulatory C-type lectin receptor signaling pathway	7.57576	Biological Process	2
positive regulation of cell population proliferation	7.57576	Biological Process	2
endosomal transport	7.57576	Biological Process	2
positive regulation of protein phosphorylation	7.57576	Biological Process	2
signal peptide processing	7.57576	Biological Process	2
positive regulation of interferon-beta production	7.57576	Biological Process	2
positive regulation of protein ubiquitination	7.57576	Biological Process	2
Fc-epsilon receptor signaling pathway	7.57576	Biological Process	2
regulation of type I interferon production	7.57576	Biological Process	2
NIK/NF-kappaB signaling	7.57576	Biological Process	2
plasmacytoid dendritic cell activation	7.57576	Biological Process	2
cellular protein metabolic process	7.57576	Biological Process	2
transforming growth factor beta receptor signaling pathway	7.57576	Biological Process	2
macrophage activation involved in immune response	7.57576	Biological Process	2
cellular response to interferon-gamma	7.57576	Biological Process	2
global genome nucleotide-excision repair	7.57576	Biological Process	2
axon guidance	7.57576	Biological Process	2
positive regulation of protein monoubiquitination	7.57576	Biological Process	2
virion assembly	7.57576	Biological Process	2
muscle cell development	7.57576	Biological Process	2
positive regulation of peptidyl-serine phosphorylation	7.57576	Biological Process	2
response to glucocorticoid	7.57576	Biological Process	2
lung development	7.57576	Biological Process	2
planar cell polarity pathway involved in neural tube closure	7.57576	Biological Process	2
neural tube closure	7.57576	Biological Process	2
tumor necrosis factor-mediated signaling pathway	7.57576	Biological Process	2
stabilization of membrane potential	3.78788	Biological Process	1
positive regulation of filopodium assembly	3.78788	Biological Process	1
central nervous system development	3.78788	Biological Process	1
peptidyl-serine phosphorylation	3.78788	Biological Process	1
sphingolipid biosynthetic process	3.78788	Biological Process	1
cellular response to hydrogen peroxide	3.78788	Biological Process	1
intestinal cholesterol absorption	3.78788	Biological Process	1
regulation of microtubule polymerization or depolymerization	3.78788	Biological Process	1
regulation of smoothened signaling pathway	3.78788	Biological Process	1
regulation of transcription by RNA polymerase II	3.78788	Biological Process	1
regulation of G1/S transition of mitotic cell cycle	3.78788	Biological Process	1
cell-cell adhesion involved in gastrulation	3.78788	Biological Process	1
NAD biosynthetic process	3.78788	Biological Process	1
spinal cord motor neuron differentiation	3.78788	Biological Process	1
regulation of cell population proliferation	3.78788	Biological Process	1
histone H4-K5 acetylation	3.78788	Biological Process	1
cellular response to estrogen stimulus	3.78788	Biological Process	1
glycolipid metabolic process	3.78788	Biological Process	1
cerebellar neuron development	3.78788	Biological Process	1
epiboly involved in gastrulation with mouth forming second	3.78788	Biological Process	1
embryonic hemopoiesis	3.78788	Biological Process	1
positive regulation of inositol phosphate biosynthetic process	3.78788	Biological Process	1
RNA export from nucleus	3.78788	Biological Process	1
anterior/posterior pattern specification	3.78788	Biological Process	1
plasma membrane repair	3.78788	Biological Process	1
endothelial to hematopoietic transition	3.78788	Biological Process	1
definitive hemopoiesis	3.78788	Biological Process	1
regulation of cellular response to growth factor stimulus	3.78788	Biological Process	1
habenula development	3.78788	Biological Process	1
neuron apoptotic process	3.78788	Biological Process	1
positive regulation of angiogenesis	3.78788	Biological Process	1
protein K11-linked ubiquitination	3.78788	Biological Process	1
Kupffer's vesicle development	3.78788	Biological Process	1
fin regeneration	3.78788	Biological Process	1
homophilic cell adhesion via plasma membrane adhesion molecules	3.78788	Biological Process	1
chondrocyte differentiation	3.78788	Biological Process	1
embryonic camera-type eye development	3.78788	Biological Process	1
actin filament severing	3.78788	Biological Process	1
RNA splicing	3.78788	Biological Process	1
regulation of chemokine activity	3.78788	Biological Process	1
myoblast fusion	3.78788	Biological Process	1
ribosomal large subunit export from nucleus	3.78788	Biological Process	1
actin nucleation	3.78788	Biological Process	1
intrinsic apoptotic signaling pathway by p53 class mediator	3.78788	Biological Process	1
protein folding	3.78788	Biological Process	1
neurogenesis	3.78788	Biological Process	1
GTP biosynthetic process	3.78788	Biological Process	1
spindle organization	3.78788	Biological Process	1
ubiquitin-dependent protein catabolic process	3.78788	Biological Process	1
nucleoside diphosphate phosphorylation	3.78788	Biological Process	1
protein localization	3.78788	Biological Process	1
negative regulation of cell differentiation	3.78788	Biological Process	1
cardiovascular system development	3.78788	Biological Process	1
peptidyl-cysteine S-trans-nitrosylation	3.78788	Biological Process	1
glucose metabolic process	3.78788	Biological Process	1
regulation of mitotic cell cycle	3.78788	Biological Process	1
carbohydrate transmembrane transport	3.78788	Biological Process	1
intracellular transport	3.78788	Biological Process	1
positive regulation of cyclin-dependent protein serine/threonine kinase activity	3.78788	Biological Process	1
regulation of MAP kinase activity	3.78788	Biological Process	1
UTP biosynthetic process	3.78788	Biological Process	1
carnitine metabolic process, CoA-linked	3.78788	Biological Process	1
vasculogenesis	3.78788	Biological Process	1
endoplasmic reticulum to Golgi vesicle-mediated transport	3.78788	Biological Process	1
rhombomere boundary formation	3.78788	Biological Process	1
insulin-like growth factor receptor signaling pathway	3.78788	Biological Process	1
translational initiation	3.78788	Biological Process	1
cell redox homeostasis	3.78788	Biological Process	1
tissue homeostasis	3.78788	Biological Process	1
fatty acid beta-oxidation using acyl-CoA dehydrogenase	3.78788	Biological Process	1
mRNA splicing, via spliceosome	3.78788	Biological Process	1
microtubule-based movement	3.78788	Biological Process	1
regulation of mitotic metaphase/anaphase transition	3.78788	Biological Process	1
anoikis	3.78788	Biological Process	1
carbohydrate metabolic process	3.78788	Biological Process	1
regulation of receptor recycling	3.78788	Biological Process	1
regulation of myeloid cell differentiation	3.78788	Biological Process	1
metal ion transport	3.78788	Biological Process	1
regulation of dendrite morphogenesis	3.78788	Biological Process	1
melanosome transport	3.78788	Biological Process	1
endocardial cell development	3.78788	Biological Process	1
nucleoside triphosphate biosynthetic process	3.78788	Biological Process	1
mitochondrial fission	3.78788	Biological Process	1
protein homooligomerization	3.78788	Biological Process	1
actin cytoskeleton reorganization	3.78788	Biological Process	1
mitochondrial respiratory chain complex III assembly	3.78788	Biological Process	1
malate metabolic process	3.78788	Biological Process	1
CTP biosynthetic process	3.78788	Biological Process	1
semicircular canal morphogenesis	3.78788	Biological Process	1
mitotic cell cycle	3.78788	Biological Process	1
chromosome segregation	3.78788	Biological Process	1
organ growth	3.78788	Biological Process	1
potassium ion transmembrane transport	3.78788	Biological Process	1
glycerol-3-phosphate catabolic process	3.78788	Biological Process	1
long-chain fatty acid catabolic process	3.78788	Biological Process	1
regulation of cell differentiation	3.78788	Biological Process	1
glycerol-3-phosphate metabolic process	3.78788	Biological Process	1
posttranscriptional tethering of RNA polymerase II gene DNA at nuclear periphery	3.78788	Biological Process	1
proteolysis involved in cellular protein catabolic process	3.78788	Biological Process	1
synaptic transmission, dopaminergic	3.78788	Biological Process	1
positive regulation of neutrophil differentiation	3.78788	Biological Process	1
histone H4-K16 acetylation	3.78788	Biological Process	1
positive regulation of proteasomal ubiquitin-dependent protein catabolic process	3.78788	Biological Process	1
positive regulation of endopeptidase activity	3.78788	Biological Process	1
actin filament organization	3.78788	Biological Process	1
regulation of cell proliferation involved in heart valve morphogenesis	3.78788	Biological Process	1
regulation of blood pressure	3.78788	Biological Process	1
ribosomal large subunit biogenesis	3.78788	Biological Process	1
histone H4-K8 acetylation	3.78788	Biological Process	1
immune response	3.78788	Biological Process	1
enteric nervous system development	3.78788	Biological Process	1
mitochondrial translational termination	3.78788	Biological Process	1
negative regulation of cell cycle	3.78788	Biological Process	1
zinc ion transport	3.78788	Biological Process	1
receptor localization to non-motile cilium	3.78788	Biological Process	1
lipid metabolic process	3.78788	Biological Process	1
cellular response to ionizing radiation	3.78788	Biological Process	1
cell projection organization	3.78788	Biological Process	1
regulation of cytoskeleton organization	3.78788	Biological Process	1
protein O-linked glycosylation	3.78788	Biological Process	1
regulation of neutrophil differentiation	3.78788	Biological Process	1
vasoconstriction	3.78788	Biological Process	1
regulation of exocytosis	3.78788	Biological Process	1
response to endoplasmic reticulum stress	3.78788	Biological Process	1
signaling	3.78788	Biological Process	1
ribosomal small subunit assembly	3.78788	Biological Process	1
myeloid cell differentiation	3.78788	Biological Process	1
dorsal/ventral axis specification	3.78788	Biological Process	1
pyrimidine nucleotide metabolic process	3.78788	Biological Process	1
positive regulation of MAPK cascade	3.78788	Biological Process	1
nuclear pore complex assembly	3.78788	Biological Process	1
endocytic recycling	3.78788	Biological Process	1
negative regulation of TOR signaling	3.78788	Biological Process	1
notochord morphogenesis	3.78788	Biological Process	1
ossification	3.78788	Biological Process	1
zinc ion homeostasis	3.78788	Biological Process	1
negative regulation of cell migration	3.78788	Biological Process	1
posttranscriptional regulation of gene expression	3.78788	Biological Process	1
G1/S transition of mitotic cell cycle	3.78788	Biological Process	1
mRNA export from nucleus	3.78788	Biological Process	1
protein autophosphorylation	3.78788	Biological Process	1
membrane raft localization	3.78788	Biological Process	1
vesicle docking	3.78788	Biological Process	1
glutathione metabolic process	3.78788	Biological Process	1
chordate embryonic development	3.78788	Biological Process	1
ceramide biosynthetic process	3.78788	Biological Process	1
actomyosin structure organization	3.78788	Biological Process	1
melanocyte migration	3.78788	Biological Process	1
mitochondrial translational elongation	3.78788	Biological Process	1
positive regulation of nuclear-transcribed mRNA catabolic process, deadenylation-dependent decay	3.78788	Biological Process	1
epithelial cell migration	3.78788	Biological Process	1
dorsal aorta development	3.78788	Biological Process	1
regulation of dephosphorylation	3.78788	Biological Process	1
positive regulation of endothelial cell migration	3.78788	Biological Process	1
endosome to lysosome transport	3.78788	Biological Process	1
chloride transport	3.78788	Biological Process	1
neurotrophin TRK receptor signaling pathway	3.78788	Biological Process	1
positive regulation of mitotic centrosome separation	3.78788	Biological Process	1
determination of heart left/right asymmetry	3.78788	Biological Process	1
lipid homeostasis	3.78788	Biological Process	1
apoptotic cell clearance	3.78788	Biological Process	1
camera-type eye development	3.78788	Biological Process	1
protein insertion into ER membrane	3.78788	Biological Process	1
cartilage development	3.78788	Biological Process	1
apoptotic signaling pathway	3.78788	Biological Process	1
proton transmembrane transport	3.78788	Biological Process	1
melanocyte differentiation	3.78788	Biological Process	1
Ras protein signal transduction	3.78788	Biological Process	1
endocardium morphogenesis	3.78788	Biological Process	1
B cell activation involved in immune response	3.78788	Biological Process	1
potassium ion transport	3.78788	Biological Process	1
barbed-end actin filament capping	3.78788	Biological Process	1
negative regulation of translation	3.78788	Biological Process	1
microtubule depolymerization	3.78788	Biological Process	1
spliceosomal complex assembly	3.78788	Biological Process	1
microtubule-based process	3.78788	Biological Process	1
blood vessel development	3.78788	Biological Process	1
endothelial tube morphogenesis	3.78788	Biological Process	1
cytoskeleton-dependent intracellular transport	3.78788	Biological Process	1
metabolic process	3.78788	Biological Process	1
regulation of signal transduction	3.78788	Biological Process	1
membrane depolarization during action potential	3.78788	Biological Process	1
cytoplasm	90.9091	Cellular Component	72
integral component of membrane	89.6465	Cellular Component	71
membrane	89.6465	Cellular Component	71
nucleus	35.3535	Cellular Component	28
cytoskeleton	34.0909	Cellular Component	27
early endosome	30.303	Cellular Component	24
perinuclear region of cytoplasm	30.303	Cellular Component	24
plasma membrane	27.7778	Cellular Component	22
brush border	23.9899	Cellular Component	19
cytosol	20.202	Cellular Component	16
endoplasmic reticulum	17.6768	Cellular Component	14
mitochondrion	17.6768	Cellular Component	14
extracellular exosome	16.4141	Cellular Component	13
mitochondrial inner membrane	16.4141	Cellular Component	13
myosin complex	13.8889	Cellular Component	11
extracellular region	12.6263	Cellular Component	10
intracellular	12.6263	Cellular Component	10
endoplasmic reticulum membrane	11.3636	Cellular Component	9
extracellular space	11.3636	Cellular Component	9
integral component of plasma membrane	11.3636	Cellular Component	9
collagen trimer	10.101	Cellular Component	8
extracellular matrix	10.101	Cellular Component	8
nucleoplasm	7.57576	Cellular Component	6
Golgi apparatus	7.57576	Cellular Component	6
extrinsic component of membrane	7.57576	Cellular Component	6
cytoplasmic microtubule	6.31313	Cellular Component	5
actin cytoskeleton	6.31313	Cellular Component	5
neuron projection	6.31313	Cellular Component	5
phosphatidylinositol 3-kinase complex	6.31313	Cellular Component	5
focal adhesion	5.05051	Cellular Component	4
SNARE complex	5.05051	Cellular Component	4
cell projection	5.05051	Cellular Component	4
cell-cell junction	5.05051	Cellular Component	4
nucleolus	3.78788	Cellular Component	3
transcription factor complex	3.78788	Cellular Component	3
axon	3.78788	Cellular Component	3
nuclear transcription factor complex	3.78788	Cellular Component	3
endosome membrane	3.78788	Cellular Component	3
npBAF complex	3.78788	Cellular Component	3
dendrite	3.78788	Cellular Component	3
endocytic vesicle membrane	2.52525	Cellular Component	2
nuclear envelope	2.52525	Cellular Component	2
cleavage furrow	2.52525	Cellular Component	2
glycosylphosphatidylinositol-N-acetylglucosaminyltransferase (GPI-GnT) complex	2.52525	Cellular Component	2
ribosome	2.52525	Cellular Component	2
nuclear chromatin	2.52525	Cellular Component	2
Golgi membrane	2.52525	Cellular Component	2
integrin complex	2.52525	Cellular Component	2
sarcoglycan complex	2.52525	Cellular Component	2
heterotrimeric G-protein complex	2.52525	Cellular Component	2
microtubule	2.52525	Cellular Component	2
sarcolemma	2.52525	Cellular Component	2
bicellular tight junction	2.52525	Cellular Component	2
signal peptidase complex	2.52525	Cellular Component	2
integral component of endoplasmic reticulum membrane	2.52525	Cellular Component	2
neuronal cell body	2.52525	Cellular Component	2
integral component of Golgi membrane	2.52525	Cellular Component	2
intracellular membrane-bounded organelle	2.52525	Cellular Component	2
ER membrane protein complex	2.52525	Cellular Component	2
cell surface	2.52525	Cellular Component	2
cell	2.52525	Cellular Component	2
glycerol-3-phosphate dehydrogenase complex	1.26263	Cellular Component	1
mitochondrial intermembrane space	1.26263	Cellular Component	1
chloride channel complex	1.26263	Cellular Component	1
U5 snRNP	1.26263	Cellular Component	1
cilium	1.26263	Cellular Component	1
BBSome	1.26263	Cellular Component	1
late endosome membrane	1.26263	Cellular Component	1
nuclear membrane	1.26263	Cellular Component	1
nuclear pore outer ring	1.26263	Cellular Component	1
endocytic vesicle	1.26263	Cellular Component	1
endoplasmic reticulum lumen	1.26263	Cellular Component	1
lysosomal membrane	1.26263	Cellular Component	1
chromatin	1.26263	Cellular Component	1
cytosolic small ribosomal subunit	1.26263	Cellular Component	1
respirasome	1.26263	Cellular Component	1
Golgi cisterna membrane	1.26263	Cellular Component	1
transcription factor TFIIA complex	1.26263	Cellular Component	1
kinesin complex	1.26263	Cellular Component	1
spliceosomal complex	1.26263	Cellular Component	1
lysosome	1.26263	Cellular Component	1
autophagosome	1.26263	Cellular Component	1
cortical actin cytoskeleton	1.26263	Cellular Component	1
centrosome	1.26263	Cellular Component	1
endomembrane system	1.26263	Cellular Component	1
nuclear pore	1.26263	Cellular Component	1
mitochondrial large ribosomal subunit	1.26263	Cellular Component	1
nuclear speck	1.26263	Cellular Component	1
histone acetyltransferase complex	1.26263	Cellular Component	1
mitochondrial outer membrane translocase complex	1.26263	Cellular Component	1
MLL1 complex	1.26263	Cellular Component	1
U4/U6 x U5 tri-snRNP complex	1.26263	Cellular Component	1
anchored component of membrane	1.26263	Cellular Component	1
microtubule cytoskeleton	1.26263	Cellular Component	1
late endosome	1.26263	Cellular Component	1
spindle	1.26263	Cellular Component	1
endosome	1.26263	Cellular Component	1
anaphase-promoting complex	1.26263	Cellular Component	1
varicosity	1.26263	Cellular Component	1
myelin sheath	1.26263	Cellular Component	1
proteasome complex	1.26263	Cellular Component	1
phagophore assembly site	1.26263	Cellular Component	1
cyclin-dependent protein kinase holoenzyme complex	1.26263	Cellular Component	1
actin binding	63.1313	Molecular Function	50
ATP binding	39.1414	Molecular Function	31
nucleotide binding	36.6162	Molecular Function	29
protein homodimerization activity	30.303	Molecular Function	24
protein heterodimerization activity	29.0404	Molecular Function	23
calcium ion binding	25.2525	Molecular Function	20
metal ion binding	23.9899	Molecular Function	19
GTP binding	16.4141	Molecular Function	13
motor activity	13.8889	Molecular Function	11
structural molecule activity	12.6263	Molecular Function	10
zinc ion binding	11.3636	Molecular Function	9
transferase activity	11.3636	Molecular Function	9
protein kinase activity	11.3636	Molecular Function	9
kinase activity	10.101	Molecular Function	8
calmodulin binding	10.101	Molecular Function	8
carbohydrate binding	10.101	Molecular Function	8
structural constituent of ribosome	10.101	Molecular Function	8
myosin binding	10.101	Molecular Function	8
DNA binding	10.101	Molecular Function	8
hydrolase activity	8.83838	Molecular Function	7
galactoside binding	8.83838	Molecular Function	7
Rho guanyl-nucleotide exchange factor activity	8.83838	Molecular Function	7
sequence-specific DNA binding	7.57576	Molecular Function	6
transmembrane receptor protein tyrosine kinase activity	7.57576	Molecular Function	6
protein tyrosine kinase activity	7.57576	Molecular Function	6
protein binding	7.57576	Molecular Function	6
DNA-binding transcription factor activity	7.57576	Molecular Function	6
transporter activity	7.57576	Molecular Function	6
nucleic acid binding	6.31313	Molecular Function	5
1-phosphatidylinositol-3-kinase regulator activity	6.31313	Molecular Function	5
protein serine/threonine kinase activity	6.31313	Molecular Function	5
GTPase activator activity	6.31313	Molecular Function	5
transcription factor binding	5.05051	Molecular Function	4
protein tyrosine kinase collagen receptor activity	5.05051	Molecular Function	4
oxidoreductase activity	5.05051	Molecular Function	4
microtubule binding	5.05051	Molecular Function	4
SNAP receptor activity	5.05051	Molecular Function	4
SNARE binding	5.05051	Molecular Function	4
RNA binding	5.05051	Molecular Function	4
catalytic activity	3.78788	Molecular Function	3
glutathione transferase activity	3.78788	Molecular Function	3
nuclear receptor transcription coactivator activity	3.78788	Molecular Function	3
G protein-coupled receptor activity	3.78788	Molecular Function	3
RNA polymerase II proximal promoter sequence-specific DNA binding	3.78788	Molecular Function	3
chromatin binding	3.78788	Molecular Function	3
guanylate kinase activity	3.78788	Molecular Function	3
peptidase activity	3.78788	Molecular Function	3
protein tyrosine phosphatase activity	3.78788	Molecular Function	3
phosphatase activity	3.78788	Molecular Function	3
GTPase activity	3.78788	Molecular Function	3
calcium-dependent phospholipid binding	3.78788	Molecular Function	3
actin filament binding	3.78788	Molecular Function	3
identical protein binding	3.78788	Molecular Function	3
NAD binding	3.78788	Molecular Function	3
transcription regulatory region DNA binding	3.78788	Molecular Function	3
protein kinase binding	3.78788	Molecular Function	3
bubble DNA binding	2.52525	Molecular Function	2
transmembrane signaling receptor activity	2.52525	Molecular Function	2
GDP binding	2.52525	Molecular Function	2
phosphatidylinositol binding	2.52525	Molecular Function	2
voltage-gated ion channel activity	2.52525	Molecular Function	2
phosphatidylinositol phosphate phosphatase activity	2.52525	Molecular Function	2
double-stranded RNA binding	2.52525	Molecular Function	2
signaling receptor binding	2.52525	Molecular Function	2
cytoskeletal protein binding	2.52525	Molecular Function	2
cytokine activity	2.52525	Molecular Function	2
extracellular matrix structural constituent	2.52525	Molecular Function	2
protein binding, bridging	2.52525	Molecular Function	2
frizzled binding	2.52525	Molecular Function	2
antioxidant activity	2.52525	Molecular Function	2
glutathione peroxidase activity	2.52525	Molecular Function	2
double-stranded DNA binding	2.52525	Molecular Function	2
insulin-like growth factor II binding	2.52525	Molecular Function	2
insulin-like growth factor I binding	2.52525	Molecular Function	2
supercoiled DNA binding	2.52525	Molecular Function	2
metalloendopeptidase activity	2.52525	Molecular Function	2
calcium-dependent protein kinase regulator activity	2.52525	Molecular Function	2
phosphatidylinositol N-acetylglucosaminyltransferase activity	2.52525	Molecular Function	2
beta-catenin binding	2.52525	Molecular Function	2
protein N-terminus binding	2.52525	Molecular Function	2
FFAT motif binding	2.52525	Molecular Function	2
protease binding	2.52525	Molecular Function	2
DNA binding, bending	2.52525	Molecular Function	2
isomerase activity	2.52525	Molecular Function	2
Rac GTPase binding	2.52525	Molecular Function	2
carboxypeptidase activity	2.52525	Molecular Function	2
insulin-like growth factor binding	2.52525	Molecular Function	2
protein kinase activator activity	2.52525	Molecular Function	2
electron transfer activity	2.52525	Molecular Function	2
2,3-bisphosphoglycerate-dependent phosphoglycerate mutase activity	2.52525	Molecular Function	2
four-way junction DNA binding	2.52525	Molecular Function	2
transferase activity, transferring phosphorus-containing groups	2.52525	Molecular Function	2
single-stranded RNA binding	2.52525	Molecular Function	2
3'-phosphoadenosine 5'-phosphosulfate transmembrane transporter activity	2.52525	Molecular Function	2
MAP kinase activity	2.52525	Molecular Function	2
cysteine-type peptidase activity	2.52525	Molecular Function	2
Ran GTPase binding	1.26263	Molecular Function	1
endopeptidase activator activity	1.26263	Molecular Function	1
magnesium ion binding	1.26263	Molecular Function	1
sphingolipid delta-4 desaturase activity	1.26263	Molecular Function	1
IDP phosphatase activity	1.26263	Molecular Function	1
oxidoreductase activity, acting on the CH-CH group of donors, with a flavin as acceptor	1.26263	Molecular Function	1
oxidoreductase activity, acting on the CH-NH2 group of donors, oxygen as acceptor	1.26263	Molecular Function	1
peptide hormone binding	1.26263	Molecular Function	1
dopamine neurotransmitter receptor activity, coupled via Gs	1.26263	Molecular Function	1
phosphatidic acid transporter activity	1.26263	Molecular Function	1
phosphoglycerate mutase activity	1.26263	Molecular Function	1
histone acetyltransferase activity (H4-K8 specific)	1.26263	Molecular Function	1
malic enzyme activity	1.26263	Molecular Function	1
glyceraldehyde-3-phosphate dehydrogenase (NAD+) (phosphorylating) activity	1.26263	Molecular Function	1
heme binding	1.26263	Molecular Function	1
lipid binding	1.26263	Molecular Function	1
phosphatidylinositol-4-phosphate phosphatase activity	1.26263	Molecular Function	1
phosphatidylinositol-3,5-bisphosphate 3-phosphatase activity	1.26263	Molecular Function	1
cysteine-type endopeptidase inhibitor activity involved in apoptotic process	1.26263	Molecular Function	1
epoxyqueuosine reductase activity	1.26263	Molecular Function	1
sulfur oxygenase reductase activity	1.26263	Molecular Function	1
ATPase binding	1.26263	Molecular Function	1
MAP kinase tyrosine/serine/threonine phosphatase activity	1.26263	Molecular Function	1
inositol phosphate phosphatase activity	1.26263	Molecular Function	1
endothelin receptor activity	1.26263	Molecular Function	1
NADP phosphatase activity	1.26263	Molecular Function	1
histone acetyltransferase activity (H4-K16 specific)	1.26263	Molecular Function	1
inositol-3,4-bisphosphate 4-phosphatase activity	1.26263	Molecular Function	1
long-chain-acyl-CoA dehydrogenase activity	1.26263	Molecular Function	1
peptidyl-cysteine S-nitrosylase activity	1.26263	Molecular Function	1
potassium ion leak channel activity	1.26263	Molecular Function	1
dopamine binding	1.26263	Molecular Function	1
metallopeptidase activity	1.26263	Molecular Function	1
NADPH:sulfur oxidoreductase activity	1.26263	Molecular Function	1
oxidoreductase activity, acting on the CH-OH group of donors, NAD or NADP as acceptor	1.26263	Molecular Function	1
NADP binding	1.26263	Molecular Function	1
parathyroid hormone receptor activity	1.26263	Molecular Function	1
fibronectin binding	1.26263	Molecular Function	1
inositol-4,5-bisphosphate 5-phosphatase activity	1.26263	Molecular Function	1
tubulin binding	1.26263	Molecular Function	1
protein tyrosine/serine/threonine phosphatase activity	1.26263	Molecular Function	1
phosphatidylinositol-3,5-bisphosphate 5-phosphatase activity	1.26263	Molecular Function	1
p53 binding	1.26263	Molecular Function	1
inositol-1,3,4,5,6-pentakisphosphate 1-phosphatase activity	1.26263	Molecular Function	1
tumor necrosis factor-activated receptor activity	1.26263	Molecular Function	1
reduced coenzyme F420 dehydrogenase activity	1.26263	Molecular Function	1
NAADP-sensitive calcium-release channel activity	1.26263	Molecular Function	1
chloride channel activity	1.26263	Molecular Function	1
ubiquinol-cytochrome-c reductase activity	1.26263	Molecular Function	1
UDP-glucosyltransferase activity	1.26263	Molecular Function	1
microtubule motor activity	1.26263	Molecular Function	1
mitogen-activated protein kinase kinase binding	1.26263	Molecular Function	1
inositol-1,3,4,5,6-pentakisphosphate 3-phosphatase activity	1.26263	Molecular Function	1
transcription coactivator activity	1.26263	Molecular Function	1
glycerol-3-phosphate dehydrogenase [NAD+] activity	1.26263	Molecular Function	1
nicotinate-nucleotide diphosphorylase (carboxylating) activity	1.26263	Molecular Function	1
malolactic enzyme activity	1.26263	Molecular Function	1
protein tyrosine/threonine phosphatase activity	1.26263	Molecular Function	1
inositol bisphosphate phosphatase activity	1.26263	Molecular Function	1
calcium-dependent cysteine-type endopeptidase activity	1.26263	Molecular Function	1
metal ion transmembrane transporter activity	1.26263	Molecular Function	1
inositol-1,3,4-trisphosphate 4-phosphatase activity	1.26263	Molecular Function	1
DNA-binding transcription factor activity, RNA polymerase II-specific	1.26263	Molecular Function	1
inositol-1,3,4,6-tetrakisphosphate 6-phosphatase activity	1.26263	Molecular Function	1
translation initiation factor activity	1.26263	Molecular Function	1
metallocarboxypeptidase activity	1.26263	Molecular Function	1
phosphatidylinositol-1,4,5-trisphosphate 5-phosphatase activity	1.26263	Molecular Function	1
zinc ion transmembrane transporter activity	1.26263	Molecular Function	1
palmitoyl-CoA oxidase activity	1.26263	Molecular Function	1
ion transmembrane transporter activity	1.26263	Molecular Function	1
phosphatidylinositol 3-kinase binding	1.26263	Molecular Function	1
nucleoside diphosphate kinase activity	1.26263	Molecular Function	1
structural constituent of cytoskeleton	1.26263	Molecular Function	1
UDP-xylosyltransferase activity	1.26263	Molecular Function	1
phosphoric ester hydrolase activity	1.26263	Molecular Function	1
potassium channel activity	1.26263	Molecular Function	1
oxidoreductase activity, acting on the aldehyde or oxo group of donors, NAD or NADP as acceptor	1.26263	Molecular Function	1
histone acetyltransferase activity (H4-K5 specific)	1.26263	Molecular Function	1
serine-type carboxypeptidase activity	1.26263	Molecular Function	1
ATP-dependent microtubule motor activity, plus-end-directed	1.26263	Molecular Function	1
ATPase activity	1.26263	Molecular Function	1
ion channel activity	1.26263	Molecular Function	1
5-amino-6-(5-phosphoribitylamino)uracil phosphatase activity	1.26263	Molecular Function	1
N-ethylmaleimide reductase activity	1.26263	Molecular Function	1
inositol-1,3,4-trisphosphate 1-phosphatase activity	1.26263	Molecular Function	1
copper ion binding	1.26263	Molecular Function	1
guanyl-nucleotide exchange factor activity	1.26263	Molecular Function	1
protein phosphatase 2A binding	1.26263	Molecular Function	1
cofactor binding	1.26263	Molecular Function	1
flavin adenine dinucleotide binding	1.26263	Molecular Function	1
intramolecular transferase activity, phosphotransferases	1.26263	Molecular Function	1
inositol-1,4,5,6-tetrakisphosphate 6-phosphatase activity	1.26263	Molecular Function	1
voltage-gated calcium channel activity	1.26263	Molecular Function	1
protein disulfide isomerase activity	1.26263	Molecular Function	1
JUN kinase phosphatase activity	1.26263	Molecular Function	1
Edg-2 lysophosphatidic acid receptor binding	1.26263	Molecular Function	1
ephrin receptor binding	1.26263	Molecular Function	1
fatty-acyl-CoA binding	1.26263	Molecular Function	1
transmembrane receptor protein phosphatase activity	1.26263	Molecular Function	1
ubiquitin protein ligase binding	1.26263	Molecular Function	1
ubiquitin binding	1.26263	Molecular Function	1
insulin receptor substrate binding	1.26263	Molecular Function	1
malate dehydrogenase (decarboxylating) (NAD+) activity	1.26263	Molecular Function	1
inositol-1,3,4,6-tetrakisphosphate 1-phosphatase activity	1.26263	Molecular Function	1
structural constituent of nuclear pore	1.26263	Molecular Function	1

## Sheet: Cluster 24
GO_term	Percent	Function	Count
regulation of transcription, DNA-templated	94.2216	Biological Process	64
positive regulation of transcription by RNA polymerase II	85.3883	Biological Process	58
signal transduction	72.1384	Biological Process	49
Wnt signaling pathway	63.3051	Biological Process	43
protein phosphorylation	61.8329	Biological Process	42
heart development	60.3607	Biological Process	41
negative regulation of transcription by RNA polymerase II	58.8885	Biological Process	40
endocytosis	57.4163	Biological Process	39
regulation of transcription by RNA polymerase II	55.9441	Biological Process	38
chordate embryonic development	54.4718	Biological Process	37
negative regulation of extrinsic apoptotic signaling pathway	47.1108	Biological Process	32
phosphorylation	47.1108	Biological Process	32
blood vessel development	45.6386	Biological Process	31
transport	44.1664	Biological Process	30
small GTPase mediated signal transduction	42.6941	Biological Process	29
canonical Wnt signaling pathway	41.2219	Biological Process	28
multicellular organism development	41.2219	Biological Process	28
transcription, DNA-templated	39.7497	Biological Process	27
muscle organ development	38.2775	Biological Process	26
negative regulation of DNA-binding transcription factor activity	36.8053	Biological Process	25
intestinal epithelial structure maintenance	35.3331	Biological Process	24
intracellular signal transduction	35.3331	Biological Process	24
cell population proliferation	35.3331	Biological Process	24
metabolic process	35.3331	Biological Process	24
positive regulation of protein export from nucleus	35.3331	Biological Process	24
negative regulation of canonical Wnt signaling pathway	33.8609	Biological Process	23
habenula development	33.8609	Biological Process	23
Wnt signaling pathway involved in digestive tract morphogenesis	33.8609	Biological Process	23
fat cell differentiation	33.8609	Biological Process	23
determination of left/right asymmetry in diencephalon	33.8609	Biological Process	23
cell cycle arrest	33.8609	Biological Process	23
positive regulation of insulin secretion	32.3887	Biological Process	22
positive regulation of heparan sulfate proteoglycan biosynthetic process	32.3887	Biological Process	22
glucose homeostasis	32.3887	Biological Process	22
maintenance of DNA repeat elements	32.3887	Biological Process	22
negative regulation of type B pancreatic cell apoptotic process	32.3887	Biological Process	22
regulation of hormone metabolic process	32.3887	Biological Process	22
myoblast fate commitment	32.3887	Biological Process	22
muscle fiber development	32.3887	Biological Process	22
positive regulation of protein kinase B signaling	32.3887	Biological Process	22
positive regulation of protein binding	32.3887	Biological Process	22
canonical Wnt signaling pathway involved in positive regulation of epithelial to mesenchymal transition	32.3887	Biological Process	22
regulation of smooth muscle cell proliferation	32.3887	Biological Process	22
negative regulation of transcription, DNA-templated	30.9165	Biological Process	21
eye development	30.9165	Biological Process	21
proteolysis	29.4442	Biological Process	20
peptidyl-serine phosphorylation	26.4998	Biological Process	18
cell migration	26.4998	Biological Process	18
cell surface receptor signaling pathway	26.4998	Biological Process	18
intracellular protein transport	25.0276	Biological Process	17
regulation of cell shape	25.0276	Biological Process	17
neurogenesis	23.5554	Biological Process	16
cell adhesion	23.5554	Biological Process	16
protein glycosylation	22.0832	Biological Process	15
autophagy	22.0832	Biological Process	15
muscle structure development	22.0832	Biological Process	15
convergent extension	22.0832	Biological Process	15
protein dephosphorylation	20.611	Biological Process	14
determination of left/right symmetry	20.611	Biological Process	14
autophagosome assembly	20.611	Biological Process	14
positive regulation of cell migration	19.1388	Biological Process	13
regulation of signal transduction	19.1388	Biological Process	13
ion transport	19.1388	Biological Process	13
positive regulation of transcription, DNA-templated	19.1388	Biological Process	13
protein N-linked glycosylation via asparagine	17.6665	Biological Process	12
nucleosome disassembly	17.6665	Biological Process	12
ATP-dependent chromatin remodeling	17.6665	Biological Process	12
oligosaccharide metabolic process	17.6665	Biological Process	12
BMP signaling pathway	17.6665	Biological Process	12
positive regulation of BMP signaling pathway	17.6665	Biological Process	12
nervous system development	17.6665	Biological Process	12
ganglioside biosynthetic process	17.6665	Biological Process	12
neural crest cell migration	17.6665	Biological Process	12
positive regulation of pathway-restricted SMAD protein phosphorylation	16.1943	Biological Process	11
dorsal/ventral pattern formation	16.1943	Biological Process	11
protein transport	16.1943	Biological Process	11
G protein-coupled receptor signaling pathway	16.1943	Biological Process	11
G1/S transition of mitotic cell cycle	16.1943	Biological Process	11
pharyngeal system development	16.1943	Biological Process	11
germ cell development	16.1943	Biological Process	11
positive regulation of gene expression	16.1943	Biological Process	11
positive regulation of GTPase activity	14.7221	Biological Process	10
smooth muscle cell differentiation	14.7221	Biological Process	10
somitogenesis	14.7221	Biological Process	10
transforming growth factor beta receptor signaling pathway	14.7221	Biological Process	10
insulin receptor signaling pathway	14.7221	Biological Process	10
positive regulation of signal transduction	14.7221	Biological Process	10
oxidation-reduction process	14.7221	Biological Process	10
phosphatidylinositol phosphorylation	14.7221	Biological Process	10
gastrulation with mouth forming second	14.7221	Biological Process	10
angiogenesis	14.7221	Biological Process	10
dephosphorylation	14.7221	Biological Process	10
positive regulation of epithelial to mesenchymal transition	13.2499	Biological Process	9
signal transduction by protein phosphorylation	13.2499	Biological Process	9
pathway-restricted SMAD protein phosphorylation	13.2499	Biological Process	9
cardiac epithelial to mesenchymal transition	13.2499	Biological Process	9
cardiac muscle cell fate commitment	13.2499	Biological Process	9
peptidyl-threonine phosphorylation	13.2499	Biological Process	9
endocardial cushion cell fate commitment	13.2499	Biological Process	9
negative regulation of activin receptor signaling pathway	13.2499	Biological Process	9
microtubule-based movement	13.2499	Biological Process	9
branching involved in blood vessel morphogenesis	13.2499	Biological Process	9
positive regulation of alkaline phosphatase activity	13.2499	Biological Process	9
embryonic eye morphogenesis	13.2499	Biological Process	9
cell migration involved in gastrulation	13.2499	Biological Process	9
translation	13.2499	Biological Process	9
positive regulation of bone mineralization	13.2499	Biological Process	9
embryonic heart tube morphogenesis	13.2499	Biological Process	9
acute inflammatory response	13.2499	Biological Process	9
DNA replication	13.2499	Biological Process	9
cell division	13.2499	Biological Process	9
endothelial cell activation	13.2499	Biological Process	9
positive regulation of osteoblast differentiation	13.2499	Biological Process	9
cell cycle	13.2499	Biological Process	9
mesoderm formation	13.2499	Biological Process	9
atrial septum primum morphogenesis	13.2499	Biological Process	9
mitral valve morphogenesis	13.2499	Biological Process	9
positive regulation of determination of dorsal identity	13.2499	Biological Process	9
innate immune response	13.2499	Biological Process	9
activin receptor signaling pathway	13.2499	Biological Process	9
mesenchymal cell differentiation	13.2499	Biological Process	9
immune system process	11.7777	Biological Process	8
adaptive immune response	11.7777	Biological Process	8
chondrocyte differentiation	11.7777	Biological Process	8
regulation of phosphatidylinositol 3-kinase activity	11.7777	Biological Process	8
vesicle-mediated transport	11.7777	Biological Process	8
regulation of natural killer cell activation	11.7777	Biological Process	8
spermatogenesis	11.7777	Biological Process	8
nucleotide biosynthetic process	11.7777	Biological Process	8
lipid metabolic process	11.7777	Biological Process	8
positive regulation of apoptotic process	11.7777	Biological Process	8
kidney development	10.3055	Biological Process	7
regulation of apoptotic process	10.3055	Biological Process	7
myofibril assembly	10.3055	Biological Process	7
skeletal system development	10.3055	Biological Process	7
regulation of cell population proliferation	10.3055	Biological Process	7
cell differentiation	10.3055	Biological Process	7
axonogenesis	10.3055	Biological Process	7
heart looping	10.3055	Biological Process	7
mitochondrial outer membrane permeabilization	10.3055	Biological Process	7
glial cell differentiation	10.3055	Biological Process	7
brain development	10.3055	Biological Process	7
vesicle organization	8.83327	Biological Process	6
anterior commissure morphogenesis	8.83327	Biological Process	6
alpha-linolenic acid metabolic process	8.83327	Biological Process	6
linoleic acid metabolic process	8.83327	Biological Process	6
ribonucleoside monophosphate biosynthetic process	8.83327	Biological Process	6
type II pneumocyte differentiation	8.83327	Biological Process	6
commissural neuron axon guidance	8.83327	Biological Process	6
Kupffer's vesicle development	8.83327	Biological Process	6
retina development in camera-type eye	8.83327	Biological Process	6
calcium ion transport	8.83327	Biological Process	6
sarcomere organization	8.83327	Biological Process	6
membrane protein proteolysis	8.83327	Biological Process	6
axon guidance	8.83327	Biological Process	6
response to hypoxia	8.83327	Biological Process	6
lung ciliated cell differentiation	8.83327	Biological Process	6
embryonic cranial skeleton morphogenesis	8.83327	Biological Process	6
protein homooligomerization	8.83327	Biological Process	6
exocytosis	8.83327	Biological Process	6
principal sensory nucleus of trigeminal nerve development	8.83327	Biological Process	6
cartilage development	8.83327	Biological Process	6
unsaturated fatty acid biosynthetic process	8.83327	Biological Process	6
protein ubiquitination	8.83327	Biological Process	6
Clara cell differentiation	8.83327	Biological Process	6
signal peptide processing	8.83327	Biological Process	6
negative regulation of epithelial cell proliferation involved in lung morphogenesis	8.83327	Biological Process	6
carbohydrate metabolic process	8.83327	Biological Process	6
positive regulation of programmed cell death	8.83327	Biological Process	6
type I pneumocyte differentiation	8.83327	Biological Process	6
peptide catabolic process	8.83327	Biological Process	6
negative regulation of mesenchymal cell proliferation involved in lung development	8.83327	Biological Process	6
transmembrane transport	8.83327	Biological Process	6
RNA secondary structure unwinding	8.83327	Biological Process	6
negative regulation of apoptotic process	7.36106	Biological Process	5
cellular calcium ion homeostasis	7.36106	Biological Process	5
digestive tract development	7.36106	Biological Process	5
cellular response to hormone stimulus	7.36106	Biological Process	5
histone deacetylation	7.36106	Biological Process	5
substantia nigra development	7.36106	Biological Process	5
cytokine-mediated signaling pathway	7.36106	Biological Process	5
response to mechanical stimulus	7.36106	Biological Process	5
axonal fasciculation	7.36106	Biological Process	5
negative regulation of receptor signaling pathway via JAK-STAT	7.36106	Biological Process	5
maintenance of epithelial cell apical/basal polarity	7.36106	Biological Process	5
regulation of cell growth	7.36106	Biological Process	5
protein stabilization	7.36106	Biological Process	5
actin cytoskeleton reorganization	7.36106	Biological Process	5
RNA splicing	5.88885	Biological Process	4
integrin-mediated signaling pathway	5.88885	Biological Process	4
cell redox homeostasis	5.88885	Biological Process	4
regulation of vascular endothelial growth factor receptor signaling pathway	5.88885	Biological Process	4
retrograde transport, endosome to Golgi	5.88885	Biological Process	4
fin regeneration	5.88885	Biological Process	4
response to lipopolysaccharide	5.88885	Biological Process	4
skeletal muscle fiber development	5.88885	Biological Process	4
regulation of GTPase activity	5.88885	Biological Process	4
translational elongation	5.88885	Biological Process	4
intrinsic apoptotic signaling pathway in response to endoplasmic reticulum stress	5.88885	Biological Process	4
hemopoiesis	5.88885	Biological Process	4
DNA methylation	5.88885	Biological Process	4
dorsal/ventral axis specification	5.88885	Biological Process	4
drug metabolic process	5.88885	Biological Process	4
neuron migration	5.88885	Biological Process	4
regulation of MAPK cascade	5.88885	Biological Process	4
regulation of neuron apoptotic process	5.88885	Biological Process	4
embryonic viscerocranium morphogenesis	5.88885	Biological Process	4
cardiac muscle cell development	5.88885	Biological Process	4
homophilic cell adhesion via plasma membrane adhesion molecules	5.88885	Biological Process	4
transmembrane receptor protein tyrosine kinase signaling pathway	5.88885	Biological Process	4
retinal pigment epithelium development	5.88885	Biological Process	4
protein processing	5.88885	Biological Process	4
protein localization to basolateral plasma membrane	5.88885	Biological Process	4
convergent extension involved in axis elongation	5.88885	Biological Process	4
cytoplasmic mRNA processing body assembly	5.88885	Biological Process	4
neurotransmitter secretion	5.88885	Biological Process	4
inflammatory response	5.88885	Biological Process	4
motor neuron axon guidance	5.88885	Biological Process	4
regulation of lipid biosynthetic process	5.88885	Biological Process	4
transmembrane receptor protein serine/threonine kinase signaling pathway	5.88885	Biological Process	4
regulation of alternative mRNA splicing, via spliceosome	5.88885	Biological Process	4
cellular response to amino acid stimulus	5.88885	Biological Process	4
negative regulation of smoothened signaling pathway	5.88885	Biological Process	4
venous blood vessel development	4.41664	Biological Process	3
muscle cell cellular homeostasis	4.41664	Biological Process	3
IMP metabolic process	4.41664	Biological Process	3
regulation of synaptic plasticity by receptor localization to synapse	4.41664	Biological Process	3
midbrain-hindbrain boundary morphogenesis	4.41664	Biological Process	3
blood vessel lumenization	4.41664	Biological Process	3
transcription initiation from RNA polymerase III promoter	4.41664	Biological Process	3
camera-type eye development	4.41664	Biological Process	3
maturation of LSU-rRNA	4.41664	Biological Process	3
determination of ventral identity	4.41664	Biological Process	3
maturation of 5.8S rRNA	4.41664	Biological Process	3
filopodium assembly	4.41664	Biological Process	3
retina morphogenesis in camera-type eye	4.41664	Biological Process	3
calcium ion transmembrane transport	4.41664	Biological Process	3
L-ascorbic acid transmembrane transport	4.41664	Biological Process	3
phototransduction, visible light	4.41664	Biological Process	3
smoothened signaling pathway	4.41664	Biological Process	3
actin filament bundle distribution	4.41664	Biological Process	3
cytoplasmic microtubule organization	4.41664	Biological Process	3
regulation of endocytosis	4.41664	Biological Process	3
positive regulation of angiogenesis	4.41664	Biological Process	3
response to endoplasmic reticulum stress	4.41664	Biological Process	3
atrioventricular canal development	4.41664	Biological Process	3
cellular response to ionizing radiation	4.41664	Biological Process	3
ossification	4.41664	Biological Process	3
transepithelial L-ascorbic acid transport	4.41664	Biological Process	3
proteolysis involved in cellular protein catabolic process	4.41664	Biological Process	3
entrainment of circadian clock	4.41664	Biological Process	3
regulation of translation	4.41664	Biological Process	3
lymph vessel development	4.41664	Biological Process	3
protein autophosphorylation	4.41664	Biological Process	3
head development	4.41664	Biological Process	3
heart contraction	4.41664	Biological Process	3
methylation	4.41664	Biological Process	3
DNA recombination	4.41664	Biological Process	3
compound eye photoreceptor development	4.41664	Biological Process	3
regulation of hyaluronan biosynthetic process	4.41664	Biological Process	3
endocardium development	4.41664	Biological Process	3
protein folding	4.41664	Biological Process	3
negative regulation of protein kinase activity	4.41664	Biological Process	3
ubiquitin-dependent protein catabolic process	4.41664	Biological Process	3
somite development	4.41664	Biological Process	3
cell-cell signaling	4.41664	Biological Process	3
sprouting angiogenesis	4.41664	Biological Process	3
G protein-coupled acetylcholine receptor signaling pathway	4.41664	Biological Process	3
negative regulation of cell population proliferation	4.41664	Biological Process	3
sphingolipid metabolic process	4.41664	Biological Process	3
pectoral fin development	4.41664	Biological Process	3
peptide metabolic process	4.41664	Biological Process	3
midbrain development	4.41664	Biological Process	3
photoreceptor cell maintenance	4.41664	Biological Process	3
regulation of lipid metabolic process	4.41664	Biological Process	3
endoplasmic reticulum unfolded protein response	4.41664	Biological Process	3
cilium assembly	4.41664	Biological Process	3
DNA integration	4.41664	Biological Process	3
dorsal aorta development	4.41664	Biological Process	3
photoreceptor cell development	4.41664	Biological Process	3
axon extension	4.41664	Biological Process	3
vitamin transmembrane transport	4.41664	Biological Process	3
adenosine metabolic process	4.41664	Biological Process	3
positive regulation of gluconeogenesis	4.41664	Biological Process	3
negative regulation of cell migration	4.41664	Biological Process	3
face morphogenesis	4.41664	Biological Process	3
melanosome transport	4.41664	Biological Process	3
posterior lateral line neuromast primordium migration	4.41664	Biological Process	3
receptor signaling pathway via JAK-STAT	4.41664	Biological Process	3
retinal ganglion cell axon guidance	4.41664	Biological Process	3
positive regulation of TOR signaling	4.41664	Biological Process	3
fatty acid beta-oxidation	4.41664	Biological Process	3
receptor localization to synapse	4.41664	Biological Process	3
positive regulation of cell differentiation	2.94442	Biological Process	2
regulation of autophagy	2.94442	Biological Process	2
circadian regulation of gene expression	2.94442	Biological Process	2
regulation of heart rate	2.94442	Biological Process	2
lymphocyte proliferation	2.94442	Biological Process	2
establishment of mitotic spindle orientation	2.94442	Biological Process	2
somatic motor neuron differentiation	2.94442	Biological Process	2
chaperone-mediated protein folding	2.94442	Biological Process	2
negative regulation of peptidyl-serine dephosphorylation	2.94442	Biological Process	2
inositol phosphate dephosphorylation	2.94442	Biological Process	2
gamma-aminobutyric acid signaling pathway	2.94442	Biological Process	2
cation transport	2.94442	Biological Process	2
left/right pattern formation	2.94442	Biological Process	2
response to methylmercury	2.94442	Biological Process	2
morphogenesis of a branching epithelium	2.94442	Biological Process	2
response to cytokine	2.94442	Biological Process	2
skeletal muscle cell differentiation	2.94442	Biological Process	2
glycosaminoglycan biosynthetic process	2.94442	Biological Process	2
intrinsic apoptotic signaling pathway by p53 class mediator	2.94442	Biological Process	2
response to radiation	2.94442	Biological Process	2
Notch signaling pathway	2.94442	Biological Process	2
nuclear migration	2.94442	Biological Process	2
definitive hemopoiesis	2.94442	Biological Process	2
macropinocytosis	2.94442	Biological Process	2
cell fate specification	2.94442	Biological Process	2
post-embryonic eye morphogenesis	2.94442	Biological Process	2
response to cAMP	2.94442	Biological Process	2
cell migration in hindbrain	2.94442	Biological Process	2
cholesterol metabolic process	2.94442	Biological Process	2
cardiac cell fate specification	2.94442	Biological Process	2
positive regulation of protein phosphorylation	2.94442	Biological Process	2
response to cadmium ion	2.94442	Biological Process	2
autophagosome maturation	2.94442	Biological Process	2
biosynthetic process	2.94442	Biological Process	2
chromatin remodeling	2.94442	Biological Process	2
primitive hemopoiesis	2.94442	Biological Process	2
adenosine receptor signaling pathway	2.94442	Biological Process	2
membrane fusion	2.94442	Biological Process	2
blood vessel morphogenesis	2.94442	Biological Process	2
regulation of Rho protein signal transduction	2.94442	Biological Process	2
locomotory behavior	2.94442	Biological Process	2
protein targeting to lysosome	2.94442	Biological Process	2
transcription by RNA polymerase II	2.94442	Biological Process	2
carbohydrate biosynthetic process	2.94442	Biological Process	2
regulation of insulin-like growth factor receptor signaling pathway	2.94442	Biological Process	2
protein K48-linked ubiquitination	2.94442	Biological Process	2
positive regulation of phosphorylation of RNA polymerase II C-terminal domain	2.94442	Biological Process	2
epidermal growth factor receptor signaling pathway	2.94442	Biological Process	2
protein sumoylation	2.94442	Biological Process	2
signal transduction in response to DNA damage	2.94442	Biological Process	2
protein targeting	2.94442	Biological Process	2
regulation of cytoplasmic translation	2.94442	Biological Process	2
bone mineralization	2.94442	Biological Process	2
extracellular matrix organization	2.94442	Biological Process	2
regulation of cell death	2.94442	Biological Process	2
fatty acid metabolic process	2.94442	Biological Process	2
regulation of cell differentiation	2.94442	Biological Process	2
central nervous system development	2.94442	Biological Process	2
response to unfolded protein	2.94442	Biological Process	2
cellular response to vascular endothelial growth factor stimulus	2.94442	Biological Process	2
post-anal tail morphogenesis	2.94442	Biological Process	2
regulation of cilium beat frequency involved in ciliary motility	2.94442	Biological Process	2
MAPK cascade	2.94442	Biological Process	2
neutrophil differentiation	2.94442	Biological Process	2
retinal rod cell differentiation	2.94442	Biological Process	2
cell communication	2.94442	Biological Process	2
convergent extension involved in gastrulation	2.94442	Biological Process	2
positive regulation of MAPK cascade	2.94442	Biological Process	2
positive regulation of reactive oxygen species metabolic process	2.94442	Biological Process	2
regulation of gene expression	2.94442	Biological Process	2
positive regulation of actin filament polymerization	2.94442	Biological Process	2
regulation of membrane repolarization	2.94442	Biological Process	2
regulation of retrograde vesicle-mediated transport, Golgi to ER	2.94442	Biological Process	2
positive regulation of cyclin-dependent protein serine/threonine kinase activity	2.94442	Biological Process	2
prostaglandin metabolic process	2.94442	Biological Process	2
embryonic pattern specification	2.94442	Biological Process	2
embryonic heart tube development	2.94442	Biological Process	2
vacuolar transport	2.94442	Biological Process	2
regulation of extracellular matrix constituent secretion	2.94442	Biological Process	2
glomerular filtration	2.94442	Biological Process	2
cerebellar Purkinje cell layer development	2.94442	Biological Process	2
mRNA localization resulting in posttranscriptional regulation of gene expression	2.94442	Biological Process	2
negative regulation of myoblast differentiation	2.94442	Biological Process	2
chloride transport	2.94442	Biological Process	2
otic vesicle formation	2.94442	Biological Process	2
ribosomal small subunit assembly	2.94442	Biological Process	2
proteoglycan biosynthetic process	2.94442	Biological Process	2
endothelial cell development	2.94442	Biological Process	2
mesodermal cell migration	2.94442	Biological Process	2
cerebral cortex development	2.94442	Biological Process	2
determination of heart left/right asymmetry	2.94442	Biological Process	2
receptor internalization	2.94442	Biological Process	2
vascular endothelial growth factor receptor signaling pathway	2.94442	Biological Process	2
negative regulation of BMP signaling pathway	2.94442	Biological Process	2
positive regulation of cell motility	2.94442	Biological Process	2
positive regulation of cell population proliferation	2.94442	Biological Process	2
vasculature development	2.94442	Biological Process	2
odontogenesis	2.94442	Biological Process	2
anatomical structure formation involved in morphogenesis	2.94442	Biological Process	2
smooth muscle contraction	2.94442	Biological Process	2
epithelial to mesenchymal transition	2.94442	Biological Process	2
mitotic G1 DNA damage checkpoint	2.94442	Biological Process	2
positive regulation of protein catabolic process	2.94442	Biological Process	2
regulation of release of sequestered calcium ion into cytosol by sarcoplasmic reticulum	2.94442	Biological Process	2
negative regulation of photoreceptor cell differentiation	2.94442	Biological Process	2
defense response to virus	2.94442	Biological Process	2
clathrin coat assembly	2.94442	Biological Process	2
primitive erythrocyte differentiation	2.94442	Biological Process	2
chromosome segregation	2.94442	Biological Process	2
regulation of mitotic cell cycle	2.94442	Biological Process	2
cell development	2.94442	Biological Process	2
sarcomerogenesis	2.94442	Biological Process	2
protein polyglutamylation	2.94442	Biological Process	2
negative regulation of angiogenesis	2.94442	Biological Process	2
cellular response to DNA damage stimulus	2.94442	Biological Process	2
SMAD protein signal transduction	2.94442	Biological Process	2
positive regulation of feeding behavior	2.94442	Biological Process	2
hippocampus development	2.94442	Biological Process	2
regulation of Wnt signaling pathway	2.94442	Biological Process	2
artery morphogenesis	2.94442	Biological Process	2
I-kappaB kinase/NF-kappaB signaling	2.94442	Biological Process	2
cholesterol homeostasis	2.94442	Biological Process	2
renal vesicle induction	2.94442	Biological Process	2
planar cell polarity pathway involved in neural tube closure	2.94442	Biological Process	2
fatty acid biosynthetic process	2.94442	Biological Process	2
cytoskeleton-dependent intracellular transport	2.94442	Biological Process	2
embryonic neurocranium morphogenesis	2.94442	Biological Process	2
response to oxidative stress	2.94442	Biological Process	2
prostaglandin biosynthetic process	2.94442	Biological Process	2
embryonic heart tube left/right pattern formation	2.94442	Biological Process	2
actin filament organization	2.94442	Biological Process	2
positive regulation of branching involved in ureteric bud morphogenesis	2.94442	Biological Process	2
diencephalon development	2.94442	Biological Process	2
phosphatidylinositol biosynthetic process	2.94442	Biological Process	2
embryonic hemopoiesis	2.94442	Biological Process	2
phospholipid transport	2.94442	Biological Process	2
digestive tract morphogenesis	2.94442	Biological Process	2
regulation of potassium ion transmembrane transporter activity	2.94442	Biological Process	2
SCF-dependent proteasomal ubiquitin-dependent protein catabolic process	2.94442	Biological Process	2
vasculogenesis	2.94442	Biological Process	2
regulation of heart contraction	2.94442	Biological Process	2
ribosomal large subunit export from nucleus	2.94442	Biological Process	2
angioblast cell migration	2.94442	Biological Process	2
inositol metabolic process	2.94442	Biological Process	2
response to drug	2.94442	Biological Process	2
negative regulation of transforming growth factor beta receptor signaling pathway	2.94442	Biological Process	2
macrophage differentiation	2.94442	Biological Process	2
regulation of ER to Golgi vesicle-mediated transport	2.94442	Biological Process	2
adenylate cyclase-inhibiting G protein-coupled receptor signaling pathway	2.94442	Biological Process	2
metal ion transport	2.94442	Biological Process	2
embryonic retina morphogenesis in camera-type eye	2.94442	Biological Process	2
response to hormone	2.94442	Biological Process	2
glomerular visceral epithelial cell development	2.94442	Biological Process	2
iron-sulfur cluster assembly	2.94442	Biological Process	2
cellular response to mechanical stimulus	2.94442	Biological Process	2
chemotaxis	2.94442	Biological Process	2
neuron differentiation	2.94442	Biological Process	2
actomyosin structure organization	2.94442	Biological Process	2
regulation of cell cycle	2.94442	Biological Process	2
Golgi organization	2.94442	Biological Process	2
metanephric nephron tubule formation	2.94442	Biological Process	2
melanocyte differentiation	2.94442	Biological Process	2
muscle contraction	1.47221	Biological Process	1
positive regulation of catalytic activity	1.47221	Biological Process	1
protein targeting to membrane	1.47221	Biological Process	1
negative regulation of cell growth	1.47221	Biological Process	1
positive regulation of ERK1 and ERK2 cascade	1.47221	Biological Process	1
regulation of cell morphogenesis	1.47221	Biological Process	1
hematopoietic stem cell differentiation	1.47221	Biological Process	1
microtubule nucleation	1.47221	Biological Process	1
optic vesicle morphogenesis	1.47221	Biological Process	1
melanin metabolic process	1.47221	Biological Process	1
proteasomal protein catabolic process	1.47221	Biological Process	1
negative regulation of amyloid precursor protein biosynthetic process	1.47221	Biological Process	1
endoderm formation	1.47221	Biological Process	1
lymphangiogenesis	1.47221	Biological Process	1
eye morphogenesis	1.47221	Biological Process	1
inhibition of cysteine-type endopeptidase activity involved in apoptotic process	1.47221	Biological Process	1
regulation of dendrite morphogenesis	1.47221	Biological Process	1
wound healing	1.47221	Biological Process	1
Roundabout signaling pathway	1.47221	Biological Process	1
endosome to lysosome transport	1.47221	Biological Process	1
regulation of cytokinesis	1.47221	Biological Process	1
astrocyte fate commitment	1.47221	Biological Process	1
neuroblast proliferation	1.47221	Biological Process	1
RNA splicing, via transesterification reactions	1.47221	Biological Process	1
cellular response to drug	1.47221	Biological Process	1
protein polyubiquitination	1.47221	Biological Process	1
negative regulation of biosynthetic process	1.47221	Biological Process	1
muscle cell fate specification	1.47221	Biological Process	1
endothelial tube morphogenesis	1.47221	Biological Process	1
positive regulation of epithelial cell proliferation	1.47221	Biological Process	1
adrenergic receptor signaling pathway	1.47221	Biological Process	1
cell maturation	1.47221	Biological Process	1
cellular response to epidermal growth factor stimulus	1.47221	Biological Process	1
positive regulation of interferon-beta biosynthetic process	1.47221	Biological Process	1
cerebellum vasculature development	1.47221	Biological Process	1
dopamine receptor signaling pathway	1.47221	Biological Process	1
protein catabolic process in the vacuole	1.47221	Biological Process	1
regulation of centrosome duplication	1.47221	Biological Process	1
response to herbicide	1.47221	Biological Process	1
nucleosome assembly	1.47221	Biological Process	1
circadian rhythm	1.47221	Biological Process	1
RNA processing	1.47221	Biological Process	1
negative regulation of insulin receptor signaling pathway	1.47221	Biological Process	1
negative regulation of ERK1 and ERK2 cascade	1.47221	Biological Process	1
glomerulus development	1.47221	Biological Process	1
peripheral nervous system development	1.47221	Biological Process	1
neuromuscular process controlling balance	1.47221	Biological Process	1
toll-like receptor signaling pathway	1.47221	Biological Process	1
peristalsis	1.47221	Biological Process	1
camera-type eye morphogenesis	1.47221	Biological Process	1
histone H3-K27 demethylation	1.47221	Biological Process	1
SRP-dependent cotranslational protein targeting to membrane	1.47221	Biological Process	1
antigen processing and presentation of endogenous peptide antigen via MHC class I	1.47221	Biological Process	1
ribosomal large subunit assembly	1.47221	Biological Process	1
retrograde vesicle-mediated transport, Golgi to endoplasmic reticulum	1.47221	Biological Process	1
regulation of JNK cascade	1.47221	Biological Process	1
steroid metabolic process	1.47221	Biological Process	1
N-glycan fucosylation	1.47221	Biological Process	1
septum digestion after cytokinesis	1.47221	Biological Process	1
photoreceptor cell outer segment organization	1.47221	Biological Process	1
positive regulation of epithelial cell migration	1.47221	Biological Process	1
receptor-mediated endocytosis	1.47221	Biological Process	1
cellular response to hydrogen peroxide	1.47221	Biological Process	1
fin morphogenesis	1.47221	Biological Process	1
protein catabolic process	1.47221	Biological Process	1
lipoprotein metabolic process	1.47221	Biological Process	1
response to estradiol	1.47221	Biological Process	1
lipid droplet organization	1.47221	Biological Process	1
Mo-molybdopterin cofactor biosynthetic process	1.47221	Biological Process	1
regulation of neurotransmitter secretion	1.47221	Biological Process	1
cytoskeletal anchoring at plasma membrane	1.47221	Biological Process	1
positive regulation of protein autophosphorylation	1.47221	Biological Process	1
cellular response to fatty acid	1.47221	Biological Process	1
negative regulation of epithelial cell proliferation	1.47221	Biological Process	1
T cell activation	1.47221	Biological Process	1
regulation of cell migration	1.47221	Biological Process	1
negative regulation of osteoclast differentiation	1.47221	Biological Process	1
establishment of epithelial cell apical/basal polarity	1.47221	Biological Process	1
growth	1.47221	Biological Process	1
positive regulation of inositol phosphate biosynthetic process	1.47221	Biological Process	1
response to organic substance	1.47221	Biological Process	1
somatic stem cell population maintenance	1.47221	Biological Process	1
positive regulation of mesenchymal cell proliferation	1.47221	Biological Process	1
protein homotrimerization	1.47221	Biological Process	1
cell-cell junction maintenance	1.47221	Biological Process	1
negative regulation of programmed cell death	1.47221	Biological Process	1
cotranslational protein targeting to membrane	1.47221	Biological Process	1
glutathione metabolic process	1.47221	Biological Process	1
GPI anchor biosynthetic process	1.47221	Biological Process	1
aorta development	1.47221	Biological Process	1
positive regulation of interleukin-8 biosynthetic process	1.47221	Biological Process	1
positive regulation of male gonad development	1.47221	Biological Process	1
enteric nervous system development	1.47221	Biological Process	1
positive regulation of neuron projection development	1.47221	Biological Process	1
regulation of T cell activation	1.47221	Biological Process	1
selenocysteinyl-tRNA(Sec) biosynthetic process	1.47221	Biological Process	1
ERBB2 signaling pathway	1.47221	Biological Process	1
developmental growth	1.47221	Biological Process	1
peptidyl-L-cysteine S-palmitoylation	1.47221	Biological Process	1
stress fiber assembly	1.47221	Biological Process	1
Sertoli cell development	1.47221	Biological Process	1
cell adhesion mediated by integrin	1.47221	Biological Process	1
roof of mouth development	1.47221	Biological Process	1
histone acetylation	1.47221	Biological Process	1
negative regulation of intrinsic apoptotic signaling pathway by p53 class mediator	1.47221	Biological Process	1
amyloid-beta formation	1.47221	Biological Process	1
regulation of proteolysis	1.47221	Biological Process	1
early endosome to Golgi transport	1.47221	Biological Process	1
activation of NF-kappaB-inducing kinase activity	1.47221	Biological Process	1
plasma membrane organization	1.47221	Biological Process	1
hemoglobin biosynthetic process	1.47221	Biological Process	1
chromosome organization	1.47221	Biological Process	1
copper ion homeostasis	1.47221	Biological Process	1
arginine catabolic process	1.47221	Biological Process	1
negative regulation of gene expression	1.47221	Biological Process	1
negative regulation of cell cycle	1.47221	Biological Process	1
regulation of receptor recycling	1.47221	Biological Process	1
caudal fin morphogenesis	1.47221	Biological Process	1
endoplasmic reticulum organization	1.47221	Biological Process	1
regulation of axon extension	1.47221	Biological Process	1
cartilage morphogenesis	1.47221	Biological Process	1
aromatic amino acid family metabolic process	1.47221	Biological Process	1
gene silencing	1.47221	Biological Process	1
actin filament-based movement	1.47221	Biological Process	1
sclerotome development	1.47221	Biological Process	1
renal system process	1.47221	Biological Process	1
adenylate cyclase-modulating G protein-coupled receptor signaling pathway	1.47221	Biological Process	1
protein maturation by copper ion transfer	1.47221	Biological Process	1
lateral inhibition	1.47221	Biological Process	1
determination of left/right asymmetry in lateral mesoderm	1.47221	Biological Process	1
ureter morphogenesis	1.47221	Biological Process	1
regulation of ARF protein signal transduction	1.47221	Biological Process	1
optic nerve formation	1.47221	Biological Process	1
N-glycan processing	1.47221	Biological Process	1
centrosome localization	1.47221	Biological Process	1
regulation of cardiac muscle contraction	1.47221	Biological Process	1
carbohydrate transmembrane transport	1.47221	Biological Process	1
negative regulation of immune system process	1.47221	Biological Process	1
intestinal cholesterol absorption	1.47221	Biological Process	1
cell projection organization	1.47221	Biological Process	1
forebrain development	1.47221	Biological Process	1
negative regulation of protein localization to cell surface	1.47221	Biological Process	1
exocrine pancreas development	1.47221	Biological Process	1
spliceosomal complex assembly	1.47221	Biological Process	1
positive chemotaxis	1.47221	Biological Process	1
muscle attachment	1.47221	Biological Process	1
negative regulation of Wnt signaling pathway, calcium modulating pathway	1.47221	Biological Process	1
plasma membrane repair	1.47221	Biological Process	1
positive regulation of toll-like receptor 4 signaling pathway	1.47221	Biological Process	1
regulation of neuron projection development	1.47221	Biological Process	1
ventral spinal cord interneuron differentiation	1.47221	Biological Process	1
aging	1.47221	Biological Process	1
negative regulation of epinephrine secretion	1.47221	Biological Process	1
cytoskeleton organization	1.47221	Biological Process	1
tissue homeostasis	1.47221	Biological Process	1
cellular protein localization	1.47221	Biological Process	1
protein localization	1.47221	Biological Process	1
cardiac myofibril assembly	1.47221	Biological Process	1
regulation of protein phosphorylation	1.47221	Biological Process	1
positive regulation of interferon-alpha biosynthetic process	1.47221	Biological Process	1
tetrahydrofolylpolyglutamate biosynthetic process	1.47221	Biological Process	1
cytokinesis	1.47221	Biological Process	1
neuron development	1.47221	Biological Process	1
dorsal motor nucleus of vagus nerve development	1.47221	Biological Process	1
T-tubule organization	1.47221	Biological Process	1
positive regulation of cyclic-nucleotide phosphodiesterase activity	1.47221	Biological Process	1
positive regulation of amyloid-beta formation	1.47221	Biological Process	1
wound healing, spreading of cells	1.47221	Biological Process	1
heart valve morphogenesis	1.47221	Biological Process	1
DNA repair	1.47221	Biological Process	1
protein secretion	1.47221	Biological Process	1
adherens junction assembly	1.47221	Biological Process	1
determination of liver left/right asymmetry	1.47221	Biological Process	1
adherens junction maintenance	1.47221	Biological Process	1
response to estrogen	1.47221	Biological Process	1
positive regulation of protein ubiquitination	1.47221	Biological Process	1
Sertoli cell differentiation	1.47221	Biological Process	1
notochord morphogenesis	1.47221	Biological Process	1
anatomical structure morphogenesis	1.47221	Biological Process	1
protein localization to plasma membrane	1.47221	Biological Process	1
negative regulation of Ras protein signal transduction	1.47221	Biological Process	1
Ras protein signal transduction	1.47221	Biological Process	1
hair follicle development	1.47221	Biological Process	1
cellular response to growth factor stimulus	1.47221	Biological Process	1
positive regulation of triglyceride biosynthetic process	1.47221	Biological Process	1
regulation of eye photoreceptor cell development	1.47221	Biological Process	1
mitotic metaphase plate congression	1.47221	Biological Process	1
neuron apoptotic process	1.47221	Biological Process	1
regulation of bone mineralization	1.47221	Biological Process	1
defense response to other organism	1.47221	Biological Process	1
protein kinase B signaling	1.47221	Biological Process	1
digestive tract mesoderm development	1.47221	Biological Process	1
positive regulation of gliogenesis	1.47221	Biological Process	1
hematopoietic progenitor cell differentiation	1.47221	Biological Process	1
negative regulation of fibroblast growth factor receptor signaling pathway	1.47221	Biological Process	1
neural tube patterning	1.47221	Biological Process	1
positive regulation of kidney development	1.47221	Biological Process	1
endoplasmic reticulum to Golgi vesicle-mediated transport	1.47221	Biological Process	1
detection of calcium ion	1.47221	Biological Process	1
blood circulation	1.47221	Biological Process	1
peptide cross-linking	1.47221	Biological Process	1
male gonad development	1.47221	Biological Process	1
mitochondrial pyruvate transmembrane transport	1.47221	Biological Process	1
negative regulation of endothelial cell migration	1.47221	Biological Process	1
phagolysosome assembly involved in apoptotic cell clearance	1.47221	Biological Process	1
ATP hydrolysis coupled proton transport	1.47221	Biological Process	1
anterior/posterior pattern specification	1.47221	Biological Process	1
mediolateral intercalation	1.47221	Biological Process	1
regulation of mitotic spindle assembly	1.47221	Biological Process	1
positive regulation of phosphatidylinositol 3-kinase signaling	1.47221	Biological Process	1
rhythmic process	1.47221	Biological Process	1
protein tetramerization	1.47221	Biological Process	1
third ventricle development	1.47221	Biological Process	1
cholesterol import	1.47221	Biological Process	1
epiboly involved in gastrulation with mouth forming second	1.47221	Biological Process	1
non-canonical Wnt signaling pathway	1.47221	Biological Process	1
adipose tissue development	1.47221	Biological Process	1
cation transmembrane transport	1.47221	Biological Process	1
establishment of protein localization	1.47221	Biological Process	1
positive regulation of Notch signaling pathway	1.47221	Biological Process	1
ventricular system development	1.47221	Biological Process	1
Notch receptor processing	1.47221	Biological Process	1
cellular response to calcium ion	1.47221	Biological Process	1
regulation of epithelial cell proliferation	1.47221	Biological Process	1
positive regulation of canonical Wnt signaling pathway	1.47221	Biological Process	1
mitotic spindle assembly	1.47221	Biological Process	1
adenohypophysis development	1.47221	Biological Process	1
protein localization to cytoskeleton	1.47221	Biological Process	1
substrate-dependent cell migration, cell extension	1.47221	Biological Process	1
folic acid-containing compound biosynthetic process	1.47221	Biological Process	1
intermediate filament cytoskeleton organization	1.47221	Biological Process	1
lysosome organization	1.47221	Biological Process	1
cartilage condensation	1.47221	Biological Process	1
platelet-derived growth factor receptor signaling pathway	1.47221	Biological Process	1
protein autoubiquitination	1.47221	Biological Process	1
response to xenobiotic stimulus	1.47221	Biological Process	1
regulation of cellular response to hypoxia	1.47221	Biological Process	1
regulation of growth	1.47221	Biological Process	1
morphogenesis of a polarized epithelium	1.47221	Biological Process	1
nuclear-transcribed mRNA catabolic process	1.47221	Biological Process	1
exit from mitosis	1.47221	Biological Process	1
fibroblast growth factor receptor signaling pathway	1.47221	Biological Process	1
positive regulation of proteasomal ubiquitin-dependent protein catabolic process	1.47221	Biological Process	1
artery development	1.47221	Biological Process	1
bone mineralization involved in bone maturation	1.47221	Biological Process	1
positive regulation of mesenchymal stem cell differentiation	1.47221	Biological Process	1
cell-cell junction organization	1.47221	Biological Process	1
hindbrain development	1.47221	Biological Process	1
spliceosomal snRNP assembly	1.47221	Biological Process	1
positive regulation of epithelial cell differentiation	1.47221	Biological Process	1
bone resorption	1.47221	Biological Process	1
regulation of actin cytoskeleton organization	1.47221	Biological Process	1
ERK1 and ERK2 cascade	1.47221	Biological Process	1
positive regulation of interferon-gamma biosynthetic process	1.47221	Biological Process	1
endocrine system development	1.47221	Biological Process	1
phospholipid dephosphorylation	1.47221	Biological Process	1
response to activity	1.47221	Biological Process	1
response to metal ion	1.47221	Biological Process	1
regulation of cytokine secretion	1.47221	Biological Process	1
phosphatidylglycerol biosynthetic process	1.47221	Biological Process	1
gastrulation	1.47221	Biological Process	1
male germ-line sex determination	1.47221	Biological Process	1
axon extension involved in axon guidance	1.47221	Biological Process	1
chondrocyte differentiation involved in endochondral bone morphogenesis	1.47221	Biological Process	1
response to toxic substance	1.47221	Biological Process	1
branched-chain amino acid metabolic process	1.47221	Biological Process	1
Golgi to plasma membrane protein transport	1.47221	Biological Process	1
positive regulation of ossification	1.47221	Biological Process	1
response to copper ion	1.47221	Biological Process	1
receptor clustering	1.47221	Biological Process	1
regulation of cell size	1.47221	Biological Process	1
regulation of nucleocytoplasmic transport	1.47221	Biological Process	1
otic vesicle development	1.47221	Biological Process	1
anoikis	1.47221	Biological Process	1
myoblast fusion	1.47221	Biological Process	1
positive regulation of defense response to virus by host	1.47221	Biological Process	1
apoptotic process	1.47221	Biological Process	1
positive regulation of ryanodine-sensitive calcium-release channel activity	1.47221	Biological Process	1
protein N-linked glycosylation	1.47221	Biological Process	1
Rho protein signal transduction	1.47221	Biological Process	1
regulation of DNA-binding transcription factor activity	1.47221	Biological Process	1
membrane protein ectodomain proteolysis	1.47221	Biological Process	1
endocrine pancreas development	1.47221	Biological Process	1
generation of neurons	1.47221	Biological Process	1
olfactory placode formation	1.47221	Biological Process	1
negative regulation of signal transduction	1.47221	Biological Process	1
planar cell polarity pathway involved in gastrula mediolateral intercalation	1.47221	Biological Process	1
oligodendrocyte differentiation	1.47221	Biological Process	1
carbon catabolite repression of transcription by glucose	1.47221	Biological Process	1
pituitary gland development	1.47221	Biological Process	1
ventricular cardiac muscle cell development	1.47221	Biological Process	1
neural tube formation	1.47221	Biological Process	1
establishment of chromosome localization	1.47221	Biological Process	1
neural crest cell development	1.47221	Biological Process	1
one-carbon metabolic process	1.47221	Biological Process	1
protein O-linked mannosylation	1.47221	Biological Process	1
regulation of cellular response to growth factor stimulus	1.47221	Biological Process	1
heart jogging	1.47221	Biological Process	1
MyD88-dependent toll-like receptor signaling pathway	1.47221	Biological Process	1
response to iron ion	1.47221	Biological Process	1
regulation of ion transmembrane transport	1.47221	Biological Process	1
positive regulation of chondrocyte differentiation	1.47221	Biological Process	1
vesicle transport along microtubule	1.47221	Biological Process	1
heart rudiment formation	1.47221	Biological Process	1
negative regulation of ossification	1.47221	Biological Process	1
translational initiation	1.47221	Biological Process	1
central nervous system neuron differentiation	1.47221	Biological Process	1
negative regulation of T cell activation	1.47221	Biological Process	1
negative regulation of endodermal cell differentiation	1.47221	Biological Process	1
cardiac septum development	1.47221	Biological Process	1
negative regulation of sodium ion transmembrane transport	1.47221	Biological Process	1
divalent inorganic cation homeostasis	1.47221	Biological Process	1
RNA metabolic process	1.47221	Biological Process	1
cellular copper ion homeostasis	1.47221	Biological Process	1
regulation of hormone levels	1.47221	Biological Process	1
3'-UTR-mediated mRNA destabilization	1.47221	Biological Process	1
response to glucagon	1.47221	Biological Process	1
otic placode formation	1.47221	Biological Process	1
embryonic digestive tract morphogenesis	1.47221	Biological Process	1
coronary vasculature development	1.47221	Biological Process	1
collagen fibril organization	1.47221	Biological Process	1
cochlea morphogenesis	1.47221	Biological Process	1
chloride transmembrane transport	1.47221	Biological Process	1
cellular response to xenobiotic stimulus	1.47221	Biological Process	1
peptidyl-glutamic acid carboxylation	1.47221	Biological Process	1
transcription elongation from RNA polymerase II promoter	1.47221	Biological Process	1
post-embryonic foregut morphogenesis	1.47221	Biological Process	1
animal organ morphogenesis	1.47221	Biological Process	1
histone H3-K9 demethylation	1.47221	Biological Process	1
regulation of protein kinase activity	1.47221	Biological Process	1
low-density lipoprotein particle clearance	1.47221	Biological Process	1
spinal cord development	1.47221	Biological Process	1
regulation of cell cycle process	1.47221	Biological Process	1
floor plate formation	1.47221	Biological Process	1
striated muscle cell development	1.47221	Biological Process	1
cellular response to starvation	1.47221	Biological Process	1
microvillus assembly	1.47221	Biological Process	1
trigeminal nerve development	1.47221	Biological Process	1
negative regulation of axon regeneration	1.47221	Biological Process	1
determination of pancreatic left/right asymmetry	1.47221	Biological Process	1
lipoprotein catabolic process	1.47221	Biological Process	1
somatic muscle development	1.47221	Biological Process	1
protein desumoylation	1.47221	Biological Process	1
regulation of proteasomal ubiquitin-dependent protein catabolic process	1.47221	Biological Process	1
positive regulation of myoblast differentiation	1.47221	Biological Process	1
posttranscriptional regulation of gene expression	1.47221	Biological Process	1
cellular amino acid metabolic process	1.47221	Biological Process	1
auditory receptor cell fate specification	1.47221	Biological Process	1
immune response	1.47221	Biological Process	1
establishment or maintenance of polarity of embryonic epithelium	1.47221	Biological Process	1
peptidyl-tyrosine autophosphorylation	1.47221	Biological Process	1
bile acid and bile salt transport	1.47221	Biological Process	1
heme oxidation	1.47221	Biological Process	1
defense response	1.47221	Biological Process	1
mRNA processing	1.47221	Biological Process	1
intracellular receptor signaling pathway	1.47221	Biological Process	1
entrainment of circadian clock by photoperiod	1.47221	Biological Process	1
dolichol metabolic process	1.47221	Biological Process	1
negative regulation of protein ubiquitination	1.47221	Biological Process	1
negative regulation of catalytic activity	1.47221	Biological Process	1
negative regulation of cell death	1.47221	Biological Process	1
Rap protein signal transduction	1.47221	Biological Process	1
actin cytoskeleton organization	1.47221	Biological Process	1
mitotic chromosome condensation	1.47221	Biological Process	1
positive regulation of phosphoprotein phosphatase activity	1.47221	Biological Process	1
lateral line system development	1.47221	Biological Process	1
negative regulation of mitotic cell cycle	1.47221	Biological Process	1
lipid transport	1.47221	Biological Process	1
steroid hormone mediated signaling pathway	1.47221	Biological Process	1
negative regulation of translational initiation	1.47221	Biological Process	1
lateral ventricle development	1.47221	Biological Process	1
cholesterol transport	1.47221	Biological Process	1
regulation of phosphatidylcholine catabolic process	1.47221	Biological Process	1
regulation of blood pressure	1.47221	Biological Process	1
actin polymerization or depolymerization	1.47221	Biological Process	1
skeletal muscle satellite cell migration	1.47221	Biological Process	1
neural tube development	1.47221	Biological Process	1
phosphate ion homeostasis	1.47221	Biological Process	1
mRNA cleavage involved in gene silencing by miRNA	1.47221	Biological Process	1
ion transmembrane transport	1.47221	Biological Process	1
pronephros development	1.47221	Biological Process	1
positive regulation of osteoblast proliferation	1.47221	Biological Process	1
positive regulation of vascular endothelial growth factor signaling pathway	1.47221	Biological Process	1
phosphatidylinositol metabolic process	1.47221	Biological Process	1
adult heart development	1.47221	Biological Process	1
olfactory bulb development	1.47221	Biological Process	1
adherens junction organization	1.47221	Biological Process	1
toll-like receptor 8 signaling pathway	1.47221	Biological Process	1
fourth ventricle development	1.47221	Biological Process	1
T cell receptor signaling pathway	1.47221	Biological Process	1
positive regulation of toll-like receptor 3 signaling pathway	1.47221	Biological Process	1
germ cell migration	1.47221	Biological Process	1
regulation of Wnt signaling pathway, calcium modulating pathway	1.47221	Biological Process	1
purine nucleotide metabolic process	1.47221	Biological Process	1
phagocytosis	1.47221	Biological Process	1
phospholipid biosynthetic process	1.47221	Biological Process	1
nucleus organization	1.47221	Biological Process	1
epithelial cell proliferation involved in prostatic bud elongation	1.47221	Biological Process	1
positive regulation of endothelial cell migration	1.47221	Biological Process	1
phospholipid metabolic process	1.47221	Biological Process	1
osteoblast differentiation	1.47221	Biological Process	1
regulation of translational initiation	1.47221	Biological Process	1
lipid storage	1.47221	Biological Process	1
iron ion transport	1.47221	Biological Process	1
positive regulation of JNK cascade	1.47221	Biological Process	1
negative regulation of cellular protein catabolic process	1.47221	Biological Process	1
cellular iron ion homeostasis	1.47221	Biological Process	1
endoderm development	1.47221	Biological Process	1
mesodermal cell differentiation	1.47221	Biological Process	1
cranial nerve development	1.47221	Biological Process	1
apoptotic signaling pathway	1.47221	Biological Process	1
cellular protein modification process	1.47221	Biological Process	1
skeletal muscle tissue development	1.47221	Biological Process	1
cAMP-mediated signaling	1.47221	Biological Process	1
regulation of T cell proliferation	1.47221	Biological Process	1
vascular endothelial growth factor signaling pathway	1.47221	Biological Process	1
regulation of blood coagulation	1.47221	Biological Process	1
nuclear-transcribed mRNA catabolic process, nonsense-mediated decay	1.47221	Biological Process	1
heart valve development	1.47221	Biological Process	1
regulation of cell aging	1.47221	Biological Process	1
regulation of branching involved in salivary gland morphogenesis	1.47221	Biological Process	1
Golgi to endosome transport	1.47221	Biological Process	1
regulation of neurogenesis	1.47221	Biological Process	1
response to ATP	1.47221	Biological Process	1
tissue regeneration	1.47221	Biological Process	1
melanosome organization	1.47221	Biological Process	1
CDP-diacylglycerol biosynthetic process	1.47221	Biological Process	1
alternative mRNA splicing, via spliceosome	1.47221	Biological Process	1
molybdopterin cofactor biosynthetic process	1.47221	Biological Process	1
olfactory placode development	1.47221	Biological Process	1
cytoplasmic translation	1.47221	Biological Process	1
regulation of cell proliferation involved in tissue homeostasis	1.47221	Biological Process	1
desmosome assembly	1.47221	Biological Process	1
regulation of smoothened signaling pathway	1.47221	Biological Process	1
negative regulation of chondrocyte differentiation	1.47221	Biological Process	1
adenohypophysis morphogenesis	1.47221	Biological Process	1
negative regulation of neutrophil chemotaxis	1.47221	Biological Process	1
response to electrical stimulus	1.47221	Biological Process	1
skin development	1.47221	Biological Process	1
3'-UTR-mediated mRNA stabilization	1.47221	Biological Process	1
regulation of axonogenesis	1.47221	Biological Process	1
induction of positive chemotaxis	1.47221	Biological Process	1
cellular magnesium ion homeostasis	1.47221	Biological Process	1
positive regulation of inflammatory response	1.47221	Biological Process	1
pronephric nephron tubule epithelial cell differentiation	1.47221	Biological Process	1
endocardial cushion morphogenesis	1.47221	Biological Process	1
mitotic centrosome separation	1.47221	Biological Process	1
positive regulation of mRNA catabolic process	1.47221	Biological Process	1
negative regulation of membrane protein ectodomain proteolysis	1.47221	Biological Process	1
in utero embryonic development	1.47221	Biological Process	1
regulation of retinoic acid biosynthetic process	1.47221	Biological Process	1
tricarboxylic acid cycle	1.47221	Biological Process	1
chondrocyte hypertrophy	1.47221	Biological Process	1
mitotic cytokinesis	1.47221	Biological Process	1
nuclear export	1.47221	Biological Process	1
protein homotetramerization	1.47221	Biological Process	1
embryonic skeletal joint morphogenesis	1.47221	Biological Process	1
cellular response to heparin	1.47221	Biological Process	1
cellular response to organic cyclic compound	1.47221	Biological Process	1
muscle cell development	1.47221	Biological Process	1
aspartate catabolic process	1.47221	Biological Process	1
protein localization to lysosome	1.47221	Biological Process	1
mitotic sister chromatid cohesion	1.47221	Biological Process	1
negative regulation of biomineral tissue development	1.47221	Biological Process	1
trigeminal sensory nucleus development	1.47221	Biological Process	1
ameboidal-type cell migration	1.47221	Biological Process	1
gene silencing by RNA	1.47221	Biological Process	1
membrane	90.9091	Cellular Component	247
integral component of membrane	85.7563	Cellular Component	233
cytoplasm	65.1454	Cellular Component	177
nucleus	60.3607	Cellular Component	164
plasma membrane	19.5068	Cellular Component	53
nucleoplasm	16.5624	Cellular Component	45
extracellular exosome	15.4582	Cellular Component	42
cytosol	15.0902	Cellular Component	41
nuclear chromatin	13.2499	Cellular Component	36
intracellular	12.1457	Cellular Component	33
Golgi apparatus	10.6735	Cellular Component	29
transcription factor complex	9.93743	Cellular Component	27
integral component of plasma membrane	9.20132	Cellular Component	25
extracellular region	9.20132	Cellular Component	25
extracellular space	8.46522	Cellular Component	23
endoplasmic reticulum	8.09717	Cellular Component	22
protein-DNA complex	8.09717	Cellular Component	22
beta-catenin-TCF7L2 complex	8.09717	Cellular Component	22
endosome	7.36106	Cellular Component	20
cytoskeleton	7.36106	Cellular Component	20
microtubule	6.2569	Cellular Component	17
perinuclear region of cytoplasm	6.2569	Cellular Component	17
endoplasmic reticulum membrane	6.2569	Cellular Component	17
phagophore assembly site	5.52079	Cellular Component	15
Atg1/ULK1 kinase complex	5.15274	Cellular Component	14
transcriptional repressor complex	4.78469	Cellular Component	13
mitochondrion	4.78469	Cellular Component	13
lysosome	4.41664	Cellular Component	12
integral component of Golgi membrane	4.41664	Cellular Component	12
lysosomal membrane	4.41664	Cellular Component	12
npBAF complex	4.41664	Cellular Component	12
SWI/SNF complex	4.41664	Cellular Component	12
nBAF complex	4.41664	Cellular Component	12
focal adhesion	4.04858	Cellular Component	11
apical part of cell	4.04858	Cellular Component	11
early endosome	4.04858	Cellular Component	11
intracellular membrane-bounded organelle	4.04858	Cellular Component	11
nucleolus	3.68053	Cellular Component	10
kinesin complex	3.68053	Cellular Component	10
collagen trimer	3.68053	Cellular Component	10
microfibril	3.31248	Cellular Component	9
external side of plasma membrane	3.31248	Cellular Component	9
Golgi membrane	3.31248	Cellular Component	9
cell surface	3.31248	Cellular Component	9
activin receptor complex	3.31248	Cellular Component	9
mitochondrial outer membrane	2.94442	Cellular Component	8
phosphatidylinositol 3-kinase complex	2.94442	Cellular Component	8
extracellular matrix	2.94442	Cellular Component	8
cell junction	2.57637	Cellular Component	7
synapse	2.57637	Cellular Component	7
extrinsic component of membrane	2.57637	Cellular Component	7
mitochondrial envelope	2.57637	Cellular Component	7
nuclear envelope	2.57637	Cellular Component	7
Golgi-associated vesicle membrane	2.20832	Cellular Component	6
P-body	2.20832	Cellular Component	6
viral nucleocapsid	2.20832	Cellular Component	6
cerebellar mossy fiber	2.20832	Cellular Component	6
integral component of lumenal side of endoplasmic reticulum membrane	2.20832	Cellular Component	6
integral component of cytoplasmic side of endoplasmic reticulum membrane	2.20832	Cellular Component	6
endomembrane system	2.20832	Cellular Component	6
virion	2.20832	Cellular Component	6
postsynaptic membrane	2.20832	Cellular Component	6
cell-cell junction	2.20832	Cellular Component	6
basolateral plasma membrane	1.84026	Cellular Component	5
centrosome	1.84026	Cellular Component	5
rough endoplasmic reticulum	1.84026	Cellular Component	5
histone deacetylase complex	1.84026	Cellular Component	5
chromosome	1.84026	Cellular Component	5
clathrin adaptor complex	1.84026	Cellular Component	5
late endosome membrane	1.84026	Cellular Component	5
neuronal cell body	1.47221	Cellular Component	4
microtubule organizing center	1.47221	Cellular Component	4
spindle	1.47221	Cellular Component	4
NuRD complex	1.47221	Cellular Component	4
protein phosphatase 4 complex	1.47221	Cellular Component	4
ubiquitin ligase complex	1.47221	Cellular Component	4
extrinsic component of Golgi membrane	1.47221	Cellular Component	4
cytosolic large ribosomal subunit	1.47221	Cellular Component	4
CHOP-C/EBP complex	1.47221	Cellular Component	4
dendritic spine	1.47221	Cellular Component	4
apical plasma membrane	1.47221	Cellular Component	4
myosin complex	1.47221	Cellular Component	4
cell cortex	1.47221	Cellular Component	4
trans-Golgi network	1.47221	Cellular Component	4
photoreceptor outer segment	1.10416	Cellular Component	3
Z disc	1.10416	Cellular Component	3
PeBoW complex	1.10416	Cellular Component	3
melanosome	1.10416	Cellular Component	3
late endosome	1.10416	Cellular Component	3
RNA polymerase III complex	1.10416	Cellular Component	3
contractile fiber	1.10416	Cellular Component	3
phagocytic vesicle membrane	1.10416	Cellular Component	3
cilium	1.10416	Cellular Component	3
cytoplasmic stress granule	1.10416	Cellular Component	3
kinetochore	1.10416	Cellular Component	3
myelin sheath	1.10416	Cellular Component	3
preribosome, large subunit precursor	1.10416	Cellular Component	3
Cajal body	1.10416	Cellular Component	3
endosome membrane	1.10416	Cellular Component	3
basal plasma membrane	1.10416	Cellular Component	3
clathrin-coated pit	1.10416	Cellular Component	3
platelet dense granule membrane	1.10416	Cellular Component	3
peroxisome	1.10416	Cellular Component	3
postsynaptic density	1.10416	Cellular Component	3
protein phosphatase type 2A complex	1.10416	Cellular Component	3
sarcomere	1.10416	Cellular Component	3
Golgi stack	1.10416	Cellular Component	3
heterotrimeric G-protein complex	1.10416	Cellular Component	3
Ragulator complex	0.736106	Cellular Component	2
transport vesicle	0.736106	Cellular Component	2
midbody	0.736106	Cellular Component	2
cytoplasmic dynein complex	0.736106	Cellular Component	2
recycling endosome membrane	0.736106	Cellular Component	2
sarcoplasmic reticulum	0.736106	Cellular Component	2
membrane coat	0.736106	Cellular Component	2
spindle microtubule	0.736106	Cellular Component	2
core-binding factor complex	0.736106	Cellular Component	2
cell projection	0.736106	Cellular Component	2
lysosomal lumen	0.736106	Cellular Component	2
cell	0.736106	Cellular Component	2
clathrin-coated vesicle	0.736106	Cellular Component	2
ciliary basal body	0.736106	Cellular Component	2
bicellular tight junction	0.736106	Cellular Component	2
cleavage furrow	0.736106	Cellular Component	2
endoplasmic reticulum lumen	0.736106	Cellular Component	2
integral component of endoplasmic reticulum membrane	0.736106	Cellular Component	2
COP9 signalosome	0.736106	Cellular Component	2
caveola	0.736106	Cellular Component	2
vacuole	0.736106	Cellular Component	2
cytosolic small ribosomal subunit	0.736106	Cellular Component	2
BMP receptor complex	0.736106	Cellular Component	2
cyclin-dependent protein kinase holoenzyme complex	0.736106	Cellular Component	2
neuromuscular junction	0.736106	Cellular Component	2
SCF ubiquitin ligase complex	0.736106	Cellular Component	2
Grb2-EGFR complex	0.736106	Cellular Component	2
lamellipodium	0.736106	Cellular Component	2
vesicle membrane	0.736106	Cellular Component	2
chloride channel complex	0.736106	Cellular Component	2
actin cytoskeleton	0.736106	Cellular Component	2
mitochondrial inner membrane	0.736106	Cellular Component	2
cytoplasmic microtubule	0.736106	Cellular Component	2
dendrite	0.736106	Cellular Component	2
centriole	0.736106	Cellular Component	2
sarcoplasmic reticulum lumen	0.736106	Cellular Component	2
stress fiber	0.368053	Cellular Component	1
brush border	0.368053	Cellular Component	1
intrinsic component of plasma membrane	0.368053	Cellular Component	1
cell-cell adherens junction	0.368053	Cellular Component	1
Gtr1-Gtr2 GTPase complex	0.368053	Cellular Component	1
PTW/PP1 phosphatase complex	0.368053	Cellular Component	1
molybdopterin synthase complex	0.368053	Cellular Component	1
sarcoplasmic reticulum membrane	0.368053	Cellular Component	1
dystrophin-associated glycoprotein complex	0.368053	Cellular Component	1
growth cone	0.368053	Cellular Component	1
cytoplasmic exosome (RNase complex)	0.368053	Cellular Component	1
phagocytic vesicle	0.368053	Cellular Component	1
sarcolemma	0.368053	Cellular Component	1
vacuolar membrane	0.368053	Cellular Component	1
eukaryotic translation elongation factor 1 complex	0.368053	Cellular Component	1
catalytic step 2 spliceosome	0.368053	Cellular Component	1
chromosome, telomeric region	0.368053	Cellular Component	1
keratin filament	0.368053	Cellular Component	1
vesicle	0.368053	Cellular Component	1
Cul3-RING ubiquitin ligase complex	0.368053	Cellular Component	1
Golgi cisterna membrane	0.368053	Cellular Component	1
transmembrane transporter complex	0.368053	Cellular Component	1
connexin complex	0.368053	Cellular Component	1
cell body	0.368053	Cellular Component	1
actomyosin	0.368053	Cellular Component	1
extrinsic component of cytoplasmic side of plasma membrane	0.368053	Cellular Component	1
collagen type V trimer	0.368053	Cellular Component	1
cortical actin cytoskeleton	0.368053	Cellular Component	1
proton-transporting V-type ATPase, V1 domain	0.368053	Cellular Component	1
EGO complex	0.368053	Cellular Component	1
elongin complex	0.368053	Cellular Component	1
dynactin complex	0.368053	Cellular Component	1
spliceosomal tri-snRNP complex	0.368053	Cellular Component	1
mitochondrial respiratory chain complex I	0.368053	Cellular Component	1
U5 snRNP	0.368053	Cellular Component	1
ribosome	0.368053	Cellular Component	1
myosin II complex	0.368053	Cellular Component	1
myosin II filament	0.368053	Cellular Component	1
anchored component of membrane	0.368053	Cellular Component	1
COPI vesicle coat	0.368053	Cellular Component	1
MOZ/MORF histone acetyltransferase complex	0.368053	Cellular Component	1
retromer complex	0.368053	Cellular Component	1
dolichol-phosphate-mannose synthase complex	0.368053	Cellular Component	1
low-density lipoprotein particle	0.368053	Cellular Component	1
U6 snRNP	0.368053	Cellular Component	1
condensed nuclear chromosome	0.368053	Cellular Component	1
intermediate filament	0.368053	Cellular Component	1
zonula adherens	0.368053	Cellular Component	1
endocytic vesicle	0.368053	Cellular Component	1
mitochondrial matrix	0.368053	Cellular Component	1
nuclear membrane	0.368053	Cellular Component	1
palmitoyltransferase complex	0.368053	Cellular Component	1
RIC1-RGP1 guanyl-nucleotide exchange factor complex	0.368053	Cellular Component	1
calcium channel complex	0.368053	Cellular Component	1
terminal cisterna	0.368053	Cellular Component	1
nuclear transcription factor complex	0.368053	Cellular Component	1
integral component of nuclear inner membrane	0.368053	Cellular Component	1
spindle pole	0.368053	Cellular Component	1
receptor complex	0.368053	Cellular Component	1
VCB complex	0.368053	Cellular Component	1
spectrin	0.368053	Cellular Component	1
intercalated disc	0.368053	Cellular Component	1
ion channel complex	0.368053	Cellular Component	1
axon	0.368053	Cellular Component	1
TIM23 mitochondrial import inner membrane translocase complex	0.368053	Cellular Component	1
nuclear aryl hydrocarbon receptor complex	0.368053	Cellular Component	1
endoplasmic reticulum-Golgi intermediate compartment membrane	0.368053	Cellular Component	1
nuclear matrix	0.368053	Cellular Component	1
immunological synapse	0.368053	Cellular Component	1
signal recognition particle receptor complex	0.368053	Cellular Component	1
membrane raft	0.368053	Cellular Component	1
catenin complex	0.368053	Cellular Component	1
synaptic vesicle membrane	0.368053	Cellular Component	1
gap junction	0.368053	Cellular Component	1
ESCRT III complex	0.368053	Cellular Component	1
recycling endosome	0.368053	Cellular Component	1
metal ion binding	86.8605	Molecular Function	118
nucleotide binding	65.5134	Molecular Function	89
ATP binding	55.9441	Molecular Function	76
transferase activity	48.583	Molecular Function	66
DNA-binding transcription factor activity	46.3747	Molecular Function	63
nucleic acid binding	39.0136	Molecular Function	53
protein binding	38.2775	Molecular Function	52
hydrolase activity	36.8053	Molecular Function	50
sequence-specific DNA binding	35.3331	Molecular Function	48
GTP binding	33.1248	Molecular Function	45
DNA binding	30.9165	Molecular Function	42
protein kinase binding	30.1803	Molecular Function	41
RNA polymerase II proximal promoter sequence-specific DNA binding	30.1803	Molecular Function	41
zinc ion binding	27.972	Molecular Function	38
protein serine/threonine kinase activity	26.4998	Molecular Function	36
protein kinase activity	25.7637	Molecular Function	35
kinase activity	23.5554	Molecular Function	32
calcium ion binding	22.8193	Molecular Function	31
protein homodimerization activity	22.0832	Molecular Function	30
transcription regulatory region DNA binding	20.611	Molecular Function	28
beta-catenin binding	19.1388	Molecular Function	26
GTPase activity	18.4026	Molecular Function	25
protein heterodimerization activity	18.4026	Molecular Function	25
armadillo repeat domain binding	16.9304	Molecular Function	23
nuclear hormone receptor binding	16.9304	Molecular Function	23
RNA polymerase II repressing transcription factor binding	16.1943	Molecular Function	22
transferase activity, transferring glycosyl groups	16.1943	Molecular Function	22
gamma-catenin binding	16.1943	Molecular Function	22
RNA binding	14.7221	Molecular Function	20
catalytic activity	13.986	Molecular Function	19
DNA-binding transcription factor activity, RNA polymerase II-specific	13.2499	Molecular Function	18
actin binding	13.2499	Molecular Function	18
phosphoprotein phosphatase activity	13.2499	Molecular Function	18
phosphatase activity	11.7777	Molecular Function	16
enhancer sequence-specific DNA binding	11.0416	Molecular Function	15
transcription corepressor activity	10.3055	Molecular Function	14
ATPase activity	10.3055	Molecular Function	14
N-acetyltransferase activity	9.56938	Molecular Function	13
protein N-terminus binding	9.56938	Molecular Function	13
protein tyrosine phosphatase activity	9.56938	Molecular Function	13
nuclear receptor binding	9.56938	Molecular Function	13
nucleosomal DNA binding	8.83327	Molecular Function	12
beta-galactoside (CMP) alpha-2,3-sialyltransferase activity	8.83327	Molecular Function	12
N-acetyllactosaminide alpha-2,3-sialyltransferase activity	8.83327	Molecular Function	12
RNA polymerase II distal enhancer sequence-specific DNA binding	8.83327	Molecular Function	12
sialyltransferase activity	8.83327	Molecular Function	12
ubiquitin protein ligase binding	8.09717	Molecular Function	11
protein dimerization activity	8.09717	Molecular Function	11
magnesium ion binding	8.09717	Molecular Function	11
G protein-coupled receptor activity	8.09717	Molecular Function	11
SMAD binding	7.36106	Molecular Function	10
SH3/SH2 adaptor activity	6.62495	Molecular Function	9
activin receptor activity, type I	6.62495	Molecular Function	9
transforming growth factor beta binding	6.62495	Molecular Function	9
activin binding	6.62495	Molecular Function	9
transcription regulatory region sequence-specific DNA binding	6.62495	Molecular Function	9
transforming growth factor beta receptor activity, type I	6.62495	Molecular Function	9
phosphatidylinositol binding	6.62495	Molecular Function	9
microtubule motor activity	6.62495	Molecular Function	9
ubiquitin-protein transferase activity	6.62495	Molecular Function	9
ribose phosphate diphosphokinase activity	5.88885	Molecular Function	8
peptidase activity	5.88885	Molecular Function	8
guanyl-nucleotide exchange factor activity	5.88885	Molecular Function	8
1-phosphatidylinositol-3-kinase regulator activity	5.88885	Molecular Function	8
identical protein binding	5.15274	Molecular Function	7
cytoskeletal protein binding	5.15274	Molecular Function	7
aspartic endopeptidase activity, intramembrane cleaving	5.15274	Molecular Function	7
structural constituent of ribosome	5.15274	Molecular Function	7
protein domain specific binding	5.15274	Molecular Function	7
oxidoreductase activity	5.15274	Molecular Function	7
transporter activity	4.41664	Molecular Function	6
linoleoyl-CoA desaturase activity	4.41664	Molecular Function	6
RNA polymerase II regulatory region sequence-specific DNA binding	4.41664	Molecular Function	6
helicase activity	4.41664	Molecular Function	6
metallopeptidase activity	4.41664	Molecular Function	6
clathrin binding	4.41664	Molecular Function	6
GTPase activator activity	4.41664	Molecular Function	6
ATP-dependent RNA helicase activity	4.41664	Molecular Function	6
hydrolase activity, acting on glycosyl bonds	4.41664	Molecular Function	6
transcription factor binding	3.68053	Molecular Function	5
metalloaminopeptidase activity	3.68053	Molecular Function	5
PDZ domain binding	3.68053	Molecular Function	5
enzyme binding	3.68053	Molecular Function	5
ATPase-coupled calcium transmembrane transporter activity	3.68053	Molecular Function	5
peptide binding	3.68053	Molecular Function	5
transmembrane receptor protein serine/threonine kinase activity	3.68053	Molecular Function	5
ephrin receptor binding	3.68053	Molecular Function	5
heparin binding	3.68053	Molecular Function	5
aspartic-type endopeptidase activity	3.68053	Molecular Function	5
G protein-coupled receptor binding	3.68053	Molecular Function	5
protein kinase inhibitor activity	3.68053	Molecular Function	5
insulin-like growth factor binding	3.68053	Molecular Function	5
motor activity	2.94442	Molecular Function	4
NAD+ ADP-ribosyltransferase activity	2.94442	Molecular Function	4
isomerase activity	2.94442	Molecular Function	4
calmodulin binding	2.94442	Molecular Function	4
exonuclease activity	2.94442	Molecular Function	4
phospholipid binding	2.94442	Molecular Function	4
mRNA binding	2.94442	Molecular Function	4
mRNA 3'-UTR binding	2.94442	Molecular Function	4
N,N-dimethylaniline monooxygenase activity	2.94442	Molecular Function	4
serine-type endopeptidase activity	2.94442	Molecular Function	4
electron transfer activity	2.94442	Molecular Function	4
iron-sulfur cluster binding	2.94442	Molecular Function	4
metalloendopeptidase activity	2.94442	Molecular Function	4
lipid binding	2.94442	Molecular Function	4
transcription coactivator activity	2.94442	Molecular Function	4
ribosomal large subunit binding	2.94442	Molecular Function	4
protein C-terminus binding	2.94442	Molecular Function	4
heme binding	2.20832	Molecular Function	3
lyase activity	2.20832	Molecular Function	3
oxidoreductase activity, acting on paired donors, with incorporation or reduction of molecular oxygen	2.20832	Molecular Function	3
copper ion binding	2.20832	Molecular Function	3
G-protein beta/gamma-subunit complex binding	2.20832	Molecular Function	3
histone-lysine N-methyltransferase activity	2.20832	Molecular Function	3
sodium-dependent L-ascorbate transmembrane transporter activity	2.20832	Molecular Function	3
microtubule binding	2.20832	Molecular Function	3
SH3 domain binding	2.20832	Molecular Function	3
iron ion binding	2.20832	Molecular Function	3
transmembrane receptor protein tyrosine kinase activity	2.20832	Molecular Function	3
ion channel binding	2.20832	Molecular Function	3
enzyme activator activity	2.20832	Molecular Function	3
G protein-coupled glutamate receptor binding	2.20832	Molecular Function	3
chromatin binding	2.20832	Molecular Function	3
protein phosphatase binding	2.20832	Molecular Function	3
inositol-1,4,5-trisphosphate 3-kinase activity	2.20832	Molecular Function	3
signaling receptor binding	2.20832	Molecular Function	3
L-ascorbate:sodium symporter activity	2.20832	Molecular Function	3
acetylglucosaminyltransferase activity	2.20832	Molecular Function	3
enoyl-CoA hydratase activity	2.20832	Molecular Function	3
1-phosphatidylinositol binding	2.20832	Molecular Function	3
RNA polymerase III activity	2.20832	Molecular Function	3
core promoter sequence-specific DNA binding	2.20832	Molecular Function	3
protein disulfide oxidoreductase activity	2.20832	Molecular Function	3
transcription coregulator activity	2.20832	Molecular Function	3
methyltransferase activity	2.20832	Molecular Function	3
cysteine-type endopeptidase activity	2.20832	Molecular Function	3
hydrolase activity, hydrolyzing O-glycosyl compounds	2.20832	Molecular Function	3
protein tyrosine kinase activity	2.20832	Molecular Function	3
cAMP response element binding	2.20832	Molecular Function	3
endopeptidase activity	2.20832	Molecular Function	3
microtubule-severing ATPase activity	2.20832	Molecular Function	3
L-ascorbic acid binding	2.20832	Molecular Function	3
5'-nucleotidase activity	2.20832	Molecular Function	3
calcium-dependent cysteine-type endopeptidase activity	2.20832	Molecular Function	3
translation elongation factor activity	2.20832	Molecular Function	3
transmembrane signaling receptor activity	2.20832	Molecular Function	3
serine-type endopeptidase inhibitor activity	2.20832	Molecular Function	3
G protein-coupled receptor kinase activity	1.47221	Molecular Function	2
SNAP receptor activity	1.47221	Molecular Function	2
carbohydrate binding	1.47221	Molecular Function	2
transforming growth factor beta receptor binding	1.47221	Molecular Function	2
protein tyrosine/serine/threonine phosphatase activity	1.47221	Molecular Function	2
cyclin binding	1.47221	Molecular Function	2
FK506 binding	1.47221	Molecular Function	2
protein xylosyltransferase activity	1.47221	Molecular Function	2
sulfotransferase activity	1.47221	Molecular Function	2
3-phosphoinositide-dependent protein kinase activity	1.47221	Molecular Function	2
MAP kinase kinase kinase activity	1.47221	Molecular Function	2
metallocarboxypeptidase activity	1.47221	Molecular Function	2
Ran GTPase binding	1.47221	Molecular Function	2
receptor tyrosine kinase binding	1.47221	Molecular Function	2
insulin-like growth factor I binding	1.47221	Molecular Function	2
sphingosine-1-phosphate receptor activity	1.47221	Molecular Function	2
glutathione binding	1.47221	Molecular Function	2
lithium ion binding	1.47221	Molecular Function	2
MAP kinase kinase kinase kinase activity	1.47221	Molecular Function	2
insulin-like growth factor II binding	1.47221	Molecular Function	2
alpha-1,2-galactosyltransferase activity	1.47221	Molecular Function	2
methylated histone binding	1.47221	Molecular Function	2
glutathione transferase activity	1.47221	Molecular Function	2
2 iron, 2 sulfur cluster binding	1.47221	Molecular Function	2
calcium-dependent protein kinase C activity	1.47221	Molecular Function	2
ribosome binding	1.47221	Molecular Function	2
prostaglandin-E synthase activity	1.47221	Molecular Function	2
JUN kinase kinase activity	1.47221	Molecular Function	2
amyloid-beta binding	1.47221	Molecular Function	2
alkaline phosphatase activity	1.47221	Molecular Function	2
fibronectin binding	1.47221	Molecular Function	2
extracellular matrix structural constituent	1.47221	Molecular Function	2
p53 binding	1.47221	Molecular Function	2
actin filament binding	1.47221	Molecular Function	2
neurotrophin TRKA receptor binding	1.47221	Molecular Function	2
oxidoreductase activity, acting on the CH-NH2 group of donors, oxygen as acceptor	1.47221	Molecular Function	2
AMP-activated protein kinase activity	1.47221	Molecular Function	2
structural constituent of muscle	1.47221	Molecular Function	2
peptidyl-prolyl cis-trans isomerase activity	1.47221	Molecular Function	2
cyclin-dependent protein kinase activating kinase activity	1.47221	Molecular Function	2
Rab guanyl-nucleotide exchange factor activity	1.47221	Molecular Function	2
structural molecule activity	1.47221	Molecular Function	2
SAP kinase activity	1.47221	Molecular Function	2
single-stranded DNA binding	1.47221	Molecular Function	2
MAP kinase kinase activity	1.47221	Molecular Function	2
epidermal growth factor receptor binding	1.47221	Molecular Function	2
DNA-dependent protein kinase activity	1.47221	Molecular Function	2
beta-N-acetylhexosaminidase activity	1.47221	Molecular Function	2
cyclin-dependent protein serine/threonine kinase regulator activity	1.47221	Molecular Function	2
growth factor activity	1.47221	Molecular Function	2
chloride channel activity	1.47221	Molecular Function	2
ribosomal protein S6 kinase activity	1.47221	Molecular Function	2
manganese ion binding	1.47221	Molecular Function	2
ligase activity	1.47221	Molecular Function	2
dolichyl pyrophosphate Glc1Man9GlcNAc2 alpha-1,3-glucosyltransferase activity	1.47221	Molecular Function	2
MHC class II protein complex binding	1.47221	Molecular Function	2
hyalurononglucosaminidase activity	1.47221	Molecular Function	2
phosphoserine residue binding	1.47221	Molecular Function	2
calcium-dependent phospholipid binding	1.47221	Molecular Function	2
protease binding	1.47221	Molecular Function	2
potassium channel regulator activity	1.47221	Molecular Function	2
MAP kinase tyrosine/serine/threonine phosphatase activity	1.47221	Molecular Function	2
protein tag	1.47221	Molecular Function	2
JUN kinase kinase kinase activity	1.47221	Molecular Function	2
insulin receptor substrate binding	1.47221	Molecular Function	2
fibroblast growth factor binding	1.47221	Molecular Function	2
cyclic nucleotide-dependent protein kinase activity	1.47221	Molecular Function	2
serine-type carboxypeptidase activity	1.47221	Molecular Function	2
ion channel activity	1.47221	Molecular Function	2
NF-kappaB-inducing kinase activity	1.47221	Molecular Function	2
transmembrane receptor protein kinase activity	1.47221	Molecular Function	2
calmodulin-dependent protein kinase activity	1.47221	Molecular Function	2
9-phenanthrol UDP-glucuronosyltransferase activity	1.47221	Molecular Function	2
R-SMAD binding	1.47221	Molecular Function	2
myosin binding	1.47221	Molecular Function	2
calcium-dependent protein serine/threonine kinase activity	1.47221	Molecular Function	2
JUN kinase activity	1.47221	Molecular Function	2
histone deacetylase binding	1.47221	Molecular Function	2
ubiquitin binding	1.47221	Molecular Function	2
ADP-ribosylation factor binding	1.47221	Molecular Function	2
frizzled binding	1.47221	Molecular Function	2
eukaryotic translation initiation factor 2alpha kinase activity	1.47221	Molecular Function	2
GTP-dependent protein kinase activity	1.47221	Molecular Function	2
4 iron, 4 sulfur cluster binding	1.47221	Molecular Function	2
Rho guanyl-nucleotide exchange factor activity	1.47221	Molecular Function	2
BMP receptor binding	1.47221	Molecular Function	2
inositol monophosphate 1-phosphatase activity	1.47221	Molecular Function	2
1,2-dihydroxy-phenanthrene glycosyltransferase activity	1.47221	Molecular Function	2
double-stranded DNA binding	1.47221	Molecular Function	2
cytokine activity	1.47221	Molecular Function	2
thyroid hormone transmembrane transporter activity	0.736106	Molecular Function	1
single-stranded RNA binding	0.736106	Molecular Function	1
G protein-coupled chemoattractant receptor activity	0.736106	Molecular Function	1
trans-o-hydroxybenzylidenepyruvate hydratase-aldolase activity	0.736106	Molecular Function	1
AU-rich element binding	0.736106	Molecular Function	1
starch alpha-glucosidase activity	0.736106	Molecular Function	1
enzyme inhibitor activity	0.736106	Molecular Function	1
naphthyl-2-methylene-succinyl-CoA lyase activity	0.736106	Molecular Function	1
phosphatase regulator activity	0.736106	Molecular Function	1
L-serine hydro-lyase (adding indole, L-tryptophan-forming) activity	0.736106	Molecular Function	1
monooxygenase activity	0.736106	Molecular Function	1
dipeptidase activity	0.736106	Molecular Function	1
vitamin D receptor binding	0.736106	Molecular Function	1
proton transmembrane transporter activity	0.736106	Molecular Function	1
mannosidase activity	0.736106	Molecular Function	1
ADP binding	0.736106	Molecular Function	1
N-terminal myristoylation domain binding	0.736106	Molecular Function	1
nucleotidyltransferase activity	0.736106	Molecular Function	1
tetrahydrofolylpolyglutamate synthase activity	0.736106	Molecular Function	1
cadherin binding	0.736106	Molecular Function	1
L-erythro-3-methylmalyl-CoA dehydratase activity	0.736106	Molecular Function	1
cytoskeletal adaptor activity	0.736106	Molecular Function	1
phosphatidate cytidylyltransferase activity	0.736106	Molecular Function	1
trans-4-(1'-hydroxynaphth-2'-yl)-2-oxobut-3-enoate hydratase-aldolase activity	0.736106	Molecular Function	1
oxidoreductase activity, acting on single donors with incorporation of molecular oxygen, incorporation of two atoms of oxygen	0.736106	Molecular Function	1
keratin filament binding	0.736106	Molecular Function	1
U6 snRNA binding	0.736106	Molecular Function	1
translation initiation factor activity	0.736106	Molecular Function	1
6-carboxy-5,6,7,8-tetrahydropterin synthase activity	0.736106	Molecular Function	1
ubiquitin protein ligase activity	0.736106	Molecular Function	1
phosphatidylinositol-3,5-bisphosphate binding	0.736106	Molecular Function	1
trehalase activity	0.736106	Molecular Function	1
L-lysine transmembrane transporter activity	0.736106	Molecular Function	1
2-methylhex-2-enoyl-CoA hydratase activity	0.736106	Molecular Function	1
mannosyl-oligosaccharide 1,2-alpha-mannosidase activity	0.736106	Molecular Function	1
histone demethylase activity (H3-K27 specific)	0.736106	Molecular Function	1
nuclear receptor activity	0.736106	Molecular Function	1
glutathione peroxidase activity	0.736106	Molecular Function	1
UDP-N-acetylmuramoylalanyl-D-glutamyl-2,6-diaminopimelate-D-alanyl-D-alanine ligase activity	0.736106	Molecular Function	1
ion transmembrane transporter activity	0.736106	Molecular Function	1
3-dehydroshikimate dehydratase activity	0.736106	Molecular Function	1
G protein-coupled serotonin receptor binding	0.736106	Molecular Function	1
P-P-bond-hydrolysis-driven protein transmembrane transporter activity	0.736106	Molecular Function	1
procollagen galactosyltransferase activity	0.736106	Molecular Function	1
Rho GTPase binding	0.736106	Molecular Function	1
dolichyl-phosphate beta-D-mannosyltransferase activity	0.736106	Molecular Function	1
3-methyl-5-hydroxy-6-(3-carboxy-3-oxopropenyl)-1H-2-pyridon hydratase-aldolase activity	0.736106	Molecular Function	1
C-X-C chemokine receptor activity	0.736106	Molecular Function	1
calcium-dependent protein binding	0.736106	Molecular Function	1
chemokine receptor activity	0.736106	Molecular Function	1
(3R)-hydroxymyristoyl-[acyl-carrier-protein] dehydratase activity	0.736106	Molecular Function	1
protein-glutamine gamma-glutamyltransferase activity	0.736106	Molecular Function	1
mu-type opioid receptor binding	0.736106	Molecular Function	1
histone binding	0.736106	Molecular Function	1
protein-cysteine S-palmitoyltransferase activity	0.736106	Molecular Function	1
tubulin-glutamic acid ligase activity	0.736106	Molecular Function	1
guanyl nucleotide binding	0.736106	Molecular Function	1
low-density lipoprotein particle receptor activity	0.736106	Molecular Function	1
lipid phosphatase activity	0.736106	Molecular Function	1
platelet-derived growth factor alpha-receptor activity	0.736106	Molecular Function	1
3-hydroxyacyl-CoA dehydratase activity	0.736106	Molecular Function	1
fucosidase activity	0.736106	Molecular Function	1
dextrin alpha-glucosidase activity	0.736106	Molecular Function	1
actin-dependent ATPase activity	0.736106	Molecular Function	1
superoxide dismutase activity	0.736106	Molecular Function	1
beta-6-sulfate-N-acetylglucosaminidase activity	0.736106	Molecular Function	1
coenzyme F420-2 alpha-glutamyl ligase activity	0.736106	Molecular Function	1
transaminase activity	0.736106	Molecular Function	1
copper chaperone activity	0.736106	Molecular Function	1
fumarylacetoacetase activity	0.736106	Molecular Function	1
purine nucleotide binding	0.736106	Molecular Function	1
1-phosphatidylinositol-4-phosphate 5-kinase activity	0.736106	Molecular Function	1
peptide hormone binding	0.736106	Molecular Function	1
cyclin-dependent protein serine/threonine kinase inhibitor activity	0.736106	Molecular Function	1
double-stranded RNA binding	0.736106	Molecular Function	1
4-methyloct-2-enoyl-CoA hydratase activity	0.736106	Molecular Function	1
enhancer binding	0.736106	Molecular Function	1
betaine-homocysteine S-methyltransferase activity	0.736106	Molecular Function	1
cysteine-type endopeptidase inhibitor activity involved in apoptotic process	0.736106	Molecular Function	1
Rac GTPase binding	0.736106	Molecular Function	1
aldehyde dehydrogenase (NAD) activity	0.736106	Molecular Function	1
structural constituent of cytoskeleton	0.736106	Molecular Function	1
ARF guanyl-nucleotide exchange factor activity	0.736106	Molecular Function	1
low-density lipoprotein particle binding	0.736106	Molecular Function	1
corticotropin-releasing hormone receptor 1 binding	0.736106	Molecular Function	1
S-adenosylmethionine-homocysteine S-methyltransferase activity	0.736106	Molecular Function	1
enzyme regulator activity	0.736106	Molecular Function	1
tubulin-glycine ligase activity	0.736106	Molecular Function	1
NF-kappaB binding	0.736106	Molecular Function	1
2-hydroxydec-2,4-diene-1,10-dioate hydratase activity	0.736106	Molecular Function	1
protein kinase C binding	0.736106	Molecular Function	1
spectrin binding	0.736106	Molecular Function	1
glycine transmembrane transporter activity	0.736106	Molecular Function	1
thioesterase binding	0.736106	Molecular Function	1
protein-glycine ligase activity, elongating	0.736106	Molecular Function	1
metalloexopeptidase activity	0.736106	Molecular Function	1
protein phosphatase 2A binding	0.736106	Molecular Function	1
2-keto-3-deoxygluconate aldolase activity	0.736106	Molecular Function	1
methylmalonate-semialdehyde dehydrogenase (acylating) activity	0.736106	Molecular Function	1
titin binding	0.736106	Molecular Function	1
transferase activity, transferring selenium-containing groups	0.736106	Molecular Function	1
cytokine receptor activity	0.736106	Molecular Function	1
E-phenylitaconyl-CoA hydratase activity	0.736106	Molecular Function	1
ferric iron binding	0.736106	Molecular Function	1
heme oxygenase (decyclizing) activity	0.736106	Molecular Function	1
nuclear receptor transcription coactivator activity	0.736106	Molecular Function	1
amylase activity	0.736106	Molecular Function	1
gap junction hemi-channel activity	0.736106	Molecular Function	1
parathyroid hormone receptor activity	0.736106	Molecular Function	1
aromatic amino acid transmembrane transporter activity	0.736106	Molecular Function	1
dipeptidyl-peptidase activity	0.736106	Molecular Function	1
oxidoreductase activity, acting on the aldehyde or oxo group of donors, NAD or NADP as acceptor	0.736106	Molecular Function	1
ATP-dependent microtubule motor activity, plus-end-directed	0.736106	Molecular Function	1
protein serine/threonine/tyrosine kinase activity	0.736106	Molecular Function	1
insulin receptor binding	0.736106	Molecular Function	1
coenzyme F420-0 gamma-glutamyl ligase activity	0.736106	Molecular Function	1
protein serine/threonine phosphatase activity	0.736106	Molecular Function	1
steroid hormone receptor activity	0.736106	Molecular Function	1
phosphatidylinositol-4,5-bisphosphate binding	0.736106	Molecular Function	1
procollagen-proline 4-dioxygenase activity	0.736106	Molecular Function	1
gap junction channel activity	0.736106	Molecular Function	1
fibroblast growth factor-activated receptor activity	0.736106	Molecular Function	1
dihydrofolate synthase activity	0.736106	Molecular Function	1
1,2-bis(4-hydroxyphenyl)-2-proponol dehydratase activity	0.736106	Molecular Function	1
protein disulfide isomerase activity	0.736106	Molecular Function	1
transforming growth factor beta receptor activity, type II	0.736106	Molecular Function	1
diamine N-acetyltransferase activity	0.736106	Molecular Function	1
Roundabout binding	0.736106	Molecular Function	1
ribosomal S6-glutamic acid ligase activity	0.736106	Molecular Function	1
alpha-catenin binding	0.736106	Molecular Function	1
RNA polymerase II core promoter sequence-specific DNA binding	0.736106	Molecular Function	1
laminin binding	0.736106	Molecular Function	1
oxidoreductase activity, acting on paired donors, with incorporation or reduction of molecular oxygen, reduced ascorbate as one donor, and incorporation of one atom of oxygen	0.736106	Molecular Function	1
ADP-dependent NAD(P)H-hydrate dehydratase activity	0.736106	Molecular Function	1
aconitate hydratase activity	0.736106	Molecular Function	1
protein-glutamic acid ligase activity	0.736106	Molecular Function	1
peroxidase activity	0.736106	Molecular Function	1
Rab GTPase binding	0.736106	Molecular Function	1
very-low-density lipoprotein particle receptor activity	0.736106	Molecular Function	1
phospholipid scramblase activity	0.736106	Molecular Function	1
ubiquitin conjugating enzyme activity	0.736106	Molecular Function	1
Wnt-protein binding	0.736106	Molecular Function	1
signal recognition particle binding	0.736106	Molecular Function	1
2-hydroxyisobutyrate dehydratase activity	0.736106	Molecular Function	1
trans-4-[2-(3-hydroxy)-thionaphthenyl]-2-oxo-3-butenoate hydratase activity	0.736106	Molecular Function	1
protein phosphatase activator activity	0.736106	Molecular Function	1
5-chloro-2-oxopent-4-enoate hydratase activity	0.736106	Molecular Function	1
semaphorin receptor activity	0.736106	Molecular Function	1
limonene 8-hydratase activity	0.736106	Molecular Function	1
metalloendopeptidase inhibitor activity	0.736106	Molecular Function	1
histone demethylase activity (H3-K9 specific)	0.736106	Molecular Function	1
SUMO-specific protease activity	0.736106	Molecular Function	1
protein-glycine ligase activity	0.736106	Molecular Function	1
gamma-glutamyl carboxylase activity	0.736106	Molecular Function	1
voltage-gated ion channel activity	0.736106	Molecular Function	1
L-aspartate:2-oxoglutarate aminotransferase activity	0.736106	Molecular Function	1
mannosyl-oligosaccharide mannosidase activity	0.736106	Molecular Function	1
guanylate kinase activity	0.736106	Molecular Function	1
endosulfan diol hydrolyase (cyclizing) activity	0.736106	Molecular Function	1
eukaryotic initiation factor 4E binding	0.736106	Molecular Function	1
aryl hydrocarbon receptor binding	0.736106	Molecular Function	1
transferase activity, transferring acyl groups	0.736106	Molecular Function	1
phospholipase binding	0.736106	Molecular Function	1
2-keto-3-deoxygalactonate aldolase activity	0.736106	Molecular Function	1
actin monomer binding	0.736106	Molecular Function	1
2,4,4-trimethylpent-2-enoyl-CoA hydratase activity	0.736106	Molecular Function	1
2-oxo-hept-3-ene-1,7-dioate hydratase activity	0.736106	Molecular Function	1
L-phenylalanine:2-oxoglutarate aminotransferase activity	0.736106	Molecular Function	1
vascular endothelial growth factor-activated receptor activity	0.736106	Molecular Function	1
voltage-gated channel activity	0.736106	Molecular Function	1
perillyl-CoA hydratase activity	0.736106	Molecular Function	1
6-hydroxycyclohex-1-ene-1-carboxyl-CoA hydratase activity	0.736106	Molecular Function	1
glucosidase activity	0.736106	Molecular Function	1
phosphatidylinositol phosphate kinase activity	0.736106	Molecular Function	1
malonate-semialdehyde dehydrogenase (acetylating) activity	0.736106	Molecular Function	1
arginine transmembrane transporter activity	0.736106	Molecular Function	1
pyridoxal phosphate binding	0.736106	Molecular Function	1
microfilament motor activity	0.736106	Molecular Function	1
2-hydroxyhexa-2,4-dienoate hydratase activity	0.736106	Molecular Function	1
ligand-gated ion channel activity	0.736106	Molecular Function	1
tripeptidyl-peptidase activity	0.736106	Molecular Function	1
3-hydroxypropionyl-CoA dehydratase activity	0.736106	Molecular Function	1
protein-glycine ligase activity, initiating	0.736106	Molecular Function	1
menth-2-enone hydratase activity	0.736106	Molecular Function	1
galactosidase activity	0.736106	Molecular Function	1
purinergic nucleotide receptor activity	0.736106	Molecular Function	1
oligosaccharide binding	0.736106	Molecular Function	1
GDP binding	0.736106	Molecular Function	1
glucan endo-1,4-beta-glucosidase activity	0.736106	Molecular Function	1
beta-glucanase activity	0.736106	Molecular Function	1
cyclohex-1-ene-1-carboxyl-CoA hydratase activity	0.736106	Molecular Function	1
tRNA binding	0.736106	Molecular Function	1
ATPase-coupled transmembrane transporter activity	0.736106	Molecular Function	1
transferase activity, transferring phosphorus-containing groups	0.736106	Molecular Function	1
tumor necrosis factor-activated receptor activity	0.736106	Molecular Function	1
transferase activity, transferring acyl groups other than amino-acyl groups	0.736106	Molecular Function	1
transmembrane transporter activity	0.736106	Molecular Function	1
Wnt-activated receptor activity	0.736106	Molecular Function	1
lytic transglycosylase activity	0.736106	Molecular Function	1
acetylenecarboxylate hydratase activity, producing 3-hydroxypropenoate	0.736106	Molecular Function	1
non-membrane spanning protein tyrosine kinase activity	0.736106	Molecular Function	1
extracellularly ATP-gated cation channel activity	0.736106	Molecular Function	1
hexosaminidase activity	0.736106	Molecular Function	1
protein kinase C activity	0.736106	Molecular Function	1
hormone activity	0.736106	Molecular Function	1
iron ion transmembrane transporter activity	0.736106	Molecular Function	1

## Sheet: Cluster 27
GO_term	Percent	Function	Count
protein dephosphorylation	78.13	Biological Process	53
positive regulation of dendrite morphogenesis	72.24	Biological Process	49
negative regulation of receptor signaling pathway via JAK-STAT	67.81	Biological Process	46
neuron differentiation	64.86	Biological Process	44
peptidyl-tyrosine dephosphorylation	63.39	Biological Process	43
presynaptic membrane assembly	63.39	Biological Process	43
regulation of immune response	63.39	Biological Process	43
heterophilic cell-cell adhesion via plasma membrane cell adhesion molecules	63.39	Biological Process	43
phosphate-containing compound metabolic process	61.92	Biological Process	42
transmembrane receptor protein tyrosine phosphatase signaling pathway	61.92	Biological Process	42
chemical synaptic transmission	61.92	Biological Process	42
regulation of transcription, DNA-templated	51.6	Biological Process	35
negative regulation of transcription, DNA-templated	42.75	Biological Process	29
transport	39.8	Biological Process	27
nervous system development	35.38	Biological Process	24
regulation of alternative mRNA splicing, via spliceosome	35.38	Biological Process	24
protein phosphorylation	35.38	Biological Process	24
phosphorylation	33.91	Biological Process	23
signal transduction	32.43	Biological Process	22
transcription, DNA-templated	30.96	Biological Process	21
cell adhesion	30.96	Biological Process	21
proteolysis	28.01	Biological Process	19
mRNA processing	23.59	Biological Process	16
negative regulation of transcription by RNA polymerase II	23.59	Biological Process	16
intracellular signal transduction	22.11	Biological Process	15
transmembrane transport	20.64	Biological Process	14
protein transport	20.64	Biological Process	14
small GTPase mediated signal transduction	20.64	Biological Process	14
positive regulation of transcription, DNA-templated	19.16	Biological Process	13
intracellular protein transport	17.69	Biological Process	12
RNA splicing	17.69	Biological Process	12
cell cycle	17.69	Biological Process	12
multicellular organism development	17.69	Biological Process	12
Wnt signaling pathway	17.69	Biological Process	12
intra-Golgi vesicle-mediated transport	16.22	Biological Process	11
neurogenesis	16.22	Biological Process	11
dephosphorylation	16.22	Biological Process	11
positive regulation of transcription by RNA polymerase II	16.22	Biological Process	11
vesicle-mediated transport	16.22	Biological Process	11
metabolic process	14.74	Biological Process	10
homophilic cell adhesion via plasma membrane adhesion molecules	14.74	Biological Process	10
response to light stimulus	14.74	Biological Process	10
oxidation-reduction process	14.74	Biological Process	10
cell division	14.74	Biological Process	10
endocytosis	14.74	Biological Process	10
lipid metabolic process	14.74	Biological Process	10
regulation of cell shape	13.27	Biological Process	9
nucleosome disassembly	13.27	Biological Process	9
canonical Wnt signaling pathway	13.27	Biological Process	9
regulation of ARF protein signal transduction	13.27	Biological Process	9
cellular response to estrogen stimulus	13.27	Biological Process	9
cell surface receptor signaling pathway	13.27	Biological Process	9
cell migration	13.27	Biological Process	9
ATP-dependent chromatin remodeling	13.27	Biological Process	9
retrograde transport, endosome to Golgi	11.79	Biological Process	8
skeletal muscle fiber development	11.79	Biological Process	8
fin regeneration	11.79	Biological Process	8
protein import into nucleus	11.79	Biological Process	8
carbohydrate metabolic process	11.79	Biological Process	8
transmembrane receptor protein tyrosine kinase signaling pathway	11.79	Biological Process	8
G1/S transition of mitotic cell cycle	10.32	Biological Process	7
cardiac muscle hypertrophy in response to stress	10.32	Biological Process	7
negative regulation of chromatin binding	10.32	Biological Process	7
photoperiodism	10.32	Biological Process	7
methylation	10.32	Biological Process	7
cellular response to glucose stimulus	10.32	Biological Process	7
neural tube development	10.32	Biological Process	7
excitatory postsynaptic potential	10.32	Biological Process	7
multicellular organismal response to stress	10.32	Biological Process	7
ephrin receptor signaling pathway	10.32	Biological Process	7
positive regulation of cardiac muscle hypertrophy in response to stress	10.32	Biological Process	7
protein glycosylation	10.32	Biological Process	7
spinal cord dorsal/ventral patterning	10.32	Biological Process	7
translation	10.32	Biological Process	7
calcineurin-NFAT signaling cascade	10.32	Biological Process	7
regulation of ossification	10.32	Biological Process	7
negative regulation of keratinocyte proliferation	10.32	Biological Process	7
calcium ion transport	10.32	Biological Process	7
endoplasmic reticulum to Golgi vesicle-mediated transport	10.32	Biological Process	7
negative regulation of cell division	10.32	Biological Process	7
regulation of Rho protein signal transduction	10.32	Biological Process	7
circadian rhythm	10.32	Biological Process	7
positive regulation of smoothened signaling pathway	10.32	Biological Process	7
positive regulation of DNA-binding transcription factor activity	10.32	Biological Process	7
negative regulation of dendrite morphogenesis	10.32	Biological Process	7
transition between fast and slow fiber	10.32	Biological Process	7
cellular response to drug	10.32	Biological Process	7
negative regulation of insulin secretion	10.32	Biological Process	7
embryonic digit morphogenesis	10.32	Biological Process	7
hair follicle morphogenesis	10.32	Biological Process	7
modulation of chemical synaptic transmission	10.32	Biological Process	7
calcium-mediated signaling	10.32	Biological Process	7
regulation of vasculature development	10.32	Biological Process	7
response to calcium ion	10.32	Biological Process	7
keratinocyte differentiation	10.32	Biological Process	7
formation of translation preinitiation complex	8.85	Biological Process	6
radial glia guided migration of Purkinje cell	8.85	Biological Process	6
response to copper ion	8.85	Biological Process	6
cytoplasmic translation	8.85	Biological Process	6
regulation of RNA splicing	8.85	Biological Process	6
regulation of smoothened signaling pathway	8.85	Biological Process	6
kidney development	8.85	Biological Process	6
retrograde transport, vesicle recycling within Golgi	8.85	Biological Process	6
neuromuscular process controlling balance	8.85	Biological Process	6
hypotonic salinity response	8.85	Biological Process	6
copper ion transmembrane transport	8.85	Biological Process	6
cardiac muscle tissue morphogenesis	8.85	Biological Process	6
intracellular estrogen receptor signaling pathway	8.85	Biological Process	6
lung development	8.85	Biological Process	6
hemopoiesis	8.85	Biological Process	6
dorsal/ventral pattern formation	8.85	Biological Process	6
regulation of cell population proliferation	8.85	Biological Process	6
dendrite morphogenesis	8.85	Biological Process	6
ion transport	8.85	Biological Process	6
eukaryotic translation initiation factor 4F complex assembly	8.85	Biological Process	6
angiogenesis	8.85	Biological Process	6
inner ear auditory receptor cell differentiation	8.85	Biological Process	6
embryonic viscerocranium morphogenesis	8.85	Biological Process	6
neural crest cell migration	8.85	Biological Process	6
copper ion transport	8.85	Biological Process	6
cytoskeleton organization	8.85	Biological Process	6
regulation of definitive erythrocyte differentiation	8.85	Biological Process	6
cell redox homeostasis	7.37	Biological Process	5
convergent extension involved in gastrulation	7.37	Biological Process	5
chemotaxis	7.37	Biological Process	5
limb development	7.37	Biological Process	5
cellular phosphate ion homeostasis	7.37	Biological Process	5
G protein-coupled receptor signaling pathway	7.37	Biological Process	5
glycerophospholipid catabolic process	7.37	Biological Process	5
cell differentiation	7.37	Biological Process	5
retrograde vesicle-mediated transport, Golgi to endoplasmic reticulum	7.37	Biological Process	5
retrograde transport, endosome to plasma membrane	7.37	Biological Process	5
glomerulus development	7.37	Biological Process	5
negative regulation of stress fiber assembly	7.37	Biological Process	5
Golgi organization	7.37	Biological Process	5
positive regulation of cell migration	7.37	Biological Process	5
response to cold	7.37	Biological Process	5
actin cytoskeleton organization	7.37	Biological Process	5
innate immune response	7.37	Biological Process	5
negative regulation of BMP signaling pathway	7.37	Biological Process	5
intrinsic apoptotic signaling pathway in response to DNA damage	7.37	Biological Process	5
endoplasmic reticulum unfolded protein response	7.37	Biological Process	5
cell-matrix adhesion	7.37	Biological Process	5
response to endoplasmic reticulum stress	5.9	Biological Process	4
Cajal body organization	5.9	Biological Process	4
negative regulation of protein localization to plasma membrane	5.9	Biological Process	4
cartilage development	5.9	Biological Process	4
heart looping	5.9	Biological Process	4
regulation of cell cycle	5.9	Biological Process	4
histone H3-K79 methylation	5.9	Biological Process	4
semaphorin-plexin signaling pathway	5.9	Biological Process	4
non-canonical Wnt signaling pathway	5.9	Biological Process	4
regulation of anion transport	5.9	Biological Process	4
mRNA splicing, via spliceosome	5.9	Biological Process	4
retina development in camera-type eye	5.9	Biological Process	4
phospholipid transport	5.9	Biological Process	4
negative regulation of circadian rhythm	5.9	Biological Process	4
osteoblast differentiation	5.9	Biological Process	4
amino acid transmembrane transport	5.9	Biological Process	4
regulation of collateral sprouting	5.9	Biological Process	4
protein folding	5.9	Biological Process	4
peptidyl-tyrosine autophosphorylation	5.9	Biological Process	4
glycogen metabolic process	5.9	Biological Process	4
convergent extension involved in axis elongation	5.9	Biological Process	4
glutamate secretion	5.9	Biological Process	4
chordate embryonic development	5.9	Biological Process	4
neurotransmitter secretion	5.9	Biological Process	4
regulation of signal transduction	5.9	Biological Process	4
protein sumoylation	5.9	Biological Process	4
regulation of lamellipodium assembly	5.9	Biological Process	4
regulation of actin polymerization or depolymerization	5.9	Biological Process	4
intrinsic apoptotic signaling pathway by p53 class mediator	5.9	Biological Process	4
intestinal epithelial structure maintenance	5.9	Biological Process	4
Golgi to plasma membrane protein transport	5.9	Biological Process	4
regulation of axonogenesis	5.9	Biological Process	4
negative regulation of transforming growth factor beta receptor signaling pathway	5.9	Biological Process	4
digestive tract development	5.9	Biological Process	4
anion transport	5.9	Biological Process	4
mitotic cytokinesis	4.42	Biological Process	3
microtubule anchoring	4.42	Biological Process	3
protein ubiquitination	4.42	Biological Process	3
integrin-mediated signaling pathway	4.42	Biological Process	3
peptidyl-tyrosine phosphorylation	4.42	Biological Process	3
positive regulation of NF-kappaB transcription factor activity	4.42	Biological Process	3
melanosome transport	4.42	Biological Process	3
positive regulation of interleukin-2 secretion	4.42	Biological Process	3
translational initiation	4.42	Biological Process	3
cytokine-mediated signaling pathway	4.42	Biological Process	3
positive regulation of protein localization to plasma membrane	4.42	Biological Process	3
inhibition of cysteine-type endopeptidase activity involved in apoptotic process	4.42	Biological Process	3
somitogenesis	4.42	Biological Process	3
ubiquitin-dependent ERAD pathway	4.42	Biological Process	3
regulation of heart contraction	4.42	Biological Process	3
microtubule organizing center organization	4.42	Biological Process	3
endocytic recycling	4.42	Biological Process	3
exocytosis	4.42	Biological Process	3
protein processing	4.42	Biological Process	3
regulation of epidermal growth factor receptor signaling pathway	4.42	Biological Process	3
ossification	4.42	Biological Process	3
immune system process	4.42	Biological Process	3
chromosome segregation	4.42	Biological Process	3
embryonic cranial skeleton morphogenesis	4.42	Biological Process	3
epidermal growth factor receptor signaling pathway	4.42	Biological Process	3
common-partner SMAD protein phosphorylation	4.42	Biological Process	3
embryonic neurocranium morphogenesis	4.42	Biological Process	3
regulation of mast cell degranulation	4.42	Biological Process	3
actin cytoskeleton reorganization	4.42	Biological Process	3
zinc ion transport	4.42	Biological Process	3
blood vessel morphogenesis	4.42	Biological Process	3
calcium import into the mitochondrion	4.42	Biological Process	3
skeletal system development	4.42	Biological Process	3
muscle organ development	4.42	Biological Process	3
membrane assembly	4.42	Biological Process	3
retina morphogenesis in camera-type eye	4.42	Biological Process	3
regulation of transcription by RNA polymerase II	4.42	Biological Process	3
chorismate metabolic process	4.42	Biological Process	3
definitive hemopoiesis	4.42	Biological Process	3
mitotic spindle assembly	4.42	Biological Process	3
cell population proliferation	4.42	Biological Process	3
negative regulation of collateral sprouting of intact axon in response to injury	2.95	Biological Process	2
fin development	2.95	Biological Process	2
positive regulation of cell population proliferation	2.95	Biological Process	2
left/right pattern formation	2.95	Biological Process	2
translational termination	2.95	Biological Process	2
adrenal gland development	2.95	Biological Process	2
organelle organization	2.95	Biological Process	2
negative chemotaxis	2.95	Biological Process	2
embryonic skeletal joint morphogenesis	2.95	Biological Process	2
cellular response to interferon-gamma	2.95	Biological Process	2
regulation of cytoskeleton organization	2.95	Biological Process	2
axon extension	2.95	Biological Process	2
regulation of canonical Wnt signaling pathway	2.95	Biological Process	2
cranial nerve development	2.95	Biological Process	2
regulation of collateral sprouting in absence of injury	2.95	Biological Process	2
vasculature development	2.95	Biological Process	2
myelination	2.95	Biological Process	2
lateral line system development	2.95	Biological Process	2
polyamine biosynthetic process	2.95	Biological Process	2
platelet activation	2.95	Biological Process	2
defense response to fungus	2.95	Biological Process	2
activation of phospholipase D activity	2.95	Biological Process	2
determination of ventral identity	2.95	Biological Process	2
positive regulation of canonical Wnt signaling pathway	2.95	Biological Process	2
hindbrain development	2.95	Biological Process	2
regulation of bone mineralization	2.95	Biological Process	2
cilium movement	2.95	Biological Process	2
regulation of polarized epithelial cell differentiation	2.95	Biological Process	2
somite rostral/caudal axis specification	2.95	Biological Process	2
histone H4-R3 methylation	2.95	Biological Process	2
regulation of eye photoreceptor cell development	2.95	Biological Process	2
regulation of microtubule motor activity	2.95	Biological Process	2
negative regulation of translation	2.95	Biological Process	2
spermidine biosynthetic process	2.95	Biological Process	2
semaphorin-plexin signaling pathway involved in axon guidance	2.95	Biological Process	2
negative regulation of axon extension	2.95	Biological Process	2
motor neuron axon guidance	2.95	Biological Process	2
pronephros development	2.95	Biological Process	2
autophagosome maturation	2.95	Biological Process	2
renal tubule development	2.95	Biological Process	2
negative regulation of axon extension involved in axon guidance	2.95	Biological Process	2
embryonic caudal fin morphogenesis	2.95	Biological Process	2
negative regulation of autophagosome assembly	2.95	Biological Process	2
microtubule-based movement	2.95	Biological Process	2
S-adenosylmethioninamine biosynthetic process	2.95	Biological Process	2
vesicle transport along microtubule	2.95	Biological Process	2
branchiomotor neuron axon guidance	2.95	Biological Process	2
positive regulation of epithelial to mesenchymal transition	2.95	Biological Process	2
mitotic prophase	2.95	Biological Process	2
regulation of non-canonical Wnt signaling pathway	2.95	Biological Process	2
cation transport	2.95	Biological Process	2
calcium ion homeostasis	2.95	Biological Process	2
endoplasmic reticulum organization	2.95	Biological Process	2
negative regulation of cell differentiation	2.95	Biological Process	2
protein localization to Golgi apparatus	2.95	Biological Process	2
regulation of microtubule polymerization or depolymerization	2.95	Biological Process	2
regulation of cell migration	2.95	Biological Process	2
negative regulation of ceramide biosynthetic process	2.95	Biological Process	2
nuclear migration	2.95	Biological Process	2
determination of heart left/right asymmetry	2.95	Biological Process	2
chaperone-mediated protein folding	2.95	Biological Process	2
regulation of G protein-coupled receptor signaling pathway	2.95	Biological Process	2
establishment of mitotic spindle orientation	2.95	Biological Process	2
regulation of oxidative stress-induced intrinsic apoptotic signaling pathway	2.95	Biological Process	2
positive regulation of proteasomal ubiquitin-dependent protein catabolic process	2.95	Biological Process	2
cellular calcium ion homeostasis	2.95	Biological Process	2
myelination of posterior lateral line nerve axons	2.95	Biological Process	2
regulation of cell growth	2.95	Biological Process	2
protein methylation	2.95	Biological Process	2
UDP-N-acetylglucosamine biosynthetic process	2.95	Biological Process	2
CRD-mediated mRNA stabilization	2.95	Biological Process	2
regulation of axon extension involved in axon guidance	2.95	Biological Process	2
dolichol-linked oligosaccharide biosynthetic process	2.95	Biological Process	2
heart development	2.95	Biological Process	2
toxin metabolic process	2.95	Biological Process	2
cerebellar Purkinje cell layer development	2.95	Biological Process	2
negative regulation of cell population proliferation	2.95	Biological Process	2
myoblast differentiation	2.95	Biological Process	2
protein N-linked glycosylation via asparagine	2.95	Biological Process	2
actin filament depolymerization	2.95	Biological Process	2
pronephros formation	2.95	Biological Process	2
positive regulation of protein binding	2.95	Biological Process	2
camera-type eye morphogenesis	2.95	Biological Process	2
ribosomal subunit export from nucleus	2.95	Biological Process	2
cell migration involved in sprouting angiogenesis	2.95	Biological Process	2
branching morphogenesis of a nerve	2.95	Biological Process	2
chromatin silencing	2.95	Biological Process	2
protein tetramerization	2.95	Biological Process	2
cellular sphingolipid homeostasis	2.95	Biological Process	2
protein deubiquitination	2.95	Biological Process	2
extracellular matrix assembly	2.95	Biological Process	2
SREBP signaling pathway	2.95	Biological Process	2
digestive tract morphogenesis	2.95	Biological Process	2
caudal fin morphogenesis	2.95	Biological Process	2
axis elongation involved in somitogenesis	2.95	Biological Process	2
reactive oxygen species metabolic process	2.95	Biological Process	2
pronephric duct morphogenesis	2.95	Biological Process	2
liver development	2.95	Biological Process	2
lens fiber cell morphogenesis	2.95	Biological Process	2
negative regulation of protein kinase activity	2.95	Biological Process	2
lens morphogenesis in camera-type eye	2.95	Biological Process	2
spermine biosynthetic process	2.95	Biological Process	2
ceramide metabolic process	2.95	Biological Process	2
autophagy	2.95	Biological Process	2
apoptotic process	2.95	Biological Process	2
response to pheromone	1.47	Biological Process	1
protein K69-linked ufmylation	1.47	Biological Process	1
purine nucleotide biosynthetic process	1.47	Biological Process	1
pharyngeal system development	1.47	Biological Process	1
regulation of gene expression	1.47	Biological Process	1
regulation of neuron projection development	1.47	Biological Process	1
L-serine transport	1.47	Biological Process	1
cardiac muscle cell differentiation	1.47	Biological Process	1
cellular zinc ion homeostasis	1.47	Biological Process	1
histone H4-K16 acetylation	1.47	Biological Process	1
plasma membrane tubulation	1.47	Biological Process	1
membrane protein intracellular domain proteolysis	1.47	Biological Process	1
mitochondrial fission	1.47	Biological Process	1
phospholipid biosynthetic process	1.47	Biological Process	1
proline biosynthetic process	1.47	Biological Process	1
10-formyltetrahydrofolate catabolic process	1.47	Biological Process	1
eye photoreceptor cell development	1.47	Biological Process	1
nucleoside metabolic process	1.47	Biological Process	1
nucleosome assembly	1.47	Biological Process	1
regulation of cell proliferation involved in heart valve morphogenesis	1.47	Biological Process	1
tricarboxylic acid cycle	1.47	Biological Process	1
transforming growth factor beta receptor signaling pathway	1.47	Biological Process	1
protein polyubiquitination	1.47	Biological Process	1
cellular response to amino acid stimulus	1.47	Biological Process	1
T cell differentiation	1.47	Biological Process	1
vesicle docking involved in exocytosis	1.47	Biological Process	1
transferrin transport	1.47	Biological Process	1
pentose-phosphate shunt	1.47	Biological Process	1
positive regulation of angiogenesis	1.47	Biological Process	1
determination of dorsal identity	1.47	Biological Process	1
activation of cysteine-type endopeptidase activity involved in apoptotic process	1.47	Biological Process	1
proteasome-mediated ubiquitin-dependent protein catabolic process	1.47	Biological Process	1
regulation of intracellular estrogen receptor signaling pathway	1.47	Biological Process	1
lipid transport	1.47	Biological Process	1
negative regulation of Rho protein signal transduction	1.47	Biological Process	1
brain development	1.47	Biological Process	1
protein localization	1.47	Biological Process	1
positive regulation of pathway-restricted SMAD protein phosphorylation	1.47	Biological Process	1
granulocyte colony-stimulating factor signaling pathway	1.47	Biological Process	1
vasculogenesis	1.47	Biological Process	1
embryonic skeletal system development	1.47	Biological Process	1
brain morphogenesis	1.47	Biological Process	1
DNA methylation	1.47	Biological Process	1
integrin activation	1.47	Biological Process	1
protein secretion	1.47	Biological Process	1
dorsal convergence	1.47	Biological Process	1
neural crest formation	1.47	Biological Process	1
metal ion transport	1.47	Biological Process	1
UDP-galactose transmembrane transport	1.47	Biological Process	1
membrane organization	1.47	Biological Process	1
phosphatidylcholine metabolic process	1.47	Biological Process	1
synaptic transmission, dopaminergic	1.47	Biological Process	1
microtubule nucleation	1.47	Biological Process	1
purine nucleobase biosynthetic process	1.47	Biological Process	1
vitamin B6 metabolic process	1.47	Biological Process	1
response to L-glutamate	1.47	Biological Process	1
regulation of actin filament polymerization	1.47	Biological Process	1
rhombomere boundary formation	1.47	Biological Process	1
neuron migration	1.47	Biological Process	1
regulation of receptor recycling	1.47	Biological Process	1
neutrophil mediated immunity	1.47	Biological Process	1
regulation of actin cytoskeleton organization	1.47	Biological Process	1
SMAD protein signal transduction	1.47	Biological Process	1
notochord development	1.47	Biological Process	1
synaptic vesicle recycling via endosome	1.47	Biological Process	1
ion transmembrane transport	1.47	Biological Process	1
axon guidance	1.47	Biological Process	1
Golgi vesicle fusion to target membrane	1.47	Biological Process	1
carbohydrate transport	1.47	Biological Process	1
negative regulation of angiogenesis	1.47	Biological Process	1
Schwann cell differentiation	1.47	Biological Process	1
branching involved in blood vessel morphogenesis	1.47	Biological Process	1
histone H4-K5 acetylation	1.47	Biological Process	1
heart morphogenesis	1.47	Biological Process	1
protein localization to plasma membrane	1.47	Biological Process	1
signal transduction by protein phosphorylation	1.47	Biological Process	1
myelination in peripheral nervous system	1.47	Biological Process	1
blood vessel lumenization	1.47	Biological Process	1
cell adhesion mediated by integrin	1.47	Biological Process	1
biosynthetic process	1.47	Biological Process	1
macrophage differentiation	1.47	Biological Process	1
regulation of protein phosphorylation	1.47	Biological Process	1
regulation of protein localization to cell surface	1.47	Biological Process	1
de novo' IMP biosynthetic process	1.47	Biological Process	1
regulation of endocytic recycling	1.47	Biological Process	1
response to zinc ion	1.47	Biological Process	1
efferent axon development in posterior lateral line nerve	1.47	Biological Process	1
mitotic spindle organization	1.47	Biological Process	1
muscle fiber development	1.47	Biological Process	1
swim bladder development	1.47	Biological Process	1
facial nucleus development	1.47	Biological Process	1
hypothalamus development	1.47	Biological Process	1
mitochondrial DNA replication	1.47	Biological Process	1
signal peptide processing	1.47	Biological Process	1
double-strand break repair via homologous recombination	1.47	Biological Process	1
proteolysis involved in cellular protein catabolic process	1.47	Biological Process	1
regulation of DNA replication	1.47	Biological Process	1
positive regulation of focal adhesion assembly	1.47	Biological Process	1
melanocyte differentiation	1.47	Biological Process	1
phosphatidylinositol dephosphorylation	1.47	Biological Process	1
glycine catabolic process	1.47	Biological Process	1
de novo' CTP biosynthetic process	1.47	Biological Process	1
protein localization to synapse	1.47	Biological Process	1
cellular response to acidic pH	1.47	Biological Process	1
ear development	1.47	Biological Process	1
embryonic eye morphogenesis	1.47	Biological Process	1
afferent axon development in posterior lateral line nerve	1.47	Biological Process	1
cell-cell recognition	1.47	Biological Process	1
actin filament organization	1.47	Biological Process	1
glycosphingolipid metabolic process	1.47	Biological Process	1
global genome nucleotide-excision repair	1.47	Biological Process	1
cellular amino acid metabolic process	1.47	Biological Process	1
histone H4-K8 acetylation	1.47	Biological Process	1
anterior/posterior pattern specification	1.47	Biological Process	1
positive regulation of DNA replication	1.47	Biological Process	1
microtubule depolymerization	1.47	Biological Process	1
protein insertion into ER membrane	1.47	Biological Process	1
extracellular matrix organization	1.47	Biological Process	1
neuron development	1.47	Biological Process	1
cell development	1.47	Biological Process	1
negative regulation of NF-kappaB transcription factor activity	1.47	Biological Process	1
isocitrate metabolic process	1.47	Biological Process	1
central nervous system morphogenesis	1.47	Biological Process	1
rostrocaudal neural tube patterning	1.47	Biological Process	1
phospholipase C-activating dopamine receptor signaling pathway	1.47	Biological Process	1
positive regulation of multicellular organism growth	1.47	Biological Process	1
de novo' posttranslational protein folding	1.47	Biological Process	1
cell death	1.47	Biological Process	1
SRP-dependent cotranslational protein targeting to membrane	1.47	Biological Process	1
pyrimidine nucleotide biosynthetic process	1.47	Biological Process	1
base-excision repair	1.47	Biological Process	1
proteasome assembly	1.47	Biological Process	1
regulation of apoptotic process	1.47	Biological Process	1
phosphate ion homeostasis	1.47	Biological Process	1
synapse organization	1.47	Biological Process	1
actin filament polymerization	1.47	Biological Process	1
regulation of translational initiation	1.47	Biological Process	1
regulation of protein localization	1.47	Biological Process	1
eye morphogenesis	1.47	Biological Process	1
lamellipodium assembly	1.47	Biological Process	1
neuron projection development	1.47	Biological Process	1
hematopoietic stem cell differentiation	1.47	Biological Process	1
protein K48-linked deubiquitination	1.47	Biological Process	1
adenylate cyclase-activating dopamine receptor signaling pathway	1.47	Biological Process	1
positive regulation of execution phase of apoptosis	1.47	Biological Process	1
sulfur amino acid biosynthetic process	1.47	Biological Process	1
anterior/posterior axis specification	1.47	Biological Process	1
protein K63-linked deubiquitination	1.47	Biological Process	1
forebrain development	1.47	Biological Process	1
cAMP-mediated signaling	1.47	Biological Process	1
bone mineralization	1.47	Biological Process	1
regulation of MAPK cascade	1.47	Biological Process	1
cellular response to light stimulus	1.47	Biological Process	1
planar cell polarity pathway involved in axis elongation	1.47	Biological Process	1
detection of virus	1.47	Biological Process	1
smooth muscle contraction	1.47	Biological Process	1
positive regulation of exocytosis	1.47	Biological Process	1
negative regulation of fibroblast growth factor receptor signaling pathway	1.47	Biological Process	1
notochord morphogenesis	1.47	Biological Process	1
mRNA export from nucleus	1.47	Biological Process	1
regulation of chemokine activity	1.47	Biological Process	1
enteric nervous system development	1.47	Biological Process	1
Golgi vesicle docking	1.47	Biological Process	1
growth	1.47	Biological Process	1
membrane protein proteolysis	1.47	Biological Process	1
embryonic heart tube morphogenesis	1.47	Biological Process	1
positive regulation of RNA polymerase II transcriptional preinitiation complex assembly	1.47	Biological Process	1
cardiac muscle cell development	1.47	Biological Process	1
pectoral fin morphogenesis	1.47	Biological Process	1
epiboly involved in gastrulation with mouth forming second	1.47	Biological Process	1
pyridoxal 5'-phosphate salvage	1.47	Biological Process	1
taurine biosynthetic process	1.47	Biological Process	1
glycolytic process	1.47	Biological Process	1
cell fate commitment	1.47	Biological Process	1
positive regulation of cell-substrate adhesion	1.47	Biological Process	1
negative regulation of retinal cell programmed cell death	1.47	Biological Process	1
positive regulation of protein dephosphorylation	1.47	Biological Process	1
neurotransmitter transport	1.47	Biological Process	1
mitochondrion organization	1.47	Biological Process	1
peptide catabolic process	1.47	Biological Process	1
negative regulation of protein ubiquitination	1.47	Biological Process	1
TOR signaling	1.47	Biological Process	1
defense response to virus	1.47	Biological Process	1
regulation of vesicle fusion	1.47	Biological Process	1
osteoblast proliferation	1.47	Biological Process	1
positive regulation of glial cell proliferation	1.47	Biological Process	1
segmentation	1.47	Biological Process	1
negative regulation of focal adhesion assembly	1.47	Biological Process	1
positive regulation of receptor-mediated endocytosis	1.47	Biological Process	1
CTP biosynthetic process	1.47	Biological Process	1
transcription by RNA polymerase II	1.47	Biological Process	1
constitutive secretory pathway	1.47	Biological Process	1
exocyst localization	1.47	Biological Process	1
positive regulation of neurogenesis	1.47	Biological Process	1
regulation of GTPase activity	1.47	Biological Process	1
negative regulation of ossification	1.47	Biological Process	1
reproduction	1.47	Biological Process	1
retrograde axonal transport	1.47	Biological Process	1
apoptotic cell clearance	1.47	Biological Process	1
receptor recycling	1.47	Biological Process	1
digestive system development	1.47	Biological Process	1
retina layer formation	1.47	Biological Process	1
optic vesicle morphogenesis	1.47	Biological Process	1
NLS-bearing protein import into nucleus	1.47	Biological Process	1
negative regulation of canonical Wnt signaling pathway	1.47	Biological Process	1
endocardial cell development	1.47	Biological Process	1
heart formation	1.47	Biological Process	1
gluconeogenesis	1.47	Biological Process	1
G protein-coupled glutamate receptor signaling pathway	1.47	Biological Process	1
proteoglycan biosynthetic process	1.47	Biological Process	1
activation of protein kinase B activity	1.47	Biological Process	1
exocrine pancreas development	1.47	Biological Process	1
methylglyoxal catabolic process to D-lactate via S-lactoyl-glutathione	1.47	Biological Process	1
protein desumoylation	1.47	Biological Process	1
exit from mitosis	1.47	Biological Process	1
Schwann cell development	1.47	Biological Process	1
glucose homeostasis	1.47	Biological Process	1
cellular response to insulin stimulus	1.47	Biological Process	1
axonogenesis	1.47	Biological Process	1
opsin transport	1.47	Biological Process	1
neutrophil migration	1.47	Biological Process	1
regulation of microtubule-based process	1.47	Biological Process	1
ubiquitin-dependent protein catabolic process	1.47	Biological Process	1
photoreceptor cell outer segment organization	1.47	Biological Process	1
B cell receptor signaling pathway	1.47	Biological Process	1
regulated exocytosis	1.47	Biological Process	1
establishment of protein localization to membrane	1.47	Biological Process	1
protein targeting to ER	1.47	Biological Process	1
sulfate assimilation	1.47	Biological Process	1
collagen catabolic process	1.47	Biological Process	1
regulation of sprouting angiogenesis	1.47	Biological Process	1
neutrophil differentiation	1.47	Biological Process	1
semicircular canal fusion	1.47	Biological Process	1
phosphatidylserine metabolic process	1.47	Biological Process	1
regulation of cellular response to growth factor stimulus	1.47	Biological Process	1
extracellular matrix constituent secretion	1.47	Biological Process	1
insulin secretion involved in cellular response to glucose stimulus	1.47	Biological Process	1
oligodendrocyte differentiation	1.47	Biological Process	1
regulation of proteasomal ubiquitin-dependent protein catabolic process	1.47	Biological Process	1
pigment granule localization	1.47	Biological Process	1
regulation of sequestering of zinc ion	1.47	Biological Process	1
negative regulation of coagulation	1.47	Biological Process	1
glyceraldehyde-3-phosphate biosynthetic process	1.47	Biological Process	1
positive regulation of GTPase activity	1.47	Biological Process	1
purine nucleotide metabolic process	1.47	Biological Process	1
one-carbon metabolic process	1.47	Biological Process	1
thrombocyte differentiation	1.47	Biological Process	1
endodermal cell differentiation	1.47	Biological Process	1
L-cysteine catabolic process to pyruvate, using cysteine dioxygenase	1.47	Biological Process	1
olfactory bulb development	1.47	Biological Process	1
peptidyl-serine phosphorylation	1.47	Biological Process	1
germ cell development	1.47	Biological Process	1
myelination of anterior lateral line nerve axons	1.47	Biological Process	1
histone deacetylation	1.47	Biological Process	1
regulation of neurotransmitter secretion	1.47	Biological Process	1
negative regulation of cell migration	1.47	Biological Process	1
regulation of MAP kinase activity	1.47	Biological Process	1
optic nerve formation	1.47	Biological Process	1
peripheral nervous system neuron development	1.47	Biological Process	1
DNA replication, removal of RNA primer	1.47	Biological Process	1
fibroblast growth factor receptor signaling pathway involved in somitogenesis	1.47	Biological Process	1
sphingolipid metabolic process	1.47	Biological Process	1
ER-associated misfolded protein catabolic process	1.47	Biological Process	1
DNA replication, Okazaki fragment processing	1.47	Biological Process	1
regulation of planar cell polarity pathway involved in axis elongation	1.47	Biological Process	1
endocardium morphogenesis	1.47	Biological Process	1
glycerol catabolic process	1.47	Biological Process	1
Arp2/3 complex-mediated actin nucleation	1.47	Biological Process	1
smoothened signaling pathway	1.47	Biological Process	1
heart trabecula formation	1.47	Biological Process	1
protein catabolic process	1.47	Biological Process	1
learning	1.47	Biological Process	1
3'-phosphoadenosine 5'-phosphosulfate biosynthetic process	1.47	Biological Process	1
peripheral nervous system myelin formation	1.47	Biological Process	1
glutamine metabolic process	1.47	Biological Process	1
clustering of voltage-gated sodium channels	1.47	Biological Process	1
negative regulation of insulin receptor signaling pathway	1.47	Biological Process	1
integral component of membrane	90.91	Cellular Component	185
membrane	78.62	Cellular Component	160
nucleus	63.39	Cellular Component	129
cytoplasm	62.41	Cellular Component	127
plasma membrane	43.24	Cellular Component	88
integral component of plasma membrane	35.87	Cellular Component	73
extracellular exosome	31.94	Cellular Component	65
nucleoplasm	18.18	Cellular Component	37
cytosol	15.72	Cellular Component	32
Golgi apparatus	14.25	Cellular Component	29
endoplasmic reticulum	12.29	Cellular Component	25
endoplasmic reticulum membrane	10.32	Cellular Component	21
cytoskeleton	9.34	Cellular Component	19
mitochondrion	9.34	Cellular Component	19
Golgi membrane	8.85	Cellular Component	18
extracellular region	8.35	Cellular Component	17
intracellular	7.37	Cellular Component	15
focal adhesion	5.9	Cellular Component	12
cell surface	5.9	Cellular Component	12
nuclear chromatin	5.41	Cellular Component	11
cell projection	4.91	Cellular Component	10
endosome	4.91	Cellular Component	10
SWI/SNF complex	4.42	Cellular Component	9
transcriptional repressor complex	4.42	Cellular Component	9
lysosomal membrane	4.42	Cellular Component	9
extracellular matrix	4.42	Cellular Component	9
nBAF complex	4.42	Cellular Component	9
npBAF complex	4.42	Cellular Component	9
cell junction	4.42	Cellular Component	9
transcription factor complex	3.93	Cellular Component	8
cell cortex	3.93	Cellular Component	8
myosin complex	3.93	Cellular Component	8
neuron projection	3.93	Cellular Component	8
nucleolus	3.44	Cellular Component	7
extracellular space	3.44	Cellular Component	7
Z disc	3.44	Cellular Component	7
clathrin adaptor complex	3.44	Cellular Component	7
calcineurin complex	3.44	Cellular Component	7
microtubule	3.44	Cellular Component	7
integral component of Golgi membrane	3.44	Cellular Component	7
intercalated disc	2.95	Cellular Component	6
nuclear speck	2.95	Cellular Component	6
eukaryotic translation initiation factor 4F complex	2.95	Cellular Component	6
spliceosomal complex	2.95	Cellular Component	6
lamellipodium membrane	2.95	Cellular Component	6
polysome	2.95	Cellular Component	6
I band	2.95	Cellular Component	6
lysosome	2.95	Cellular Component	6
recycling endosome	2.46	Cellular Component	5
intracellular membrane-bounded organelle	2.46	Cellular Component	5
microtubule organizing center	2.46	Cellular Component	5
integral component of endoplasmic reticulum membrane	1.97	Cellular Component	4
perinuclear region of cytoplasm	1.97	Cellular Component	4
kinetochore	1.97	Cellular Component	4
phosphorylase kinase complex	1.97	Cellular Component	4
collagen trimer	1.97	Cellular Component	4
clathrin-coated pit	1.97	Cellular Component	4
ribosome	1.97	Cellular Component	4
cytoplasmic vesicle	1.97	Cellular Component	4
presynaptic active zone	1.97	Cellular Component	4
extrinsic component of cytoplasmic side of plasma membrane	1.97	Cellular Component	4
spectrin	1.47	Cellular Component	3
endoplasmic reticulum-Golgi intermediate compartment membrane	1.47	Cellular Component	3
integrin complex	1.47	Cellular Component	3
endosome membrane	1.47	Cellular Component	3
trans-Golgi network	1.47	Cellular Component	3
spindle microtubule	1.47	Cellular Component	3
axolemma	1.47	Cellular Component	3
M band	1.47	Cellular Component	3
early endosome	1.47	Cellular Component	3
kinesin complex	1.47	Cellular Component	3
centrosome	1.47	Cellular Component	3
cuticular plate	1.47	Cellular Component	3
actin cytoskeleton	1.47	Cellular Component	3
mitochondrial outer membrane	1.47	Cellular Component	3
postsynaptic membrane	0.98	Cellular Component	2
COPII-coated ER to Golgi transport vesicle	0.98	Cellular Component	2
semaphorin receptor complex	0.98	Cellular Component	2
cytoplasmic microtubule	0.98	Cellular Component	2
SPOTS complex	0.98	Cellular Component	2
CRD-mediated mRNA stability complex	0.98	Cellular Component	2
late endosome membrane	0.98	Cellular Component	2
chromosome	0.98	Cellular Component	2
nucleosome	0.98	Cellular Component	2
ruffle membrane	0.98	Cellular Component	2
synapse	0.98	Cellular Component	2
melanosome	0.98	Cellular Component	2
histone pre-mRNA 3'end processing complex	0.98	Cellular Component	2
dendrite	0.98	Cellular Component	2
eukaryotic translation initiation factor 3 complex	0.98	Cellular Component	2
lamellipodium	0.98	Cellular Component	2
mitochondrial inner membrane	0.98	Cellular Component	2
microtubule associated complex	0.98	Cellular Component	2
retromer complex	0.98	Cellular Component	2
catalytic step 2 spliceosome	0.98	Cellular Component	2
integral component of synaptic vesicle membrane	0.98	Cellular Component	2
late endosome	0.98	Cellular Component	2
AMPA glutamate receptor complex	0.98	Cellular Component	2
GAIT complex	0.98	Cellular Component	2
signal recognition particle, endoplasmic reticulum targeting	0.49	Cellular Component	1
membrane raft	0.49	Cellular Component	1
protein phosphatase type 2A complex	0.49	Cellular Component	1
trans-Golgi network transport vesicle	0.49	Cellular Component	1
nuclear proteasome complex	0.49	Cellular Component	1
phagocytic vesicle	0.49	Cellular Component	1
PML body	0.49	Cellular Component	1
sarcoplasmic reticulum	0.49	Cellular Component	1
sarcoplasmic reticulum lumen	0.49	Cellular Component	1
smooth endoplasmic reticulum membrane	0.49	Cellular Component	1
synaptic vesicle	0.49	Cellular Component	1
AP-2 adaptor complex	0.49	Cellular Component	1
mitochondrial ribosome	0.49	Cellular Component	1
cortical actin cytoskeleton	0.49	Cellular Component	1
respirasome	0.49	Cellular Component	1
histone acetyltransferase complex	0.49	Cellular Component	1
peroxisomal matrix	0.49	Cellular Component	1
integral component of cytoplasmic side of endoplasmic reticulum membrane	0.49	Cellular Component	1
mitochondrial matrix	0.49	Cellular Component	1
cAMP-dependent protein kinase complex	0.49	Cellular Component	1
virion	0.49	Cellular Component	1
anchored component of membrane	0.49	Cellular Component	1
Arp2/3 protein complex	0.49	Cellular Component	1
integral component of lumenal side of endoplasmic reticulum membrane	0.49	Cellular Component	1
ubiquitin ligase complex	0.49	Cellular Component	1
aggresome	0.49	Cellular Component	1
Golgi-associated vesicle membrane	0.49	Cellular Component	1
COPII vesicle coat	0.49	Cellular Component	1
mitotic spindle	0.49	Cellular Component	1
caveola	0.49	Cellular Component	1
bicellular tight junction	0.49	Cellular Component	1
heterotrimeric G-protein complex	0.49	Cellular Component	1
exocyst	0.49	Cellular Component	1
ciliary transition zone	0.49	Cellular Component	1
oligosaccharyltransferase complex	0.49	Cellular Component	1
cytosolic proteasome complex	0.49	Cellular Component	1
proteasome regulatory particle, base subcomplex	0.49	Cellular Component	1
condensed chromosome kinetochore	0.49	Cellular Component	1
chromosome, centromeric region	0.49	Cellular Component	1
cell leading edge	0.49	Cellular Component	1
gamma DNA polymerase complex	0.49	Cellular Component	1
nuclear pore	0.49	Cellular Component	1
filopodium	0.49	Cellular Component	1
Golgi stack	0.49	Cellular Component	1
proteasome regulatory particle, lid subcomplex	0.49	Cellular Component	1
secretory granule	0.49	Cellular Component	1
endoplasmic reticulum exit site	0.49	Cellular Component	1
proteasome complex	0.49	Cellular Component	1
recycling endosome membrane	0.49	Cellular Component	1
signal recognition particle	0.49	Cellular Component	1
endomembrane system	0.49	Cellular Component	1
viral nucleocapsid	0.49	Cellular Component	1
MLL1 complex	0.49	Cellular Component	1
terminal bouton	0.49	Cellular Component	1
nucleotide binding	81.57	Molecular Function	83
protein binding	79.61	Molecular Function	81
nucleic acid binding	73.71	Molecular Function	75
metal ion binding	71.74	Molecular Function	73
RNA binding	63.88	Molecular Function	65
ATP binding	52.09	Molecular Function	53
protein tyrosine phosphatase activity	46.19	Molecular Function	47
signaling receptor binding	46.19	Molecular Function	47
cell adhesion molecule binding	42.26	Molecular Function	43
transmembrane receptor protein tyrosine phosphatase activity	41.28	Molecular Function	42
DNA binding	37.35	Molecular Function	38
hydrolase activity	37.35	Molecular Function	38
transferase activity	36.36	Molecular Function	37
zinc ion binding	29.48	Molecular Function	30
calcium ion binding	27.52	Molecular Function	28
actin binding	23.59	Molecular Function	24
protein kinase activity	22.6	Molecular Function	23
kinase activity	22.6	Molecular Function	23
DNA-binding transcription factor activity	20.64	Molecular Function	21
mRNA binding	17.69	Molecular Function	18
protein heterodimerization activity	17.69	Molecular Function	18
GTPase activator activity	16.71	Molecular Function	17
sequence-specific DNA binding	14.74	Molecular Function	15
protein dimerization activity	14.74	Molecular Function	15
protein tyrosine kinase activity	12.78	Molecular Function	13
phospholipid binding	12.78	Molecular Function	13
DNA-binding transcription factor activity, RNA polymerase II-specific	12.78	Molecular Function	13
catalytic activity	11.79	Molecular Function	12
RNA polymerase II proximal promoter sequence-specific DNA binding	10.81	Molecular Function	11
GTP binding	10.81	Molecular Function	11
lipid binding	10.81	Molecular Function	11
transcription factor binding	10.81	Molecular Function	11
calmodulin binding	10.81	Molecular Function	11
peptidase activity	10.81	Molecular Function	11
phosphoric diester hydrolase activity	9.83	Molecular Function	10
transcription regulatory region sequence-specific DNA binding	9.83	Molecular Function	10
nuclear receptor binding	8.85	Molecular Function	9
metalloendopeptidase activity	8.85	Molecular Function	9
N-acetyltransferase activity	8.85	Molecular Function	9
nucleosomal DNA binding	8.85	Molecular Function	9
phosphatase activity	8.85	Molecular Function	9
protein N-terminus binding	8.85	Molecular Function	9
RNA polymerase II distal enhancer sequence-specific DNA binding	8.85	Molecular Function	9
ARF guanyl-nucleotide exchange factor activity	8.85	Molecular Function	9
ATPase activity	8.85	Molecular Function	9
guanyl-nucleotide exchange factor activity	8.85	Molecular Function	9
protein serine/threonine kinase activity	8.85	Molecular Function	9
motor activity	7.86	Molecular Function	8
ligase activity	7.86	Molecular Function	8
enzyme binding	7.86	Molecular Function	8
oxidoreductase activity	7.86	Molecular Function	8
ribosomal small subunit binding	7.86	Molecular Function	8
magnesium ion binding	7.86	Molecular Function	8
ubiquitin protein ligase activity	6.88	Molecular Function	7
L-amino acid transmembrane transporter activity	6.88	Molecular Function	7
methyltransferase activity	6.88	Molecular Function	7
ribosomal S6-glutamic acid ligase activity	6.88	Molecular Function	7
metallopeptidase activity	6.88	Molecular Function	7
protein-glycine ligase activity, initiating	6.88	Molecular Function	7
translation initiation factor activity	6.88	Molecular Function	7
UDP-N-acetylmuramoylalanyl-D-glutamyl-2,6-diaminopimelate-D-alanyl-D-alanine ligase activity	6.88	Molecular Function	7
protein-glycine ligase activity, elongating	6.88	Molecular Function	7
coenzyme F420-2 alpha-glutamyl ligase activity	6.88	Molecular Function	7
calmodulin-dependent protein phosphatase activity	6.88	Molecular Function	7
ephrin receptor activity	6.88	Molecular Function	7
protein-glutamic acid ligase activity	6.88	Molecular Function	7
G protein-coupled receptor activity	6.88	Molecular Function	7
microtubule binding	6.88	Molecular Function	7
calcium-dependent protein serine/threonine phosphatase activity	6.88	Molecular Function	7
coenzyme F420-0 gamma-glutamyl ligase activity	6.88	Molecular Function	7
ubiquitin-protein transferase activity	6.88	Molecular Function	7
drug binding	6.88	Molecular Function	7
protein serine/threonine phosphatase activity	6.88	Molecular Function	7
protein-glycine ligase activity	6.88	Molecular Function	7
non-membrane spanning protein tyrosine kinase activity	6.88	Molecular Function	7
protein homodimerization activity	6.88	Molecular Function	7
phosphoprotein phosphatase activity	6.88	Molecular Function	7
tubulin-glycine ligase activity	6.88	Molecular Function	7
tubulin-glutamic acid ligase activity	6.88	Molecular Function	7
RNA strand annealing activity	5.9	Molecular Function	6
protein binding, bridging	5.9	Molecular Function	6
Rho guanyl-nucleotide exchange factor activity	5.9	Molecular Function	6
pre-mRNA binding	5.9	Molecular Function	6
RNA strand-exchange activity	5.9	Molecular Function	6
RNA polymerase II regulatory region sequence-specific DNA binding	5.9	Molecular Function	6
transcription corepressor activity	5.9	Molecular Function	6
copper ion transmembrane transporter activity	5.9	Molecular Function	6
chromatin binding	5.9	Molecular Function	6
transferase activity, transferring glycosyl groups	5.9	Molecular Function	6
glycerophosphodiester phosphodiesterase activity	5.9	Molecular Function	6
serine-type endopeptidase activity	4.91	Molecular Function	5
phosphotransferase activity, alcohol group as acceptor	4.91	Molecular Function	5
starch binding	4.91	Molecular Function	5
isomerase activity	4.91	Molecular Function	5
carbohydrate binding	4.91	Molecular Function	5
glycerophosphocholine phosphodiesterase activity	4.91	Molecular Function	5
amyloid-beta binding	4.91	Molecular Function	5
glucosyltransferase activity	3.93	Molecular Function	4
alpha-1,2-galactosyltransferase activity	3.93	Molecular Function	4
signal sequence binding	3.93	Molecular Function	4
beta-1,4-mannosyltransferase activity	3.93	Molecular Function	4
1,2-dihydroxy-phenanthrene glycosyltransferase activity	3.93	Molecular Function	4
histone-lysine N-methyltransferase activity	3.93	Molecular Function	4
phosphorylase kinase activity	3.93	Molecular Function	4
Wnt-activated receptor activity	3.93	Molecular Function	4
ATPase-coupled phospholipid transporter activity	3.93	Molecular Function	4
dolichyl pyrophosphate Glc1Man9GlcNAc2 alpha-1,3-glucosyltransferase activity	3.93	Molecular Function	4
amino acid transmembrane transporter activity	3.93	Molecular Function	4
9-phenanthrol UDP-glucuronosyltransferase activity	3.93	Molecular Function	4
Wnt-protein binding	3.93	Molecular Function	4
dolichyl pyrophosphate Man9GlcNAc2 alpha-1,3-glucosyltransferase activity	3.93	Molecular Function	4
ion channel binding	3.93	Molecular Function	4
protein tyrosine/serine/threonine phosphatase activity	3.93	Molecular Function	4
p53 binding	3.93	Molecular Function	4
alpha-1,3-galactosyltransferase activity	3.93	Molecular Function	4
alpha-1,3-mannosyltransferase activity	3.93	Molecular Function	4
cysteine-type peptidase activity	3.93	Molecular Function	4
transcription regulatory region DNA binding	3.93	Molecular Function	4
acetylgalactosaminyltransferase activity	3.93	Molecular Function	4
pre-mRNA branch point binding	3.93	Molecular Function	4
dolichyl-pyrophosphate Man7GlcNAc2 alpha-1,6-mannosyltransferase activity	3.93	Molecular Function	4
galactosyltransferase activity	3.93	Molecular Function	4
salicylic acid glucosyltransferase (glucoside-forming) activity	3.93	Molecular Function	4
antiporter activity	3.93	Molecular Function	4
transporter activity	3.93	Molecular Function	4
alpha-1,2-mannosyltransferase activity	3.93	Molecular Function	4
identical protein binding	3.93	Molecular Function	4
lipopolysaccharide-1,5-galactosyltransferase activity	3.93	Molecular Function	4
O antigen polymerase activity	3.93	Molecular Function	4
9-phenanthrol glycosyltransferase activity	3.93	Molecular Function	4
phosphatidylinositol binding	3.93	Molecular Function	4
oligosaccharyl transferase activity	3.93	Molecular Function	4
histone methyltransferase activity (H3-K79 specific)	3.93	Molecular Function	4
GTPase binding	2.95	Molecular Function	3
structural constituent of cytoskeleton	2.95	Molecular Function	3
inositol phosphorylceramide phospholipase activity	2.95	Molecular Function	3
protein disulfide isomerase activity	2.95	Molecular Function	3
photoreceptor cyclic-nucleotide phosphodiesterase activity	2.95	Molecular Function	3
calmodulin-dependent cyclic-nucleotide phosphodiesterase activity	2.95	Molecular Function	3
cGMP-stimulated cyclic-nucleotide phosphodiesterase activity	2.95	Molecular Function	3
3',5'-cyclic-AMP phosphodiesterase activity	2.95	Molecular Function	3
mannosyl-inositol phosphorylceramide phospholipase activity	2.95	Molecular Function	3
calcium-dependent cysteine-type endopeptidase activity	2.95	Molecular Function	3
frizzled binding	2.95	Molecular Function	3
ubiquitin protein ligase binding	2.95	Molecular Function	3
zinc ion transmembrane transporter activity	2.95	Molecular Function	3
neutral amino acid transmembrane transporter activity	2.95	Molecular Function	3
cysteine-type endopeptidase inhibitor activity	2.95	Molecular Function	3
transmembrane transporter activity	2.95	Molecular Function	3
cGMP-inhibited cyclic-nucleotide phosphodiesterase activity	2.95	Molecular Function	3
3',5'-cyclic-nucleotide phosphodiesterase activity	2.95	Molecular Function	3
SUMO transferase activity	2.95	Molecular Function	3
Rab GTPase binding	2.95	Molecular Function	3
arginine transmembrane transporter activity	2.95	Molecular Function	3
GTPase activity	2.95	Molecular Function	3
SUMO polymer binding	2.95	Molecular Function	3
channel activity	2.95	Molecular Function	3
protein kinase inhibitor activity	2.95	Molecular Function	3
L-lysine transmembrane transporter activity	2.95	Molecular Function	3
mannosyl-diinositol phosphorylceramide phospholipase activity	2.95	Molecular Function	3
ion channel activity	2.95	Molecular Function	3
microtubule motor activity	2.95	Molecular Function	3
ankyrin binding	2.95	Molecular Function	3
actin filament binding	2.95	Molecular Function	3
cyclic-nucleotide phosphodiesterase activity	2.95	Molecular Function	3
epidermal growth factor receptor binding	2.95	Molecular Function	3
structural constituent of ribosome	2.95	Molecular Function	3
7,8-dihydro-D-neopterin 2',3'-cyclic phosphate phosphodiesterase activity	2.95	Molecular Function	3
mannose binding	2.95	Molecular Function	3
voltage-gated anion channel activity	2.95	Molecular Function	3
inositol phosphosphingolipid phospholipase activity	2.95	Molecular Function	3
tocotrienol omega-hydroxylase activity	1.97	Molecular Function	2
semaphorin receptor activity	1.97	Molecular Function	2
oxidoreductase activity, acting on paired donors, with incorporation or reduction of molecular oxygen, NAD(P)H as one donor, and incorporation of one atom of oxygen	1.97	Molecular Function	2
4-hydroxypyridine-3-hydroxylase activity	1.97	Molecular Function	2
2-octaprenyl-3-methyl-6-methoxy-1,4-benzoquinol hydroxylase activity	1.97	Molecular Function	2
heat shock protein binding	1.97	Molecular Function	2
3,5-xylenol methylhydroxylase activity	1.97	Molecular Function	2
toluene-4-sulfonate monooxygenase activity	1.97	Molecular Function	2
FAD binding	1.97	Molecular Function	2
cholesterol binding	1.97	Molecular Function	2
hyalurononglucosaminidase activity	1.97	Molecular Function	2
phosphatidylinositol-3,5-bisphosphate binding	1.97	Molecular Function	2
iron ion binding	1.97	Molecular Function	2
chlorophenol 4-monooxygenase activity	1.97	Molecular Function	2
toluene 4-monooxygenase activity	1.97	Molecular Function	2
integrin binding	1.97	Molecular Function	2
4-hydroxyphenylacetate,NADH:oxygen oxidoreductase (3-hydroxylating) activity	1.97	Molecular Function	2
iron-sulfur cluster binding	1.97	Molecular Function	2
hydrolase activity, acting on glycosyl bonds	1.97	Molecular Function	2
xylene monooxygenase activity	1.97	Molecular Function	2
neuropilin binding	1.97	Molecular Function	2
phenanthrene 1,2-monooxygenase activity	1.97	Molecular Function	2
2-oxo-delta3-4,5,5-trimethylcyclopentenylacetyl-CoA 1,2-monooxygenase activity	1.97	Molecular Function	2
toluene 2-monooxygenase activity	1.97	Molecular Function	2
1-methylnaphthalene hydroxylase activity	1.97	Molecular Function	2
peptidyl-proline 4-dioxygenase activity	1.97	Molecular Function	2
extracellularly glutamate-gated ion channel activity	1.97	Molecular Function	2
chemokine receptor activity	1.97	Molecular Function	2
enzyme activator activity	1.97	Molecular Function	2
unfolded protein binding	1.97	Molecular Function	2
carboxylic ester hydrolase activity	1.97	Molecular Function	2
phenanthrene 3,4-monooxygenase activity	1.97	Molecular Function	2
6-hydroxynicotinate 3-monooxygenase activity	1.97	Molecular Function	2
1-hydroxy-2-oxolimonene 1,2-monooxygenase activity	1.97	Molecular Function	2
ATPase-coupled cation transmembrane transporter activity	1.97	Molecular Function	2
phenylacetate hydroxylase activity	1.97	Molecular Function	2
styrene monooxygenase activity	1.97	Molecular Function	2
cation transmembrane transporter activity	1.97	Molecular Function	2
NAD binding	1.97	Molecular Function	2
ATPase-coupled transmembrane transporter activity	1.97	Molecular Function	2
aspartic-type endopeptidase activity	1.97	Molecular Function	2
oxidoreductase activity, acting on the CH-OH group of donors, NAD or NADP as acceptor	1.97	Molecular Function	2
tetrahydrofuran hydroxylase activity	1.97	Molecular Function	2
AMPA glutamate receptor activity	1.97	Molecular Function	2
toluene 3-monooxygenase activity	1.97	Molecular Function	2
insulin-like growth factor binding	1.97	Molecular Function	2
toluene-sulfonate methyl-monooxygenase activity	1.97	Molecular Function	2
monooxygenase activity	1.97	Molecular Function	2
UDP-N-acetylglucosamine diphosphorylase activity	1.97	Molecular Function	2
extracellular matrix structural constituent	1.97	Molecular Function	2
dimethyl sulfide monooxygenase activity	1.97	Molecular Function	2
fibronectin binding	1.97	Molecular Function	2
phenanthrene 9,10-monooxygenase activity	1.97	Molecular Function	2
thalianol hydroxylase activity	1.97	Molecular Function	2
histone-arginine N-methyltransferase activity	1.97	Molecular Function	2
2-hydroxy-phenylacetate hydroxylase activity	1.97	Molecular Function	2
poly(A) binding	1.97	Molecular Function	2
limonene monooxygenase activity	1.97	Molecular Function	2
FK506 binding	1.97	Molecular Function	2
oxidoreductase activity, acting on the aldehyde or oxo group of donors, NAD or NADP as acceptor	1.97	Molecular Function	2
carbon disulfide oxygenase activity	1.97	Molecular Function	2
1-hydroxy-2-naphthoate hydroxylase activity	1.97	Molecular Function	2
uridylyltransferase activity	1.97	Molecular Function	2
4-chlorobenzaldehyde oxidase activity	1.97	Molecular Function	2
arginine N-methyltransferase activity	1.97	Molecular Function	2
peptidyl-prolyl cis-trans isomerase activity	1.97	Molecular Function	2
syntaxin binding	1.97	Molecular Function	2
3-methyl-2-oxo-1,2-dihydroquinoline 6-monooxygenase activity	1.97	Molecular Function	2
semaphorin receptor binding	1.97	Molecular Function	2
6-hydroxy-3-methyl-2-oxo-1,2-dihydroquinoline 6-monooxygenase activity	1.97	Molecular Function	2
SH3 domain binding	1.97	Molecular Function	2
thiol-dependent ubiquitinyl hydrolase activity	1.97	Molecular Function	2
carboxy-lyase activity	1.97	Molecular Function	2
4-nitrophenol 4-monooxygenase activity	1.97	Molecular Function	2
adenosylmethionine decarboxylase activity	1.97	Molecular Function	2
collagen binding	1.97	Molecular Function	2
ionotropic glutamate receptor activity	1.97	Molecular Function	2
phospholipase activity	1.97	Molecular Function	2
2-methylnaphthalene hydroxylase activity	1.97	Molecular Function	2
3-(3-hydroxyphenyl)propionate hydroxylase activity	1.97	Molecular Function	2
branched-chain dodecylbenzene sulfonate monooxygenase activity	1.97	Molecular Function	2
alpha-pinene monooxygenase [NADH] activity	1.97	Molecular Function	2
lyase activity	1.97	Molecular Function	2
bisphenol A hydroxylase A activity	1.97	Molecular Function	2
3-HSA hydroxylase activity	1.97	Molecular Function	2
extracellular matrix binding	1.97	Molecular Function	2
dibenzothiophene monooxygenase activity	1.97	Molecular Function	2
S-adenosylmethionine-dependent methyltransferase activity	1.97	Molecular Function	2
chemorepellent activity	1.97	Molecular Function	2
isobutylamine N-hydroxylase activity	1.97	Molecular Function	2
protein-arginine omega-N asymmetric methyltransferase activity	1.97	Molecular Function	2
salicylate 5-hydroxylase activity	1.97	Molecular Function	2
dopamine binding	0.98	Molecular Function	1
electron transfer activity	0.98	Molecular Function	1
cytokine activity	0.98	Molecular Function	1
eukaryotic elongation factor-2 kinase regulator activity	0.98	Molecular Function	1
N6-(1,2-dicarboxyethyl)AMP AMP-lyase (fumarate-forming) activity	0.98	Molecular Function	1
phosphatidylinositol-3,4-bisphosphate 5-kinase activity	0.98	Molecular Function	1
metal ion transmembrane transporter activity	0.98	Molecular Function	1
inositol 5-diphosphate pentakisphosphate 5-kinase activity	0.98	Molecular Function	1
hydroxypyruvate reductase activity	0.98	Molecular Function	1
glycerate 2-kinase activity	0.98	Molecular Function	1
transaminase activity	0.98	Molecular Function	1
DNA-methyltransferase activity	0.98	Molecular Function	1
UFM1 transferase activity	0.98	Molecular Function	1
cyclin-dependent protein kinase activating kinase regulator activity	0.98	Molecular Function	1
ribosome binding	0.98	Molecular Function	1
cAMP binding	0.98	Molecular Function	1
amidophosphoribosyltransferase activity	0.98	Molecular Function	1
phosphocholine transferase activity	0.98	Molecular Function	1
thyroid hormone binding	0.98	Molecular Function	1
endopeptidase activity	0.98	Molecular Function	1
heptose 7-phosphate kinase activity	0.98	Molecular Function	1
heparan sulfate proteoglycan binding	0.98	Molecular Function	1
adenylylsulfate kinase activity	0.98	Molecular Function	1
site-specific endodeoxyribonuclease activity, specific for altered base	0.98	Molecular Function	1
hydroxymethyl-, formyl- and related transferase activity	0.98	Molecular Function	1
5'-flap endonuclease activity	0.98	Molecular Function	1
dopamine neurotransmitter receptor activity, coupled via Gs	0.98	Molecular Function	1
tubulin binding	0.98	Molecular Function	1
cysteine dioxygenase activity	0.98	Molecular Function	1
phosphofructokinase activity	0.98	Molecular Function	1
TBP-class protein binding	0.98	Molecular Function	1
isocitrate dehydrogenase (NADP+) activity	0.98	Molecular Function	1
geraniol kinase activity	0.98	Molecular Function	1
glyoxylate reductase (NADP) activity	0.98	Molecular Function	1
1-phosphatidylinositol-5-kinase activity	0.98	Molecular Function	1
hormone activity	0.98	Molecular Function	1
structural constituent of muscle	0.98	Molecular Function	1
nuclear localization sequence binding	0.98	Molecular Function	1
ATP-dependent RNA helicase activity	0.98	Molecular Function	1
beta-catenin binding	0.98	Molecular Function	1
single-stranded DNA binding	0.98	Molecular Function	1
7S RNA binding	0.98	Molecular Function	1
endoplasmic reticulum signal peptide binding	0.98	Molecular Function	1
pyridoxal kinase activity	0.98	Molecular Function	1
lipoprotein lipase activity	0.98	Molecular Function	1
histone acetyltransferase activity (H4-K5 specific)	0.98	Molecular Function	1
aminomethyltransferase activity	0.98	Molecular Function	1
formyltetrahydrofolate dehydrogenase activity	0.98	Molecular Function	1
cyclin-dependent protein serine/threonine kinase regulator activity	0.98	Molecular Function	1
2 iron, 2 sulfur cluster binding	0.98	Molecular Function	1
proteasome-activating ATPase activity	0.98	Molecular Function	1
histone deacetylase activity	0.98	Molecular Function	1
histone acetyltransferase activity (H4-K16 specific)	0.98	Molecular Function	1
cytidine kinase activity	0.98	Molecular Function	1
thiol-dependent ubiquitin-specific protease activity	0.98	Molecular Function	1
phosphatidylinositol phospholipase C activity	0.98	Molecular Function	1
inositol diphosphate tetrakisphosphate kinase activity	0.98	Molecular Function	1
oxidoreductase activity, acting on the CH-NH2 group of donors, oxygen as acceptor	0.98	Molecular Function	1
protein kinase B binding	0.98	Molecular Function	1
transmembrane signaling receptor activity	0.98	Molecular Function	1
NAD-dependent histone deacetylase activity (H3-K14 specific)	0.98	Molecular Function	1
inositol tetrakisphosphate 2-kinase activity	0.98	Molecular Function	1
transforming growth factor beta receptor binding	0.98	Molecular Function	1
SNARE binding	0.98	Molecular Function	1
CTP:geranylgeraniol kinase activity	0.98	Molecular Function	1
glutamate-5-semialdehyde dehydrogenase activity	0.98	Molecular Function	1
lysophospholipase activity	0.98	Molecular Function	1
PDZ domain binding	0.98	Molecular Function	1
ubiquitin conjugating enzyme binding	0.98	Molecular Function	1
heparin binding	0.98	Molecular Function	1
polynucleotide 5'-hydroxyl-kinase activity	0.98	Molecular Function	1
phenol kinase activity	0.98	Molecular Function	1
inositol-3,4,6-trisphosphate 1-kinase activity	0.98	Molecular Function	1
GTP-dependent polynucleotide kinase activity	0.98	Molecular Function	1
cAMP-dependent protein kinase regulator activity	0.98	Molecular Function	1
GTPase regulator activity	0.98	Molecular Function	1
glyoxalase III activity	0.98	Molecular Function	1
serine-type peptidase activity	0.98	Molecular Function	1
(S)-2-(5-amino-1-(5-phospho-D-ribosyl)imidazole-4-carboxamido)succinate AMP-lyase (fumarate-forming) activity	0.98	Molecular Function	1
heme binding	0.98	Molecular Function	1
glutamate 5-kinase activity	0.98	Molecular Function	1
dolichyl-diphosphooligosaccharide-protein glycotransferase activity	0.98	Molecular Function	1
prenol kinase activity	0.98	Molecular Function	1
GDP binding	0.98	Molecular Function	1
UDP-glucose:glycoprotein glucosyltransferase activity	0.98	Molecular Function	1
oxidoreductase activity, acting on diphenols and related substances as donors	0.98	Molecular Function	1
SH2 domain binding	0.98	Molecular Function	1
L-serine transmembrane transporter activity	0.98	Molecular Function	1
1-phosphatidylinositol-3-phosphate 4-kinase activity	0.98	Molecular Function	1
SUMO-specific protease activity	0.98	Molecular Function	1
aspartic endopeptidase activity, intramembrane cleaving	0.98	Molecular Function	1
ubiquinol-cytochrome-c reductase activity	0.98	Molecular Function	1
copper ion binding	0.98	Molecular Function	1
growth factor activity	0.98	Molecular Function	1
aminobutyraldehyde dehydrogenase activity	0.98	Molecular Function	1
single-stranded DNA-dependent ATPase activity	0.98	Molecular Function	1
protein tag	0.98	Molecular Function	1
geranylgeraniol kinase activity	0.98	Molecular Function	1
UDP-galactose:glucosylceramide beta-1,4-galactosyltransferase activity	0.98	Molecular Function	1
phosphatidylinositol bisphosphate kinase activity	0.98	Molecular Function	1
histone acetyltransferase activity (H4-K8 specific)	0.98	Molecular Function	1
mitogen-activated protein kinase kinase binding	0.98	Molecular Function	1
phosphatidylinositol 3-kinase activity	0.98	Molecular Function	1
CTP synthase activity	0.98	Molecular Function	1
phosphatidylinositol phosphate kinase activity	0.98	Molecular Function	1
phosphoserine:homoserine phosphotransferase activity	0.98	Molecular Function	1
L-seryl-tRNA(Sec) kinase activity	0.98	Molecular Function	1
farnesol kinase activity	0.98	Molecular Function	1
phytol kinase activity	0.98	Molecular Function	1
UDP-galactose transmembrane transporter activity	0.98	Molecular Function	1
transmembrane receptor protein tyrosine kinase activity	0.98	Molecular Function	1
microtubule plus-end binding	0.98	Molecular Function	1
double-stranded DNA binding	0.98	Molecular Function	1
4-trimethylammoniobutyraldehyde dehydrogenase activity	0.98	Molecular Function	1
cobinamide kinase activity	0.98	Molecular Function	1
(S)-lactate 2-kinase activity	0.98	Molecular Function	1
eukaryotic elongation factor-2 kinase activator activity	0.98	Molecular Function	1
myosin V binding	0.98	Molecular Function	1
cysteine-type endopeptidase activity	0.98	Molecular Function	1
LPPG:FO 2-phospho-L-lactate transferase activity	0.98	Molecular Function	1
cation channel activity	0.98	Molecular Function	1
triose-phosphate isomerase activity	0.98	Molecular Function	1
phosphorylase kinase regulator activity	0.98	Molecular Function	1
enhancer sequence-specific DNA binding	0.98	Molecular Function	1
GDP-dissociation inhibitor activity	0.98	Molecular Function	1
CTP:2-trans,-6-trans-farnesol kinase activity	0.98	Molecular Function	1
aminoglycoside phosphotransferase activity	0.98	Molecular Function	1
ATP-dependent polynucleotide kinase activity	0.98	Molecular Function	1
helicase activity	0.98	Molecular Function	1

## Sheet: Cluster 29
GO_term	Percent	Function	Count
protein phosphorylation	89.12	Biological Process	133
regulation of transcription, DNA-templated	80.41	Biological Process	120
phosphorylation	58.97	Biological Process	88
intracellular protein transport	46.24	Biological Process	69
signal transduction	42.22	Biological Process	63
transcription, DNA-templated	40.21	Biological Process	60
endocytosis	40.21	Biological Process	60
negative regulation of transcription by RNA polymerase II	37.53	Biological Process	56
intracellular signal transduction	36.18	Biological Process	54
transport	33.5	Biological Process	50
multicellular organism development	30.15	Biological Process	45
proteolysis	27.47	Biological Process	41
clathrin coat assembly	27.47	Biological Process	41
regulation of transcription by RNA polymerase II	26.8	Biological Process	40
cell adhesion	26.13	Biological Process	39
positive regulation of transcription by RNA polymerase II	26.13	Biological Process	39
oxidation-reduction process	26.13	Biological Process	39
response to yeast	25.46	Biological Process	38
protein ubiquitination	22.78	Biological Process	34
nervous system development	22.78	Biological Process	34
brain development	21.44	Biological Process	32
chemical synaptic transmission	21.44	Biological Process	32
actin filament organization	21.44	Biological Process	32
regulation of translation	20.1	Biological Process	30
regulation of Rho protein signal transduction	20.1	Biological Process	30
blood vessel development	20.1	Biological Process	30
positive regulation of GTPase activity	19.43	Biological Process	29
nucleosome assembly	18.76	Biological Process	28
gene silencing by RNA	18.09	Biological Process	27
positive regulation of transcription, DNA-templated	18.09	Biological Process	27
establishment or maintenance of epithelial cell apical/basal polarity	17.42	Biological Process	26
dorsal/ventral pattern formation	16.08	Biological Process	24
endothelial cell proliferation	16.08	Biological Process	24
chromosome segregation	16.08	Biological Process	24
receptor clustering	16.08	Biological Process	24
negative regulation of apoptotic process	15.41	Biological Process	23
negative regulation of intracellular estrogen receptor signaling pathway	15.41	Biological Process	23
transmembrane transport	15.41	Biological Process	23
developmental growth	14.74	Biological Process	22
cortical actin cytoskeleton organization	14.74	Biological Process	22
negative regulation of mitotic cell cycle	14.74	Biological Process	22
receptor localization to synapse	14.74	Biological Process	22
heterochromatin organization	14.74	Biological Process	22
positive regulation of cytoplasmic mRNA processing body assembly	14.07	Biological Process	21
negative regulation of retinoic acid receptor signaling pathway	13.4	Biological Process	20
negative regulation of translation	13.4	Biological Process	20
liver development	13.4	Biological Process	20
nuclear-transcribed mRNA catabolic process, deadenylation-dependent decay	13.4	Biological Process	20
cytoskeleton organization	13.4	Biological Process	20
positive regulation of nuclear-transcribed mRNA poly(A) tail shortening	13.4	Biological Process	20
small GTPase mediated signal transduction	13.4	Biological Process	20
negative regulation of transcription, DNA-templated	12.73	Biological Process	19
regulation of gene expression	12.73	Biological Process	19
microtubule cytoskeleton organization	12.06	Biological Process	18
fin regeneration	12.06	Biological Process	18
vesicle-mediated transport	12.06	Biological Process	18
chordate embryonic development	12.06	Biological Process	18
regulation of mitotic nuclear division	12.06	Biological Process	18
regulation of small GTPase mediated signal transduction	12.06	Biological Process	18
regulation of vesicle fusion	12.06	Biological Process	18
methylation	11.39	Biological Process	17
blastocyst development	11.39	Biological Process	17
protein transport	11.39	Biological Process	17
smoothened signaling pathway	11.39	Biological Process	17
negative regulation of Ras protein signal transduction	11.39	Biological Process	17
innate immune response	11.39	Biological Process	17
negative regulation of apoptotic signaling pathway	11.39	Biological Process	17
translational initiation	10.72	Biological Process	16
RNA processing	10.72	Biological Process	16
G protein-coupled receptor signaling pathway	10.72	Biological Process	16
metabolic process	10.72	Biological Process	16
cell differentiation	10.72	Biological Process	16
RNA secondary structure unwinding	10.72	Biological Process	16
establishment of mitotic spindle orientation	10.72	Biological Process	16
signal transduction by protein phosphorylation	10.72	Biological Process	16
regulation of JNK cascade	10.72	Biological Process	16
positive regulation of cell population proliferation	10.72	Biological Process	16
protein polyubiquitination	10.05	Biological Process	15
calcium-dependent cell-cell adhesion via plasma membrane cell adhesion molecules	10.05	Biological Process	15
apoptotic process	9.38	Biological Process	14
microtubule bundle formation	9.38	Biological Process	14
locomotion	9.38	Biological Process	14
angiogenesis	9.38	Biological Process	14
microvillus assembly	9.38	Biological Process	14
ion transport	9.38	Biological Process	14
positive regulation of transcription via serum response element binding	8.71	Biological Process	13
immune response	8.71	Biological Process	13
transcription by RNA polymerase II	8.71	Biological Process	13
positive regulation of microtubule polymerization	8.71	Biological Process	13
actin filament depolymerization	8.71	Biological Process	13
inner ear morphogenesis	8.71	Biological Process	13
post-anal tail morphogenesis	8.71	Biological Process	13
sulfur oxidation	8.71	Biological Process	13
cell migration	8.71	Biological Process	13
regulation of GTPase activity	8.71	Biological Process	13
regulation of ARF protein signal transduction	8.04	Biological Process	12
neural crest cell migration	8.04	Biological Process	12
chromatin remodeling	8.04	Biological Process	12
fibroblast growth factor receptor signaling pathway	8.04	Biological Process	12
microtubule nucleation	8.04	Biological Process	12
actin cytoskeleton organization	8.04	Biological Process	12
regulation of biosynthetic process	8.04	Biological Process	12
dephosphorylation	8.04	Biological Process	12
cell cycle	8.04	Biological Process	12
ear morphogenesis	8.04	Biological Process	12
homophilic cell adhesion via plasma membrane adhesion molecules	7.37	Biological Process	11
positive regulation of Notch signaling pathway	7.37	Biological Process	11
mRNA catabolic process	7.37	Biological Process	11
proteasome-mediated ubiquitin-dependent protein catabolic process	7.37	Biological Process	11
retrograde transport, endosome to Golgi	7.37	Biological Process	11
regulation of apoptotic process	7.37	Biological Process	11
regulation of clathrin-dependent endocytosis	7.37	Biological Process	11
mesoderm development	7.37	Biological Process	11
peptidyl-tyrosine phosphorylation	7.37	Biological Process	11
translation	7.37	Biological Process	11
eye development	7.37	Biological Process	11
regulation of cell shape	7.37	Biological Process	11
mRNA processing	6.7	Biological Process	10
cell volume homeostasis	6.7	Biological Process	10
retina vasculature development in camera-type eye	6.7	Biological Process	10
regulation of protein localization	6.7	Biological Process	10
positive regulation of Wnt signaling pathway	6.7	Biological Process	10
heterophilic cell-cell adhesion via plasma membrane cell adhesion molecules	6.7	Biological Process	10
purine nucleotide biosynthetic process	6.7	Biological Process	10
response to ethanol	6.7	Biological Process	10
positive regulation of phospholipase C activity	6.7	Biological Process	10
protein dephosphorylation	6.7	Biological Process	10
skin morphogenesis	6.7	Biological Process	10
cell surface receptor signaling pathway	6.7	Biological Process	10
olfactory nerve formation	6.7	Biological Process	10
olfactory placode morphogenesis	6.7	Biological Process	10
cardiac muscle tissue development	6.7	Biological Process	10
anatomical structure homeostasis	6.7	Biological Process	10
positive regulation of MAP kinase activity	6.7	Biological Process	10
posterior lateral line development	6.7	Biological Process	10
gastrulation	6.7	Biological Process	10
negative regulation of endodermal cell fate specification	6.7	Biological Process	10
negative regulation of ERK1 and ERK2 cascade	6.7	Biological Process	10
positive regulation of cell migration	6.03	Biological Process	9
[truncated: 1,879 more rows]
