# Supplementary material for: Effects of salinity acclimation on histological characteristics and miRNA expression profiles of scales in juvenile rainbow trout (Oncorhynchus mykiss)
Source: BMC Genomics. 2022 Apr 12;23:300. doi: 10.1186/s12864-022-08531-7 (PMC9006599; doi:10.1186/s12864-022-08531-7)
Supplement: Supplementary file 7 — Additional file 7: Table S7. Detailed information for the differentially enriched KEGG pathways. [file 12864_2022_8531_MOESM7_ESM.xlsx]

## Sheet: Cluster 16
pathway_id	pathway_name	Genes	S gene number	TS gene number	B gene number	TB gene number	pvalue
4010	MAPK signaling pathway	XM_021569391.1;XM_021620380.1;XM_021618197.1;XM_021618199.1;XM_021620936.1;XM_021600357.1;XM_021618204.1;XM_021624915.1;XM_021558977.1;XM_021566968.1;XM_021618201.1;XM_021618200.1;NM_001124232.1;XM_021558975.1;XM_021618205.1;XM_021558989.1;XM_021587397.1;XM_021621846.1;XM_021578200.1;XM_021569392.1;XM_021574269.1;XM_021620933.1;XM_021620930.1;XM_021574651.1;XM_021620934.1;XM_021618198.1;XM_021620…	49	460	754	14558	0
4140	Autophagy - animal	XM_021563179.1;XM_021602283.1;XM_021613170.1;XM_021588260.1;XM_021602290.1;XM_021602289.1;XM_021602284.1;XM_021588826.1;XM_021602287.1;XM_021602286.1;XM_021588261.1;XM_021602288.1	12	460	70	14558	0
5321	Inflammatory bowel disease (IBD)	XM_021576750.1;XM_021576745.1;XM_021576748.1;XM_021576746.1;NM_001195792.1;XM_021576749.1;XM_021576747.1	7	460	32	14558	0
4620	Toll-like receptor signaling pathway	XM_021581154.1;XM_021558975.1;XM_021558977.1;XM_021558976.1;XM_021581157.1;XM_021558978.1;XM_021581156.1;XM_021589089.1;XM_021558989.1;XM_021574651.1;XM_021581158.1;XM_021558979.1;XM_021581159.1;XM_021588999.1;NM_001124578.1;XM_021581155.1	16	460	170	14558	0
4621	NOD-like receptor signaling pathway	XM_021607036.1;XM_021612831.1;XM_021588999.1;XM_021558976.1;XM_021588448.1;XM_021558975.1;XM_021558977.1;XM_021558979.1;XM_021558989.1;XM_021607037.1;XM_021558978.1;XM_021613194.1;XM_021559426.1;XM_021607035.1;XM_021574651.1	15	460	170	14558	0
4360	Axon guidance	XM_021600251.1;XM_021600248.1;XM_021589203.1;XM_021564181.1;XM_021602400.1;XM_021609900.1;XM_021560420.1;XM_021600256.1;XM_021600253.1;XM_021560416.1;XM_021560417.1;XM_021598304.1;XM_021600250.1;XM_021560419.1;XM_021600247.1;XM_021602401.1;XM_021582383.1;XM_021600249.1;XM_021560415.1;XM_021560418.1;XM_021600254.1;XM_021600255.1	22	460	320	14558	0
5034	Alcoholism	XM_021582160.1;XM_021580730.1;XM_021609900.1;XM_021582162.1;XM_021580732.1;XM_021582161.1;XM_021580731.1;XM_021613149.1	8	460	63	14558	0
5220	Chronic myeloid leukemia	XM_021603699.1;XM_021602401.1;XM_021603701.1;XM_021602400.1;XM_021574542.1;XM_021603700.1	6	460	40	14558	0
4520	Adherens junction	XM_021566798.1;XM_021607118.1;XM_021590343.1;XM_021568645.1;XM_021590365.1;XM_021619467.1;XM_021615012.1;XM_021590328.1;XM_021557018.1;XM_021590357.1;XM_021568644.1;XM_021566802.1;XM_021590382.1;XM_021568642.1;XM_021590337.1;XM_021566800.1;XM_021590334.1;XM_021574651.1;XM_021568643.1;XM_021590371.1;XM_021566803.1;XM_021590389.1;XM_021568641.1;XM_021623455.1;XM_021587421.1;XM_021590350.1	26	460	437	14558	0
4150	mTOR signaling pathway	XM_021582967.1;XM_021602284.1;XM_021588261.1;XM_021588260.1;XM_021602288.1;XM_021575748.1;XM_021589089.1;XM_021602290.1;XM_021575749.1;XM_021602286.1;XM_021602289.1;XM_021582969.1;XM_021582968.1;XM_021602283.1;XM_021575750.1;XM_021602287.1	16	460	218	14558	0
4622	RIG-I-like receptor signaling pathway	XM_021557234.1;XM_021624832.1;XM_021561670.1;XM_021588999.1;XM_021597243.1;XM_021557233.1;XM_021597240.1;XM_021619166.1;XM_021597241.1;XM_021574651.1;XM_021597242.1	11	460	128	14558	0
910	Nitrogen metabolism	XM_021568509.1;XM_021592720.1;XM_021568500.1;XM_021592683.1	4	460	22	14558	0
630	Glyoxylate and dicarboxylate metabolism	XM_021578092.1;XM_021587911.1;XM_021606988.1;XM_021625137.1;XM_021606989.1;XM_021578093.1;XM_021609348.1	7	460	70	14558	0.01
4630	Jak-STAT signaling pathway	XM_021590371.1;XM_021590382.1;XM_021624535.1;XM_021590343.1;XM_021563365.1;XM_021590350.1;XM_021590357.1;XM_021590389.1;NM_001281392.1;XM_021567007.1;XM_021590328.1;XM_021600357.1;XM_021568423.1;XM_021590337.1;XM_021590365.1;XM_021590334.1;XM_021589089.1	17	460	276	14558	0.01
4921	Oxytocin signaling pathway	XM_021576011.1;XM_021576013.1;XM_021609900.1;XM_021576012.1;XM_021576010.1;XM_021576014.1;XM_021620627.1	7	460	71	14558	0.01
4672	Intestinal immune network for IgA production	XM_021624916.1;XM_021624914.1;XM_021624915.1;XM_021624913.1;XM_021624917.1	5	460	43	14558	0.01
920	Sulfur metabolism	XM_021581864.1;XM_021581865.1;XM_021581863.1	3	460	16	14558	0.01
4340	Hedgehog signaling pathway	XM_021581293.1;XM_021557757.1;XM_021581292.1;XM_021566958.1;XM_021615541.1;XM_021581296.1;XM_021581294.1;XM_021624892.1;XM_021581295.1	9	460	119	14558	0.01
1210	2-Oxocarboxylic acid metabolism	XM_021578092.1;XM_021578093.1;XM_021625137.1;XM_021565831.1	4	460	30	14558	0.01
20	Citrate cycle (TCA cycle)	XM_021618567.1;XM_021625137.1;XM_021578092.1;XM_021565831.1;XM_021578093.1	5	460	47	14558	0.02
330	Arginine and proline metabolism	XM_021602726.1;XM_021581863.1;XM_021581865.1;XM_021581864.1;XM_021602727.1	5	460	48	14558	0.02
4142	Lysosome	XM_021586629.1;XM_021567879.1;XM_021594242.1;XM_021586628.1;XM_021597946.1;XM_021607358.1;XM_021607361.1;XM_021561850.1;XM_021612141.1;XM_021585844.1;XM_021614675.1;XM_021613656.1;XM_021585843.1;XM_021617384.1	14	460	243	14558	0.02
270	Cysteine and methionine metabolism	XM_021566508.1;XM_021566506.1;XM_021566509.1;XM_021577544.1;XM_021577545.1;XM_021566507.1	6	460	71	14558	0.02
4920	Adipocytokine signaling pathway	XM_021567442.1;XM_021573627.1;XM_021567445.1;XM_021602541.1;XM_021567444.1;XM_021573624.1;XM_021573626.1;XM_021590263.1;XM_021602540.1;XM_021598925.1;XM_021567443.1	11	460	178	14558	0.03
620	Pyruvate metabolism	XM_021586874.1;XM_021586090.1;XM_021577544.1;XM_021618567.1;XM_021577545.1	5	460	54	14558	0.03
1200	Carbon metabolism	XM_021578093.1;XM_021578092.1;XM_021586874.1;XM_021586090.1;XM_021606988.1;XM_021587911.1;XM_021606989.1;XM_021625137.1;XM_021565831.1;XM_021618567.1;XM_021571265.1	11	460	182	14558	0.03
5231	Choline metabolism in cancer	XM_021625020.1;XM_021558128.1;XM_021573554.1;XM_021625021.1;XM_021558129.1	5	460	59	14558	0.04
4727	GABAergic synapse	XM_021568802.1;XM_021568806.1;XM_021609900.1;XM_021568803.1;XM_021568805.1;XM_021563935.1	6	460	81	14558	0.04
1230	Biosynthesis of amino acids	XM_021578093.1;XM_021618567.1;XM_021571265.1;XM_021586090.1;XM_021578092.1;XM_021625137.1;XM_021565831.1	7	460	103	14558	0.04
4512	ECM-receptor interaction	XM_021616598.1;XM_021589499.1;XM_021589500.1;XM_021590589.1;XM_021608384.1;XM_021622473.1;XM_021590591.1;XM_021583562.1;XM_021589501.1;XM_021612637.1;XM_021613432.1;XM_021612636.1	12	460	227	14558	0.06
5012	Parkinson disease	XM_021609799.1;XM_021609900.1;XM_021616599.1	3	460	28	14558	0.06
4014	Ras signaling pathway	XM_021612481.1;XM_021612483.1;XM_021598304.1;XM_021606043.1;XM_021612484.1;XM_021572479.1;XM_021612482.1;XM_021602401.1;XM_021622486.1;XM_021572478.1;XM_021602400.1	11	460	205	14558	0.06
4115	p53 signaling pathway	XM_021589266.1;XM_021575749.1;XM_021612564.1;XM_021575748.1;XM_021588999.1;XM_021601542.1;NM_001124692.1;XM_021575750.1;XM_021574806.1;XM_021612565.1	10	460	186	14558	0.07
230	Purine metabolism	XM_021575962.1;XM_021575995.1;XM_021575980.1;XM_021571265.1;XM_021558978.1;XM_021575988.1;XM_021576004.1;XM_021575972.1;XM_021558975.1;XM_021558977.1;XM_021574171.1;XM_021558979.1;XM_021558976.1;XM_021558989.1;XM_021586090.1	15	460	317	14558	0.08
4916	Melanogenesis	XM_021624892.1;XM_021576707.1;XM_021566958.1;XM_021609900.1;XM_021619467.1;XM_021591194.1;XM_021600357.1;XM_021557757.1;XM_021615541.1	9	460	172	14558	0.1
61	Fatty acid biosynthesis	XM_021573627.1;XM_021573626.1;XM_021573624.1	3	460	35	14558	0.1
4024	cAMP signaling pathway	XM_021558836.1;XM_021558837.1;XM_021609900.1;NM_001124270.1;XM_021558835.1	5	460	79	14558	0.1
4130	SNARE interactions in vesicular transport	XM_021573871.1;XM_021576074.1;XM_021573872.1;XM_021576073.1	4	460	57	14558	0.11
4152	AMPK signaling pathway	XM_021576012.1;XM_021576011.1;XM_021576010.1;XM_021576013.1;XM_021576014.1	5	460	80	14558	0.11
220	Arginine biosynthesis	XM_021581863.1;XM_021581865.1;XM_021581864.1	3	460	38	14558	0.12
4745	Phototransduction - fly	XM_021602499.1	1	460	4	14558	0.12
5131	Shigellosis	XM_021591449.1	1	460	4	14558	0.12
5164	Influenza A	XM_021581158.1;XM_021581155.1;XM_021581159.1;XM_021619166.1;XM_021581154.1;XM_021581157.1;XM_021581156.1	7	460	135	14558	0.14
4710	Circadian rhythm	XM_021569175.1;XM_021609470.1	2	460	21	14558	0.14
4330	Notch signaling pathway	XM_021569150.1;XM_021569151.1;XM_021569153.1;XM_021599036.1;XM_021569155.1;XM_021600131.1;XM_021569154.1;XM_021599037.1;XM_021569149.1;XM_021569152.1	10	460	217	14558	0.15
4730	Long-term depression	XM_021609900.1;NM_001165083.1	2	460	23	14558	0.16
5120	Epithelial cell signaling in Helicobacter pylori infection	XM_021605445.1	1	460	6	14558	0.18
4071	Sphingolipid signaling pathway	XM_021609900.1;NM_001165083.1	2	460	27	14558	0.21
4380	Osteoclast differentiation	XM_021584323.1;XM_021584322.1	2	460	27	14558	0.21
5010	Alzheimer disease	XM_021598648.1;XM_021606373.1;XM_021606374.1;XM_021589203.1	4	460	76	14558	0.22
3320	PPAR signaling pathway	XM_021602541.1;XM_021573627.1;XM_021598925.1;XM_021590263.1;XM_021573624.1;XM_021602540.1;XM_021573626.1	7	460	160	14558	0.24
71	Fatty acid degradation	XM_021573626.1;XM_021573627.1;XM_021573624.1	3	460	54	14558	0.24
640	Propanoate metabolism	XM_021577544.1;XM_021577545.1	2	460	30	14558	0.24
5322	Systemic lupus erythematosus	XM_021582161.1;XM_021582160.1;XM_021582162.1	3	460	57	14558	0.27
4540	Gap junction	XM_021581295.1;XM_021574562.1;XM_021600357.1;XM_021581293.1;XM_021581296.1;XM_021581294.1;XM_021610099.1;XM_021609900.1;XM_021581292.1	9	460	223	14558	0.27
514	Other types of O-glycan biosynthesis	XM_021608966.1;XM_021564014.1;XM_021564013.1;XM_021564011.1	4	460	84	14558	0.27
5020	Prion diseases	XM_021559171.1	1	460	10	14558	0.27
4260	Cardiac muscle contraction	XM_021612157.1;XM_021612156.1;XM_021570016.1;XM_021572211.1;XM_021572209.1	5	460	115	14558	0.3
5323	Rheumatoid arthritis	XM_021606043.1	1	460	12	14558	0.32
4722	Neurotrophin signaling pathway	XM_021602401.1;XM_021602400.1	2	460	37	14558	0.33
10	Glycolysis / Gluconeogenesis	XM_021586090.1;XM_021577544.1;XM_021577545.1	3	460	64	14558	0.33
591	Linoleic acid metabolism	XM_021586981.1	1	460	13	14558	0.34
3008	Ribosome biogenesis in eukaryotes	XM_021573590.1;XM_021573598.1;XM_021573605.1	3	460	66	14558	0.35
240	Pyrimidine metabolism	XM_021558975.1;XM_021558979.1;XM_021558989.1;XM_021558977.1;XM_021558976.1;XM_021558978.1	6	460	152	14558	0.35
5030	Cocaine addiction	XM_021609900.1;XM_021589203.1	2	460	43	14558	0.4
4015	Rap1 signaling pathway	XM_021572479.1;XM_021566187.1;XM_021598304.1;XM_021606043.1;XM_021572478.1;XM_021587574.1;XM_021609900.1	7	460	192	14558	0.4
510	N-Glycan biosynthesis	XM_021619132.1;XM_021608966.1;XM_021577586.1;XM_021622479.1	4	460	106	14558	0.43
5132	Salmonella infection	XM_021623455.1;XM_021587421.1;XM_021606101.1;XM_021606128.1;XM_021606110.1;XM_021606120.1	6	460	169	14558	0.44
790	Folate biosynthesis	XM_021590971.1	1	460	19	14558	0.46
4923	Regulation of lipolysis in adipocytes	XM_021609900.1	1	460	20	14558	0.47
4933	AGE-RAGE signaling pathway in diabetic complications	XM_021623455.1;XM_021567007.1;XM_021563365.1;XM_021587421.1;XM_021562259.1;XM_021608384.1;XM_021600357.1;XM_021589089.1	8	460	238	14558	0.48
500	Starch and sucrose metabolism	XM_021617384.1;XM_021578210.1	2	460	51	14558	0.48
3410	Base excision repair	XM_021579366.1;XM_021579367.1	2	460	51	14558	0.48
5142	Chagas disease (American trypanosomiasis)	XM_021609900.1	1	460	21	14558	0.49
5134	Legionellosis	XM_021603074.1;XM_021603083.1	2	460	52	14558	0.49
860	Porphyrin and chlorophyll metabolism	XM_021617384.1	1	460	22	14558	0.51
4974	Protein digestion and absorption	XM_021563935.1;XM_021576468.1;XM_021576469.1;XM_021576471.1	4	460	117	14558	0.51
5200	Pathways in cancer	NM_001165083.1;XM_021602400.1;XM_021603699.1;XM_021609900.1;XM_021603700.1;XM_021602401.1;XM_021603701.1;XM_021574542.1	8	460	246	14558	0.52
4924	Renin secretion	XM_021609900.1	1	460	23	14558	0.52
5221	Acute myeloid leukemia	XM_021574542.1	1	460	23	14558	0.52
1212	Fatty acid metabolism	XM_021573627.1;XM_021573624.1;XM_021573626.1	3	460	89	14558	0.54
3050	Proteasome	XM_021620057.1	1	460	24	14558	0.54
3010	Ribosome	XM_021567437.1;XM_021572455.1	2	460	58	14558	0.55
5168	Herpes simplex virus 1 infection	XM_021574651.1;XM_021558978.1;XM_021558989.1;NM_001124443.1;XM_021558979.1;NM_001124578.1;XM_021588999.1;NM_001124692.1;XM_021558975.1;XM_021558977.1;XM_021557018.1;XM_021558976.1	12	460	383	14558	0.55
5133	Pertussis	XM_021609900.1	1	460	26	14558	0.57
40	Pentose and glucuronate interconversions	XM_021617384.1	1	460	26	14558	0.57
5416	Viral myocarditis	XM_021602400.1;XM_021602401.1	2	460	63	14558	0.6
4930	Type II diabetes mellitus	XM_021565917.1;XM_021565918.1	2	460	64	14558	0.6
5146	Amoebiasis	NM_001124234.1	1	460	29	14558	0.61
4022	cGMP-PKG signaling pathway	XM_021609900.1;NM_001165083.1	2	460	66	14558	0.62
4611	Platelet activation	XM_021609900.1;NM_001165083.1	2	460	67	14558	0.63
4610	Complement and coagulation cascades	XM_021570594.1;XM_021587537.1	2	460	68	14558	0.64
5206	MicroRNAs in cancer	XM_021609134.1;XM_021602400.1;XM_021602401.1;XM_021609458.1	4	460	139	14558	0.64
4270	Vascular smooth muscle contraction	XM_021609986.1;XM_021607072.1;XM_021567384.1;XM_021607073.1;XM_021607071.1;NM_001165083.1;XM_021591194.1	7	460	245	14558	0.66
970	Aminoacyl-tRNA biosynthesis	XM_021586531.1	1	460	34	14558	0.66
5202	Transcriptional misregulation in cancer	XM_021610667.1;XM_021582059.1;XM_021582160.1;XM_021574542.1;XM_021606043.1;XM_021565917.1;XM_021582161.1;XM_021565918.1;XM_021582162.1;XM_021563320.1	10	460	350	14558	0.67
260	Glycine, serine and threonine metabolism	XM_021609348.1	1	460	35	14558	0.68
5145	Toxoplasmosis	XM_021609900.1	1	460	35	14558	0.68
4510	Focal adhesion	XM_021607072.1;XM_021589089.1;XM_021575749.1;XM_021587421.1;XM_021607073.1;XM_021613432.1;XM_021600357.1;XM_021590589.1;XM_021575748.1;XM_021607071.1;XM_021608384.1;XM_021606043.1;XM_021589500.1;XM_021575750.1;XM_021589501.1;XM_021589499.1;XM_021590591.1;XM_021623455.1	18	460	619	14558	0.68
4912	GnRH signaling pathway	XM_021600357.1;XM_021583392.1;XM_021591194.1;XM_021623455.1;XM_021587421.1	5	460	180	14558	0.68
4724	Glutamatergic synapse	XM_021563935.1;XM_021609900.1	2	460	74	14558	0.68
4370	VEGF signaling pathway	XM_021589089.1;XM_021599739.1;XM_021600357.1;XM_021587421.1;XM_021623455.1	5	460	185	14558	0.7
4072	Phospholipase D signaling pathway	NM_001165083.1	1	460	38	14558	0.71
4713	Circadian entrainment	XM_021609900.1	1	460	38	14558	0.71
5166	Human T-cell leukemia virus 1 infection	XM_021612313.1;XM_021587455.1;XM_021564181.1;XM_021581976.1	4	460	151	14558	0.71
4740	Olfactory transduction	XM_021598628.1;XM_021569994.1	2	460	80	14558	0.72
4931	Insulin resistance	XM_021575749.1;XM_021568644.1;XM_021568643.1;XM_021575748.1;XM_021568645.1;XM_021575750.1;XM_021578210.1;XM_021612662.1;XM_021598925.1;XM_021589089.1;XM_021568642.1;XM_021568641.1	12	460	435	14558	0.73
4725	Cholinergic synapse	XM_021609900.1	1	460	41	14558	0.73
531	Glycosaminoglycan degradation	XM_021617384.1	1	460	41	14558	0.73
4670	Leukocyte transendothelial migration	XM_021609900.1	1	460	41	14558	0.73
590	Arachidonic acid metabolism	XM_021586981.1;XM_021599739.1	2	460	82	14558	0.74
5203	Viral carcinogenesis	XM_021570917.1;XM_021570929.1;XM_021570908.1;XM_021570925.1	4	460	158	14558	0.74
4391	Hippo signaling pathway - fly	XM_021561005.1;XM_021563134.1;XM_021563133.1	3	460	121	14558	0.74
4971	Gastric acid secretion	XM_021609900.1	1	460	42	14558	0.74
562	Inositol phosphate metabolism	XM_021610178.1;XM_021575749.1;XM_021575748.1;XM_021610177.1;XM_021575750.1	5	460	195	14558	0.74
4911	Insulin secretion	XM_021565918.1;XM_021565917.1	2	460	84	14558	0.75
600	Sphingolipid metabolism	XM_021573700.1;XM_021571642.1	2	460	84	14558	0.75
980	Metabolism of xenobiotics by cytochrome P450	NM_001124742.1	1	460	43	14558	0.75
4744	Phototransduction	XM_021591194.1	1	460	43	14558	0.75
4066	HIF-1 signaling pathway	XM_021606043.1	1	460	43	14558	0.75
30	Pentose phosphate pathway	XM_021571265.1	1	460	44	14558	0.76
4145	Phagosome	XM_021597946.1;NM_001195412.1;XM_021610099.1;XM_021581865.1;XM_021581863.1;XM_021571353.1;XM_021581864.1	7	460	273	14558	0.76
5205	Proteoglycans in cancer	XM_021604003.1;XM_021576949.1;XM_021576948.1	3	460	127	14558	0.77
4144	Endocytosis	XM_021564108.1;XM_021567931.1;XM_021607072.1;XM_021609272.1;XM_021567930.1;XM_021569225.1;XM_021567929.1;XM_021606043.1;XM_021564576.1;XM_021605182.1;XM_021619796.1;XM_021607067.1;XM_021611977.1;XM_021611974.1;NM_001165070.1;XM_021607073.1;NM_001124232.1;XM_021623455.1;XM_021587421.1;XM_021595483.1;XM_021607071.1;XM_021568292.1;XM_021600357.1;XM_021622777.1;XM_021611975.1	25	460	897	14558	0.77
4064	NF-kappa B signaling pathway	XM_021619166.1	1	460	46	14558	0.77
4925	Aldosterone synthesis and secretion	XM_021620627.1	1	460	46	14558	0.77
983	Drug metabolism - other enzymes	XM_021617384.1	1	460	46	14558	0.77
4068	FoxO signaling pathway	XM_021575750.1;XM_021591051.1;XM_021575748.1;XM_021600357.1;XM_021601542.1;XM_021589089.1;XM_021569876.1;XM_021569875.1;XM_021569877.1;XM_021575749.1;NM_001124565.1	11	460	418	14558	0.77
4214	Apoptosis - fly	XM_021624281.1	1	460	47	14558	0.78
4060	Cytokine-cytokine receptor interaction	XM_021606043.1;NM_001124565.1;NM_001281392.1;XM_021576707.1;XM_021625607.1;XM_021624535.1	6	460	243	14558	0.78
4915	Estrogen signaling pathway	XM_021609900.1	1	460	48	14558	0.79
5100	Bacterial invasion of epithelial cells	XM_021584218.1	1	460	48	14558	0.79
5032	Morphine addiction	XM_021609900.1	1	460	48	14558	0.79
4012	ErbB signaling pathway	XM_021568423.1;XM_021600357.1;XM_021583392.1;XM_021602400.1;XM_021602401.1;XM_021589089.1	6	460	246	14558	0.79
4310	Wnt signaling pathway	XM_021574651.1;XM_021624892.1;XM_021566958.1;XM_021599037.1;NM_001124692.1;XM_021599036.1;XM_021615541.1;XM_021619467.1;XM_021557757.1;XM_021568423.1	10	460	393	14558	0.8
4146	Peroxisome	XM_021591228.1;XM_021573624.1;XM_021573627.1;XM_021573626.1	4	460	177	14558	0.81
520	Amino sugar and nucleotide sugar metabolism	XM_021574154.1	1	460	53	14558	0.82
533	Glycosaminoglycan biosynthesis - keratan sulfate	XM_021608966.1	1	460	53	14558	0.82
3018	RNA degradation	XM_021568732.1;XM_021617623.1;XM_021560126.1;XM_021610395.1;XM_021561204.1	5	460	219	14558	0.83
4070	Phosphatidylinositol signaling system	XM_021591194.1;XM_021610177.1;XM_021575750.1;XM_021575748.1;XM_021610178.1;XM_021575749.1;XM_021589089.1	7	460	295	14558	0.83
4062	Chemokine signaling pathway	XM_021609900.1	1	460	55	14558	0.83
4910	Insulin signaling pathway	XM_021591194.1;XM_021568643.1;XM_021568645.1;XM_021600357.1;XM_021589089.1;XM_021568644.1;XM_021578210.1;XM_021603966.1;XM_021568642.1;XM_021568641.1	10	460	406	14558	0.83
4922	Glucagon signaling pathway	XM_021598465.1	1	460	57	14558	0.84
2010	ABC transporters	XM_021589203.1	1	460	57	14558	0.84
4514	Cell adhesion molecules (CAMs)	XM_021568642.1;XM_021625295.1;XM_021568643.1;XM_021568644.1;XM_021568645.1;XM_021624901.1;XM_021600686.1;XM_021582505.1;XM_021625287.1;XM_021568641.1;XM_021624911.1;XM_021591140.1;XM_021607118.1;XM_021557018.1	14	460	559	14558	0.85
4530	Tight junction	XM_021563134.1;XM_021587421.1;XM_021609900.1;XM_021591140.1;XM_021582505.1;XM_021575749.1;XM_021623455.1;XM_021575748.1;XM_021600357.1;XM_021563133.1;XM_021604902.1;XM_021575750.1	12	460	488	14558	0.85
4151	PI3K-Akt signaling pathway	XM_021606043.1;XM_021598304.1	2	460	106	14558	0.85
4950	Maturity onset diabetes of the young	XM_021599097.1;XM_021565917.1;XM_021565918.1	3	460	149	14558	0.85
250	Alanine, aspartate and glutamate metabolism	XM_021572337.1	1	460	61	14558	0.86
4623	Cytosolic DNA-sensing pathway	XM_021557211.1	1	460	61	14558	0.86
4261	Adrenergic signaling in cardiomyocytes	XM_021589089.1;XM_021591194.1;XM_021572211.1;XM_021572209.1;XM_021609900.1;XM_021612156.1;XM_021612157.1;XM_021570016.1	8	460	348	14558	0.86
3022	Basal transcription factors	XM_021586940.1	1	460	63	14558	0.87
4726	Serotonergic synapse	XM_021609900.1	1	460	65	14558	0.88
4723	Retrograde endocannabinoid signaling	XM_021609900.1	1	460	68	14558	0.89
4728	Dopaminergic synapse	XM_021609900.1	1	460	88	14558	0.94
4810	Regulation of actin cytoskeleton	XM_021589865.1;XM_021623455.1;XM_021612157.1;XM_021608384.1;XM_021607072.1;XM_021593573.1;XM_021589089.1;XM_021612156.1;NM_001165083.1;XM_021593569.1;XM_021607071.1;XM_021607073.1;XM_021600357.1;XM_021587421.1	14	460	648	14558	0.95
4020	Calcium signaling pathway	XM_021607073.1;XM_021607071.1;XM_021559964.1;XM_021607072.1;XM_021622864.1;XM_021591194.1;XM_021622865.1	7	460	381	14558	0.96
4120	Ubiquitin mediated proteolysis	XM_021591449.1;XM_021575386.1;XM_021598020.1;XM_021590806.1;XM_021616231.1;XM_021616233.1;XM_021616232.1	7	460	381	14558	0.96
4110	Cell cycle	XM_021602400.1;NM_001124692.1;XM_021602401.1;XM_021568423.1	4	460	255	14558	0.96
3040	Spliceosome	XM_021619452.1;XM_021619453.1;NM_001124232.1;XM_021619454.1	4	460	258	14558	0.97
561	Glycerolipid metabolism	XM_021609348.1	1	460	106	14558	0.97
4141	Protein processing in endoplasmic reticulum	XM_021619132.1;NM_001124232.1;XM_021586978.1;XM_021590806.1;XM_021591449.1;XM_021567785.1;XM_021575386.1	7	460	407	14558	0.98
5412	Arrhythmogenic right ventricular cardiomyopathy (ARVC)	XM_021576998.1	1	460	121	14558	0.98
4390	Hippo signaling pathway	XM_021598169.1;XM_021586995.1	2	460	182	14558	0.98
564	Glycerophospholipid metabolism	XM_021589487.1;XM_021589496.1	2	460	190	14558	0.98
603	Glycosphingolipid biosynthesis - globo and isoglobo series	XM_021612141.1	1	460	130	14558	0.98
4914	Progesterone-mediated oocyte maturation	XM_021609900.1;XM_021589089.1	2	460	202	14558	0.99
4350	TGF-beta signaling pathway	XM_021568423.1;XM_021568032.1	2	460	220	14558	0.99
3013	RNA transport	XM_021577584.1;XM_021577585.1;XM_021620341.1;XM_021571368.1	4	460	341	14558	1
601	Glycosphingolipid biosynthesis - lacto and neolacto series	XM_021608966.1	1	460	193	14558	1
4320	Dorso-ventral axis formation	XM_021617900.1;XM_021617901.1	2	460	272	14558	1
4114	Oocyte meiosis	XM_021591194.1	1	460	215	14558	1
4550	Signaling pathways regulating pluripotency of stem cells	XM_021590168.1	1	460	217	14558	1
4080	Neuroactive ligand-receptor interaction	XM_021626046.1;XM_021626047.1;XM_021576582.1;XM_021602045.1	4	460	488	14558	1

## Sheet: Cluster 17
pathway_id	pathway_name	Genes	S gene number	TS gene number	B gene number	TB gene number	pvalue
5222	Small cell lung cancer	XM_021578159.1;XM_021578158.1;XM_021565908.1;XM_021565905.1;XM_021565906.1;XM_021565910.1;XM_021565904.1;XM_021565909.1;XM_021565913.1;XM_021565903.1;XM_021565912.1;XM_021565911.1;XM_021616543.1	13	704	43	14558	6.74605e-08
380	Tryptophan metabolism	XM_021588782.1;XM_021588778.1;XM_021588784.1;XM_021588783.1;XM_021588781.1;XM_021625189.1;XM_021604554.1;XM_021557955.1;XM_021625188.1;XM_021557954.1;XM_021625190.1;XM_021588779.1;XM_021557953.1;XM_021588777.1;XM_021557350.1	15	704	62	14558	1.77519e-07
562	Inositol phosphate metabolism	XM_021605649.1;XM_021614639.1;XM_021605701.1;XM_021605699.1;XM_021564825.1;XM_021605645.1;XM_021581935.1;XM_021605643.1;XM_021564824.1;XM_021605650.1;XM_021605648.1;XM_021605697.1;XM_021605647.1;XM_021574295.1;XM_021605700.1;XM_021605696.1;XM_021575289.1;XM_021624405.1;XM_021564828.1;XM_021574296.1;XM_021594161.1;XM_021564826.1;XM_021564821.1;XM_021605646.1;XM_021601206.1;XM_021564823.1;XM_021581…	28	704	195	14558	2.28861e-07
860	Porphyrin and chlorophyll metabolism	XM_021585697.1;XM_021585699.1;XM_021585698.1;XM_021613381.1;XM_021576252.1;XM_021613382.1;XM_021581932.1;XM_021581930.1;XM_021581931.1	9	704	22	14558	3.87481e-07
5220	Chronic myeloid leukemia	XM_021625729.1;XM_021616543.1;XM_021625720.1;XM_021618041.1;XM_021589342.1;XM_021589341.1;XM_021625713.1;XM_021589340.1;XM_021589343.1	9	704	40	14558	9.72955e-05
640	Propanoate metabolism	XM_021618451.1;XM_021579491.1;XM_021563871.1;XM_021579490.1;XM_021562836.1;XM_021563873.1;XM_021615715.1	7	704	30	14558	0.000460481
5223	Non-small cell lung cancer	XM_021565909.1;XM_021565912.1;XM_021565908.1;XM_021565910.1;XM_021565903.1;XM_021565906.1;XM_021565904.1;XM_021565905.1;XM_021565913.1;XM_021565911.1	10	704	62	14558	0.000720798
4120	Ubiquitin mediated proteolysis	XM_021601623.1;XM_021608765.1;XM_021616637.1;XM_021624239.1;XM_021624240.1;XM_021608776.1;XM_021568484.1;XM_021608792.1;XM_021568480.1;XM_021569441.1;XM_021621563.1;XM_021619392.1;XM_021616638.1;XM_021619387.1;XM_021569450.1;XM_021608783.1;XM_021568482.1;XM_021619389.1;XM_021619388.1;XM_021622182.1;XM_021616636.1;XM_021568483.1;XM_021619391.1;XM_021581913.1;XM_021619390.1;XM_021591764.1;XM_021624…	33	704	381	14558	0.00087695
310	Lysine degradation	XM_021565869.1;XM_021591722.1;XM_021591730.1;XM_021617160.1;XM_021565866.1;XM_021625577.1;XM_021581922.1;XM_021624580.1;XM_021565867.1;XM_021591744.1;XM_021591736.1;XM_021565868.1;XM_021565865.1;XM_021604554.1	14	704	111	14558	0.000913809
10	Glycolysis / Gluconeogenesis	XM_021615715.1;XM_021620585.1;XM_021620589.1;XM_021620588.1;XM_021604554.1;XM_021607248.1;XM_021620590.1;XM_021620591.1;XM_021607249.1;XM_021607250.1	10	704	64	14558	0.000931015
4962	Vasopressin-regulated water reabsorption	XM_021577721.1;XM_021577720.1;XM_021577723.1;XM_021577725.1;XM_021577722.1;XM_021577724.1	6	704	25	14558	0.00100596
4622	RIG-I-like receptor signaling pathway	XM_021611752.1;XM_021581058.1;XM_021589280.1;XM_021581924.1;XM_021581928.1;XM_021581925.1;XM_021581926.1;XM_021616543.1;XM_021589278.1;XM_021581927.1;XM_021601623.1;XM_021589279.1;XM_021589281.1;XM_021581059.1;XM_021619012.1	15	704	128	14558	0.00130885
1230	Biosynthesis of amino acids	XM_021568640.1;XM_021620591.1;XM_021564872.1;XM_021614505.1;XM_021620590.1;XM_021620589.1;XM_021607250.1;XM_021564878.1;XM_021620585.1;XM_021607248.1;XM_021607249.1;XM_021568639.1;XM_021620588.1	13	704	103	14558	0.0013667
4512	ECM-receptor interaction	XM_021605897.1;XM_021614620.1;XM_021616020.1;XM_021616015.1;XM_021616012.1;XM_021566980.1;XM_021616011.1;XM_021615848.1;XM_021616203.1;XM_021603410.1;XM_021616016.1;XM_021616014.1;XM_021616018.1;XM_021605895.1;XM_021603401.1;XM_021616013.1;XM_021616008.1;XM_021616010.1;XM_021616017.1;XM_021570344.1;XM_021557675.1;XM_021616019.1	22	704	227	14558	0.00152
4666	Fc gamma R-mediated phagocytosis	XM_021588724.1;XM_021588728.1;XM_021588729.1;XM_021588725.1;XM_021600196.1;XM_021582084.1;XM_021588723.1;XM_021588727.1;XM_021588731.1;XM_021588726.1	10	704	69	14558	0.00168282
4214	Apoptosis - fly	XM_021561490.1;XM_021561489.1;XM_021561491.1;XM_021617365.1;XM_021615838.1;XM_021617301.1;XM_021561492.1;XM_021615837.1	8	704	47	14558	0.00169322
4919	Thyroid hormone signaling pathway	XM_021565305.1;XM_021618152.1;XM_021623450.1;XM_021623542.1;XM_021585136.1;XM_021618150.1;XM_021618149.1;XM_021623451.1;XM_021618151.1;XM_021623453.1;XM_021623452.1	11	704	81	14558	0.00172854
4520	Adherens junction	XM_021584168.1;XM_021566025.1;XM_021588423.1;XM_021604284.1;XM_021619890.1;XM_021584173.1;XM_021584170.1;XM_021584174.1;XM_021566026.1;XM_021584172.1;XM_021604283.1;XM_021584171.1;XM_021620183.1;XM_021584165.1;XM_021604285.1;XM_021616512.1;XM_021619891.1;XM_021566030.1;XM_021577973.1;XM_021566029.1;XM_021584164.1;XM_021584162.1;XM_021566028.1;XM_021578612.1;XM_021584163.1;XM_021566027.1;XM_021584…	35	704	437	14558	0.00239279
4150	mTOR signaling pathway	XM_021590808.1;XM_021558468.1;XM_021558464.1;XM_021615845.1;XM_021590812.1;XM_021590807.1;XM_021590811.1;XM_021590810.1;XM_021585136.1;XM_021615843.1;XM_021625596.1;XM_021560254.1;XM_021560253.1;XM_021558466.1;XM_021602792.1;XM_021558462.1;XM_021590809.1;XM_021558463.1;XM_021581506.1;XM_021558467.1	20	704	218	14558	0.00456388
4070	Phosphatidylinositol signaling system	XM_021564821.1;XM_021601206.1;XM_021581936.1;XM_021564826.1;XM_021605701.1;XM_021605698.1;XM_021605696.1;XM_021605697.1;XM_021574295.1;XM_021586146.1;XM_021564828.1;XM_021575289.1;XM_021564825.1;XM_021586148.1;XM_021574296.1;XM_021614639.1;XM_021564823.1;XM_021564824.1;XM_021624405.1;XM_021594161.1;XM_021573980.1;XM_021605699.1;XM_021581935.1;XM_021586151.1;XM_021605700.1	25	704	295	14558	0.00468016
5320	Autoimmune thyroid disease	XM_021584305.1;XM_021584307.1;XM_021584308.1	3	704	8	14558	0.0052523
4020	Calcium signaling pathway	XM_021565887.1;XM_021615188.1;XM_021588397.1;XM_021615189.1;XM_021603871.1;XM_021601949.1;XM_021615187.1;XM_021581935.1;XM_021583263.1;XM_021603873.1;XM_021573980.1;XM_021615190.1;XM_021581519.1;XM_021615192.1;XM_021581520.1;XM_021615186.1;XM_021620183.1;XM_021565444.1;XM_021564824.1;XM_021588396.1;XM_021564823.1;XM_021564821.1;XM_021622231.1;XM_021615191.1;XM_021564825.1;XM_021581936.1;XM_021603…	30	704	381	14558	0.00600842
1200	Carbon metabolism	XM_021620589.1;XM_021615715.1;XM_021568639.1;XM_021564878.1;XM_021557350.1;XM_021620590.1;XM_021564872.1;XM_021579491.1;XM_021614505.1;XM_021579490.1;XM_021620588.1;XM_021620591.1;XM_021607249.1;XM_021620585.1;XM_021607248.1;XM_021568640.1;XM_021607250.1	17	704	182	14558	0.00716155
4722	Neurotrophin signaling pathway	XM_021600123.1;XM_021616543.1;XM_021600121.1;XM_021600120.1;XM_021600125.1;XM_021600124.1	6	704	37	14558	0.00807271
5200	Pathways in cancer	XM_021565906.1;XM_021565910.1;XM_021616543.1;XM_021589340.1;XM_021565912.1;XM_021589342.1;XM_021618041.1;XM_021565913.1;XM_021589343.1;XM_021578159.1;XM_021625720.1;XM_021625713.1;XM_021565908.1;XM_021565905.1;XM_021578158.1;XM_021565904.1;XM_021565903.1;XM_021565911.1;XM_021565909.1;XM_021625729.1;XM_021589341.1	21	704	246	14558	0.00836882
4370	VEGF signaling pathway	XM_021578159.1;XM_021566027.1;XM_021566029.1;XM_021615189.1;XM_021566030.1;XM_021615192.1;XM_021615191.1;XM_021589730.1;XM_021615190.1;XM_021566025.1;XM_021615188.1;XM_021581506.1;XM_021615187.1;XM_021566026.1;XM_021566028.1;XM_021578158.1;XM_021615186.1	17	704	185	14558	0.00838432
4662	B cell receptor signaling pathway	XM_021582069.1;XM_021616543.1;XM_021605549.1;XM_021557240.1;XM_021557242.1;XM_021605550.1	6	704	39	14558	0.0104437
5146	Amoebiasis	XM_021616543.1;XM_021582897.1;XM_021582898.1;XM_021578158.1;XM_021578159.1	5	704	29	14558	0.0117868
4152	AMPK signaling pathway	XM_021599519.1;XM_021599516.1;XM_021610055.1;XM_021610054.1;XM_021585136.1;XM_021599515.1;XM_021599521.1;XM_021599517.1;XM_021599520.1	9	704	80	14558	0.0148699
30	Pentose phosphate pathway	XM_021620588.1;XM_021620589.1;XM_021620590.1;XM_021620585.1;XM_021614505.1;XM_021620591.1	6	704	44	14558	0.0184513
4115	p53 signaling pathway	XM_021571296.1;XM_021600704.1;XM_021615827.1;XM_021585136.1;XM_021615823.1;XM_021615826.1;XM_021615825.1;XM_021600702.1;XM_021608285.1;XM_021615824.1;XM_021569058.1;XM_021615828.1;XM_021600703.1;XM_021571297.1;XM_021571298.1;XM_021563994.1	16	704	186	14558	0.0184658
4140	Autophagy - animal	XM_021590808.1;XM_021590807.1;XM_021590811.1;XM_021560253.1;XM_021590812.1;XM_021560254.1;XM_021590810.1;XM_021590809.1	8	704	70	14558	0.0193036
4015	Rap1 signaling pathway	XM_021609664.1;XM_021557605.1;XM_021587428.1;XM_021609660.1;XM_021609669.1;XM_021609668.1;XM_021581954.1;XM_021609672.1;XM_021609666.1;XM_021609670.1;XM_021609665.1;XM_021557604.1;XM_021609662.1;XM_021615211.1;XM_021609671.1;XM_021560707.1	16	704	192	14558	0.0240834
20	Citrate cycle (TCA cycle)	XM_021568639.1;XM_021579490.1;XM_021564878.1;XM_021579491.1;XM_021564872.1;XM_021568640.1	6	704	47	14558	0.0248676
4623	Cytosolic DNA-sensing pathway	XM_021598260.1;XM_021589279.1;XM_021589280.1;XM_021589278.1;XM_021619002.1;XM_021589281.1;XM_021616543.1	7	704	61	14558	0.0272008
52	Galactose metabolism	XM_021625992.1;XM_021620590.1;XM_021620585.1;XM_021620591.1;XM_021620588.1;XM_021620589.1	6	704	48	14558	0.0272993
4012	ErbB signaling pathway	XM_021565444.1;XM_021599205.1;XM_021566027.1;XM_021566026.1;XM_021578159.1;XM_021566025.1;XM_021566029.1;XM_021599207.1;XM_021565887.1;XM_021620183.1;XM_021566030.1;XM_021601949.1;XM_021581506.1;XM_021615843.1;XM_021566028.1;XM_021615845.1;XM_021581913.1;XM_021599206.1;XM_021578158.1	19	704	246	14558	0.0300716
5120	Epithelial cell signaling in Helicobacter pylori infection	XM_021607650.1;XM_021607651.1	2	704	6	14558	0.0307632
4930	Type II diabetes mellitus	XM_021559874.1;XM_021559871.1;XM_021559879.1;XM_021559872.1;XM_021559877.1;XM_021559869.1;XM_021559870.1	7	704	64	14558	0.0342604
4621	NOD-like receptor signaling pathway	XM_021559350.1;XM_021559336.1;XM_021559351.1;XM_021559353.1;XM_021559338.1;XM_021611752.1;XM_021582084.1;XM_021559349.1;XM_021615867.1;XM_021559352.1;XM_021559354.1;XM_021616543.1;XM_021559334.1;XM_021559337.1	14	704	170	14558	0.0363492
4510	Focal adhesion	XM_021616011.1;XM_021616008.1;XM_021557887.1;XM_021616018.1;XM_021566027.1;XM_021565444.1;XM_021603401.1;XM_021616013.1;XM_021577885.1;XM_021566028.1;XM_021570344.1;XM_021616017.1;XM_021570318.1;XM_021616010.1;XM_021570319.1;XM_021566026.1;XM_021616012.1;XM_021577884.1;XM_021611490.1;XM_021566030.1;XM_021581506.1;XM_021566025.1;XM_021577882.1;XM_021570320.1;XM_021614620.1;XM_021557675.1;XM_021616…	40	704	619	14558	0.0376633
620	Pyruvate metabolism	XM_021607248.1;XM_021607250.1;XM_021604554.1;XM_021618451.1;XM_021607249.1;XM_021615715.1	6	704	54	14558	0.0451806
71	Fatty acid degradation	XM_021568072.1;XM_021568071.1;XM_021624450.1;XM_021565404.1;XM_021604554.1;XM_021565405.1	6	704	54	14558	0.0451806
3420	Nucleotide excision repair	XM_021600643.1;XM_021578349.1;XM_021580242.1;XM_021600644.1;NM_001124478.1;XM_021600645.1;XM_021600208.1	7	704	69	14558	0.0485421
4911	Insulin secretion	XM_021559872.1;XM_021559874.1;XM_021559879.1;XM_021625623.1;XM_021559871.1;XM_021559869.1;XM_021559877.1;XM_021559870.1	8	704	84	14558	0.0498972
4912	GnRH signaling pathway	XM_021620183.1;XM_021566027.1;XM_021573980.1;XM_021566029.1;XM_021566026.1;XM_021603871.1;XM_021566025.1;XM_021601949.1;XM_021601623.1;XM_021603870.1;XM_021611225.1;XM_021566030.1;XM_021566028.1;XM_021603873.1	14	704	180	14558	0.0541746
1210	2-Oxocarboxylic acid metabolism	XM_021568639.1;XM_021564872.1;XM_021568640.1;XM_021564878.1	4	704	30	14558	0.054815
4064	NF-kappa B signaling pathway	XM_021605549.1;XM_021557242.1;XM_021557240.1;XM_021616543.1;XM_021605550.1	5	704	46	14558	0.0699786
4918	Thyroid hormone synthesis	XM_021584308.1;XM_021584307.1;XM_021584305.1	3	704	21	14558	0.0783904
280	Valine, leucine and isoleucine degradation	XM_021563079.1;XM_021574565.1;XM_021574566.1;XM_021562836.1;XM_021604554.1	5	704	48	14558	0.0809362
1040	Biosynthesis of unsaturated fatty acids	XM_021566111.1;XM_021568071.1;XM_021610813.1;XM_021568072.1	4	704	36	14558	0.0942715
780	Biotin metabolism	XM_021623720.1	1	704	2	14558	0.0943812
770	Pantothenate and CoA biosynthesis	XM_021569458.1;XM_021569457.1	2	704	11	14558	0.0961933
51	Fructose and mannose metabolism	XM_021620588.1;XM_021620591.1;XM_021620585.1;XM_021620589.1;XM_021620590.1	5	704	53	14558	0.112021
591	Linoleic acid metabolism	XM_021581714.1;XM_021615164.1	2	704	13	14558	0.128129
5016	Huntington disease	XM_021577723.1;XM_021577724.1;XM_021577722.1;XM_021577725.1;XM_021577721.1;XM_021577720.1	6	704	72	14558	0.13448
531	Glycosaminoglycan degradation	XM_021610510.1;XM_021610509.1;XM_021568683.1;XM_021568684.1	4	704	41	14558	0.134897
1212	Fatty acid metabolism	XM_021618451.1;XM_021581290.1;XM_021568072.1;XM_021610813.1;XM_021566111.1;XM_021568071.1;XM_021624450.1	7	704	89	14558	0.138959
561	Glycerolipid metabolism	XM_021618214.1;XM_021568608.1;XM_021599021.1;XM_021604554.1;XM_021583013.1;XM_021599020.1;XM_021598154.1;XM_021568607.1	8	704	106	14558	0.140939
4360	Axon guidance	XM_021599049.1;XM_021560707.1;XM_021565733.1;XM_021568527.1;XM_021568526.1;XM_021616228.1;XM_021578158.1;XM_021578159.1;XM_021565734.1;XM_021568530.1;XM_021568531.1;XM_021568535.1;XM_021568533.1;XM_021588392.1;XM_021577975.1;XM_021568532.1;XM_021615924.1;XM_021616229.1;XM_021568529.1;XM_021568534.1	20	704	320	14558	0.144898
3320	PPAR signaling pathway	XM_021588647.1;XM_021568071.1;XM_021560429.1;XM_021560437.1;XM_021568072.1;XM_021604285.1;XM_021601557.1;XM_021624450.1;XM_021604284.1;XM_021560421.1;XM_021604283.1	11	704	160	14558	0.152505
4660	T cell receptor signaling pathway	XM_021557240.1;XM_021605550.1;XM_021616543.1;XM_021605549.1;XM_021557242.1	5	704	59	14558	0.155696
140	Steroid hormone biosynthesis	XM_021610813.1;XM_021566111.1	2	704	15	14558	0.162092
760	Nicotinate and nicotinamide metabolism	XM_021565876.1;XM_021565877.1;XM_021569602.1;XM_021569603.1	4	704	45	14558	0.171633
4110	Cell cycle	XM_021563199.1;XM_021563198.1;XM_021563194.1;XM_021561364.1;XM_021563196.1;XM_021563197.1;XM_021563195.1;XM_021561116.1;XM_021574394.1;XM_021619891.1;XM_021561284.1;XM_021561608.1;XM_021619890.1;XM_021561205.1;XM_021561448.1;XM_021561531.1	16	704	255	14558	0.173431
4950	Maturity onset diabetes of the young	XM_021559871.1;XM_021602770.1;XM_021559870.1;XM_021602769.1;XM_021559874.1;XM_021602768.1;XM_021559872.1;XM_021559877.1;XM_021559879.1;XM_021559869.1	10	704	149	14558	0.185072
592	alpha-Linolenic acid metabolism	XM_021568072.1;XM_021568071.1	2	704	17	14558	0.197417
4340	Hedgehog signaling pathway	XM_021602768.1;XM_021610750.1;XM_021611225.1;XM_021589492.1;XM_021579181.1;XM_021597002.1;XM_021602770.1;XM_021602769.1	8	704	119	14558	0.21815
600	Sphingolipid metabolism	NM_001165131.1;XM_021599020.1;XM_021617593.1;XM_021599021.1;XM_021611124.1;XM_021611119.1	6	704	84	14558	0.220422
970	Aminoacyl-tRNA biosynthesis	XM_021585699.1;XM_021585697.1;XM_021585698.1	3	704	34	14558	0.225598
430	Taurine and hypotaurine metabolism	XM_021566928.1;XM_021566927.1;XM_021566926.1	3	704	35	14558	0.238596
4966	Collecting duct acid secretion	XM_021589369.1;XM_021589370.1	2	704	20	14558	0.251762
4550	Signaling pathways regulating pluripotency of stem cells	XM_021620086.1;XM_021610142.1;XM_021588213.1;XM_021620089.1;XM_021620088.1;XM_021620090.1;XM_021614680.1;XM_021620087.1;XM_021621387.1;XM_021610141.1;XM_021576072.1;XM_021606329.1;XM_021621386.1	13	704	217	14558	0.252248
1051	Biosynthesis of ansamycins	XM_021614505.1	1	704	6	14558	0.257292
512	Mucin type O-glycan biosynthesis	XM_021573466.1;XM_021559993.1;XM_021573465.1	3	704	38	14558	0.27824
72	Synthesis and degradation of ketone bodies	XM_021574566.1;XM_021574565.1	2	704	23	14558	0.306431
564	Glycerophospholipid metabolism	XM_021586146.1;XM_021624405.1;XM_021568608.1;XM_021563618.1;XM_021586151.1;XM_021590255.1;XM_021568607.1;XM_021586148.1;XM_021583013.1;XM_021599020.1;XM_021599021.1	11	704	190	14558	0.313344
5140	Leishmaniasis	XM_021616543.1	1	704	8	14558	0.327418
460	Cyanoamino acid metabolism	XM_021566928.1;XM_021566927.1;XM_021566926.1	3	704	42	14558	0.331876
4931	Insulin resistance	XM_021624450.1;XM_021578615.1;XM_021581506.1;XM_021578616.1;XM_021601557.1;XM_021578617.1;XM_021578614.1;XM_021616543.1;XM_021615845.1;XM_021608620.1;XM_021615843.1;XM_021616512.1;XM_021604465.1;XM_021625095.1;XM_021622483.1;XM_021579702.1;XM_021561660.1;XM_021557887.1;XM_021625098.1;XM_021622939.1;XM_021625097.1;XM_021579704.1;XM_021579703.1	23	704	435	14558	0.359173
4144	Endocytosis	XM_021605645.1;XM_021568484.1;XM_021579741.1;XM_021611471.1;XM_021605643.1;XM_021576172.1;XM_021619426.1;XM_021605650.1;XM_021568483.1;XM_021605646.1;XM_021620183.1;XM_021576628.1;XM_021576173.1;XM_021557326.1;XM_021603386.1;XM_021619891.1;XM_021566026.1;XM_021579742.1;XM_021565887.1;XM_021568480.1;XM_021581913.1;XM_021605647.1;XM_021566030.1;XM_021566025.1;XM_021611470.1;XM_021557324.1;XM_021576…	46	704	897	14558	0.359541
4540	Gap junction	XM_021566025.1;XM_021573980.1;XM_021566027.1;XM_021611225.1;XM_021566028.1;XM_021620183.1;XM_021566030.1;XM_021566029.1;XM_021566026.1;XM_021603870.1;XM_021603873.1;XM_021603871.1	12	704	223	14558	0.394031
4530	Tight junction	XM_021591273.1;XM_021603702.1;XM_021588423.1;XM_021566027.1;XM_021591272.1;XM_021566030.1;XM_021586515.1;XM_021603703.1;XM_021603708.1;XM_021603705.1;XM_021603704.1;XM_021566028.1;XM_021566025.1;XM_021571578.1;XM_021564368.1;XM_021581506.1;XM_021598812.1;XM_021603706.1;XM_021566029.1;XM_021603709.1;XM_021601403.1;XM_021566026.1;XM_021564370.1;XM_021598821.1;XM_021572228.1	25	704	488	14558	0.412003
254	Aflatoxin biosynthesis	XM_021618451.1	1	704	11	14558	0.420405
5215	Prostate cancer	XM_021616543.1	1	704	11	14558	0.420405
4620	Toll-like receptor signaling pathway	XM_021611392.1;XM_021589281.1;XM_021611752.1;XM_021616543.1;XM_021581506.1;XM_021589279.1;XM_021589280.1;XM_021611391.1;XM_021589278.1	9	704	170	14558	0.439145
630	Glyoxylate and dicarboxylate metabolism	XM_021607338.1;XM_021557350.1;XM_021564872.1;XM_021564878.1	4	704	70	14558	0.440635
500	Starch and sucrose metabolism	XM_021625992.1;XM_021613037.1;XM_021613036.1	3	704	51	14558	0.450674
4114	Oocyte meiosis	XM_021615187.1;XM_021615186.1;XM_021615190.1;XM_021611225.1;XM_021615188.1;XM_021615189.1;XM_021557887.1;XM_021615192.1;XM_021615191.1;XM_021601949.1;XM_021573980.1	11	704	215	14558	0.468047
4917	Prolactin signaling pathway	XM_021616543.1	1	704	13	14558	0.475148
4933	AGE-RAGE signaling pathway in diabetic complications	XM_021574394.1;XM_021564823.1;XM_021564825.1;XM_021616543.1;XM_021564821.1;XM_021619890.1;XM_021564826.1;XM_021619891.1;XM_021614620.1;XM_021564824.1;XM_021581506.1;XM_021564828.1	12	704	238	14558	0.48324
3018	RNA degradation	XM_021560885.1;XM_021603662.1;XM_021607651.1;XM_021578267.1;XM_021607650.1;XM_021620588.1;XM_021620591.1;XM_021620585.1;XM_021620590.1;XM_021620589.1;XM_021567672.1	11	704	219	14558	0.492735
650	Butanoate metabolism	XM_021574566.1;XM_021574565.1	2	704	34	14558	0.49452
4350	TGF-beta signaling pathway	XM_021570134.1;XM_021574394.1;XM_021576947.1;XM_021567973.1;XM_021567975.1;XM_021619891.1;XM_021614334.1;XM_021567974.1;XM_021567976.1;XM_021570135.1;XM_021619890.1	11	704	220	14558	0.498867
4910	Insulin signaling pathway	XM_021581913.1;XM_021625095.1;XM_021585136.1;XM_021604285.1;XM_021611225.1;XM_021618451.1;XM_021581290.1;XM_021615843.1;XM_021625098.1;XM_021604465.1;XM_021604023.1;XM_021616512.1;XM_021604284.1;XM_021581506.1;XM_021625097.1;XM_021604283.1;XM_021615845.1;XM_021604022.1;XM_021557887.1;XM_021604021.1	20	704	406	14558	0.499097
4062	Chemokine signaling pathway	XM_021578158.1;XM_021616543.1;XM_021578159.1	3	704	55	14558	0.500794
4974	Protein digestion and absorption	XM_021570676.1;XM_021572038.1;XM_021567501.1;XM_021572040.1;XM_021572039.1;XM_021572041.1	6	704	117	14558	0.501112
61	Fatty acid biosynthesis	XM_021581290.1;XM_021618451.1	2	704	35	14558	0.51003
340	Histidine metabolism	XM_021604554.1	1	704	15	14558	0.524727
4014	Ras signaling pathway	XM_021604508.1;XM_021604204.1;XM_021616543.1;XM_021557604.1;XM_021604509.1;XM_021604205.1;XM_021557605.1;XM_021604507.1;XM_021604203.1;XM_021560707.1	10	704	205	14558	0.534854
3010	Ribosome	XM_021564907.1;XM_021564906.1;XM_021607338.1	3	704	58	14558	0.536807
62	Fatty acid elongation	XM_021566111.1;XM_021610813.1	2	704	38	14558	0.554647
4727	GABAergic synapse	XM_021598919.1;XM_021615532.1;XM_021598918.1;XM_021621662.1	4	704	81	14558	0.555187
590	Arachidonic acid metabolism	XM_021581714.1;XM_021587254.1;XM_021589730.1;XM_021615164.1	4	704	82	14558	0.564985
410	beta-Alanine metabolism	XM_021604554.1	1	704	17	14558	0.569629
4711	Circadian rhythm - fly	XM_021610750.1	1	704	17	14558	0.569629
4211	Longevity regulating pathway	XM_021585136.1;XM_021616543.1	2	704	40	14558	0.582752
4151	PI3K-Akt signaling pathway	XM_021585136.1;XM_021578159.1;XM_021616543.1;XM_021560707.1;XM_021578158.1	5	704	106	14558	0.586798
5033	Nicotine addiction	XM_021615532.1	1	704	18	14558	0.590466
3022	Basal transcription factors	XM_021600643.1;XM_021600644.1;XM_021600645.1	3	704	63	14558	0.59338
4916	Melanogenesis	XM_021579702.1;XM_021604336.1;XM_021579703.1;XM_021579181.1;XM_021597002.1;XM_021579704.1;XM_021601949.1;XM_021611225.1	8	704	172	14558	0.595835
4670	Leukocyte transendothelial migration	XM_021578158.1;XM_021578159.1	2	704	41	14558	0.596307
4141	Protein processing in endoplasmic reticulum	XM_021560437.1;XM_021612230.1;XM_021595429.1;XM_021600208.1;XM_021593660.1;XM_021564987.1;NM_001124478.1;XM_021564986.1;XM_021602258.1;XM_021612229.1;XM_021593667.1;XM_021564988.1;XM_021560429.1;XM_021607738.1;XM_021556888.1;XM_021595434.1;XM_021560421.1;XM_021600070.1;XM_021578349.1	19	704	407	14558	0.597027
480	Glutathione metabolism	XM_021566928.1;XM_021566926.1;XM_021566927.1	3	704	64	14558	0.604143
53	Ascorbate and aldarate metabolism	XM_021604554.1	1	704	19	14558	0.610295
5030	Cocaine addiction	XM_021613925.1;XM_021616543.1	2	704	43	14558	0.622417
5202	Transcriptional misregulation in cancer	XM_021559874.1;XM_021559879.1;XM_021606611.1;XM_021608285.1;XM_021559869.1;XM_021616543.1;XM_021559872.1;XM_021559871.1;XM_021578159.1;XM_021565915.1;XM_021559870.1;XM_021610963.1;XM_021610962.1;XM_021578158.1;XM_021606603.1;XM_021559877.1	16	704	350	14558	0.628282
4310	Wnt signaling pathway	XM_021615191.1;XM_021566460.1;XM_021566463.1;XM_021597002.1;XM_021566461.1;XM_021566462.1;XM_021615188.1;XM_021615186.1;XM_021611225.1;XM_021601949.1;XM_021561755.1;XM_021615192.1;XM_021579181.1;XM_021615190.1;XM_021611752.1;XM_021615189.1;XM_021610750.1;XM_021615187.1	18	704	393	14558	0.628734
4920	Adipocytokine signaling pathway	XM_021588647.1;XM_021581506.1;XM_021616543.1;XM_021622939.1;XM_021622483.1;XM_021615845.1;XM_021624450.1;XM_021615843.1	8	704	178	14558	0.634538
5142	Chagas disease (American trypanosomiasis)	XM_021616543.1	1	704	21	14558	0.647122
4390	Hippo signaling pathway	XM_021614680.1;XM_021576489.1;XM_021617960.1;XM_021617962.1;XM_021576487.1;XM_021617963.1;XM_021617959.1;XM_021617961.1	8	704	182	14558	0.659163
100	Steroid biosynthesis	XM_021607019.1	1	704	23	14558	0.680474
5221	Acute myeloid leukemia	XM_021616543.1	1	704	23	14558	0.680474
4614	Renin-angiotensin system	XM_021560611.1	1	704	23	14558	0.680474
5100	Bacterial invasion of epithelial cells	XM_021578159.1;XM_021578158.1	2	704	48	14558	0.681938
532	Glycosaminoglycan biosynthesis - chondroitin sulfate / dermatan sulfate	XM_021572150.1;XM_021572152.1	2	704	50	14558	0.703506
5160	Hepatitis C	XM_021616543.1	1	704	26	14558	0.724693
5133	Pertussis	XM_021616543.1	1	704	26	14558	0.724693
4380	Osteoclast differentiation	XM_021616543.1	1	704	27	14558	0.73803
511	Other glycan degradation	XM_021625942.1	1	704	27	14558	0.73803
4071	Sphingolipid signaling pathway	XM_021616543.1	1	704	27	14558	0.73803
190	Oxidative phosphorylation	XM_021590664.1;XM_021576252.1	2	704	54	14558	0.742988
4142	Lysosome	XM_021579325.1;XM_021567714.1;XM_021586956.1;XM_021558686.1;XM_021558687.1;XM_021567715.1;XM_021616470.1;XM_021579327.1;XM_021625992.1;XM_021581693.1	10	704	243	14558	0.743659
4010	MAPK signaling pathway	XM_021584952.1;XM_021568977.1;XM_021562350.1;XM_021615188.1;XM_021595429.1;XM_021615189.1;XM_021580762.1;XM_021581506.1;XM_021615191.1;XM_021611392.1;XM_021615190.1;XM_021611391.1;XM_021574394.1;XM_021580765.1;XM_021615186.1;XM_021584951.1;XM_021604205.1;XM_021620183.1;XM_021611225.1;XM_021616543.1;XM_021608620.1;XM_021615192.1;XM_021569476.1;XM_021604203.1;XM_021581313.1;XM_021581312.1;XM_021580…	33	704	754	14558	0.751229
4146	Peroxisome	XM_021574565.1;XM_021568072.1;XM_021557350.1;XM_021574566.1;XM_021565404.1;XM_021565405.1;XM_021568071.1	7	704	177	14558	0.758367
5162	Measles	XM_021616543.1	1	704	29	14558	0.7628
5212	Pancreatic cancer	XM_021616543.1	1	704	29	14558	0.7628
5169	Epstein-Barr virus infection	XM_021616543.1;XM_021610593.1;XM_021610592.1	3	704	82	14558	0.764829
5161	Hepatitis B	XM_021616543.1	1	704	30	14558	0.774294
5340	Primary immunodeficiency	XM_021582069.1	1	704	31	14558	0.785231
5231	Choline metabolism in cancer	XM_021585136.1;XM_021619281.1	2	704	59	14558	0.785929
5321	Inflammatory bowel disease (IBD)	XM_021616543.1	1	704	32	14558	0.795639
5152	Tuberculosis	XM_021605549.1;XM_021616543.1;XM_021605550.1	3	704	89	14558	0.811102
4932	Non-alcoholic fatty liver disease (NAFLD)	XM_021616543.1	1	704	34	14558	0.814968
4210	Apoptosis	XM_021616543.1;XM_021588423.1	2	704	63	14558	0.81561
4721	Synaptic vesicle cycle	XM_021586450.1;XM_021586449.1;XM_021586451.1	3	704	90	14558	0.817042
5145	Toxoplasmosis	XM_021616543.1	1	704	35	14558	0.823937
260	Glycine, serine and threonine metabolism	XM_021607338.1	1	704	35	14558	0.823937
3008	Ribosome biogenesis in eukaryotes	XM_021587428.1;XM_021577747.1	2	704	66	14558	0.835399
830	Retinol metabolism	XM_021598154.1	1	704	37	14558	0.840593
4072	Phospholipase D signaling pathway	XM_021585136.1	1	704	38	14558	0.848321
5166	Human T-cell leukemia virus 1 infection	XM_021612955.1;XM_021612959.1;XM_021573858.1;XM_021616543.1;XM_021612958.1	5	704	151	14558	0.860651
4978	Mineral absorption	XM_021577828.1;XM_021579209.1	2	704	72	14558	0.869316
4725	Cholinergic synapse	XM_021615867.1	1	704	41	14558	0.869333
4971	Gastric acid secretion	NM_001130994.1	1	704	42	14558	0.875669
4672	Intestinal immune network for IgA production	XM_021558988.1	1	704	43	14558	0.881699
4744	Phototransduction	XM_021597939.1	1	704	43	14558	0.881699
4066	HIF-1 signaling pathway	XM_021616543.1	1	704	43	14558	0.881699
4925	Aldosterone synthesis and secretion	XM_021587428.1	1	704	46	14558	0.898092
330	Arginine and proline metabolism	XM_021604554.1	1	704	48	14558	0.90774
5032	Morphine addiction	XM_021615532.1	1	704	48	14558	0.90774
4270	Vascular smooth muscle contraction	XM_021573980.1;XM_021603873.1;XM_021557887.1;XM_021603870.1;XM_021582069.1;XM_021611225.1;XM_021583263.1;XM_021603871.1	8	704	245	14558	0.910993
534	Glycosaminoglycan biosynthesis - heparan sulfate / heparin	XM_021607587.1	1	704	51	14558	0.920529
5134	Legionellosis	XM_021616543.1	1	704	52	14558	0.924385
4668	TNF signaling pathway	XM_021616543.1	1	704	52	14558	0.924385
533	Glycosaminoglycan biosynthesis - keratan sulfate	XM_021560697.1	1	704	53	14558	0.928055
520	Amino sugar and nucleotide sugar metabolism	XM_021599467.1	1	704	53	14558	0.928055
565	Ether lipid metabolism	XM_021599021.1;XM_021599020.1	2	704	88	14558	0.930784
5168	Herpes simplex virus 1 infection	XM_021616927.1;XM_021616543.1;XM_021576567.1;XM_021599418.1;XM_021611752.1;XM_021569747.1;XM_021611391.1;XM_021569746.1;XM_021611392.1;NM_001165129.1;XM_021557887.1;XM_021622483.1;XM_021599417.1	13	704	383	14558	0.933345
3040	Spliceosome	XM_021612137.1;XM_021567712.1;XM_021579684.1;XM_021576567.1;XM_021579683.1;XM_021589899.1;XM_021612138.1;XM_021558038.1	8	704	258	14558	0.935751
4391	Hippo signaling pathway - fly	XM_021610750.1;XM_021583293.1;XM_021578560.1	3	704	121	14558	0.936416
4060	Cytokine-cytokine receptor interaction	XM_021604336.1;XM_021579461.1;XM_021579462.1;XM_021620183.1;XM_021588190.1;XM_021579463.1;XM_021574394.1	7	704	243	14558	0.952755
4810	Regulation of actin cytoskeleton	XM_021566027.1;XM_021566030.1;XM_021577885.1;XM_021577883.1;XM_021566026.1;XM_021621660.1;XM_021578158.1;XM_021557887.1;XM_021557675.1;XM_021561731.1;XM_021577884.1;XM_021621659.1;XM_021578159.1;XM_021566025.1;XM_021577882.1;XM_021566029.1;XM_021621657.1;XM_021620183.1;XM_021583263.1;XM_021582069.1;XM_021566028.1;XM_021621658.1;XM_021611490.1	23	704	648	14558	0.956214
5034	Alcoholism	XM_021615275.1	1	704	63	14558	0.956262
4742	Taste transduction	XM_021615532.1	1	704	65	14558	0.960408
3460	Fanconi anemia pathway	XM_021586528.1	1	704	66	14558	0.962331
4723	Retrograde endocannabinoid signaling	XM_021615532.1	1	704	68	14558	0.965902
5132	Salmonella infection	XM_021601809.1;XM_021611392.1;XM_021611391.1;XM_021616543.1	4	704	169	14558	0.966222
510	N-Glycan biosynthesis	XM_021560697.1;XM_021556696.1	2	704	106	14558	0.967057
5206	MicroRNAs in cancer	XM_021610593.1;XM_021616543.1;XM_021610592.1	3	704	139	14558	0.967156
4320	Dorso-ventral axis formation	XM_021591476.1;XM_021620183.1;XM_021557244.1;XM_021574440.1;XM_021557245.1;XM_021605599.1;NM_001135695.1	7	704	272	14558	0.97959
4024	cAMP signaling pathway	XM_021616543.1	1	704	79	14558	0.980289
5203	Viral carcinogenesis	XM_021616543.1;XM_021576487.1;XM_021576489.1	3	704	158	14558	0.984099
514	Other types of O-glycan biosynthesis	XM_021560697.1	1	704	84	14558	0.984637
5205	Proteoglycans in cancer	XM_021578159.1;XM_021578158.1	2	704	127	14558	0.986519
4261	Adrenergic signaling in cardiomyocytes	XM_021611225.1;XM_021557604.1;XM_021557887.1;XM_021579704.1;XM_021601949.1;XM_021579702.1;XM_021579703.1;XM_021581506.1;XM_021557605.1	9	704	348	14558	0.988506
5164	Influenza A	XM_021581675.1;XM_021616543.1	2	704	135	14558	0.990467
4330	Notch signaling pathway	XM_021556257.1;XM_021625941.1;NM_001135695.1;XM_021605599.1	4	704	217	14558	0.994023
3015	mRNA surveillance pathway	XM_021557887.1;XM_021609564.1;XM_021609565.1;XM_021585198.1	4	704	221	14558	0.994859
4260	Cardiac muscle contraction	XM_021590664.1	1	704	115	14558	0.996731
4145	Phagosome	NM_001124478.1;XM_021600208.1;XM_021591098.1;XM_021578349.1;XM_021557675.1	5	704	273	14558	0.997438
230	Purine metabolism	XM_021587890.1;XM_021607250.1;XM_021571890.1;XM_021607248.1;XM_021607249.1;XM_021598189.1	6	704	317	14558	0.998296
4068	FoxO signaling pathway	XM_021619890.1;XM_021557350.1;XM_021620183.1;XM_021619891.1;XM_021610750.1;XM_021581506.1;XM_021574394.1;XM_021622575.1;XM_021614063.1	9	704	418	14558	0.998664
4630	Jak-STAT signaling pathway	XM_021615845.1;XM_021622483.1;XM_021615843.1;XM_021581506.1	4	704	276	14558	0.999401
4914	Progesterone-mediated oocyte maturation	XM_021611225.1;XM_021581506.1	2	704	202	14558	0.999523
601	Glycosphingolipid biosynthesis - lacto and neolacto series	XM_021560697.1	1	704	193	14558	0.999934
4080	Neuroactive ligand-receptor interaction	XM_021624144.1;XM_021581059.1;XM_021624140.1;XM_021581058.1;XM_021624141.1;XM_021615532.1;XM_021624143.1	7	704	488	14558	0.99999
4514	Cell adhesion molecules (CAMs)	XM_021564370.1;XM_021563775.1;XM_021604465.1;XM_021571578.1;XM_021609617.1;XM_021598812.1;XM_021564368.1;XM_021598821.1;XM_021603716.1	9	704	559	14558	0.99999
3013	RNA transport	XM_021612138.1;XM_021581406.1;XM_021612137.1	3	704	341	14558	0.999993

## Sheet: Cluster 22
pathway_id	pathway_name	Genes	S gene number	TS gene number	B gene number	TB gene number	pvalue
601	Glycosphingolipid biosynthesis - lacto and neolacto series	XM_021588133.1;XM_021588181.1;XM_021588149.1;XM_021588182.1;XM_021588174.1;XM_021588138.1;XM_021588156.1;XM_021588176.1;XM_021588165.1;XM_021588171.1;XM_021588160.1;XM_021588150.1;XM_021588137.1;XM_021588167.1;XM_021588163.1;XM_021588161.1;XM_021588145.1;XM_021588146.1;XM_021588154.1;XM_021588139.1;XM_021588168.1;XM_021588180.1;XM_021588147.1;XM_021588159.1;XM_021587036.1;XM_021588175.1;XM_021588…	52	288	193	14558	0
603	Glycosphingolipid biosynthesis - globo and isoglobo series	XM_021588139.1;XM_021588164.1;XM_021588171.1;XM_021588176.1;XM_021588144.1;XM_021588141.1;XM_021588183.1;XM_021588166.1;XM_021588156.1;XM_021588152.1;XM_021588179.1;XM_021588145.1;XM_021588157.1;XM_021588175.1;XM_021588165.1;XM_021588163.1;XM_021588158.1;XM_021588154.1;XM_021588146.1;XM_021588133.1;XM_021588136.1;XM_021588153.1;XM_021588159.1;XM_021588178.1;XM_021588143.1;XM_021588137.1;XM_021588…	50	288	130	14558	0
5216	Thyroid cancer	XM_021598456.1;XM_021601619.1;XM_021598411.1;XM_021598391.1;XM_021598393.1;XM_021598422.1;XM_021598429.1;XM_021598416.1;XM_021598438.1;XM_021598388.1;XM_021601615.1;XM_021598444.1;XM_021601617.1;XM_021598450.1;XM_021598406.1;XM_021601612.1;XM_021598433.1;XM_021598395.1;XM_021598402.1	19	288	27	14558	4.52701e-27
4260	Cardiac muscle contraction	XM_021601617.1;XM_021598395.1;XM_021577765.1;XM_021601615.1;XM_021598393.1;XM_021598438.1;XM_021598406.1;XM_021598433.1;XM_021589039.1;XM_021598450.1;XM_021613936.1;XM_021598444.1;XM_021598422.1;XM_021598429.1;XM_021598391.1;XM_021577764.1;XM_021598456.1;XM_021598388.1;XM_021598416.1;XM_021601612.1;XM_021598411.1;XM_021601619.1;XM_021598402.1	23	288	115	14558	1.11022e-16
5414	Dilated cardiomyopathy (DCM)	XM_021601612.1;XM_021598444.1;XM_021601615.1;XM_021598438.1;XM_021598416.1;XM_021598450.1;XM_021598395.1;XM_021598388.1;XM_021598393.1;XM_021588193.1;XM_021588194.1;XM_021598422.1;XM_021598411.1;XM_021598391.1;XM_021601617.1;XM_021608144.1;XM_021598456.1;XM_021598429.1;XM_021601619.1;XM_021598433.1;XM_021598406.1;XM_021598402.1	22	288	162	14558	1.00464e-12
5410	Hypertrophic cardiomyopathy (HCM)	XM_021598444.1;XM_021601617.1;XM_021598429.1;XM_021598406.1;XM_021598422.1;XM_021598402.1;XM_021598395.1;XM_021601612.1;XM_021598438.1;XM_021598391.1;XM_021598393.1;XM_021588194.1;XM_021598416.1;XM_021598411.1;XM_021601615.1;XM_021598388.1;XM_021598433.1;XM_021588193.1;XM_021601619.1;XM_021598450.1;XM_021598456.1	21	288	160	14558	6.55198e-12
4261	Adrenergic signaling in cardiomyocytes	XM_021598388.1;XM_021601619.1;XM_021598393.1;XM_021598429.1;XM_021598395.1;XM_021598433.1;XM_021598422.1;XM_021590731.1;XM_021608144.1;XM_021590729.1;XM_021590728.1;XM_021598444.1;XM_021598402.1;XM_021598411.1;XM_021598450.1;XM_021598456.1;XM_021601612.1;XM_021598438.1;XM_021601617.1;XM_021577764.1;XM_021590730.1;XM_021598406.1;XM_021590732.1;XM_021598416.1;XM_021577765.1;XM_021598391.1;XM_021601…	28	288	348	14558	2.98594e-10
5200	Pathways in cancer	XM_021608524.1;XM_021598406.1;XM_021590090.1;XM_021598433.1;XM_021601783.1;XM_021598395.1;XM_021601612.1;XM_021598402.1;XM_021598438.1;XM_021598450.1;XM_021601619.1;XM_021598456.1;XM_021598393.1;XM_021601617.1;XM_021598391.1;XM_021598444.1;XM_021598411.1;XM_021598416.1;XM_021598429.1;XM_021598388.1;XM_021601615.1;XM_021608144.1;XM_021598422.1	23	288	246	14558	6.84491e-10
5130	Pathogenic Escherichia coli infection	XM_021558226.1;XM_021558216.1;XM_021558251.1;XM_021558234.1;XM_021558208.1;XM_021558243.1	6	288	29	14558	1.84241e-05
5100	Bacterial invasion of epithelial cells	XM_021571420.1;XM_021623212.1;XM_021623213.1;XM_021571421.1;XM_021623214.1;XM_021571419.1	6	288	48	14558	0.000347336
4270	Vascular smooth muscle contraction	XM_021608456.1;XM_021581343.1;XM_021608144.1;XM_021604656.1;XM_021604642.1;NM_001124291.1;XM_021604665.1;XM_021604648.1;XM_021579612.1;XM_021611530.1;XM_021604632.1;XM_021604624.1;XM_021604617.1	13	288	245	14558	0.00121376
4974	Protein digestion and absorption	XM_021601287.1;XM_021613393.1;XM_021613390.1;XM_021613391.1;XM_021613392.1;XM_021613389.1;XM_021620240.1;XM_021613394.1	8	288	117	14558	0.00225754
4620	Toll-like receptor signaling pathway	XM_021575869.1;XM_021590731.1;XM_021600499.1;XM_021590729.1;XM_021590730.1;XM_021590732.1;XM_021575870.1;XM_021600509.1;XM_021590728.1	9	288	170	14558	0.00677104
4914	Progesterone-mediated oocyte maturation	XM_021590732.1;XM_021590730.1;XM_021608144.1;XM_021602164.1;XM_021590731.1;XM_021590728.1;XM_021598084.1;XM_021590729.1;XM_021575870.1;XM_021575869.1	10	288	202	14558	0.00701297
4530	Tight junction	XM_021625315.1;XM_021567802.1;XM_021567801.1;XM_021590106.1;XM_021590103.1;XM_021590105.1;XM_021556978.1;XM_021556977.1;XM_021625316.1;XM_021625313.1;XM_021611530.1;XM_021619875.1;XM_021625312.1;XM_021625311.1;XM_021590104.1;XM_021556976.1;XM_021625314.1;NM_001160650.1	18	288	488	14558	0.00852065
3060	Protein export	XM_021581858.1;XM_021581857.1	2	288	8	14558	0.0100935
4130	SNARE interactions in vesicular transport	XM_021622043.1;XM_021622044.1;XM_021583441.1;XM_021622042.1	4	288	57	14558	0.0261118
3010	Ribosome	XM_021588193.1;XM_021584330.1;XM_021588194.1;XM_021566282.1	4	288	58	14558	0.0276237
4370	VEGF signaling pathway	XM_021590729.1;XM_021590728.1;XM_021590732.1;XM_021566034.1;XM_021566033.1;XM_021590730.1;XM_021590731.1;XM_021566035.1	8	288	185	14558	0.0309841
5416	Viral myocarditis	XM_021588193.1;XM_021617609.1;XM_021588194.1;XM_021623977.1	4	288	63	14558	0.0359562
10	Glycolysis / Gluconeogenesis	XM_021602314.1;XM_021576423.1;XM_021623341.1;XM_021605689.1	4	288	64	14558	0.0377785
5110	Vibrio cholerae infection	XM_021608144.1	1	288	2	14558	0.0391758
4810	Regulation of actin cytoskeleton	XM_021602526.1;XM_021565550.1;XM_021590731.1;XM_021590730.1;XM_021625670.1;XM_021590732.1;XM_021589941.1;XM_021591193.1;XM_021590728.1;XM_021590729.1;XM_021565552.1;XM_021582078.1;XM_021612815.1;XM_021558579.1;XM_021623219.1;XM_021623220.1;XM_021573961.1;XM_021611530.1;XM_021589942.1	19	288	648	14558	0.0567347
330	Arginine and proline metabolism	XM_021613761.1;XM_021582210.1;XM_021582209.1	3	288	48	14558	0.0691158
982	Drug metabolism - cytochrome P450	XM_021589096.1;XM_021589095.1	2	288	23	14558	0.0751536
3410	Base excision repair	XM_021591530.1;XM_021590217.1;XM_021590218.1	3	288	51	14558	0.079772
620	Pyruvate metabolism	XM_021605689.1;XM_021624145.1;XM_021605213.1	3	288	54	14558	0.0910931
5012	Parkinson disease	XM_021608144.1;XM_021578613.1	2	288	28	14558	0.105387
5212	Pancreatic cancer	XM_021590090.1;XM_021601783.1	2	288	29	14558	0.111775
4913	Ovarian steroidogenesis	XM_021608144.1	1	288	6	14558	0.112998
4012	ErbB signaling pathway	XM_021590730.1;XM_021590732.1;XM_021575869.1;XM_021582078.1;XM_021590729.1;XM_021590728.1;XM_021575870.1;XM_021590731.1	8	288	246	14558	0.115894
4068	FoxO signaling pathway	XM_021590730.1;XM_021590729.1;XM_021590728.1;XM_021598084.1;XM_021575870.1;XM_021590732.1;XM_021590731.1;XM_021575869.1;XM_021583283.1;XM_021612276.1;XM_021577220.1;XM_021598948.1	12	288	418	14558	0.126981
4720	Long-term potentiation	XM_021608144.1	1	288	7	14558	0.130553
4213	Longevity regulating pathway - multiple species	XM_021608144.1;XM_021583283.1	2	288	32	14558	0.131501
480	Glutathione metabolism	XM_021569971.1;XM_021589095.1;XM_021589096.1	3	288	64	14558	0.133104
4150	mTOR signaling pathway	XM_021590731.1;XM_021590732.1;XM_021598948.1;XM_021590729.1;XM_021590728.1;XM_021625523.1;XM_021590730.1	7	288	218	14558	0.14215
1230	Biosynthesis of amino acids	XM_021576423.1;XM_021623341.1;XM_021602314.1;XM_021613761.1	4	288	103	14558	0.147307
260	Glycine, serine and threonine metabolism	XM_021602314.1;XM_021576423.1	2	288	35	14558	0.151944
4310	Wnt signaling pathway	XM_021575870.1;XM_021577220.1;XM_021566034.1;XM_021575869.1;XM_021566035.1;XM_021563222.1;XM_021571134.1;XM_021566033.1;XM_021611530.1;XM_021608144.1;XM_021563221.1	11	288	393	14558	0.157423
510	N-Glycan biosynthesis	XM_021604905.1;XM_021608310.1;XM_021587036.1;XM_021613055.1	4	288	106	14558	0.158431
4115	p53 signaling pathway	XM_021570672.1;XM_021568020.1;XM_021565292.1;XM_021577220.1;XM_021625652.1;XM_021605583.1	6	288	186	14558	0.163899
270	Cysteine and methionine metabolism	XM_021605689.1;XM_021616488.1;XM_021616490.1	3	288	71	14558	0.165788
4072	Phospholipase D signaling pathway	XM_021590090.1;XM_021601783.1	2	288	38	14558	0.172955
5020	Prion diseases	XM_021608144.1	1	288	10	14558	0.181167
4933	AGE-RAGE signaling pathway in diabetic complications	XM_021590728.1;XM_021590729.1;XM_021590730.1;XM_021590731.1;XM_021575869.1;XM_021590732.1;XM_021575870.1	7	288	238	14558	0.19327
980	Metabolism of xenobiotics by cytochrome P450	XM_021589095.1;XM_021589096.1	2	288	43	14558	0.208873
563	Glycosylphosphatidylinositol (GPI)-anchor biosynthesis	XM_021617191.1;NM_001165228.1	2	288	45	14558	0.223455
4961	Endocrine and other factor-regulated calcium reabsorption	XM_021608144.1	1	288	13	14558	0.228844
4070	Phosphatidylinositol signaling system	XM_021583487.1;XM_021583488.1;XM_021590731.1;XM_021626149.1;XM_021590728.1;XM_021590732.1;XM_021590729.1;XM_021590730.1	8	288	295	14558	0.230556
4925	Aldosterone synthesis and secretion	XM_021608144.1;XM_021587478.1	2	288	46	14558	0.230775
514	Other types of O-glycan biosynthesis	XM_021571195.1;XM_021587036.1;XM_021604905.1	3	288	84	14558	0.231545
5132	Salmonella infection	XM_021575869.1;XM_021575870.1;XM_021612815.1;XM_021589941.1;XM_021589942.1	5	288	169	14558	0.243385
5031	Amphetamine addiction	XM_021608144.1	1	288	14	14558	0.244113
5144	Malaria	XM_021578572.1	1	288	14	14558	0.244113
4622	RIG-I-like receptor signaling pathway	XM_021600499.1;XM_021600509.1;XM_021575870.1;XM_021575869.1	4	288	128	14558	0.247844
533	Glycosaminoglycan biosynthesis - keratan sulfate	XM_021587036.1;XM_021604905.1	2	288	53	14558	0.282261
190	Oxidative phosphorylation	XM_021620428.1;XM_021613936.1	2	288	54	14558	0.289614
1200	Carbon metabolism	XM_021620428.1;XM_021623341.1;XM_021605213.1;XM_021576423.1;XM_021602314.1	5	288	182	14558	0.292369
4923	Regulation of lipolysis in adipocytes	XM_021608144.1	1	288	20	14558	0.329605
5210	Colorectal cancer	XM_021601783.1	1	288	20	14558	0.329605
4623	Cytosolic DNA-sensing pathway	XM_021600509.1;XM_021600499.1	2	288	61	14558	0.340697
4510	Focal adhesion	XM_021577220.1;XM_021564884.1;XM_021575870.1;XM_021590731.1;XM_021611530.1;XM_021582078.1;XM_021590729.1;XM_021575869.1;XM_021581710.1;XM_021598084.1;XM_021590732.1;XM_021564151.1;XM_021590728.1;XM_021590730.1	14	288	619	14558	0.341962
4750	Inflammatory mediator regulation of TRP channels	XM_021608144.1	1	288	21	14558	0.342886
4918	Thyroid hormone synthesis	XM_021608144.1	1	288	21	14558	0.342886
4931	Insulin resistance	XM_021590732.1;XM_021575869.1;XM_021590728.1;XM_021614206.1;XM_021575870.1;XM_021598948.1;XM_021583283.1;XM_021590730.1;XM_021590731.1;XM_021590729.1	10	288	435	14558	0.359411
4924	Renin secretion	XM_021608144.1	1	288	23	14558	0.368666
5221	Acute myeloid leukemia	XM_021608524.1	1	288	23	14558	0.368666
3008	Ribosome biogenesis in eukaryotes	XM_021611603.1;XM_021611604.1	2	288	66	14558	0.376494
3050	Proteasome	XM_021557932.1	1	288	24	14558	0.381175
4962	Vasopressin-regulated water reabsorption	XM_021608144.1	1	288	25	14558	0.393437
5160	Hepatitis C	XM_021578572.1	1	288	26	14558	0.405458
4972	Pancreatic secretion	XM_021620240.1;XM_021568259.1	2	288	71	14558	0.411469
4921	Oxytocin signaling pathway	XM_021608144.1;XM_021612806.1	2	288	71	14558	0.411469
4910	Insulin signaling pathway	XM_021575870.1;XM_021590731.1;XM_021590730.1;XM_021590728.1;XM_021582078.1;XM_021590729.1;XM_021608144.1;XM_021590732.1;XM_021575869.1	9	288	406	14558	0.411957
350	Tyrosine metabolism	XM_021625144.1	1	288	28	14558	0.428791
4724	Glutamatergic synapse	XM_021608144.1;XM_021564450.1	2	288	74	14558	0.431988
5162	Measles	XM_021590085.1	1	288	29	14558	0.440113
5146	Amoebiasis	XM_021608144.1	1	288	29	14558	0.440113
4916	Melanogenesis	XM_021608144.1;XM_021563222.1;XM_021563221.1;XM_021613853.1	4	288	172	14558	0.443604
5161	Hepatitis B	XM_021621480.1	1	288	30	14558	0.451211
640	Propanoate metabolism	XM_021605689.1	1	288	30	14558	0.451211
4630	Jak-STAT signaling pathway	XM_021590729.1;XM_021590732.1;XM_021590730.1;XM_021590728.1;XM_021590731.1;XM_021577220.1	6	288	276	14558	0.465749
4740	Olfactory transduction	XM_021608144.1;XM_021612806.1	2	288	80	14558	0.471843
4713	Circadian entrainment	XM_021608144.1	1	288	38	14558	0.532457
4662	B cell receptor signaling pathway	XM_021578572.1	1	288	39	14558	0.54173
5202	Transcriptional misregulation in cancer	XM_021613460.1;XM_021568020.1;XM_021608524.1;XM_021613452.1;XM_021607588.1;XM_021596836.1;XM_021613455.1	7	288	350	14558	0.541976
4211	Longevity regulating pathway	XM_021608144.1	1	288	40	14558	0.550821
5220	Chronic myeloid leukemia	XM_021608524.1	1	288	40	14558	0.550821
4725	Cholinergic synapse	XM_021608144.1	1	288	41	14558	0.559731
531	Glycosaminoglycan degradation	XM_021569774.1	1	288	41	14558	0.559731
4971	Gastric acid secretion	XM_021608144.1	1	288	42	14558	0.568466
4970	Salivary secretion	XM_021608144.1	1	288	43	14558	0.577027
5030	Cocaine addiction	XM_021608144.1	1	288	43	14558	0.577027
760	Nicotinate and nicotinamide metabolism	XM_021563565.1	1	288	45	14558	0.593646
5203	Viral carcinogenesis	XM_021608144.1;XM_021606310.1;XM_021621480.1	3	288	158	14558	0.608096
20	Citrate cycle (TCA cycle)	XM_021620428.1	1	288	47	14558	0.609614
3320	PPAR signaling pathway	XM_021608456.1;XM_021618030.1;XM_021618029.1	3	288	160	14558	0.616614
4915	Estrogen signaling pathway	XM_021608144.1	1	288	48	14558	0.617362
5032	Morphine addiction	XM_021608144.1	1	288	48	14558	0.617362
4621	NOD-like receptor signaling pathway	XM_021575869.1;XM_021575870.1;XM_021565400.1	3	288	170	14558	0.657313
71	Fatty acid degradation	XM_021608456.1	1	288	54	14558	0.660736
4062	Chemokine signaling pathway	XM_021608144.1	1	288	55	14558	0.667472
3013	RNA transport	XM_021558858.1;XM_021579626.1;XM_021579625.1;XM_021568433.1;XM_021579627.1;XM_021564151.1	6	288	341	14558	0.670897
4922	Glucagon signaling pathway	XM_021608144.1	1	288	57	14558	0.680548
4146	Peroxisome	XM_021600517.1;XM_021600519.1;XM_021600518.1	3	288	177	14558	0.683905
4340	Hedgehog signaling pathway	XM_021608144.1;XM_021622743.1	2	288	119	14558	0.685702
5231	Choline metabolism in cancer	XM_021601783.1	1	288	59	14558	0.693112
5412	Arrhythmogenic right ventricular cardiomyopathy (ARVC)	XM_021588193.1;XM_021588194.1	2	288	121	14558	0.694494
4391	Hippo signaling pathway - fly	XM_021573862.1;XM_021585285.1	2	288	121	14558	0.694494
4912	GnRH signaling pathway	XM_021608144.1;XM_021575869.1;XM_021575870.1	3	288	180	14558	0.694823
4141	Protein processing in endoplasmic reticulum	XM_021575869.1;XM_021562657.1;XM_021565836.1;XM_021581710.1;NM_001160665.1;XM_021575870.1;XM_021591550.1	7	288	407	14558	0.698869
5223	Non-small cell lung cancer	XM_021574652.1	1	288	62	14558	0.71104
4142	Lysosome	XM_021607786.1;XM_021625861.1;XM_021609037.1;XM_021609810.1	4	288	243	14558	0.711891
4210	Apoptosis	XM_021581710.1	1	288	63	14558	0.716781
4726	Serotonergic synapse	XM_021608144.1	1	288	65	14558	0.727924
4742	Taste transduction	XM_021608144.1	1	288	65	14558	0.727924
4022	cGMP-PKG signaling pathway	XM_021612806.1	1	288	66	14558	0.73333
4010	MAPK signaling pathway	XM_021564151.1;XM_021625670.1;XM_021604369.1;XM_021604370.1;XM_021575870.1;XM_021622436.1;XM_021582078.1;XM_021575869.1;XM_021608144.1;XM_021558579.1;XM_021604368.1;XM_021560268.1;XM_021604367.1	13	288	754	14558	0.7344
4611	Platelet activation	XM_021608144.1	1	288	67	14558	0.73863
4723	Retrograde endocannabinoid signaling	XM_021608144.1	1	288	68	14558	0.743824
4976	Bile secretion	XM_021608144.1	1	288	68	14558	0.743824
562	Inositol phosphate metabolism	XM_021583487.1;XM_021583488.1;XM_021626149.1	3	288	195	14558	0.745161
4140	Autophagy - animal	XM_021598948.1	1	288	70	14558	0.753907
4978	Mineral absorption	XM_021572015.1	1	288	72	14558	0.763594
4014	Ras signaling pathway	XM_021601783.1;XM_021590090.1;XM_021608144.1	3	288	205	14558	0.774901
5010	Alzheimer disease	XM_021581710.1	1	288	76	14558	0.781843
4024	cAMP signaling pathway	XM_021608144.1	1	288	79	14558	0.794602
4114	Oocyte meiosis	XM_021598084.1;XM_021602164.1;XM_021608144.1	3	288	215	14558	0.801745
4727	GABAergic synapse	XM_021608144.1	1	288	81	14558	0.802692
4919	Thyroid hormone signaling pathway	XM_021608144.1	1	288	81	14558	0.802692
5166	Human T-cell leukemia virus 1 infection	XM_021606310.1;XM_021608144.1	2	288	151	14558	0.803464
590	Arachidonic acid metabolism	XM_021569971.1	1	288	82	14558	0.806617
5169	Epstein-Barr virus infection	XM_021608144.1	1	288	82	14558	0.806617
4330	Notch signaling pathway	XM_021563222.1;XM_021563221.1;XM_021571134.1	3	288	217	14558	0.806781
4350	TGF-beta signaling pathway	XM_021611530.1;XM_021571467.1;XM_021597795.1	3	288	220	14558	0.814133
4911	Insulin secretion	XM_021608144.1	1	288	84	14558	0.814236
600	Sphingolipid metabolism	XM_021580456.1	1	288	84	14558	0.814236
4728	Dopaminergic synapse	XM_021608144.1	1	288	88	14558	0.828587
5152	Tuberculosis	XM_021590085.1	1	288	89	14558	0.831998
1212	Fatty acid metabolism	XM_021608456.1	1	288	89	14558	0.831998
4920	Adipocytokine signaling pathway	XM_021575869.1;XM_021575870.1	2	288	178	14558	0.870554
230	Purine metabolism	XM_021589184.1;XM_021589183.1;XM_021569843.1;XM_021589185.1	4	288	317	14558	0.876692
4015	Rap1 signaling pathway	XM_021601783.1;XM_021590090.1	2	288	192	14558	0.896398
5205	Proteoglycans in cancer	XM_021608144.1	1	288	127	14558	0.921823
4540	Gap junction	XM_021571987.1;XM_021608144.1	2	288	223	14558	0.937512
5168	Herpes simplex virus 1 infection	XM_021600499.1;XM_021575870.1;XM_021575869.1;XM_021600509.1	4	288	383	14558	0.947655
240	Pyrimidine metabolism	XM_021569843.1	1	288	152	14558	0.952791
4360	Axon guidance	XM_021618527.1;XM_021616928.1;XM_021579726.1	3	288	320	14558	0.954448
4110	Cell cycle	XM_021577220.1;XM_021602164.1	2	288	255	14558	0.963473
4144	Endocytosis	XM_021622436.1;XM_021604370.1;XM_021591317.1;XM_021599831.1;XM_021598084.1;XM_021604367.1;XM_021604369.1;XM_021604368.1;XM_021611530.1;XM_021563463.1;XM_021620626.1	11	288	897	14558	0.970746
4145	Phagosome	XM_021590085.1;XM_021571987.1	2	288	273	14558	0.973147
564	Glycerophospholipid metabolism	XM_021570149.1	1	288	190	14558	0.978106
4020	Calcium signaling pathway	XM_021590387.1;XM_021608144.1;XM_021613853.1	3	288	381	14558	0.982197
4514	Cell adhesion molecules (CAMs)	XM_021563296.1;XM_021563299.1;XM_021591193.1;XM_021580419.1;XM_021563297.1	5	288	559	14558	0.987427
3015	mRNA surveillance pathway	XM_021558858.1	1	288	221	14558	0.98832
4080	Neuroactive ligand-receptor interaction	XM_021573956.1;XM_021613853.1;XM_021613634.1;XM_021596828.1	4	288	488	14558	0.988354
4512	ECM-receptor interaction	XM_021564884.1	1	288	227	14558	0.989659
4060	Cytokine-cytokine receptor interaction	XM_021602225.1	1	288	243	14558	0.992529
3040	Spliceosome	XM_021572233.1	1	288	258	14558	0.994493
4120	Ubiquitin mediated proteolysis	XM_021602164.1;XM_021622870.1	2	288	381	14558	0.99603
4520	Adherens junction	XM_021598084.1;XM_021611530.1	2	288	437	14558	0.998576

## Sheet: Cluster 24
pathway_id	pathway_name	Genes	S gene number	TS gene number	B gene number	TB gene number	pvalue
4310	Wnt signaling pathway	XM_021575900.1;XM_021603868.1;XM_021600072.1;XM_021575924.1;XM_021593527.1;XM_021575901.1;XM_021576209.1;XM_021602682.1;XM_021575909.1;XM_021558029.1;XM_021596024.1;XM_021575912.1;XM_021575904.1;XM_021575913.1;XM_021575897.1;XM_021586467.1;XM_021575911.1;XM_021604130.1;XM_021563323.1;XM_021609062.1;XM_021575894.1;XM_021613613.1;XM_021575917.1;XM_021602684.1;XM_021575902.1;XM_021571742.1;XM_021602…	61	754	393	14558	8.88178e-15
4916	Melanogenesis	XM_021575901.1;XM_021575903.1;XM_021575899.1;XM_021575924.1;XM_021563324.1;XM_021575895.1;XM_021618566.1;XM_021575904.1;XM_021609981.1;XM_021577430.1;XM_021575905.1;XM_021575906.1;XM_021589178.1;XM_021599035.1;XM_021575908.1;XM_021577431.1;XM_021599034.1;XM_021609980.1;XM_021575900.1;XM_021575902.1;XM_021575915.1;XM_021613613.1;XM_021563323.1;XM_021575898.1;XM_021575914.1;XM_021575912.1;XM_021575…	38	754	172	14558	1.58762e-14
4140	Autophagy - animal	XM_021613888.1;XM_021585872.1;XM_021585871.1;XM_021606979.1;XM_021606987.1;XM_021606978.1;XM_021620581.1;XM_021620583.1;XM_021606982.1;XM_021606986.1;XM_021606985.1;XM_021613889.1;XM_021620582.1;XM_021606980.1;XM_021585869.1;XM_021606981.1;XM_021606983.1;XM_021585870.1;XM_021585873.1	19	754	70	14558	1.55403e-09
533	Glycosaminoglycan biosynthesis - keratan sulfate	XM_021612931.1;XM_021612937.1;XM_021574958.1;XM_021612939.1;XM_021612928.1;XM_021612933.1;XM_021612929.1;XM_021612938.1;XM_021612934.1;XM_021612932.1;XM_021612935.1;XM_021612930.1;XM_021612936.1	13	754	53	14558	2.13473e-06
4142	Lysosome	XM_021585361.1;XM_021608224.1;XM_021579063.1;XM_021577158.1;XM_021585502.1;XM_021590554.1;XM_021564623.1;XM_021578979.1;XM_021590555.1;XM_021577157.1;XM_021561405.1;XM_021577160.1;XM_021584284.1;XM_021561404.1;XM_021584204.1;XM_021567904.1;XM_021606086.1;XM_021622581.1;XM_021561403.1;XM_021577159.1;XM_021605941.1;XM_021584205.1;XM_021558408.1;XM_021605940.1;XM_021564624.1;XM_021622582.1;XM_021567…	31	754	243	14558	3.19216e-06
5210	Colorectal cancer	XM_021605679.1;XM_021605678.1;XM_021605675.1;XM_021605676.1;XM_021576208.1;XM_021605674.1;XM_021576209.1;XM_021600978.1	8	754	20	14558	3.6036e-06
4932	Non-alcoholic fatty liver disease (NAFLD)	XM_021570110.1;XM_021581048.1;XM_021581046.1;XM_021570111.1;XM_021581045.1;XM_021581047.1;XM_021570109.1;XM_021609132.1;XM_021581049.1;XM_021581044.1	10	754	34	14558	5.51605e-06
3010	Ribosome	XM_021582540.1;XM_021582543.1;XM_021582544.1;XM_021624923.1;XM_021571625.1;XM_021561475.1;XM_021580158.1;XM_021582542.1;XM_021582541.1;XM_021617305.1;XM_021580480.1;XM_021599788.1;XM_021589267.1	13	754	58	14558	6.29815e-06
4340	Hedgehog signaling pathway	XM_021573447.1;XM_021583589.1;XM_021573417.1;XM_021573461.1;XM_021573408.1;XM_021613613.1;XM_021573428.1;XM_021589178.1;XM_021597475.1;XM_021573478.1;XM_021574116.1;XM_021573421.1;XM_021573437.1;XM_021573454.1;XM_021573399.1;XM_021558030.1;XM_021573469.1;XM_021558029.1;XM_021562436.1	19	754	119	14558	1.09549e-05
514	Other types of O-glycan biosynthesis	XM_021612934.1;XM_021612932.1;XM_021599715.1;XM_021612938.1;XM_021612931.1;XM_021557468.1;XM_021612930.1;XM_021612928.1;XM_021612929.1;XM_021612933.1;XM_021612939.1;XM_021576942.1;XM_021612935.1;XM_021612936.1;XM_021612937.1	15	754	84	14558	2.35664e-05
4144	Endocytosis	XM_021558213.1;XM_021573866.1;XM_021591501.1;XM_021604134.1;XM_021597448.1;XM_021623634.1;XM_021556736.1;XM_021569404.1;XM_021622389.1;XM_021610460.1;XM_021598968.1;XM_021587425.1;XM_021558530.1;XM_021622008.1;XM_021563100.1;XM_021557222.1;XM_021581838.1;XM_021558525.1;XM_021582928.1;XM_021581145.1;XM_021558537.1;XM_021587424.1;XM_021604124.1;XM_021617994.1;XM_021604114.1;XM_021604143.1;XM_021604…	75	754	897	14558	2.36706e-05
4672	Intestinal immune network for IgA production	XM_021569371.1;XM_021609851.1;XM_021596989.1;XM_021569367.1;XM_021569369.1;XM_021569366.1;XM_021569373.1;XM_021609850.1;XM_021569370.1;XM_021569368.1	10	754	43	14558	5.27967e-05
5212	Pancreatic cancer	XM_021605676.1;XM_021576208.1;XM_021605674.1;XM_021605675.1;XM_021605678.1;XM_021579628.1;XM_021576209.1;XM_021605679.1	8	754	29	14558	8.10089e-05
5166	Human T-cell leukemia virus 1 infection	XM_021603799.1;XM_021603805.1;XM_021603802.1;XM_021603803.1;XM_021600978.1;XM_021588715.1;XM_021603800.1;XM_021603812.1;XM_021603806.1;XM_021603810.1;XM_021568171.1;XM_021588716.1;XM_021603804.1;XM_021610954.1;XM_021580280.1;XM_021603801.1;XM_021603809.1;XM_021603811.1;XM_021603807.1;XM_021603798.1	20	754	151	14558	0.000103073
592	alpha-Linolenic acid metabolism	XM_021598602.1;XM_021598607.1;XM_021598601.1;XM_021598605.1;XM_021598603.1;XM_021598604.1	6	754	17	14558	0.000143136
1200	Carbon metabolism	XM_021585875.1;XM_021623372.1;XM_021576125.1;XM_021576123.1;XM_021600693.1;XM_021582498.1;XM_021557203.1;XM_021623369.1;XM_021557204.1;XM_021623370.1;XM_021576130.1;XM_021623371.1;XM_021558013.1;XM_021600876.1;XM_021570525.1;XM_021576131.1;XM_021566515.1;XM_021585874.1;XM_021576126.1;XM_021623373.1;XM_021576127.1;XM_021623374.1	22	754	182	14558	0.000185566
3320	PPAR signaling pathway	XM_021619047.1;XM_021581045.1;XM_021599099.1;XM_021581507.1;XM_021611178.1;XM_021581048.1;XM_021603953.1;XM_021581508.1;XM_021598607.1;XM_021599102.1;XM_021598601.1;XM_021581044.1;XM_021598604.1;XM_021598605.1;XM_021581049.1;XM_021603954.1;XM_021598602.1;XM_021598603.1;XM_021581047.1;XM_021581046.1	20	754	160	14558	0.000228829
4350	TGF-beta signaling pathway	XM_021609172.1;XM_021574116.1;XM_021562199.1;XM_021571164.1;XM_021579158.1;XM_021597034.1;XM_021597031.1;XM_021609179.1;XM_021579157.1;XM_021569270.1;XM_021562198.1;XM_021600072.1;XM_021579160.1;XM_021562656.1;XM_021597032.1;XM_021579601.1;XM_021557222.1;XM_021579161.1;XM_021597030.1;XM_021610460.1;XM_021571165.1;XM_021609062.1;XM_021579159.1;XM_021598500.1	24	754	220	14558	0.000458443
5231	Choline metabolism in cancer	XM_021605679.1;XM_021605675.1;XM_021605678.1;XM_021605676.1;XM_021605674.1;XM_021600978.1;XM_021576208.1;XM_021576209.1;XM_021571165.1;XM_021571164.1	10	754	59	14558	0.000818177
630	Glyoxylate and dicarboxylate metabolism	XM_021585875.1;XM_021576131.1;XM_021600693.1;XM_021576127.1;XM_021576125.1;XM_021585874.1;XM_021576123.1;XM_021582498.1;XM_021558013.1;XM_021576126.1;XM_021576130.1	11	754	70	14558	0.000881768
4510	Focal adhesion	XM_021576209.1;XM_021602197.1;XM_021600072.1;XM_021602721.1;XM_021620605.1;XM_021602196.1;XM_021578705.1;XM_021602711.1;XM_021621754.1;XM_021613706.1;XM_021602194.1;XM_021576208.1;XM_021588694.1;XM_021609823.1;XM_021596911.1;XM_021569404.1;XM_021620604.1;XM_021609825.1;XM_021585072.1;XM_021602192.1;XM_021625371.1;XM_021574065.1;XM_021613694.1;XM_021600279.1;XM_021602193.1;XM_021602198.1;XM_021586…	50	754	619	14558	0.00118824
30	Pentose phosphate pathway	XM_021557204.1;XM_021623373.1;XM_021623371.1;XM_021623372.1;XM_021623374.1;XM_021557203.1;XM_021623369.1;XM_021623370.1	8	754	44	14558	0.00168192
4068	FoxO signaling pathway	XM_021625370.1;XM_021591456.1;XM_021602191.1;XM_021602192.1;XM_021566330.1;XM_021561802.1;XM_021613706.1;XM_021617042.1;XM_021602194.1;XM_021566167.1;XM_021558030.1;XM_021579601.1;XM_021588062.1;XM_021602197.1;XM_021567099.1;XM_021567690.1;NM_001160533.1;XM_021608390.1;XM_021617640.1;XM_021567705.1;XM_021616257.1;XM_021621801.1;XM_021621800.1;XM_021566250.1;XM_021561176.1;XM_021625371.1;XM_021621…	36	754	418	14558	0.00193531
1212	Fatty acid metabolism	XM_021598603.1;XM_021603953.1;XM_021619047.1;XM_021598607.1;XM_021599099.1;XM_021603954.1;XM_021598604.1;XM_021598602.1;XM_021598605.1;XM_021598601.1;XM_021600693.1;XM_021599102.1	12	754	89	14558	0.00206739
4520	Adherens junction	XM_021575894.1;XM_021575902.1;XM_021575913.1;XM_021576209.1;XM_021575910.1;XM_021575908.1;XM_021581838.1;XM_021621616.1;XM_021600072.1;XM_021575903.1;XM_021575911.1;XM_021575897.1;XM_021575906.1;XM_021621610.1;XM_021575924.1;XM_021569404.1;XM_021575904.1;XM_021575898.1;XM_021600279.1;XM_021609516.1;XM_021575901.1;XM_021575914.1;XM_021579601.1;XM_021575909.1;XM_021603309.1;XM_021609823.1;XM_021575…	37	754	437	14558	0.00226499
4922	Glucagon signaling pathway	XM_021599854.1;XM_021612818.1;XM_021599852.1;XM_021579885.1;XM_021568171.1;XM_021612827.1;XM_021599851.1;XM_021579886.1;XM_021612803.1	9	754	57	14558	0.00245888
4072	Phospholipase D signaling pathway	XM_021605678.1;XM_021605679.1;XM_021605675.1;XM_021605674.1;XM_021605676.1;XM_021579628.1;XM_021611242.1	7	754	38	14558	0.00300474
4150	mTOR signaling pathway	XM_021602193.1;XM_021602197.1;XM_021582186.1;XM_021569274.1;XM_021621800.1;XM_021602198.1;XM_021621801.1;XM_021602191.1;XM_021596867.1;XM_021608873.1;XM_021613888.1;XM_021608391.1;XM_021561449.1;XM_021608390.1;XM_021602192.1;XM_021602194.1;XM_021621802.1;XM_021602196.1;XM_021613706.1;XM_021613889.1;XM_021596866.1	21	754	218	14558	0.00461631
4728	Dopaminergic synapse	XM_021600978.1;XM_021604143.1;XM_021604134.1;XM_021617219.1;XM_021604172.1;XM_021604163.1;XM_021597511.1;XM_021604153.1;XM_021604114.1;XM_021604124.1;XM_021617177.1	11	754	88	14558	0.00562556
982	Drug metabolism - cytochrome P450	XM_021604213.1;XM_021567028.1;XM_021604216.1;XM_021604215.1;XM_021604214.1	5	754	23	14558	0.00567539
1040	Biosynthesis of unsaturated fatty acids	XM_021598603.1;XM_021598605.1;XM_021598604.1;XM_021598601.1;XM_021598607.1;XM_021598602.1	6	754	36	14558	0.0097374
4920	Adipocytokine signaling pathway	XM_021599102.1;XM_021581047.1;XM_021603954.1;XM_021602892.1;XM_021599099.1;XM_021621801.1;XM_021621800.1;XM_021581045.1;XM_021581049.1;XM_021602372.1;XM_021581046.1;XM_021603953.1;XM_021581044.1;XM_021581048.1;XM_021619047.1;XM_021621802.1;NM_001146168.1	17	754	178	14558	0.0110282
280	Valine, leucine and isoleucine degradation	XM_021625516.1;XM_021599282.1;XM_021600693.1;XM_021599283.1;XM_021599281.1;XM_021562052.1;XM_021600876.1	7	754	48	14558	0.0112207
4261	Adrenergic signaling in cardiomyocytes	XM_021602193.1;XM_021599032.1;XM_021575565.1;XM_021602196.1;XM_021599035.1;XM_021602191.1;XM_021609981.1;XM_021564037.1;XM_021610377.1;XM_021602197.1;XM_021610376.1;XM_021602192.1;XM_021609980.1;XM_021621276.1;XM_021602198.1;XM_021577430.1;XM_021577431.1;XM_021562849.1;XM_021574251.1;XM_021599034.1;XM_021618566.1;XM_021597248.1;XM_021610380.1;XM_021613706.1;XM_021622081.1;XM_021560283.1;XM_021602…	28	754	348	14558	0.0139982
790	Folate biosynthesis	XM_021585665.1;XM_021601761.1;XM_021569498.1;XM_021569497.1	4	754	19	14558	0.0148412
5202	Transcriptional misregulation in cancer	XM_021609132.1;XM_021603803.1;XM_021557607.1;XM_021571164.1;XM_021603811.1;XM_021603807.1;XM_021611177.1;XM_021603801.1;XM_021603806.1;XM_021623469.1;XM_021570110.1;XM_021603805.1;XM_021603799.1;XM_021603804.1;XM_021603812.1;XM_021561055.1;XM_021568166.1;XM_021571165.1;XM_021623478.1;XM_021603802.1;XM_021603800.1;XM_021603810.1;XM_021603798.1;XM_021570109.1;XM_021603809.1;XM_021568165.1;XM_021561…	28	754	350	14558	0.0150121
4620	Toll-like receptor signaling pathway	XM_021557504.1;XM_021621802.1;XM_021602198.1;XM_021621800.1;XM_021613694.1;XM_021602194.1;XM_021602196.1;XM_021589099.1;XM_021613706.1;XM_021602193.1;XM_021602192.1;XM_021578937.1;XM_021600978.1;XM_021602197.1;XM_021621801.1;XM_021602191.1	16	754	170	14558	0.0152421
4210	Apoptosis	XM_021570109.1;XM_021577716.1;XM_021577715.1;XM_021570111.1;XM_021570110.1;XM_021609132.1;XM_021600978.1;XM_021559400.1	8	754	63	14558	0.0155594
4370	VEGF signaling pathway	XM_021568171.1;XM_021576208.1;XM_021613706.1;XM_021581838.1;XM_021602198.1;XM_021566810.1;XM_021576209.1;XM_021602191.1;XM_021602193.1;XM_021602196.1;XM_021602197.1;XM_021566809.1;XM_021602192.1;XM_021602194.1;XM_021609825.1;XM_021569404.1;XM_021609823.1	17	754	185	14558	0.0157106
4211	Longevity regulating pathway	XM_021581045.1;XM_021581044.1;XM_021581049.1;XM_021581046.1;XM_021581047.1;XM_021581048.1	6	754	40	14558	0.0161211
1230	Biosynthesis of amino acids	XM_021623374.1;XM_021557203.1;XM_021570525.1;XM_021623370.1;XM_021623369.1;XM_021558013.1;XM_021623372.1;XM_021623373.1;XM_021623371.1;XM_021625516.1;XM_021557204.1	11	754	103	14558	0.017505
4022	cGMP-PKG signaling pathway	XM_021598107.1;XM_021568171.1;XM_021598137.1;XM_021598113.1;XM_021598145.1;XM_021598153.1;XM_021598122.1;XM_021598130.1	8	754	66	14558	0.0201723
4152	AMPK signaling pathway	XM_021569145.1;XM_021581047.1;XM_021581045.1;XM_021589655.1;XM_021581049.1;XM_021581046.1;XM_021581048.1;XM_021606685.1;XM_021581044.1	9	754	80	14558	0.0222018
4933	AGE-RAGE signaling pathway in diabetic complications	XM_021602196.1;XM_021596031.1;XM_021602191.1;XM_021591497.1;XM_021609825.1;XM_021602198.1;XM_021609823.1;XM_021581838.1;XM_021579601.1;XM_021613694.1;XM_021602194.1;XM_021596024.1;XM_021602193.1;XM_021589099.1;XM_021602192.1;XM_021613706.1;XM_021569404.1;XM_021588062.1;XM_021602197.1;XM_021571742.1	20	754	238	14558	0.0227648
4912	GnRH signaling pathway	XM_021609823.1;XM_021599035.1;XM_021609825.1;XM_021569404.1;XM_021599034.1;XM_021602491.1;XM_021625370.1;XM_021602481.1;XM_021618566.1;XM_021625371.1;XM_021613694.1;XM_021599032.1;XM_021602523.1;XM_021601785.1;XM_021581838.1;XM_021589099.1	16	754	180	14558	0.0247313
61	Fatty acid biosynthesis	XM_021599102.1;XM_021599099.1;XM_021603954.1;XM_021603953.1;XM_021619047.1	5	754	35	14558	0.0329187
3015	mRNA surveillance pathway	XM_021624232.1;NM_001165227.1;XM_021571876.1;XM_021580531.1;XM_021558086.1;XM_021624234.1;XM_021600818.1;XM_021561475.1;XM_021615980.1;XM_021574251.1;XM_021621276.1;XM_021624231.1;XM_021624233.1;XM_021563446.1;XM_021624230.1;XM_021558083.1;XM_021558084.1;XM_021558085.1	18	754	221	14558	0.0385976
4015	Rap1 signaling pathway	XM_021579102.1;XM_021605678.1;XM_021579097.1;XM_021576208.1;XM_021579099.1;XM_021605675.1;XM_021579101.1;XM_021579100.1;XM_021579628.1;XM_021605676.1;XM_021597511.1;XM_021605679.1;XM_021579096.1;XM_021605674.1;XM_021576209.1;XM_021579095.1	16	754	192	14558	0.0412938
4713	Circadian entrainment	XM_021600978.1;XM_021617177.1;XM_021597511.1;XM_021617219.1;XM_021597248.1	5	754	38	14558	0.0448891
4662	B cell receptor signaling pathway	XM_021600694.1;XM_021600978.1;XM_021568171.1;XM_021576209.1;XM_021576208.1	5	754	39	14558	0.0493858
4630	Jak-STAT signaling pathway	XM_021602892.1;XM_021608186.1;XM_021613706.1;XM_021602192.1;XM_021562283.1;XM_021558214.1;XM_021602196.1;XM_021602191.1;XM_021602193.1;XM_021597448.1;XM_021558213.1;XM_021558215.1;NM_001146168.1;XM_021602197.1;XM_021605197.1;XM_021602198.1;XM_021609062.1;XM_021625371.1;XM_021602194.1;XM_021625370.1;XM_021558212.1	21	754	276	14558	0.0503586
4141	Protein processing in endoplasmic reticulum	XM_021581074.1;XM_021570109.1;XM_021609132.1;XM_021568914.1;XM_021602372.1;XM_021612906.1;XM_021562208.1;XM_021615603.1;XM_021573009.1;XM_021602282.1;NM_001165041.1;XM_021611282.1;XM_021585101.1;XM_021572200.1;XM_021608685.1;XM_021579370.1;XM_021585100.1;XM_021574937.1;XM_021618795.1;XM_021570110.1;XM_021570111.1;XM_021572201.1;XM_021562842.1;XM_021612054.1;XM_021610176.1;XM_021609847.1;XM_021588…	29	754	407	14558	0.051092
3008	Ribosome biogenesis in eukaryotes	XM_021613101.1;XM_021613099.1;XM_021587747.1;XM_021587746.1;XM_021613102.1;XM_021581828.1;XM_021613100.1	7	754	66	14558	0.0537961
4611	Platelet activation	XM_021579095.1;XM_021579101.1;XM_021579100.1;XM_021579099.1;XM_021579102.1;XM_021579096.1;XM_021579097.1	7	754	67	14558	0.0575166
4550	Signaling pathways regulating pluripotency of stem cells	XM_021603807.1;XM_021603805.1;XM_021603806.1;XM_021603809.1;XM_021568166.1;XM_021603803.1;XM_021603800.1;XM_021603811.1;XM_021603802.1;XM_021603801.1;XM_021575482.1;XM_021603804.1;XM_021603812.1;XM_021603799.1;XM_021568165.1;XM_021603810.1;XM_021603798.1	17	754	217	14558	0.0586576
71	Fatty acid degradation	XM_021603953.1;XM_021600693.1;XM_021599102.1;XM_021599099.1;XM_021619047.1;XM_021603954.1	6	754	54	14558	0.0593856
232	Caffeine metabolism	XM_021570675.1;XM_021610960.1	2	754	8	14558	0.0609334
3060	Protein export	XM_021582842.1;XM_021612770.1	2	754	8	14558	0.0609334
640	Propanoate metabolism	XM_021562052.1;XM_021566515.1;XM_021600693.1;XM_021600876.1	4	754	30	14558	0.0672372
4530	Tight junction	XM_021583875.1;XM_021597362.1;XM_021621610.1;XM_021580531.1;XM_021579356.1;XM_021597361.1;XM_021563987.1;XM_021610460.1;XM_021558158.1;XM_021558160.1;XM_021600072.1;XM_021609825.1;XM_021621616.1;XM_021563986.1;XM_021583873.1;XM_021597366.1;XM_021625931.1;XM_021580010.1;XM_021583876.1;XM_021597742.1;XM_021609823.1;XM_021609980.1;XM_021569404.1;XM_021568314.1;XM_021597741.1;XM_021583874.1;XM_021597…	33	754	488	14558	0.0707196
4110	Cell cycle	XM_021603806.1;XM_021603801.1;XM_021603811.1;XM_021603805.1;XM_021603807.1;XM_021564280.1;XM_021603803.1;XM_021609062.1;XM_021603810.1;XM_021603799.1;XM_021565840.1;XM_021603812.1;XM_021623900.1;XM_021603802.1;XM_021603798.1;XM_021603804.1;XM_021603800.1;XM_021623901.1;XM_021603809.1	19	754	255	14558	0.0711799
4940	Type I diabetes mellitus	XM_021615238.1;XM_021590603.1	2	754	9	14558	0.0757173
4060	Cytokine-cytokine receptor interaction	XM_021579160.1;XM_021579157.1;XM_021569270.1;XM_021597031.1;XM_021597032.1;XM_021601421.1;XM_021579601.1;XM_021574116.1;XM_021609179.1;XM_021579159.1;XM_021590749.1;XM_021597030.1;XM_021605197.1;XM_021579161.1;XM_021609172.1;XM_021579158.1;XM_021597034.1;XM_021596989.1	18	754	243	14558	0.0808451
4070	Phosphatidylinositol signaling system	XM_021620816.1;XM_021577257.1;XM_021562208.1;XM_021600490.1;XM_021600491.1;XM_021606340.1;XM_021602191.1;XM_021620387.1;XM_021618566.1;XM_021613706.1;XM_021602198.1;XM_021619708.1;NM_001165041.1;XM_021620817.1;XM_021600492.1;XM_021602194.1;XM_021602193.1;XM_021602197.1;XM_021602192.1;XM_021565200.1;XM_021602196.1	21	754	295	14558	0.0872693
4650	Natural killer cell mediated cytotoxicity	XM_021568171.1;XM_021576208.1;XM_021576209.1;XM_021600694.1	4	754	33	14558	0.0890897
4623	Cytosolic DNA-sensing pathway	XM_021625142.1;XM_021621800.1;XM_021621801.1;XM_021625143.1;XM_021625140.1;XM_021621802.1	6	754	61	14558	0.0948963
240	Pyrimidine metabolism	XM_021605939.1;XM_021625142.1;XM_021584868.1;XM_021625140.1;XM_021556913.1;XM_021618235.1;XM_021556911.1;XM_021605940.1;XM_021605941.1;XM_021556912.1;XM_021625143.1;NM_001160697.1	12	754	152	14558	0.0960883
130	Ubiquinone and other terpenoid-quinone biosynthesis	XM_021591093.1	1	754	2	14558	0.100907
3018	RNA degradation	XM_021571876.1;XM_021624336.1;XM_021613101.1;XM_021613102.1;XM_021624345.1;XM_021618911.1;XM_021613099.1;XM_021624351.1;XM_021558084.1;XM_021618910.1;XM_021558083.1;XM_021567067.1;XM_021625145.1;XM_021613100.1;XM_021558085.1;XM_021558086.1	16	754	219	14558	0.104515
4930	Type II diabetes mellitus	XM_021581046.1;XM_021581047.1;XM_021581044.1;XM_021581045.1;XM_021581049.1;XM_021581048.1	6	754	64	14558	0.112948
4977	Vitamin digestion and absorption	XM_021606271.1;XM_021606270.1;XM_021562280.1;XM_021606272.1	4	754	36	14558	0.113902
4024	cAMP signaling pathway	XM_021600694.1;XM_021600978.1;XM_021564923.1;XM_021597248.1;XM_021576209.1;XM_021576208.1;NM_001124179.1	7	754	79	14558	0.114281
532	Glycosaminoglycan biosynthesis - chondroitin sulfate / dermatan sulfate	XM_021570449.1;XM_021610611.1;XM_021556886.1;XM_021561801.1;XM_021610610.1	5	754	50	14558	0.115412
4668	TNF signaling pathway	XM_021601785.1;XM_021602523.1;XM_021602491.1;XM_021600978.1;XM_021602481.1	5	754	52	14558	0.130485
4961	Endocrine and other factor-regulated calcium reabsorption	XM_021587425.1;XM_021587424.1	2	754	13	14558	0.143378
230	Purine metabolism	XM_021556913.1;XM_021610960.1;XM_021605940.1;XM_021570675.1;XM_021623372.1;XM_021625142.1;XM_021556911.1;XM_021623373.1;XM_021623371.1;XM_021605939.1;XM_021557204.1;XM_021556912.1;XM_021611242.1;XM_021623374.1;XM_021625143.1;XM_021605941.1;XM_021557203.1;XM_021623370.1;XM_021584868.1;XM_021623369.1;XM_021625140.1	21	754	317	14558	0.148052
4664	Fc epsilon RI signaling pathway	XM_021600694.1;XM_021576208.1;XM_021576209.1	3	754	26	14558	0.149377
4725	Cholinergic synapse	XM_021600978.1;XM_021597511.1;XM_021617177.1;XM_021617219.1	4	754	41	14558	0.161012
531	Glycosaminoglycan degradation	XM_021598833.1;XM_021590555.1;XM_021590554.1;XM_021567266.1	4	754	41	14558	0.161012
5031	Amphetamine addiction	XM_021568171.1;XM_021600978.1	2	754	14	14558	0.161802
4145	Phagosome	XM_021626031.1;XM_021620608.1;XM_021592297.1;XM_021557713.1;XM_021584204.1;XM_021620604.1;XM_021581397.1;XM_021574065.1;XM_021584203.1;XM_021608390.1;XM_021582928.1;XM_021620606.1;XM_021608391.1;XM_021621439.1;XM_021620605.1;XM_021584205.1;XM_021574002.1;XM_021581396.1	18	754	273	14558	0.175208
4810	Regulation of actin cytoskeleton	XM_021576209.1;XM_021601421.1;XM_021620604.1;XM_021600694.1;XM_021602197.1;XM_021623634.1;XM_021602192.1;XM_021602198.1;XM_021574822.1;XM_021620605.1;XM_021624570.1;XM_021569404.1;XM_021609823.1;XM_021621276.1;XM_021585072.1;XM_021562849.1;XM_021590830.1;XM_021563493.1;XM_021600072.1;XM_021620606.1;XM_021602191.1;XM_021609825.1;XM_021610460.1;XM_021598500.1;XM_021602194.1;XM_021621610.1;XM_021613…	39	754	648	14558	0.183803
290	Valine, leucine and isoleucine biosynthesis	XM_021625516.1	1	754	4	14558	0.191643
5131	Shigellosis	XM_021618795.1	1	754	4	14558	0.191643
4512	ECM-receptor interaction	XM_021581396.1;XM_021620608.1;XM_021578705.1;XM_021581397.1;XM_021596911.1;XM_021620606.1;XM_021620605.1;XM_021588694.1;XM_021608825.1;XM_021570150.1;XM_021624570.1;XM_021574065.1;XM_021620604.1;XM_021557505.1;XM_021609100.1	15	754	227	14558	0.199626
1210	2-Oxocarboxylic acid metabolism	XM_021625516.1;XM_021570525.1;XM_021558013.1	3	754	30	14558	0.201491
760	Nicotinate and nicotinamide metabolism	XM_021556913.1;XM_021556911.1;XM_021556912.1;XM_021620680.1	4	754	45	14558	0.202928
4012	ErbB signaling pathway	XM_021590830.1;XM_021602198.1;XM_021613706.1;XM_021602193.1;XM_021613694.1;XM_021588062.1;XM_021625370.1;XM_021625371.1;XM_021621754.1;XM_021602191.1;XM_021602194.1;XM_021602197.1;XM_021609062.1;XM_021589099.1;XM_021602192.1;XM_021602196.1	16	754	246	14558	0.207101
5416	Viral myocarditis	XM_021582821.1;XM_021576208.1;XM_021582822.1;XM_021585299.1;XM_021576209.1	5	754	63	14558	0.226731
4213	Longevity regulating pathway - multiple species	XM_021567099.1;XM_021603939.1;XM_021561802.1	3	754	32	14558	0.22896
750	Vitamin B6 metabolism	XM_021603223.1	1	754	5	14558	0.233522
4915	Estrogen signaling pathway	XM_021571165.1;XM_021571164.1;XM_021597511.1;XM_021600978.1	4	754	48	14558	0.236233
3430	Mismatch repair	XM_021577430.1;XM_021577431.1	2	754	18	14558	0.238554
4931	Insulin resistance	XM_021577431.1;XM_021608391.1;NM_001165227.1;NM_001146168.1;XM_021602194.1;XM_021613706.1;XM_021602198.1;XM_021615980.1;XM_021602892.1;XM_021603309.1;XM_021608390.1;XM_021577430.1;XM_021621800.1;XM_021621801.1;XM_021602192.1;XM_021602196.1;XM_021622081.1;XM_021567099.1;XM_021602191.1;XM_021602197.1;XM_021600818.1;XM_021588062.1;XM_021602193.1;XM_021621802.1;XM_021561802.1;XM_021621276.1	26	754	435	14558	0.251358
400	Phenylalanine, tyrosine and tryptophan biosynthesis	XM_021570525.1	1	754	6	14558	0.273233
5200	Pathways in cancer	XM_021605675.1;XM_021557607.1;XM_021611177.1;XM_021617177.1;XM_021579628.1;XM_021605674.1;NM_001124710.1;XM_021582546.1;XM_021605678.1;XM_021600978.1;XM_021617219.1;XM_021605676.1;XM_021576209.1;XM_021576208.1;XM_021605679.1	15	754	246	14558	0.294166
5142	Chagas disease (American trypanosomiasis)	XM_021600978.1;XM_021597511.1	2	754	21	14558	0.297242
450	Selenocompound metabolism	NM_001160697.1;XM_021577629.1	2	754	21	14558	0.297242
4710	Circadian rhythm	XM_021560024.1;XM_021568730.1	2	754	21	14558	0.297242
601	Glycosphingolipid biosynthesis - lacto and neolacto series	XM_021612928.1;XM_021612934.1;XM_021612931.1;XM_021612929.1;XM_021612937.1;XM_021612939.1;XM_021612935.1;XM_021612938.1;XM_021612933.1;XM_021612932.1;XM_021612936.1;XM_021612930.1	12	754	193	14558	0.298846
4722	Neurotrophin signaling pathway	XM_021623900.1;XM_021623901.1;XM_021603847.1	3	754	37	14558	0.299968
5204	Chemical carcinogenesis	NM_001124710.1	1	754	7	14558	0.31089
4720	Long-term potentiation	XM_021568171.1	1	754	7	14558	0.31089
3013	RNA transport	XM_021558086.1;XM_021561475.1;XM_021558085.1;XM_021563446.1;XM_021582590.1;XM_021558084.1;XM_021587746.1;XM_021567906.1;XM_021568794.1;XM_021558083.1;NM_001165193.1;XM_021570138.1;XM_021587747.1;XM_021604016.1;XM_021571876.1;XM_021616172.1;XM_021613577.1;XM_021567904.1;XM_021582591.1;XM_021608513.1	20	754	341	14558	0.314751
4122	Sulfur relay system	XM_021585665.1;XM_021565044.1	2	754	22	14558	0.316703
5016	Huntington disease	XM_021571164.1;XM_021587424.1;XM_021571165.1;XM_021587425.1;XM_021574000.1	5	754	72	14558	0.316781
4330	Notch signaling pathway	XM_021603868.1;XM_021577656.1;XM_021611087.1;XM_021624359.1;XM_021611088.1;XM_021601607.1;XM_021624358.1;XM_021581314.1;XM_021568217.1;XM_021563324.1;XM_021624357.1;XM_021563323.1;XM_021603869.1	13	754	217	14558	0.334708
5221	Acute myeloid leukemia	XM_021611177.1;XM_021557607.1	2	754	23	14558	0.336035
4724	Glutamatergic synapse	XM_021568171.1;XM_021597511.1;XM_021617219.1;XM_021560597.1;XM_021617177.1	5	754	74	14558	0.337473
4390	Hippo signaling pathway	XM_021599784.1;XM_021599786.1;XM_021623901.1;XM_021599785.1;XM_021623900.1;XM_021599783.1;XM_021621834.1;XM_021599109.1;XM_021621831.1;XM_021621833.1;XM_021599108.1	11	754	182	14558	0.343157
5140	Leishmaniasis	XM_021600978.1	1	754	8	14558	0.346598
4670	Leukocyte transendothelial migration	XM_021621616.1;XM_021600694.1;XM_021621610.1	3	754	41	14558	0.357577
5132	Salmonella infection	XM_021589099.1;XM_021598500.1;XM_021600978.1;XM_021609823.1;XM_021613694.1;XM_021625931.1;XM_021581838.1;XM_021585072.1;XM_021569404.1;XM_021609825.1	10	754	169	14558	0.378941
360	Phenylalanine metabolism	XM_021570525.1	1	754	9	14558	0.380458
4010	MAPK signaling pathway	XM_021621800.1;XM_021596024.1;XM_021576208.1;XM_021563493.1;XM_021572808.1;XM_021609823.1;XM_021621801.1;XM_021598775.1;XM_021625370.1;XM_021570111.1;XM_021566809.1;XM_021568274.1;XM_021609825.1;XM_021588062.1;XM_021581838.1;XM_021596031.1;XM_021570110.1;XM_021570109.1;XM_021609062.1;XM_021621802.1;XM_021579601.1;XM_021589099.1;XM_021590830.1;XM_021623634.1;XM_021557504.1;XM_021610792.1;XM_021602…	41	754	754	14558	0.395282
511	Other glycan degradation	XM_021590554.1;XM_021590555.1	2	754	27	14558	0.411372
4380	Osteoclast differentiation	XM_021600978.1;XM_021568171.1	2	754	27	14558	0.411372
4071	Sphingolipid signaling pathway	XM_021576208.1;XM_021576209.1	2	754	27	14558	0.411372
480	Glutathione metabolism	XM_021567028.1;XM_021567967.1;XM_021567966.1;XM_021604546.1	4	754	64	14558	0.42487
350	Tyrosine metabolism	XM_021570525.1;XM_021586735.1	2	754	28	14558	0.429563
5012	Parkinson disease	XM_021577715.1;XM_021577716.1	2	754	28	14558	0.429563
770	Pantothenate and CoA biosynthesis	XM_021625516.1	1	754	11	14558	0.443012
4910	Insulin signaling pathway	NM_001146168.1;XM_021602198.1;XM_021618566.1;XM_021621754.1;XM_021602191.1;XM_021621802.1;XM_021588751.1;XM_021602192.1;XM_021625371.1;XM_021621800.1;XM_021613706.1;XM_021602193.1;XM_021621801.1;XM_021603309.1;XM_021592836.1;XM_021621276.1;XM_021625370.1;XM_021602194.1;XM_021602197.1;XM_021602196.1;XM_021569274.1;XM_021590830.1	22	754	406	14558	0.444741
5146	Amoebiasis	XM_021621610.1;XM_021621616.1	2	754	29	14558	0.447452
5032	Morphine addiction	XM_021597511.1;XM_021617219.1;XM_021617177.1	3	754	48	14558	0.456108
330	Arginine and proline metabolism	XM_021570525.1;XM_021564870.1;XM_021620352.1	3	754	48	14558	0.456108
4215	Apoptosis - multiple species	XM_021588062.1;XM_021577716.1;XM_021577715.1	3	754	49	14558	0.469706
5323	Rheumatoid arthritis	XM_021600978.1	1	754	12	14558	0.471882
3030	DNA replication	XM_021577430.1;XM_021577431.1	2	754	31	14558	0.482254
4014	Ras signaling pathway	XM_021621385.1;XM_021605679.1;XM_021579628.1;XM_021617219.1;XM_021576209.1;XM_021605676.1;XM_021617177.1;XM_021605675.1;XM_021605678.1;XM_021605674.1;XM_021576208.1	11	754	205	14558	0.496267
534	Glycosaminoglycan biosynthesis - heparan sulfate / heparin	XM_021556886.1;XM_021561801.1;XM_021570449.1	3	754	51	14558	0.496426
4917	Prolactin signaling pathway	XM_021600978.1	1	754	13	14558	0.499257
900	Terpenoid backbone biosynthesis	XM_021600693.1	1	754	13	14558	0.499257
270	Cysteine and methionine metabolism	XM_021565044.1;XM_021570525.1;XM_021590680.1;XM_021625516.1	4	754	71	14558	0.505202
4921	Oxytocin signaling pathway	XM_021597511.1;XM_021597248.1;XM_021568171.1;XM_021600978.1	4	754	71	14558	0.505202
3440	Homologous recombination	XM_021577430.1;XM_021577431.1	2	754	33	14558	0.515669
520	Amino sugar and nucleotide sugar metabolism	XM_021616207.1;XM_021590555.1;XM_021590554.1	3	754	53	14558	0.522453
970	Aminoacyl-tRNA biosynthesis	XM_021577629.1;XM_021625805.1	2	754	34	14558	0.531831
260	Glycine, serine and threonine metabolism	XM_021590680.1;XM_021623022.1	2	754	35	14558	0.547622
604	Glycosphingolipid biosynthesis - ganglio series	XM_021590554.1;XM_021590555.1	2	754	35	14558	0.547622
4062	Chemokine signaling pathway	XM_021600694.1;XM_021617177.1;XM_021617219.1	3	754	55	14558	0.547726
920	Sulfur metabolism	XM_021565044.1	1	754	16	14558	0.573169
3020	RNA polymerase	XM_021625142.1;XM_021625140.1;XM_021625143.1	3	754	58	14558	0.584121
512	Mucin type O-glycan biosynthesis	XM_021581330.1;XM_021576310.1	2	754	38	14558	0.592717
410	beta-Alanine metabolism	XM_021600876.1	1	754	17	14558	0.5953
4711	Circadian rhythm - fly	XM_021625459.1	1	754	17	14558	0.5953
5211	Renal cell carcinoma	NM_001124710.1	1	754	17	14558	0.5953
4660	T cell receptor signaling pathway	XM_021568171.1;XM_021600978.1;XM_021600694.1	3	754	59	14558	0.59583
4740	Olfactory transduction	XM_021611519.1;XM_021611518.1;XM_021611520.1;XM_021611521.1	4	754	80	14558	0.600351
4391	Hippo signaling pathway - fly	XM_021573105.1;XM_021560985.1;XM_021565671.1;XM_021572217.1;XM_021560979.1;XM_021580605.1	6	754	121	14558	0.602154
5412	Arrhythmogenic right ventricular cardiomyopathy (ARVC)	XM_021585299.1;XM_021621616.1;XM_021597248.1;XM_021621610.1;XM_021559400.1;XM_021557607.1	6	754	121	14558	0.602154
4914	Progesterone-mediated oocyte maturation	XM_021602198.1;XM_021609981.1;XM_021602196.1;XM_021609980.1;XM_021602191.1;XM_021602192.1;XM_021602194.1;XM_021602193.1;XM_021613706.1;XM_021602197.1	10	754	202	14558	0.604221
4540	Gap junction	XM_021609981.1;XM_021601421.1;XM_021609980.1;XM_021625370.1;XM_021608391.1;XM_021599035.1;XM_021599034.1;XM_021608390.1;XM_021599032.1;XM_021611913.1;XM_021625371.1	11	754	223	14558	0.609855
4727	GABAergic synapse	XM_021615789.1;XM_021617177.1;XM_021617219.1;XM_021597511.1	4	754	81	14558	0.610223
380	Tryptophan metabolism	XM_021617966.1;XM_021600693.1;XM_021609133.1	3	754	62	14558	0.629646
5014	Amyotrophic lateral sclerosis (ALS)	XM_021568171.1	1	754	19	14558	0.636183
5034	Alcoholism	XM_021597511.1;XM_021617219.1;XM_021617177.1	3	754	63	14558	0.640474
510	N-Glycan biosynthesis	XM_021579370.1;XM_021574958.1;XM_021568914.1;NM_001165177.1;XM_021620514.1	5	754	106	14558	0.647974
4744	Phototransduction	XM_021569926.1;XM_021618566.1	2	754	43	14558	0.660238
4726	Serotonergic synapse	XM_021597511.1;XM_021617219.1;XM_021617177.1	3	754	65	14558	0.661456
563	Glycosylphosphatidylinositol (GPI)-anchor biosynthesis	NM_001165177.1;XM_021605763.1	2	754	45	14558	0.684617
562	Inositol phosphate metabolism	XM_021620387.1;XM_021619708.1;XM_021600490.1;XM_021620816.1;XM_021620817.1;XM_021600876.1;XM_021577257.1;XM_021600491.1;XM_021600492.1	9	754	195	14558	0.686019
310	Lysine degradation	XM_021602913.1;XM_021557468.1;XM_021602912.1;XM_021600693.1;XM_021602915.1	5	754	111	14558	0.687659
860	Porphyrin and chlorophyll metabolism	XM_021558901.1	1	754	22	14558	0.689905
4723	Retrograde endocannabinoid signaling	XM_021617219.1;XM_021597511.1;XM_021617177.1	3	754	68	14558	0.69124
983	Drug metabolism - other enzymes	XM_021570675.1;XM_021610960.1	2	754	46	14558	0.696259
4924	Renin secretion	XM_021568171.1	1	754	23	14558	0.70599
4730	Long-term depression	XM_021597511.1	1	754	23	14558	0.70599
72	Synthesis and degradation of ketone bodies	XM_021600693.1	1	754	23	14558	0.70599
4614	Renin-angiotensin system	XM_021606198.1	1	754	23	14558	0.70599
3050	Proteasome	XM_021609072.1	1	754	24	14558	0.721242
4212	Longevity regulating pathway - worm	XM_021588062.1	1	754	24	14558	0.721242
4978	Mineral absorption	XM_021607795.1;XM_021583321.1;XM_021624416.1	3	754	72	14558	0.727822
5133	Pertussis	XM_021600978.1	1	754	26	14558	0.749416
5134	Legionellosis	XM_021611242.1;XM_021615332.1	2	754	52	14558	0.758809
4020	Calcium signaling pathway	XM_021600490.1;XM_021600492.1;XM_021597248.1;XM_021601421.1;XM_021564848.1;XM_021564037.1;XM_021600491.1;XM_021610377.1;XM_021610380.1;XM_021601776.1;XM_021599034.1;XM_021618566.1;XM_021610376.1;XM_021617257.1;XM_021568171.1;XM_021599032.1;XM_021599035.1	17	754	381	14558	0.771353
620	Pyruvate metabolism	XM_021566515.1;XM_021600693.1	2	754	54	14558	0.777035
190	Oxidative phosphorylation	XM_021592297.1;NM_001160489.1	2	754	54	14558	0.777035
5130	Pathogenic Escherichia coli infection	XM_021606783.1	1	754	29	14558	0.786434
5161	Hepatitis B	XM_021600978.1	1	754	30	14558	0.797518
4130	SNARE interactions in vesicular transport	XM_021598380.1;NM_001160693.1	2	754	57	14558	0.802112
5322	Systemic lupus erythematosus	XM_021621616.1;XM_021621610.1	2	754	57	14558	0.802112
590	Arachidonic acid metabolism	XM_021601777.1;XM_021601778.1;XM_021604546.1	3	754	82	14558	0.804367
5169	Epstein-Barr virus infection	XM_021591456.1;XM_021623901.1;XM_021623900.1	3	754	82	14558	0.804367
4151	PI3K-Akt signaling pathway	XM_021623900.1;XM_021617177.1;XM_021623901.1;XM_021617219.1	4	754	106	14558	0.805685
4270	Vascular smooth muscle contraction	XM_021599032.1;XM_021600072.1;XM_021599035.1;XM_021563527.1;XM_021599034.1;XM_021621276.1;XM_021610460.1;XM_021585072.1;XM_021618566.1;XM_021598500.1	10	754	245	14558	0.821996
650	Butanoate metabolism	XM_021600693.1	1	754	34	14558	0.836396
5145	Toxoplasmosis	XM_021597511.1	1	754	35	14558	0.844889
4260	Cardiac muscle contraction	XM_021562849.1;XM_021575565.1;XM_021560283.1;XM_021597248.1	4	754	115	14558	0.852989
4115	p53 signaling pathway	XM_021604673.1;XM_021580672.1;NM_001124652.1;XM_021558558.1;XM_021604674.1;XM_021618276.1;XM_021611004.1	7	754	186	14558	0.853639
3460	Fanconi anemia pathway	XM_021616174.1;XM_021567990.1	2	754	66	14558	0.862929
220	Arginine biosynthesis	XM_021570525.1	1	754	38	14558	0.867817
4610	Complement and coagulation cascades	XM_021577842.1;XM_021600424.1	2	754	68	14558	0.873882
3420	Nucleotide excision repair	XM_021616174.1;XM_021567990.1	2	754	69	14558	0.879051
4066	HIF-1 signaling pathway	NM_001124710.1	1	754	43	14558	0.898757
980	Metabolism of xenobiotics by cytochrome P450	XM_021567028.1	1	754	43	14558	0.898757
5222	Small cell lung cancer	XM_021582546.1	1	754	43	14558	0.898757
4622	RIG-I-like receptor signaling pathway	XM_021602372.1;XM_021621801.1;XM_021621800.1;XM_021621802.1	4	754	128	14558	0.90384
5203	Viral carcinogenesis	XM_021621610.1;XM_021623901.1;XM_021591456.1;XM_021621616.1;XM_021623900.1	5	754	158	14558	0.917239
4214	Apoptosis - fly	XM_021565671.1	1	754	47	14558	0.918213
20	Citrate cycle (TCA cycle)	XM_021558013.1	1	754	47	14558	0.918213
52	Galactose metabolism	XM_021564132.1	1	754	48	14558	0.922462
4919	Thyroid hormone signaling pathway	XM_021611327.1;XM_021614401.1	2	754	81	14558	0.927511
4114	Oocyte meiosis	XM_021623900.1;XM_021623901.1;XM_021568171.1;XM_021621276.1;XM_021618566.1;XM_021574251.1;XM_021565840.1	7	754	215	14558	0.933361
500	Starch and sucrose metabolism	XM_021564132.1	1	754	51	14558	0.933933
5168	Herpes simplex virus 1 infection	XM_021600978.1;NM_001146168.1;XM_021589099.1;XM_021585443.1;XM_021621800.1;XM_021621276.1;XM_021613694.1;XM_021618563.1;XM_021602892.1;XM_021621801.1;XM_021591456.1;XM_021621802.1;XM_021557504.1;XM_021602372.1	14	754	383	14558	0.936921
4621	NOD-like receptor signaling pathway	XM_021621802.1;XM_021557504.1;XM_021621801.1;XM_021621800.1;XM_021617305.1	5	754	170	14558	0.943775
4721	Synaptic vesicle cycle	XM_021587425.1;XM_021587424.1	2	754	90	14558	0.951124
2010	ABC transporters	XM_021567796.1	1	754	57	14558	0.95204
250	Alanine, aspartate and glutamate metabolism	XM_021570525.1	1	754	61	14558	0.961265
4120	Ubiquitin mediated proteolysis	XM_021613995.1;XM_021618795.1;XM_021557222.1;NM_001146168.1;XM_021568638.1;XM_021618780.1;XM_021574937.1;XM_021625564.1;XM_021602282.1;XM_021566303.1;XM_021615737.1;XM_021609847.1;XM_021617305.1	13	754	381	14558	0.961813
5205	Proteoglycans in cancer	XM_021577503.1;XM_021603847.1;XM_021568765.1	3	754	127	14558	0.96348
3022	Basal transcription factors	XM_021618563.1	1	754	63	14558	0.965189
10	Glycolysis / Gluconeogenesis	XM_021566515.1	1	754	64	14558	0.967
4666	Fc gamma R-mediated phagocytosis	XM_021600694.1	1	754	69	14558	0.974737
561	Glycerolipid metabolism	XM_021604241.1;XM_021565200.1	2	754	106	14558	0.976159
4972	Pancreatic secretion	XM_021597248.1	1	754	71	14558	0.977298
3040	Spliceosome	XM_021585443.1;XM_021558240.1;XM_021557663.1;XM_021567067.1;XM_021615616.1;XM_021625376.1;XM_021598499.1	7	754	258	14558	0.982178
5010	Alzheimer disease	XM_021568171.1	1	754	76	14558	0.982623
4146	Peroxisome	XM_021570675.1;XM_021619047.1;XM_021610960.1;NM_001160614.1	4	754	177	14558	0.983711
4514	Cell adhesion molecules (CAMs)	XM_021620606.1;XM_021607212.1;XM_021620605.1;XM_021620604.1;XM_021608539.1;XM_021608537.1;XM_021608534.1;XM_021609100.1;XM_021620608.1;XM_021608538.1;XM_021607211.1;XM_021609553.1;XM_021608536.1;XM_021608540.1;XM_021603309.1;XM_021608535.1;XM_021563366.1;XM_021607214.1;XM_021608541.1	19	754	559	14558	0.983727
4974	Protein digestion and absorption	XM_021578900.1;XM_021611327.1	2	754	117	14558	0.985598
4911	Insulin secretion	XM_021597248.1	1	754	84	14558	0.988672
600	Sphingolipid metabolism	XM_021604241.1	1	754	84	14558	0.988672
564	Glycerophospholipid metabolism	XM_021604241.1;XM_021565200.1;XM_021557663.1;XM_021606340.1	4	754	190	14558	0.990189
5410	Hypertrophic cardiomyopathy (HCM)	XM_021597248.1;XM_021585299.1;XM_021559400.1	3	754	160	14558	0.990656
565	Ether lipid metabolism	XM_021604241.1	1	754	88	14558	0.990854
5152	Tuberculosis	XM_021568171.1	1	754	89	14558	0.991331
5414	Dilated cardiomyopathy (DCM)	XM_021559400.1;XM_021597248.1;XM_021585299.1	3	754	162	14558	0.991419
603	Glycosphingolipid biosynthesis - globo and isoglobo series	XM_021590555.1;XM_021590554.1	2	754	130	14558	0.992134
5206	MicroRNAs in cancer	XM_021571280.1;XM_021577503.1	2	754	139	14558	0.99485
4360	Axon guidance	XM_021567489.1;XM_021610954.1;XM_021623204.1;XM_021576208.1;XM_021568171.1;XM_021576209.1;XM_021590934.1	7	754	320	14558	0.99791
4320	Dorso-ventral axis formation	XM_021625370.1;NM_001160608.1;XM_021616112.1;XM_021625371.1;XM_021614369.1	5	754	272	14558	0.998714
4950	Maturity onset diabetes of the young	XM_021603939.1	1	754	149	14558	0.999653
4080	Neuroactive ligand-receptor interaction	XM_021607025.1;XM_021589162.1;XM_021567690.1;XM_021567705.1;XM_021607028.1;XM_021601776.1;XM_021560597.1;XM_021607027.1;XM_021607026.1;XM_021607029.1;XM_021621844.1	11	754	488	14558	0.999679

## Sheet: Cluster 27
pathway_id	pathway_name	Genes	S gene number	TS gene number	B gene number	TB gene number	pvalue
4910	Insulin signaling pathway	XM_021615092.1;XM_021615100.1;XM_021574463.1;XM_021615112.1;XM_021615118.1;XM_021615127.1;XM_021615098.1;XM_021615108.1;XM_021615120.1;XM_021615121.1;XM_021615124.1;XM_021585917.1;XM_021615133.1;XM_021615105.1;XM_021615101.1;XM_021614439.1;XM_021615110.1;XM_021615117.1;XM_021585916.1;XM_021578054.1;XM_021615091.1;XM_021615099.1;XM_021615095.1;XM_021615093.1;XM_021615111.1;XM_021615129.1;XM_021585…	51	547	406	14558	2.65343e-14
4931	Insulin resistance	XM_021615105.1;XM_021609073.1;XM_021609076.1;XM_021615129.1;XM_021615123.1;XM_021615127.1;XM_021615125.1;XM_021615106.1;XM_021615119.1;XM_021615095.1;XM_021615133.1;XM_021615130.1;XM_021615107.1;XM_021615110.1;XM_021615132.1;XM_021615108.1;XM_021615121.1;XM_021615111.1;XM_021615112.1;XM_021615101.1;XM_021615116.1;XM_021615124.1;XM_021615115.1;XM_021615098.1;XM_021620354.1;XM_021600829.1;XM_021615…	53	547	435	14558	2.90878e-14
4520	Adherens junction	XM_021615101.1;XM_021622768.1;XM_021615114.1;XM_021615103.1;XM_021578054.1;XM_021615133.1;XM_021615120.1;XM_021615093.1;XM_021615091.1;XM_021615118.1;NM_001281323.1;XM_021615096.1;XM_021615108.1;XM_021622770.1;XM_021587555.1;XM_021615130.1;XM_021587554.1;XM_021615094.1;XM_021615099.1;XM_021615119.1;XM_021615127.1;XM_021615113.1;XM_021615121.1;XM_021615129.1;XM_021615134.1;XM_021615092.1;XM_021579…	50	547	437	14558	1.78735e-12
4514	Cell adhesion molecules (CAMs)	XM_021615094.1;XM_021615113.1;XM_021615130.1;XM_021615133.1;XM_021615117.1;XM_021615122.1;XM_021615097.1;XM_021584880.1;XM_021615108.1;XM_021615095.1;XM_021615120.1;XM_021615107.1;XM_021615103.1;XM_021615115.1;XM_021615134.1;XM_021615092.1;XM_021617797.1;XM_021615099.1;XM_021615118.1;XM_021615123.1;XM_021615093.1;XM_021615119.1;XM_021615126.1;XM_021615091.1;XM_021617795.1;XM_021615105.1;XM_021578…	55	547	559	14558	5.40981e-11
3013	RNA transport	XM_021625068.1;XM_021567754.1;XM_021588475.1;XM_021567756.1;XM_021625061.1;XM_021625065.1;XM_021598092.1;XM_021600217.1;XM_021567757.1;XM_021568052.1;XM_021576731.1;XM_021624988.1;XM_021625064.1;XM_021600216.1;XM_021624986.1;XM_021625060.1;XM_021625069.1;XM_021625059.1;XM_021563205.1;XM_021610740.1;XM_021567760.1;XM_021625071.1;XM_021624987.1;XM_021563206.1;XM_021625066.1;XM_021577710.1;XM_021588…	39	547	341	14558	5.571e-10
3015	mRNA surveillance pathway	XM_021625066.1;XM_021568052.1;XM_021625063.1;XM_021625060.1;XM_021625068.1;XM_021578213.1;XM_021567757.1;XM_021605903.1;XM_021578214.1;XM_021567759.1;XM_021623162.1;XM_021567754.1;XM_021625065.1;XM_021625070.1;XM_021567760.1;XM_021625069.1;XM_021625061.1;XM_021567756.1;XM_021625064.1;XM_021625071.1;XM_021625062.1;XM_021567753.1;XM_021600216.1;XM_021578218.1;XM_021625059.1;XM_021578215.1;XM_021618…	28	547	221	14558	1.73618e-08
3040	Spliceosome	XM_021566612.1;XM_021602412.1;XM_021602418.1;XM_021613966.1;XM_021566609.1;XM_021614327.1;XM_021558297.1;XM_021602415.1;XM_021602410.1;XM_021602413.1;XM_021625428.1;XM_021568052.1;XM_021602409.1;XM_021625426.1;XM_021595399.1;XM_021602408.1;XM_021566610.1;XM_021602411.1;XM_021613963.1;XM_021613962.1;XM_021602419.1;XM_021625429.1;XM_021602414.1;XM_021625430.1;XM_021625425.1;XM_021602417.1;XM_021613…	30	547	258	14558	3.90845e-08
3018	RNA degradation	XM_021567754.1;XM_021625068.1;XM_021583641.1;XM_021567753.1;XM_021625071.1;XM_021583643.1;XM_021625070.1;XM_021625069.1;XM_021567756.1;XM_021567760.1;XM_021567757.1;XM_021600217.1;XM_021625060.1;XM_021600216.1;XM_021625061.1;XM_021625063.1;XM_021567759.1;XM_021625062.1;XM_021625066.1;XM_021625064.1;XM_021625065.1;XM_021583642.1;XM_021625059.1	23	547	219	14558	8.59817e-06
5100	Bacterial invasion of epithelial cells	XM_021610184.1;XM_021610187.1;XM_021610189.1;XM_021610185.1;XM_021610186.1;XM_021610188.1;XM_021610182.1;XM_021610190.1;XM_021610183.1;XM_021610193.1	10	547	48	14558	9.31518e-06
4144	Endocytosis	XM_021563219.1;XM_021583869.1;XM_021558237.1;XM_021562909.1;XM_021610190.1;XM_021614080.1;XM_021610703.1;XM_021601634.1;XM_021601263.1;XM_021601909.1;XM_021610182.1;XM_021583870.1;XM_021610193.1;XM_021610185.1;XM_021562904.1;XM_021563218.1;XM_021604684.1;XM_021614652.1;XM_021610186.1;XM_021601636.1;XM_021610188.1;XM_021601639.1;XM_021590803.1;XM_021601267.1;XM_021601262.1;XM_021601640.1;XM_021601…	57	547	897	14558	6.54676e-05
4978	Mineral absorption	XM_021586425.1;XM_021590707.1;XM_021590708.1;XM_021590710.1;XM_021590709.1;XM_021580894.1;XM_021590711.1;XM_021590706.1;XM_021560770.1	9	547	72	14558	0.00144476
4141	Protein processing in endoplasmic reticulum	XM_021573954.1;XM_021576738.1;XM_021620119.1;XM_021559863.1;XM_021597282.1;XM_021579642.1;XM_021576107.1;XM_021568310.1;XM_021564972.1;XM_021557175.1;XM_021576739.1;XM_021576108.1;XM_021564971.1;XM_021563319.1;NM_001124510.1;XM_021568309.1;XM_021601254.1;XM_021581144.1;XM_021569376.1;XM_021622602.1;XM_021609590.1;XM_021563309.1;XM_021568051.1;XM_021563581.1;XM_021603240.1;XM_021622601.1;XM_021610…	28	547	407	14558	0.00155748
4974	Protein digestion and absorption	XM_021559853.1;XM_021573059.1;XM_021559860.1;XM_021559856.1;XM_021613380.1;XM_021559852.1;XM_021613379.1;XM_021559850.1;XM_021572251.1;XM_021572252.1;XM_021559851.1	11	547	117	14558	0.0045436
5010	Alzheimer disease	XM_021618469.1;XM_021618468.1;XM_021618467.1;XM_021618466.1;XM_021603569.1;XM_021603568.1;XM_021607816.1;XM_021618465.1	8	547	76	14558	0.0075591
4020	Calcium signaling pathway	XM_021578109.1;XM_021578770.1;XM_021606258.1;XM_021578772.1;XM_021581118.1;XM_021585914.1;XM_021578103.1;XM_021578773.1;XM_021585916.1;XM_021578771.1;XM_021603569.1;XM_021622667.1;XM_021572885.1;XM_021581117.1;XM_021603568.1;XM_021578110.1;XM_021581119.1;XM_021578106.1;XM_021578107.1;XM_021578105.1;XM_021585917.1;XM_021585915.1;XM_021578104.1	23	547	381	14558	0.0174835
2010	ABC transporters	XM_021587968.1;XM_021556881.1;XM_021619414.1;XM_021556882.1;XM_021619415.1;XM_021587967.1	6	547	57	14558	0.0196374
10	Glycolysis / Gluconeogenesis	XM_021565229.1;XM_021574683.1;XM_021565247.1;XM_021560606.1;XM_021565221.1;XM_021565239.1	6	547	64	14558	0.0326477
5206	MicroRNAs in cancer	XM_021566233.1;XM_021566230.1;XM_021566229.1;XM_021579737.1;XM_021566232.1;XM_021566234.1;XM_021566236.1;XM_021566227.1;XM_021566235.1;XM_021566228.1	10	547	139	14558	0.0368272
4611	Platelet activation	XM_021574107.1;XM_021574108.1;XM_021574111.1;XM_021574109.1;XM_021574112.1;XM_021574110.1	6	547	67	14558	0.0396093
4666	Fc gamma R-mediated phagocytosis	XM_021623306.1;XM_021580056.1;XM_021623303.1;XM_021623305.1;XM_021623302.1;XM_021623304.1	6	547	69	14558	0.0447357
4145	Phagosome	XM_021584878.1;XM_021583869.1;XM_021556225.1;XM_021558124.1;XM_021583637.1;XM_021621682.1;XM_021584881.1;XM_021584880.1;XM_021616567.1;XM_021584879.1;XM_021566107.1;XM_021583868.1;XM_021578822.1;XM_021576409.1;XM_021583871.1;XM_021583870.1	16	547	273	14558	0.0530201
261	Monobactam biosynthesis	XM_021573373.1	1	547	2	14558	0.0737384
4672	Intestinal immune network for IgA production	XM_021584880.1;XM_021584881.1;XM_021584879.1;XM_021584878.1	4	547	43	14558	0.0769629
4380	Osteoclast differentiation	XM_021581947.1;XM_021584634.1;XM_021581946.1	3	547	27	14558	0.0792344
670	One carbon pool by folate	XM_021563617.1;XM_021566543.1	2	547	13	14558	0.0836176
5012	Parkinson disease	XM_021606258.1;XM_021614683.1;XM_021614685.1	3	547	28	14558	0.0863752
5168	Herpes simplex virus 1 infection	XM_021575350.1;XM_021584879.1;XM_021558297.1;XM_021568052.1;XM_021575334.1;XM_021625428.1;XM_021575344.1;XM_021584880.1;XM_021575353.1;XM_021575336.1;XM_021618797.1;XM_021625425.1;XM_021625429.1;XM_021575337.1;XM_021584878.1;XM_021564563.1;XM_021575339.1;XM_021584881.1;XM_021625430.1;XM_021625426.1	20	547	383	14558	0.0866495
5034	Alcoholism	XM_021571115.1;XM_021581946.1;XM_021581947.1;XM_021606628.1;XM_021609836.1	5	547	63	14558	0.0874941
5130	Pathogenic Escherichia coli infection	XM_021593382.1;XM_021593372.1;XM_021593376.1	3	547	29	14558	0.0937773
5031	Amphetamine addiction	XM_021581946.1;XM_021581947.1	2	547	14	14558	0.0952053
330	Arginine and proline metabolism	XM_021600287.1;XM_021619123.1;XM_021564935.1;XM_021600286.1	4	547	48	14558	0.105216
4350	TGF-beta signaling pathway	XM_021558237.1;XM_021615606.1;XM_021583637.1;XM_021612593.1;XM_021563138.1;XM_021563132.1;XM_021566437.1;XM_021612592.1;XM_021563137.1;XM_021612591.1;XM_021563084.1;XM_021563131.1	12	547	220	14558	0.126256
260	Glycine, serine and threonine metabolism	XM_021583785.1;XM_021603101.1;XM_021566543.1	3	547	35	14558	0.143061
4310	Wnt signaling pathway	XM_021612593.1;XM_021578109.1;XM_021578110.1;XM_021578106.1;XM_021606383.1;XM_021578104.1;NM_001281323.1;XM_021578107.1;XM_021578103.1;XM_021606382.1;XM_021578105.1;XM_021606384.1;XM_021612592.1;XM_021623518.1;XM_021564968.1;XM_021563137.1;XM_021612591.1;XM_021563138.1;XM_021606385.1	19	547	393	14558	0.157221
4115	p53 signaling pathway	XM_021605572.1;XM_021611332.1;XM_021605543.1;XM_021606385.1;XM_021583637.1;XM_021605552.1;XM_021606384.1;XM_021605563.1;XM_021606382.1;XM_021606383.1	10	547	186	14558	0.163098
750	Vitamin B6 metabolism	XM_021579756.1	1	547	5	14558	0.174294
4122	Sulfur relay system	XM_021610441.1;XM_021610442.1	2	547	22	14558	0.199484
5030	Cocaine addiction	XM_021602465.1;XM_021581946.1;XM_021581947.1	3	547	43	14558	0.218569
3050	Proteasome	XM_021572632.1;XM_021585126.1	2	547	24	14558	0.227379
310	Lysine degradation	XM_021559865.1;XM_021603830.1;XM_021603832.1;XM_021603829.1;XM_021559866.1;XM_021603831.1	6	547	111	14558	0.238913
4962	Vasopressin-regulated water reabsorption	XM_021583044.1;XM_021564975.1	2	547	25	14558	0.241432
4110	Cell cycle	XM_021586511.1;XM_021607643.1;XM_021612593.1;XM_021584634.1;XM_021588009.1;XM_021588010.1;XM_021612592.1;XM_021607645.1;XM_021588013.1;XM_021588012.1;XM_021588011.1;XM_021612591.1	12	547	255	14558	0.252353
3060	Protein export	XM_021584735.1	1	547	8	14558	0.263951
270	Cysteine and methionine metabolism	XM_021620862.1;XM_021600286.1;XM_021614345.1;XM_021600287.1	4	547	71	14558	0.277166
4973	Carbohydrate digestion and absorption	XM_021616647.1	1	547	10	14558	0.318255
510	N-Glycan biosynthesis	XM_021589020.1;XM_021564971.1;XM_021618976.1;XM_021564972.1;XM_021609590.1	5	547	106	14558	0.367679
1200	Carbon metabolism	XM_021574683.1;XM_021565221.1;XM_021598719.1;XM_021565229.1;XM_021566543.1;XM_021565239.1;XM_021560606.1;XM_021565247.1	8	547	182	14558	0.376553
4370	VEGF signaling pathway	XM_021574463.1;XM_021578103.1;XM_021578110.1;XM_021578107.1;XM_021578104.1;XM_021578105.1;XM_021578109.1;XM_021578106.1	8	547	185	14558	0.393764
4977	Vitamin digestion and absorption	XM_021605968.1;XM_021621495.1	2	547	36	14558	0.394204
564	Glycerophospholipid metabolism	XM_021612515.1;XM_021612518.1;XM_021601690.1;XM_021612517.1;XM_021601698.1;XM_021612514.1;XM_021612519.1;XM_021556960.1	8	547	190	14558	0.422474
4150	mTOR signaling pathway	XM_021563206.1;XM_021566127.1;XM_021563205.1;XM_021563209.1;XM_021563207.1;XM_021574463.1;XM_021563208.1;XM_021620354.1;XM_021563210.1	9	547	218	14558	0.434768
4022	cGMP-PKG signaling pathway	XM_021606258.1;XM_021603569.1;XM_021603568.1	3	547	66	14558	0.453638
920	Sulfur metabolism	XM_021573373.1	1	547	16	14558	0.458325
531	Glycosaminoglycan degradation	XM_021569916.1;XM_021569915.1	2	547	41	14558	0.459299
410	beta-Alanine metabolism	XM_021619123.1	1	547	17	14558	0.4787
4391	Hippo signaling pathway - fly	XM_021615371.1;XM_021615374.1;XM_021613766.1;XM_021615372.1;XM_021587812.1	5	547	121	14558	0.479068
4950	Maturity onset diabetes of the young	XM_021617952.1;XM_021617954.1;XM_021617953.1;XM_021617950.1;XM_021617949.1;XM_021617951.1	6	547	149	14558	0.490328
4972	Pancreatic secretion	XM_021603569.1;XM_021622567.1;XM_021603568.1	3	547	71	14558	0.501988
5210	Colorectal cancer	XM_021609187.1	1	547	20	14558	0.535349
4915	Estrogen signaling pathway	XM_021557693.1;XM_021572445.1	2	547	48	14558	0.543173
450	Selenocompound metabolism	XM_021573373.1	1	547	21	14558	0.552832
4215	Apoptosis - multiple species	XM_021614683.1;XM_021614685.1	2	547	49	14558	0.554395
4114	Oocyte meiosis	XM_021578107.1;XM_021578104.1;XM_021578110.1;XM_021578109.1;XM_021578106.1;XM_021620354.1;XM_021578103.1;XM_021578105.1	8	547	215	14558	0.561877
4120	Ubiquitin mediated proteolysis	XM_021588882.1;XM_021624987.1;XM_021623667.1;XM_021569376.1;XM_021624988.1;XM_021566497.1;XM_021624986.1;XM_021588880.1;XM_021566498.1;XM_021566496.1;XM_021623665.1;XM_021558237.1;XM_021588879.1;XM_021623666.1	14	547	381	14558	0.572996
3410	Base excision repair	XM_021577671.1;XM_021577670.1	2	547	51	14558	0.576248
4727	GABAergic synapse	XM_021597401.1;XM_021571115.1;XM_021564975.1	3	547	81	14558	0.591528
520	Amino sugar and nucleotide sugar metabolism	XM_021599466.1;XM_021599465.1	2	547	53	14558	0.597308
190	Oxidative phosphorylation	XM_021568424.1;XM_021585940.1	2	547	54	14558	0.60754
4512	ECM-receptor interaction	XM_021583637.1;XM_021622701.1;XM_021598190.1;XM_021566825.1;XM_021616567.1;XM_021576409.1;XM_021566107.1;XM_021566824.1	8	547	227	14558	0.623499
5322	Systemic lupus erythematosus	XM_021606628.1;XM_021609836.1	2	547	57	14558	0.637045
4261	Adrenergic signaling in cardiomyocytes	XM_021616570.1;XM_021574463.1;XM_021616568.1;XM_021578771.1;XM_021578772.1;XM_021578773.1;XM_021615703.1;XM_021605903.1;XM_021616569.1;XM_021616573.1;XM_021578770.1;XM_021616572.1	12	547	348	14558	0.660989
4360	Axon guidance	XM_021569484.1;XM_021616073.1;XM_021569487.1;XM_021581732.1;XM_021566548.1;XM_021564223.1;XM_021566997.1;XM_021569486.1;XM_021569488.1;XM_021569485.1;XM_021590193.1	11	547	320	14558	0.661648
250	Alanine, aspartate and glutamate metabolism	XM_021557496.1;XM_021604358.1	2	547	61	14558	0.673641
1210	2-Oxocarboxylic acid metabolism	XM_021598719.1	1	547	30	14558	0.683397
4210	Apoptosis	XM_021614685.1;XM_021614683.1	2	547	63	14558	0.690787
3030	DNA replication	XM_021580991.1	1	547	31	14558	0.695317
5340	Primary immunodeficiency	XM_021584634.1	1	547	31	14558	0.695317
4142	Lysosome	XM_021557499.1;XM_021574564.1;XM_021574569.1;XM_021621922.1;XM_021621921.1;XM_021588876.1;XM_021621923.1;XM_021578822.1	8	547	243	14558	0.697836
3008	Ribosome biogenesis in eukaryotes	XM_021585701.1;XM_021625602.1	2	547	66	14558	0.715108
4650	Natural killer cell mediated cytotoxicity	XM_021584634.1	1	547	33	14558	0.717831
3440	Homologous recombination	XM_021572632.1	1	547	33	14558	0.717831
430	Taurine and hypotaurine metabolism	XM_021620862.1	1	547	35	14558	0.738684
630	Glyoxylate and dicarboxylate metabolism	XM_021583785.1;XM_021566543.1	2	547	70	14558	0.745018
1230	Biosynthesis of amino acids	XM_021564935.1;XM_021560606.1;XM_021598719.1	3	547	103	14558	0.748846
5164	Influenza A	XM_021576108.1;XM_021576107.1;XM_021568647.1;XM_021578749.1	4	547	135	14558	0.751706
4713	Circadian entrainment	XM_021571115.1	1	547	38	14558	0.767115
4211	Longevity regulating pathway	XM_021609187.1	1	547	40	14558	0.784332
4725	Cholinergic synapse	XM_021571115.1	1	547	41	14558	0.792457
4260	Cardiac muscle contraction	XM_021585940.1;XM_021568424.1;XM_021615703.1	3	547	115	14558	0.811875
563	Glycosylphosphatidylinositol (GPI)-anchor biosynthesis	XM_021625454.1	1	547	45	14558	0.822017
4064	NF-kappa B signaling pathway	XM_021584634.1	1	547	46	14558	0.828725
983	Drug metabolism - other enzymes	XM_021566865.1	1	547	46	14558	0.828725
600	Sphingolipid metabolism	XM_021604487.1;XM_021593712.1	2	547	84	14558	0.829332
4550	Signaling pathways regulating pluripotency of stem cells	XM_021617953.1;XM_021617950.1;XM_021617954.1;XM_021617952.1;XM_021617951.1;XM_021617949.1	6	547	217	14558	0.829643
4340	Hedgehog signaling pathway	XM_021559162.1;XM_021623518.1;XM_021556649.1	3	547	119	14558	0.829683
20	Citrate cycle (TCA cycle)	XM_021598719.1	1	547	47	14558	0.835181
5032	Morphine addiction	XM_021571115.1	1	547	48	14558	0.841394
601	Glycosphingolipid biosynthesis - lacto and neolacto series	XM_021606414.1;XM_021606419.1;XM_021618976.1;XM_021606415.1;XM_021606418.1	5	547	193	14558	0.855559
4721	Synaptic vesicle cycle	XM_021564975.1;XM_021603240.1	2	547	90	14558	0.857088
4668	TNF signaling pathway	XM_021585985.1	1	547	52	14558	0.863994
51	Fructose and mannose metabolism	XM_021560606.1	1	547	53	14558	0.869123
533	Glycosaminoglycan biosynthesis - keratan sulfate	XM_021618976.1	1	547	53	14558	0.869123
620	Pyruvate metabolism	XM_021583785.1	1	547	54	14558	0.874058
4062	Chemokine signaling pathway	XM_021571115.1	1	547	55	14558	0.878808
4922	Glucagon signaling pathway	XM_021568240.1	1	547	57	14558	0.887778
4320	Dorso-ventral axis formation	XM_021613962.1;XM_021613961.1;XM_021613963.1;XM_021613964.1;XM_021616305.1;XM_021613966.1;XM_021577599.1	7	547	272	14558	0.890001
4660	T cell receptor signaling pathway	XM_021584634.1	1	547	59	14558	0.896085
5416	Viral myocarditis	XM_021588211.1	1	547	63	14558	0.910902
480	Glutathione metabolism	XM_021598719.1	1	547	64	14558	0.914265
4726	Serotonergic synapse	XM_021571115.1	1	547	65	14558	0.9175
3460	Fanconi anemia pathway	XM_021580677.1	1	547	66	14558	0.920614
4610	Complement and coagulation cascades	XM_021605324.1	1	547	68	14558	0.926494
4723	Retrograde endocannabinoid signaling	XM_021571115.1	1	547	68	14558	0.926494
4976	Bile secretion	XM_021611773.1	1	547	68	14558	0.926494
240	Pyrimidine metabolism	XM_021574355.1;XM_021566865.1;XM_021560258.1	3	547	152	14558	0.928628
5016	Huntington disease	XM_021606258.1	1	547	72	14558	0.936982
562	Inositol phosphate metabolism	XM_021560606.1;XM_021558124.1;XM_021583864.1;XM_021607372.1	4	547	195	14558	0.938488
4724	Glutamatergic synapse	XM_021571115.1	1	547	74	14558	0.941651
4152	AMPK signaling pathway	NM_001160664.1	1	547	80	14558	0.953687
4740	Olfactory transduction	XM_021571115.1	1	547	80	14558	0.953687
4919	Thyroid hormone signaling pathway	XM_021604431.1	1	547	81	14558	0.955437
5132	Salmonella infection	XM_021604684.1;XM_021579444.1;XM_021568237.1	3	547	169	14558	0.955673
230	Purine metabolism	XM_021574355.1;XM_021578548.1;XM_021604358.1;XM_021557496.1;XM_021563587.1;XM_021563586.1;XM_021573373.1	7	547	317	14558	0.956463
5200	Pathways in cancer	XM_021609187.1;XM_021577276.1;XM_021577278.1;XM_021577277.1;XM_021571115.1	5	547	246	14558	0.956857
4012	ErbB signaling pathway	XM_021612592.1;XM_021574463.1;XM_021612591.1;XM_021614439.1;XM_021612593.1	5	547	246	14558	0.956857
4620	Toll-like receptor signaling pathway	XM_021574463.1;XM_021612380.1;XM_021612379.1	3	547	170	14558	0.95692
5169	Epstein-Barr virus infection	XM_021618797.1	1	547	82	14558	0.957121
4810	Regulation of actin cytoskeleton	XM_021587554.1;XM_021606414.1;XM_021566107.1;XM_021558124.1;XM_021621687.1;XM_021621683.1;XM_021622701.1;XM_021598190.1;XM_021616567.1;XM_021606418.1;XM_021604684.1;XM_021587555.1;XM_021621686.1;XM_021606419.1;XM_021579444.1;XM_021606415.1;XM_021621684.1	17	547	648	14558	0.957444
514	Other types of O-glycan biosynthesis	XM_021618976.1	1	547	84	14558	0.9603
565	Ether lipid metabolism	XM_021582439.1	1	547	88	14558	0.96597
4728	Dopaminergic synapse	XM_021571115.1	1	547	88	14558	0.96597
4070	Phosphatidylinositol signaling system	XM_021601690.1;XM_021558124.1;XM_021607372.1;XM_021601698.1;XM_021583864.1;XM_021566127.1	6	547	295	14558	0.968021
4010	MAPK signaling pathway	XM_021612888.1;XM_021597574.1;XM_021599332.1;XM_021578105.1;XM_021578106.1;XM_021578103.1;XM_021574463.1;XM_021612593.1;XM_021612592.1;XM_021578104.1;XM_021615703.1;XM_021614652.1;XM_021578107.1;XM_021620354.1;XM_021572283.1;XM_021612591.1;XM_021578110.1;XM_021578109.1;XM_021605054.1	19	547	754	14558	0.978522
5166	Human T-cell leukemia virus 1 infection	XM_021584634.1;XM_021606258.1	2	547	151	14558	0.979215
4630	Jak-STAT signaling pathway	XM_021574463.1;XM_021612592.1;XM_021566127.1;XM_021612593.1;XM_021612591.1	5	547	276	14558	0.979674
4151	PI3K-Akt signaling pathway	XM_021571115.1	1	547	106	14558	0.983001
561	Glycerolipid metabolism	XM_021622239.1	1	547	106	14558	0.983001
4510	Focal adhesion	XM_021587554.1;XM_021614439.1;XM_021601690.1;XM_021587555.1;XM_021576409.1;XM_021616567.1;XM_021583637.1;XM_021566107.1;XM_021566824.1;XM_021566825.1;XM_021598190.1;XM_021601698.1;XM_021574463.1;XM_021622701.1	14	547	619	14558	0.987493
4530	Tight junction	XM_021578869.1;XM_021580713.1;XM_021605903.1;XM_021587554.1;XM_021612985.1;XM_021612995.1;XM_021574463.1;XM_021587555.1;XM_021556878.1;XM_021556877.1	10	547	488	14558	0.989412
4916	Melanogenesis	XM_021623518.1;NM_001281323.1	2	547	172	14558	0.989674
5205	Proteoglycans in cancer	XM_021588626.1	1	547	127	14558	0.992444
4060	Cytokine-cytokine receptor interaction	XM_021613379.1;XM_021613380.1;XM_021563084.1	3	547	243	14558	0.995221
4270	Vascular smooth muscle contraction	XM_021577276.1;XM_021577277.1;XM_021577278.1	3	547	245	14558	0.995513
4068	FoxO signaling pathway	XM_021601018.1;XM_021601019.1;XM_021624366.1;XM_021618797.1;XM_021574463.1;XM_021624365.1;XM_021566127.1	7	547	418	14558	0.996096
4914	Progesterone-mediated oocyte maturation	XM_021620354.1;XM_021574463.1	2	547	202	14558	0.996279
5203	Viral carcinogenesis	XM_021618797.1	1	547	158	14558	0.997722
4330	Notch signaling pathway	XM_021584634.1;XM_021616305.1	2	547	217	14558	0.997784
5410	Hypertrophic cardiomyopathy (HCM)	XM_021571098.1	1	547	160	14558	0.997892
5414	Dilated cardiomyopathy (DCM)	XM_021571098.1	1	547	162	14558	0.998049
4146	Peroxisome	XM_021598719.1	1	547	177	14558	0.998909
4933	AGE-RAGE signaling pathway in diabetic complications	XM_021574463.1;XM_021566127.1	2	547	238	14558	0.998935
4920	Adipocytokine signaling pathway	XM_021574463.1	1	547	178	14558	0.998951
4912	GnRH signaling pathway	XM_021585985.1	1	547	180	14558	0.999029
4390	Hippo signaling pathway	XM_021603378.1	1	547	182	14558	0.999101
5202	Transcriptional misregulation in cancer	XM_021618528.1;XM_021583804.1;XM_021583803.1;XM_021579706.1	4	547	350	14558	0.999279
4015	Rap1 signaling pathway	XM_021563544.1	1	547	192	14558	0.99939
4014	Ras signaling pathway	XM_021571115.1	1	547	205	14558	0.999632
4080	Neuroactive ligand-receptor interaction	XM_021581912.1;XM_021624454.1;XM_021618266.1;XM_021622667.1;XM_021618267.1	5	547	488	14558	0.999958

## Sheet: Cluster 29
pathway_id	pathway_name	Genes	S gene number	TS gene number	B gene number	TB gene number	pvalue
563	Glycosylphosphatidylinositol (GPI)-anchor biosynthesis	XM_021599211.1;XM_021606050.1;XM_021606056.1;XM_021606049.1;XM_021606053.1;XM_021606052.1;XM_021606048.1;XM_021606047.1;XM_021606054.1;XM_021606046.1;XM_021606055.1;XM_021596803.1;XM_021606045.1;XM_021606058.1;XM_021596793.1;XM_021599210.1;XM_021584347.1;XM_021599213.1;XM_021606051.1;XM_021596801.1;XM_021599212.1	21	1255	45	14558	1.89206e-11
4810	Regulation of actin cytoskeleton	XM_021591038.1;XM_021582456.1;XM_021582465.1;XM_021582461.1;XM_021563852.1;XM_021582484.1;XM_021582478.1;XM_021614931.1;XM_021605927.1;XM_021582467.1;XM_021582468.1;XM_021570236.1;XM_021599687.1;XM_021605936.1;XM_021571184.1;XM_021591042.1;XM_021582475.1;XM_021587584.1;XM_021582464.1;XM_021563849.1;XM_021582463.1;XM_021582483.1;XM_021597560.1;XM_021593316.1;XM_021591045.1;XM_021597586.1;XM_021605…	107	1255	648	14558	2.47614e-11
4660	T cell receptor signaling pathway	XM_021612724.1;XM_021612712.1;XM_021612730.1;XM_021612710.1;XM_021612709.1;XM_021612714.1;XM_021612719.1;XM_021607333.1;XM_021612713.1;XM_021612731.1;XM_021612728.1;XM_021612725.1;XM_021612716.1;XM_021612711.1;XM_021612961.1;XM_021612717.1;XM_021612722.1;XM_021612726.1;XM_021612729.1;XM_021612715.1;XM_021612727.1;XM_021612718.1;XM_021612723.1;XM_021612721.1	24	1255	59	14558	2.58897e-11
3013	RNA transport	XM_021587184.1;XM_021609711.1;XM_021569499.1;XM_021589021.1;XM_021609734.1;XM_021569501.1;XM_021609737.1;XM_021569505.1;XM_021569512.1;XM_021569508.1;XM_021623725.1;XM_021609714.1;XM_021609712.1;XM_021569500.1;XM_021610336.1;XM_021609730.1;XM_021614941.1;XM_021569502.1;XM_021569509.1;XM_021609741.1;XM_021587183.1;XM_021609715.1;XM_021609740.1;XM_021610335.1;XM_021610337.1;XM_021610334.1;XM_021609…	65	1255	341	14558	7.11128e-10
5203	Viral carcinogenesis	XM_021558197.1;XM_021612728.1;XM_021598280.1;XM_021598247.1;XM_021558195.1;XM_021612717.1;XM_021612714.1;XM_021612730.1;XM_021612724.1;XM_021598298.1;XM_021558192.1;XM_021566308.1;XM_021598254.1;XM_021612716.1;XM_021612713.1;XM_021558194.1;XM_021612718.1;XM_021612727.1;XM_021612723.1;XM_021612722.1;XM_021623237.1;XM_021612711.1;XM_021558193.1;XM_021612731.1;XM_021612709.1;XM_021612729.1;XM_021625…	36	1255	158	14558	4.68356e-08
4622	RIG-I-like receptor signaling pathway	XM_021583790.1;XM_021578864.1;XM_021608639.1;XM_021578863.1;XM_021608637.1;XM_021578860.1;XM_021608642.1;XM_021597970.1;XM_021578194.1;XM_021608634.1;XM_021583791.1;XM_021608635.1;XM_021597969.1;XM_021578862.1;XM_021578859.1;XM_021578861.1;XM_021578867.1;XM_021608638.1;XM_021608643.1;XM_021597968.1;XM_021597966.1;XM_021608644.1;XM_021578865.1;XM_021578868.1;XM_021608641.1;XM_021608630.1;XM_021608…	31	1255	128	14558	9.14735e-08
3015	mRNA surveillance pathway	XM_021613222.1;XM_021625489.1;XM_021613220.1;XM_021601977.1;XM_021612650.1;XM_021622805.1;XM_021558363.1;XM_021577886.1;XM_021582886.1;XM_021622801.1;XM_021622804.1;XM_021599690.1;XM_021599691.1;XM_021599689.1;XM_021601978.1;XM_021613223.1;XM_021612648.1;XM_021622802.1;XM_021599688.1;XM_021587309.1;XM_021620085.1;XM_021558362.1;XM_021589021.1;XM_021622796.1;XM_021622808.1;XM_021582885.1;XM_021612…	42	1255	221	14558	8.01288e-07
4390	Hippo signaling pathway	XM_021612725.1;XM_021612714.1;XM_021591607.1;XM_021612721.1;XM_021612723.1;XM_021612713.1;XM_021612711.1;XM_021612719.1;XM_021612724.1;XM_021612712.1;XM_021591606.1;XM_021612731.1;XM_021612729.1;XM_021591608.1;XM_021612715.1;XM_021598221.1;XM_021598289.1;XM_021612726.1;XM_021612727.1;XM_021612710.1;XM_021567812.1;XM_021591604.1;XM_021567798.1;XM_021570010.1;XM_021612717.1;XM_021612730.1;XM_021612…	35	1255	182	14558	4.93524e-06
4120	Ubiquitin mediated proteolysis	XM_021608561.1;XM_021608560.1;XM_021573977.1;XM_021573983.1;XM_021597718.1;XM_021556536.1;XM_021601930.1;XM_021601926.1;XM_021610766.1;XM_021601932.1;XM_021596266.1;XM_021573981.1;XM_021601931.1;XM_021600826.1;XM_021573982.1;XM_021608555.1;XM_021563294.1;XM_021562870.1;XM_021563293.1;XM_021573978.1;XM_021585204.1;XM_021604856.1;XM_021557856.1;XM_021608556.1;XM_021573979.1;XM_021601935.1;XM_021601…	59	1255	381	14558	6.74018e-06
4064	NF-kappa B signaling pathway	XM_021608641.1;XM_021608640.1;XM_021608643.1;XM_021608642.1;XM_021608631.1;XM_021608633.1;XM_021608638.1;XM_021608639.1;XM_021608632.1;XM_021608634.1;XM_021608644.1;XM_021608635.1;XM_021608637.1;XM_021608630.1	14	1255	46	14558	2.00506e-05
5164	Influenza A	XM_021612961.1;XM_021571041.1;XM_021608633.1;XM_021608637.1;XM_021608641.1;XM_021566203.1;XM_021566202.1;XM_021618696.1;XM_021608644.1;XM_021608638.1;XM_021608635.1;XM_021591325.1;XM_021608630.1;XM_021618699.1;XM_021608642.1;XM_021618697.1;XM_021608631.1;XM_021608640.1;XM_021618693.1;XM_021608643.1;XM_021608634.1;XM_021618694.1;XM_021571040.1;XM_021618695.1;XM_021608632.1;XM_021608639.1;XM_021566…	27	1255	135	14558	2.81076e-05
5166	Human T-cell leukemia virus 1 infection	XM_021608254.1;XM_021612731.1;XM_021588931.1;XM_021612709.1;XM_021612716.1;XM_021612712.1;XM_021612718.1;XM_021612727.1;XM_021612726.1;XM_021612719.1;XM_021612724.1;XM_021612711.1;XM_021612961.1;XM_021613938.1;XM_021612728.1;XM_021612722.1;XM_021612710.1;XM_021612725.1;XM_021588930.1;XM_021612715.1;XM_021608259.1;XM_021612713.1;XM_021612729.1;XM_021612717.1;XM_021612714.1;XM_021612723.1;XM_021612…	29	1255	151	14558	3.19996e-05
3430	Mismatch repair	XM_021602639.1;XM_021602641.1;XM_021602637.1;XM_021602638.1;XM_021602644.1;XM_021602645.1;XM_021602643.1;XM_021602642.1	8	1255	18	14558	5.94303e-05
5134	Legionellosis	XM_021559492.1;XM_021559493.1;XM_021571646.1;XM_021571644.1;XM_021586504.1;XM_021571645.1;XM_021559490.1;XM_021586505.1;XM_021577867.1;XM_021559491.1;XM_021559489.1;XM_021618918.1;XM_021618919.1;XM_021618920.1	14	1255	52	14558	9.0506e-05
4966	Collecting duct acid secretion	XM_021562704.1;XM_021586594.1;XM_021562706.1;XM_021562705.1;XM_021562702.1;XM_021562703.1;XM_021562701.1;XM_021586595.1	8	1255	20	14558	0.000146275
564	Glycerophospholipid metabolism	XM_021577385.1;XM_021576357.1;XM_021576354.1;XM_021585853.1;XM_021571873.1;XM_021576361.1;XM_021571874.1;XM_021607318.1;XM_021576352.1;XM_021576356.1;XM_021607307.1;XM_021576351.1;XM_021568723.1;XM_021607313.1;XM_021576350.1;XM_021576355.1;XM_021607308.1;XM_021607311.1;XM_021607303.1;XM_021607305.1;XM_021607306.1;XM_021607310.1;XM_021607319.1;XM_021607316.1;XM_021607315.1;XM_021576359.1;XM_021576…	32	1255	190	14558	0.000179714
4013	MAPK signaling pathway - fly	XM_021607224.1;XM_021607219.1;XM_021607220.1;XM_021607221.1;XM_021607222.1;XM_021607223.1	6	1255	12	14558	0.000237626
4110	Cell cycle	XM_021602638.1;XM_021603177.1;XM_021566341.1;XM_021602645.1;XM_021573076.1;XM_021568372.1;XM_021566344.1;XM_021578639.1;XM_021602641.1;XM_021566346.1;XM_021602637.1;XM_021602643.1;XM_021566349.1;XM_021566347.1;XM_021613950.1;XM_021566353.1;XM_021566345.1;XM_021602642.1;XM_021602639.1;XM_021566350.1;XM_021566336.1;XM_021623335.1;XM_021566342.1;XM_021623334.1;XM_021566338.1;XM_021623336.1;XM_021566…	38	1255	255	14558	0.00060845
3460	Fanconi anemia pathway	XM_021575955.1;XM_021588127.1;XM_021575953.1;XM_021610766.1;XM_021575957.1;XM_021575954.1;XM_021575958.1;XM_021575959.1;XM_021567812.1;XM_021567791.1;XM_021558276.1;XM_021610759.1;XM_021567798.1;XM_021575956.1	14	1255	66	14558	0.00126781
4115	p53 signaling pathway	XM_021576963.1;XM_021566350.1;XM_021609809.1;XM_021566345.1;XM_021566349.1;XM_021566353.1;XM_021566337.1;XM_021566343.1;XM_021566346.1;XM_021566354.1;XM_021609807.1;XM_021615147.1;XM_021617223.1;XM_021566339.1;XM_021586504.1;XM_021609808.1;XM_021619054.1;XM_021566344.1;XM_021566342.1;XM_021566348.1;XM_021586505.1;XM_021566341.1;XM_021566338.1;XM_021566336.1;XM_021583309.1;XM_021566352.1;XM_021583…	28	1255	186	14558	0.0025825
5030	Cocaine addiction	XM_021590947.1;XM_021588834.1;XM_021588827.1;XM_021588830.1;XM_021588828.1;XM_021588831.1;XM_021590946.1;XM_021590948.1;XM_021588829.1;XM_021588833.1	10	1255	43	14558	0.00300151
4114	Oocyte meiosis	XM_021601162.1;XM_021601978.1;XM_021587309.1;XM_021566337.1;XM_021566346.1;XM_021566341.1;XM_021566350.1;XM_021578639.1;XM_021566343.1;XM_021566354.1;XM_021599691.1;XM_021599690.1;XM_021601977.1;XM_021566338.1;XM_021599689.1;XM_021566352.1;XM_021566336.1;XM_021586893.1;XM_021566344.1;XM_021624161.1;XM_021566348.1;XM_021599688.1;XM_021566339.1;XM_021566342.1;XM_021566347.1;XM_021566349.1;XM_021566…	31	1255	215	14558	0.0031132
565	Ether lipid metabolism	XM_021576351.1;XM_021576357.1;XM_021576356.1;XM_021565669.1;XM_021564695.1;XM_021576352.1;XM_021576354.1;XM_021576353.1;XM_021568723.1;XM_021576355.1;XM_021576361.1;XM_021564680.1;XM_021576360.1;XM_021576359.1;XM_021576350.1;XM_021564689.1	16	1255	88	14558	0.00322164
3030	DNA replication	XM_021602639.1;XM_021602641.1;XM_021602638.1;XM_021602644.1;XM_021602643.1;XM_021602642.1;XM_021602645.1;XM_021602637.1	8	1255	31	14558	0.00389648
3018	RNA degradation	XM_021602313.1;XM_021602285.1;XM_021591554.1;XM_021591547.1;XM_021576179.1;XM_021571764.1;XM_021602338.1;XM_021602294.1;XM_021566153.1;XM_021576181.1;XM_021602379.1;XM_021576182.1;XM_021602304.1;XM_021602277.1;XM_021602323.1;XM_021602430.1;XM_021602371.1;XM_021602396.1;XM_021602269.1;XM_021566152.1;XM_021602388.1;XM_021591578.1;XM_021602416.1;XM_021562413.1;XM_021602330.1;XM_021604734.1;XM_021602…	31	1255	219	14558	0.00412233
4144	Endocytosis	XM_021606406.1;XM_021587585.1;XM_021613945.1;XM_021576968.1;XM_021571477.1;XM_021585742.1;XM_021602732.1;XM_021568950.1;XM_021585743.1;XM_021599197.1;XM_021585744.1;XM_021607352.1;XM_021571475.1;XM_021581650.1;XM_021625640.1;XM_021568947.1;XM_021585936.1;XM_021588195.1;XM_021568942.1;XM_021605724.1;XM_021602737.1;XM_021585741.1;XM_021609267.1;XM_021604049.1;XM_021571663.1;XM_021588199.1;XM_021585…	99	1255	897	14558	0.00579834
4670	Leukocyte transendothelial migration	XM_021590431.1;XM_021590426.1;XM_021601176.1;XM_021590428.1;XM_021614931.1;XM_021590423.1;XM_021590429.1;XM_021590427.1;XM_021590424.1	9	1255	41	14558	0.00715183
3410	Base excision repair	XM_021602645.1;XM_021602644.1;XM_021602642.1;XM_021563236.1;XM_021602641.1;XM_021602639.1;XM_021602637.1;XM_021617646.1;XM_021602643.1;XM_021602638.1	10	1255	51	14558	0.0106764
3420	Nucleotide excision repair	XM_021567791.1;XM_021602639.1;XM_021602642.1;XM_021602645.1;XM_021602644.1;XM_021567812.1;XM_021602641.1;XM_021567798.1;XM_021602638.1;XM_021602637.1;XM_021584201.1;XM_021602643.1	12	1255	69	14558	0.0141402
983	Drug metabolism - other enzymes	XM_021564021.1;XM_021589288.1;XM_021564017.1;XM_021564022.1;XM_021564016.1;XM_021589290.1;XM_021564023.1;XM_021564019.1;XM_021564018.1	9	1255	46	14558	0.0152719
1212	Fatty acid metabolism	XM_021607999.1;XM_021621483.1;XM_021576227.1;XM_021602083.1;XM_021621484.1;XM_021571860.1;XM_021571859.1;XM_021576226.1;XM_021621481.1;XM_021621482.1;XM_021557213.1;XM_021597449.1;XM_021557214.1;XM_021576228.1	14	1255	89	14558	0.0196749
5152	Tuberculosis	XM_021618433.1;XM_021618431.1;XM_021618432.1;XM_021607394.1;XM_021607391.1;XM_021612961.1;XM_021618434.1;XM_021607392.1;XM_021600627.1;XM_021586504.1;XM_021607390.1;XM_021607393.1;XM_021577867.1;XM_021586505.1	14	1255	89	14558	0.0196749
4922	Glucagon signaling pathway	XM_021587310.1;XM_021557399.1;XM_021557400.1;XM_021601773.1;XM_021557401.1;XM_021557397.1;XM_021557395.1;XM_021612961.1;XM_021557398.1;XM_021601774.1	10	1255	57	14558	0.0226167
5202	Transcriptional misregulation in cancer	XM_021624806.1;XM_021588930.1;XM_021591117.1;XM_021574968.1;XM_021611038.1;XM_021591147.1;XM_021602645.1;XM_021591120.1;XM_021602641.1;XM_021577914.1;XM_021623081.1;XM_021591118.1;XM_021602643.1;XM_021623083.1;XM_021611036.1;XM_021602639.1;XM_021565977.1;XM_021591119.1;XM_021577653.1;XM_021565167.1;XM_021609496.1;XM_021603067.1;XM_021609497.1;XM_021623082.1;XM_021621661.1;XM_021602642.1;XM_021565…	41	1255	350	14558	0.0269974
61	Fatty acid biosynthesis	XM_021621482.1;XM_021621481.1;XM_021576226.1;XM_021576227.1;XM_021576228.1;XM_021621483.1;XM_021621484.1	7	1255	35	14558	0.0275277
5222	Small cell lung cancer	XM_021569212.1;XM_021612961.1;XM_021569213.1;XM_021586504.1;XM_021586505.1;XM_021609985.1;XM_021615467.1;XM_021616770.1	8	1255	43	14558	0.028617
5010	Alzheimer disease	XM_021609748.1;XM_021603400.1;XM_021587172.1;XM_021580230.1;XM_021586505.1;XM_021587173.1;XM_021586504.1;XM_021609749.1;XM_021603402.1;XM_021565892.1;XM_021580229.1;XM_021580231.1	12	1255	76	14558	0.0286661
4010	MAPK signaling pathway	XM_021608639.1;XM_021608640.1;XM_021625781.1;XM_021584590.1;XM_021608632.1;XM_021605936.1;XM_021605932.1;XM_021591545.1;XM_021608777.1;XM_021608635.1;XM_021584589.1;XM_021608638.1;XM_021567172.1;XM_021565605.1;XM_021581379.1;XM_021605929.1;XM_021571663.1;XM_021598370.1;XM_021623150.1;XM_021605934.1;XM_021565608.1;XM_021587711.1;XM_021623149.1;XM_021571969.1;XM_021571664.1;XM_021578194.1;XM_021605…	80	1255	754	14558	0.0292654
4212	Longevity regulating pathway - worm	XM_021582382.1;XM_021625781.1;XM_021576181.1;XM_021576182.1;XM_021576179.1	5	1255	24	14558	0.050531
310	Lysine degradation	XM_021610337.1;XM_021590760.1;XM_021610335.1;XM_021590763.1;XM_021590755.1;XM_021589339.1;XM_021590757.1;NM_001124530.1;XM_021610334.1;XM_021590759.1;XM_021590758.1;XM_021590764.1;XM_021590756.1;XM_021590762.1;XM_021610336.1	15	1255	111	14558	0.0537436
4391	Hippo signaling pathway - fly	XM_021571669.1;XM_021569341.1;XM_021569343.1;XM_021596801.1;XM_021596803.1;XM_021571672.1;XM_021557542.1;XM_021560974.1;XM_021569342.1;XM_021571670.1;XM_021557541.1;XM_021596793.1;XM_021571671.1;XM_021584041.1;XM_021573569.1;XM_021569344.1	16	1255	121	14558	0.0559846
534	Glycosaminoglycan biosynthesis - heparan sulfate / heparin	XM_021586459.1;XM_021591569.1;XM_021612297.1;XM_021618905.1;XM_021591570.1;XM_021591568.1;XM_021591567.1;XM_021586460.1	8	1255	51	14558	0.0688579
4142	Lysosome	XM_021588198.1;XM_021556536.1;XM_021600432.1;XM_021588199.1;XM_021612567.1;XM_021612566.1;XM_021612570.1;XM_021611633.1;XM_021618054.1;XM_021583572.1;XM_021588197.1;XM_021583570.1;XM_021616040.1;XM_021584601.1;XM_021571860.1;XM_021556532.1;XM_021571859.1;XM_021616038.1;XM_021588196.1;XM_021612571.1;XM_021576963.1;XM_021613829.1;XM_021564784.1;XM_021612569.1;XM_021612568.1;XM_021616039.1;XM_021588…	28	1255	243	14558	0.0698108
4668	TNF signaling pathway	XM_021604589.1;XM_021604563.1;XM_021604580.1;XM_021604597.1;XM_021604572.1;XM_021604605.1;XM_021612961.1;XM_021600627.1	8	1255	52	14558	0.0755296
250	Alanine, aspartate and glutamate metabolism	XM_021596986.1;XM_021580359.1;XM_021612045.1;XM_021605975.1;XM_021596982.1;XM_021580360.1;XM_021599445.1;XM_021599446.1;XM_021607080.1	9	1255	61	14558	0.076529
4152	AMPK signaling pathway	XM_021579123.1;XM_021579117.1;XM_021624562.1;XM_021579121.1;XM_021612961.1;XM_021624561.1;XM_021579118.1;XM_021579122.1;XM_021579120.1;XM_021579116.1;XM_021579119.1	11	1255	80	14558	0.0812797
471	D-Glutamine and D-glutamate metabolism	XM_021596982.1;XM_021596986.1;XM_021580360.1;XM_021580359.1	4	1255	20	14558	0.0877019
5012	Parkinson disease	XM_021580565.1;XM_021576777.1;XM_021586504.1;XM_021569442.1;XM_021586505.1	5	1255	28	14558	0.0881912
760	Nicotinate and nicotinamide metabolism	XM_021622925.1;XM_021558868.1;XM_021601371.1;XM_021565281.1;XM_021565280.1;XM_021558873.1;XM_021565283.1	7	1255	45	14558	0.0887117
71	Fatty acid degradation	XM_021621484.1;XM_021607999.1;XM_021621481.1;XM_021557213.1;XM_021557214.1;XM_021602083.1;XM_021621482.1;XM_021621483.1	8	1255	54	14558	0.0899974
4914	Progesterone-mediated oocyte maturation	XM_021613950.1;XM_021566354.1;XM_021566337.1;XM_021566341.1;XM_021612961.1;XM_021606402.1;XM_021566339.1;XM_021566343.1;XM_021566348.1;XM_021586468.1;XM_021566352.1;XM_021566353.1;XM_021566336.1;XM_021566350.1;XM_021566338.1;XM_021566346.1;XM_021566344.1;XM_021578639.1;XM_021566342.1;XM_021566347.1;XM_021566349.1;XM_021624161.1;XM_021566345.1	23	1255	202	14558	0.102681
5340	Primary immunodeficiency	XM_021607393.1;XM_021607391.1;XM_021607390.1;XM_021607392.1;XM_021607394.1	5	1255	31	14558	0.123763
4614	Renin-angiotensin system	XM_021587172.1;XM_021609749.1;XM_021587173.1;XM_021609748.1	4	1255	23	14558	0.131119
4920	Adipocytokine signaling pathway	XM_021624562.1;XM_021621484.1;XM_021583790.1;XM_021565606.1;XM_021560554.1;XM_021621481.1;XM_021560553.1;XM_021621482.1;XM_021612961.1;XM_021624561.1;XM_021607999.1;XM_021565608.1;XM_021578010.1;XM_021578194.1;XM_021578195.1;XM_021565605.1;XM_021583791.1;XM_021572013.1;XM_021621483.1;XM_021568513.1	20	1255	178	14558	0.133381
4320	Dorso-ventral axis formation	XM_021624161.1;XM_021572624.1;XM_021572623.1;XM_021565720.1;XM_021607222.1;XM_021622802.1;XM_021572626.1;XM_021572628.1;XM_021622806.1;XM_021622800.1;XM_021622798.1;XM_021621076.1;XM_021607221.1;XM_021572622.1;XM_021572627.1;XM_021607223.1;XM_021622805.1;XM_021607224.1;XM_021621178.1;XM_021622796.1;XM_021607219.1;XM_021622808.1;XM_021622803.1;XM_021622799.1;XM_021607220.1;XM_021603934.1;XM_021622…	29	1255	272	14558	0.136247
232	Caffeine metabolism	XM_021589290.1;XM_021589288.1	2	1255	8	14558	0.146881
920	Sulfur metabolism	XM_021605925.1;XM_021564763.1;XM_021605923.1	3	1255	16	14558	0.15436
261	Monobactam biosynthesis	XM_021564763.1	1	1255	2	14558	0.164988
4711	Circadian rhythm - fly	XM_021562001.1;XM_021589761.1;XM_021589752.1	3	1255	17	14558	0.176124
5145	Toxoplasmosis	XM_021609985.1;XM_021569213.1;XM_021569212.1;XM_021612961.1;XM_021615467.1	5	1255	35	14558	0.17965
4510	Focal adhesion	XM_021601977.1;XM_021571969.1;XM_021597570.1;XM_021614931.1;XM_021599688.1;XM_021597560.1;XM_021607756.1;XM_021585206.1;XM_021591579.1;XM_021563849.1;XM_021591040.1;XM_021621076.1;XM_021609267.1;XM_021599690.1;XM_021591042.1;XM_021607752.1;XM_021607751.1;XM_021572409.1;XM_021581832.1;XM_021571968.1;XM_021588974.1;XM_021591043.1;XM_021599687.1;XM_021615467.1;XM_021581833.1;XM_021581411.1;XM_021601…	60	1255	619	14558	0.183488
4070	Phosphatidylinositol signaling system	XM_021607306.1;XM_021607308.1;XM_021607307.1;XM_021607303.1;XM_021593316.1;XM_021607319.1;XM_021601162.1;XM_021607313.1;XM_021586115.1;XM_021607318.1;XM_021572087.1;XM_021565403.1;XM_021585853.1;XM_021618368.1;XM_021607305.1;XM_021607310.1;XM_021607272.1;XM_021588862.1;XM_021607316.1;XM_021583794.1;XM_021607312.1;XM_021620007.1;XM_021597414.1;XM_021622868.1;XM_021607311.1;XM_021588870.1;XM_021618…	30	1255	295	14558	0.194663
5168	Herpes simplex virus 1 infection	XM_021566348.1;XM_021610529.1;XM_021601976.1;XM_021566347.1;XM_021566354.1;XM_021566339.1;XM_021566336.1;XM_021599691.1;XM_021619054.1;XM_021604891.1;XM_021566343.1;XM_021565606.1;XM_021566353.1;XM_021566337.1;XM_021565605.1;XM_021587663.1;XM_021610530.1;XM_021566352.1;XM_021578194.1;XM_021610531.1;XM_021566344.1;XM_021565608.1;XM_021599687.1;XM_021599690.1;XM_021566350.1;XM_021566341.1;XM_021566…	38	1255	383	14558	0.201857
4630	Jak-STAT signaling pathway	XM_021562193.1;XM_021601926.1;XM_021601927.1;XM_021608249.1;XM_021601930.1;XM_021607222.1;XM_021562197.1;XM_021562195.1;XM_021607219.1;XM_021582616.1;XM_021607221.1;XM_021607224.1;XM_021621076.1;XM_021601932.1;XM_021612961.1;XM_021608250.1;XM_021607223.1;XM_021601929.1;XM_021562194.1;NM_001146167.1;XM_021607220.1;XM_021601934.1;XM_021622524.1;XM_021601928.1;XM_021601931.1;XM_021601935.1;XM_021562…	28	1255	276	14558	0.208037
5014	Amyotrophic lateral sclerosis (ALS)	XM_021586504.1;XM_021571764.1;XM_021586505.1	3	1255	19	14558	0.22184
220	Arginine biosynthesis	XM_021580359.1;XM_021596982.1;XM_021580360.1;XM_021607080.1;XM_021596986.1	5	1255	38	14558	0.226633
4640	Hematopoietic cell lineage	XM_021609749.1;XM_021587173.1;XM_021587172.1;XM_021577867.1;XM_021609748.1	5	1255	38	14558	0.226633
5146	Amoebiasis	XM_021569212.1;XM_021615467.1;XM_021609985.1;XM_021569213.1	4	1255	29	14558	0.237196
4520	Adherens junction	XM_021605934.1;XM_021571966.1;XM_021596646.1;XM_021571663.1;XM_021571967.1;XM_021621899.1;XM_021596647.1;XM_021605933.1;XM_021596648.1;XM_021621895.1;XM_021561264.1;XM_021596643.1;XM_021621902.1;XM_021571968.1;XM_021605932.1;XM_021621908.1;XM_021596649.1;XM_021621894.1;XM_021621901.1;XM_021601176.1;XM_021605930.1;XM_021609267.1;XM_021621906.1;XM_021621897.1;XM_021621896.1;XM_021561265.1;XM_021605…	42	1255	437	14558	0.249843
5161	Hepatitis B	XM_021586505.1;XM_021612961.1;XM_021586504.1;XM_021607333.1	4	1255	30	14558	0.256572
4068	FoxO signaling pathway	XM_021607224.1;XM_021606402.1;XM_021605214.1;XM_021571031.1;XM_021571034.1;XM_021571663.1;XM_021571033.1;XM_021599800.1;XM_021607222.1;XM_021566337.1;XM_021566341.1;XM_021566349.1;XM_021566347.1;XM_021566336.1;XM_021566354.1;XM_021566353.1;XM_021566350.1;XM_021582382.1;XM_021607221.1;XM_021566343.1;XM_021625781.1;XM_021566346.1;XM_021566342.1;XM_021607220.1;XM_021566344.1;XM_021566352.1;XM_021566…	40	1255	418	14558	0.265294
4146	Peroxisome	XM_021589691.1;XM_021621482.1;XM_021557213.1;XM_021557214.1;XM_021588242.1;XM_021625507.1;XM_021574759.1;XM_021588243.1;XM_021621200.1;XM_021621483.1;XM_021589288.1;XM_021559563.1;XM_021625504.1;XM_021621481.1;XM_021587663.1;XM_021625506.1;XM_021621484.1;XM_021589290.1	18	1255	177	14558	0.265344
4918	Thyroid hormone synthesis	XM_021576285.1;XM_021576286.1;XM_021576284.1	3	1255	21	14558	0.269549
531	Glycosaminoglycan degradation	XM_021616040.1;XM_021616038.1;XM_021583570.1;XM_021616039.1;XM_021583572.1	5	1255	41	14558	0.276712
5132	Salmonella infection	XM_021616224.1;XM_021578194.1;XM_021567172.1;XM_021578195.1;XM_021566374.1;XM_021566373.1;XM_021571967.1;XM_021566372.1;XM_021597154.1;XM_021571968.1;XM_021616225.1;XM_021571969.1;XM_021583791.1;XM_021616223.1;XM_021583790.1;XM_021588649.1;XM_021571966.1	17	1255	169	14558	0.288141
4931	Insulin resistance	XM_021608906.1;XM_021568339.1;XM_021568337.1;XM_021606044.1;XM_021599691.1;XM_021599687.1;XM_021619164.1;XM_021568338.1;XM_021606041.1;XM_021565606.1;XM_021606040.1;XM_021565608.1;XM_021612961.1;XM_021565605.1;XM_021607999.1;XM_021599688.1;XM_021599800.1;XM_021578195.1;XM_021583791.1;XM_021564818.1;XM_021568336.1;XM_021568342.1;XM_021583790.1;XM_021603407.1;XM_021601978.1;XM_021580134.1;XM_021605…	41	1255	435	14558	0.295764
970	Aminoacyl-tRNA biosynthesis	XM_021556129.1;XM_021584352.1;XM_021584351.1;XM_021558132.1	4	1255	34	14558	0.336411
5144	Malaria	XM_021577867.1;XM_021565892.1	2	1255	14	14558	0.343122
3040	Spliceosome	XM_021589021.1;XM_021572715.1;NM_001165119.1;XM_021577886.1;XM_021623335.1;XM_021600616.1;XM_021590125.1;XM_021587663.1;XM_021606679.1;XM_021590912.1;XM_021623334.1;XM_021606681.1;XM_021623336.1;XM_021561486.1;XM_021582404.1;XM_021600617.1;XM_021561494.1;XM_021606682.1;XM_021614941.1;XM_021606677.1;XM_021601011.1;XM_021587853.1;XM_021606678.1;XM_021625995.1	24	1255	258	14558	0.37867
4214	Apoptosis - fly	XM_021601989.1;XM_021590549.1;XM_021590546.1;XM_021601990.1;XM_021590548.1	5	1255	47	14558	0.381591
4612	Antigen processing and presentation	XM_021607392.1;XM_021607391.1;XM_021607390.1;XM_021607394.1;XM_021607393.1	5	1255	47	14558	0.381591
5213	Endometrial cancer	XM_021612961.1	1	1255	6	14558	0.417836
5016	Huntington disease	XM_021611036.1;XM_021611037.1;XM_021586505.1;XM_021624993.1;XM_021611038.1;XM_021556236.1;XM_021586504.1	7	1255	72	14558	0.428362
4623	Cytosolic DNA-sensing pathway	XM_021578195.1;XM_021583791.1;XM_021625107.1;XM_021583790.1;XM_021625108.1;XM_021578194.1	6	1255	61	14558	0.431352
592	alpha-Linolenic acid metabolism	XM_021557214.1;XM_021557213.1	2	1255	17	14558	0.437716
5211	Renal cell carcinoma	XM_021612961.1;XM_021578539.1	2	1255	17	14558	0.437716
4910	Insulin signaling pathway	XM_021601977.1;XM_021612961.1;XM_021578010.1;XM_021621076.1;XM_021576227.1;XM_021619163.1;XM_021563295.1;XM_021562194.1;XM_021599688.1;XM_021598370.1;XM_021623598.1;XM_021599691.1;XM_021599689.1;XM_021562196.1;XM_021601976.1;XM_021623596.1;XM_021563294.1;XM_021599690.1;XM_021562193.1;XM_021586468.1;XM_021562197.1;XM_021588942.1;XM_021599800.1;XM_021608906.1;XM_021563293.1;XM_021578346.1;XM_021606…	36	1255	406	14558	0.455072
5220	Chronic myeloid leukemia	XM_021623560.1;XM_021582359.1;XM_021590794.1;XM_021612961.1	4	1255	40	14558	0.456633
5204	Chemical carcinogenesis	XM_021578539.1	1	1255	7	14558	0.468044
4912	GnRH signaling pathway	XM_021567942.1;XM_021601162.1;XM_021608777.1;XM_021581382.1;XM_021598370.1;XM_021621076.1;XM_021571968.1;XM_021571966.1;XM_021571967.1;XM_021564664.1;XM_021581378.1;XM_021564663.1;XM_021581379.1;XM_021581381.1;XM_021581380.1;XM_021571969.1	16	1255	180	14558	0.487379
53	Ascorbate and aldarate metabolism	XM_021570947.1;XM_021570948.1	2	1255	19	14558	0.496509
5140	Leishmaniasis	XM_021577867.1	1	1255	8	14558	0.513924
5214	Glioma	XM_021612961.1	1	1255	8	14558	0.513924
4066	HIF-1 signaling pathway	XM_021612961.1;XM_021564981.1;XM_021588942.1;XM_021578539.1	4	1255	43	14558	0.514136
5230	Central carbon metabolism in cancer	XM_021564981.1;XM_021616945.1;XM_021616946.1;XM_021612961.1	4	1255	44	14558	0.532676
4270	Vascular smooth muscle contraction	XM_021563849.1;XM_021599689.1;XM_021563851.1;XM_021598370.1;XM_021579175.1;XM_021601978.1;XM_021606402.1;XM_021599691.1;XM_021584963.1;XM_021601976.1;XM_021601162.1;XM_021563850.1;XM_021584964.1;XM_021599688.1;XM_021599690.1;XM_021601977.1;XM_021599687.1;XM_021563852.1;XM_021584962.1;XM_021609267.1;XM_021579174.1	21	1255	245	14558	0.544643
4130	SNARE interactions in vesicular transport	XM_021587843.1;XM_021565026.1;XM_021559884.1;XM_021587842.1;XM_021565025.1	5	1255	57	14558	0.551935
4919	Thyroid hormone signaling pathway	XM_021618034.1;XM_021612961.1;XM_021578852.1;XM_021571825.1;XM_021600536.1;XM_021578851.1;XM_021590259.1	7	1255	81	14558	0.554761
4974	Protein digestion and absorption	XM_021604592.1;XM_021587173.1;XM_021606572.1;XM_021609748.1;XM_021599657.1;XM_021609749.1;XM_021611653.1;XM_021587172.1;XM_021620500.1;XM_021600261.1	10	1255	117	14558	0.559445
4932	Non-alcoholic fatty liver disease (NAFLD)	XM_021624562.1;XM_021624561.1;XM_021612961.1	3	1255	34	14558	0.571061
860	Porphyrin and chlorophyll metabolism	XM_021584352.1;XM_021584351.1	2	1255	22	14558	0.576964
4122	Sulfur relay system	XM_021605925.1;XM_021605923.1	2	1255	22	14558	0.576964
910	Nitrogen metabolism	XM_021580359.1;XM_021580360.1	2	1255	22	14558	0.576964
20	Citrate cycle (TCA cycle)	XM_021581214.1;XM_021600666.1;XM_021587076.1;XM_021600676.1	4	1255	47	14558	0.586061
4973	Carbohydrate digestion and absorption	XM_021612961.1	1	1255	10	14558	0.594163
4015	Rap1 signaling pathway	XM_021590429.1;XM_021590424.1;XM_021584790.1;XM_021583930.1;XM_021590431.1;XM_021590426.1;XM_021572818.1;XM_021601176.1;XM_021614931.1;XM_021590427.1;XM_021590423.1;XM_021557383.1;XM_021612961.1;XM_021568226.1;XM_021590428.1;XM_021557382.1	16	1255	192	14558	0.594586
4978	Mineral absorption	XM_021561788.1;XM_021597154.1;XM_021620563.1;XM_021620566.1;XM_021620564.1;XM_021620565.1	6	1255	72	14558	0.595871
100	Steroid biosynthesis	XM_021600665.1;XM_021564784.1	2	1255	23	14558	0.601605
4915	Estrogen signaling pathway	XM_021611036.1;XM_021611037.1;XM_021612961.1;XM_021611038.1	4	1255	48	14558	0.603047
1040	Biosynthesis of unsaturated fatty acids	XM_021557214.1;XM_021557213.1;XM_021597449.1	3	1255	36	14558	0.610645
4621	NOD-like receptor signaling pathway	XM_021590739.1;XM_021578194.1;XM_021600627.1;XM_021569864.1;XM_021569866.1;XM_021615067.1;XM_021569865.1;XM_021583791.1;XM_021615069.1;XM_021578195.1;XM_021615066.1;XM_021569863.1;XM_021615068.1;XM_021583790.1	14	1255	170	14558	0.611557
4215	Apoptosis - multiple species	XM_021580565.1;XM_021625781.1;XM_021586504.1;XM_021586505.1	4	1255	49	14558	0.619603
5215	Prostate cancer	XM_021612961.1	1	1255	11	14558	0.629173
4210	Apoptosis	XM_021586505.1;XM_021580565.1;XM_021612961.1;XM_021586504.1;XM_021576963.1	5	1255	63	14558	0.6424
4962	Vasopressin-regulated water reabsorption	XM_021608243.1;XM_021608248.1	2	1255	25	14558	0.647591
62	Fatty acid elongation	XM_021571859.1;XM_021571860.1;XM_021597449.1	3	1255	38	14558	0.647704
4933	AGE-RAGE signaling pathway in diabetic complications	XM_021571967.1;XM_021605064.1;XM_021565403.1;XM_021625781.1;XM_021571663.1;XM_021571664.1;XM_021612961.1;XM_021620007.1;XM_021557544.1;XM_021571966.1;XM_021605214.1;XM_021619054.1;XM_021578195.1;XM_021583790.1;XM_021578194.1;XM_021571968.1;XM_021571969.1;XM_021581411.1;XM_021583791.1	19	1255	238	14558	0.67182
4211	Longevity regulating pathway	XM_021624561.1;XM_021624562.1;XM_021612961.1	3	1255	40	14558	0.682184
4071	Sphingolipid signaling pathway	XM_021570875.1;XM_021612961.1	2	1255	27	14558	0.689261
511	Other glycan degradation	XM_021584601.1;XM_021611633.1	2	1255	27	14558	0.689261
4917	Prolactin signaling pathway	XM_021612961.1	1	1255	13	14558	0.690399
900	Terpenoid backbone biosynthesis	XM_021602157.1	1	1255	13	14558	0.690399
562	Inositol phosphate metabolism	XM_021618369.1;XM_021565403.1;XM_021618368.1;XM_021588870.1;XM_021593310.1;XM_021593316.1;XM_021572087.1;XM_021622868.1;XM_021597414.1;XM_021607272.1;XM_021620007.1;XM_021588851.1;XM_021588862.1;XM_021564763.1;XM_021586115.1	15	1255	195	14558	0.715845
5162	Measles	XM_021585975.1;XM_021612961.1	2	1255	29	14558	0.726785
3320	PPAR signaling pathway	XM_021621483.1;XM_021624561.1;XM_021557214.1;XM_021621481.1;XM_021560553.1;XM_021624562.1;XM_021607999.1;XM_021621484.1;XM_021572013.1;XM_021621482.1;XM_021560554.1;XM_021557213.1	12	1255	160	14558	0.734607
514	Other types of O-glycan biosynthesis	XM_021569813.1;XM_021563238.1;XM_021569812.1;XM_021563239.1;XM_021566970.1;XM_021569814.1	6	1255	84	14558	0.741819
270	Cysteine and methionine metabolism	XM_021615717.1;XM_021605923.1;XM_021605925.1;XM_021567649.1;XM_021566510.1	5	1255	71	14558	0.743692
1210	2-Oxocarboxylic acid metabolism	XM_021581214.1;XM_021607080.1	2	1255	30	14558	0.744064
5231	Choline metabolism in cancer	XM_021611038.1;XM_021611036.1;XM_021611037.1;XM_021612961.1	4	1255	59	14558	0.760122
4512	ECM-receptor interaction	XM_021615467.1;XM_021588974.1;XM_021609985.1;XM_021565692.1;XM_021621415.1;XM_021591579.1;XM_021565691.1;XM_021581411.1;XM_021569213.1;XM_021572409.1;XM_021558832.1;XM_021557544.1;XM_021605064.1;XM_021564437.1;XM_021614332.1;XM_021569212.1;XM_021621416.1	17	1255	227	14558	0.763174
4213	Longevity regulating pathway - multiple species	XM_021612961.1;XM_021582382.1	2	1255	32	14558	0.775819
230	Purine metabolism	XM_021564019.1;XM_021604183.1;XM_021565283.1;XM_021564016.1;XM_021564018.1;XM_021625108.1;XM_021564021.1;XM_021599446.1;XM_021558868.1;XM_021564023.1;XM_021601663.1;XM_021561941.1;XM_021565281.1;XM_021565280.1;XM_021569313.1;XM_021589288.1;XM_021599445.1;XM_021564022.1;XM_021564017.1;XM_021564763.1;XM_021586468.1;XM_021589290.1;XM_021625107.1;XM_021558873.1	24	1255	317	14558	0.777508
410	beta-Alanine metabolism	XM_021572706.1	1	1255	17	14558	0.78421
5100	Bacterial invasion of epithelial cells	XM_021614931.1;XM_021612085.1;XM_021612084.1	3	1255	48	14558	0.794922
5033	Nicotine addiction	XM_021557129.1	1	1255	18	14558	0.802835
10	Glycolysis / Gluconeogenesis	XM_021600676.1;XM_021600666.1;XM_021564763.1;XM_021606797.1	4	1255	64	14558	0.813481
3008	Ribosome biogenesis in eukaryotes	XM_021588275.1;XM_021582318.1;XM_021612524.1;XM_021582871.1	4	1255	66	14558	0.831917
5210	Colorectal cancer	XM_021612961.1	1	1255	20	14558	0.835403
4923	Regulation of lipolysis in adipocytes	XM_021612961.1	1	1255	20	14558	0.835403
830	Retinol metabolism	XM_021620401.1;XM_021612045.1	2	1255	37	14558	0.840519
4722	Neurotrophin signaling pathway	XM_021615355.1;XM_021612961.1	2	1255	37	14558	0.840519
520	Amino sugar and nucleotide sugar metabolism	XM_021605975.1;XM_021575309.1;XM_021599959.1	3	1255	53	14558	0.84684
5142	Chagas disease (American trypanosomiasis)	XM_021612961.1	1	1255	21	14558	0.849612
450	Selenocompound metabolism	XM_021564763.1	1	1255	21	14558	0.849612
512	Mucin type O-glycan biosynthesis	XM_021572672.1;XM_021572671.1	2	1255	38	14558	0.851231
240	Pyrimidine metabolism	XM_021625108.1;XM_021565280.1;XM_021558873.1;XM_021586028.1;XM_021625107.1;XM_021558868.1;XM_021567265.1;XM_021612045.1;XM_021565281.1;XM_021565283.1	10	1255	152	14558	0.85395
5206	MicroRNAs in cancer	XM_021576561.1;XM_021620394.1;XM_021608713.1;XM_021620397.1;XM_021584046.1;XM_021583038.1;XM_021620395.1;XM_021620396.1;XM_021576560.1	9	1255	139	14558	0.856746
4012	ErbB signaling pathway	XM_021606402.1;XM_021612554.1;XM_021563295.1;XM_021619439.1;XM_021612552.1;XM_021621076.1;XM_021619438.1;XM_021612961.1;XM_021564663.1;XM_021598370.1;XM_021563293.1;XM_021567942.1;XM_021563294.1;XM_021625781.1;XM_021619164.1;XM_021619163.1;XM_021564664.1	17	1255	246	14558	0.861132
4662	B cell receptor signaling pathway	XM_021612961.1;XM_021607333.1	2	1255	39	14558	0.861283
4350	TGF-beta signaling pathway	XM_021564888.1;XM_021611037.1;XM_021597328.1;XM_021564889.1;XM_021605214.1;XM_021571664.1;XM_021611038.1;XM_021587309.1;XM_021614163.1;XM_021609267.1;XM_021571663.1;XM_021611036.1;XM_021597329.1;XM_021619163.1;XM_021619164.1	15	1255	220	14558	0.86185
4062	Chemokine signaling pathway	XM_021582057.1;XM_021614931.1;XM_021612961.1	3	1255	55	14558	0.864175
4145	Phagosome	XM_021606143.1;XM_021591579.1;XM_021556946.1;XM_021593316.1;XM_021593310.1;XM_021567804.1;XM_021597154.1;XM_021617407.1;XM_021617406.1;XM_021597414.1;XM_021606142.1;XM_021606141.1;XM_021556949.1;XM_021556945.1;XM_021556948.1;XM_021567803.1;XM_021625884.1;XM_021556947.1;XM_021606140.1	19	1255	273	14558	0.865151
5221	Acute myeloid leukemia	XM_021612961.1	1	1255	23	14558	0.874458
3050	Proteasome	XM_021576407.1	1	1255	24	14558	0.885298
4744	Phototransduction	XM_021616258.1;XM_021616260.1	2	1255	43	14558	0.895558
4330	Notch signaling pathway	XM_021621347.1;XM_021621179.1;XM_021597244.1;XM_021597246.1;XM_021621178.1;XM_021580539.1;XM_021603934.1;XM_021564574.1;XM_021605800.1;XM_021624829.1;XM_021580540.1;XM_021611554.1;XM_021582385.1;XM_021611524.1	14	1255	217	14558	0.902124
30	Pentose phosphate pathway	XM_021570948.1;XM_021570947.1	2	1255	44	14558	0.902802
4151	PI3K-Akt signaling pathway	XM_021569213.1;XM_021613493.1;XM_021612961.1;XM_021609985.1;XM_021615467.1;XM_021569212.1	6	1255	106	14558	0.903633
4664	Fc epsilon RI signaling pathway	XM_021612961.1	1	1255	26	14558	0.904252
5160	Hepatitis C	XM_021612961.1	1	1255	26	14558	0.904252
5200	Pathways in cancer	XM_021616770.1;XM_021590794.1;XM_021612961.1;XM_021616645.1;XM_021582359.1;XM_021615467.1;XM_021569213.1;XM_021623560.1;XM_021616644.1;XM_021609985.1;XM_021563733.1;XM_021569212.1;XM_021616646.1;XM_021578539.1;XM_021616648.1;XM_021616643.1	16	1255	246	14558	0.908911
4380	Osteoclast differentiation	XM_021612961.1	1	1255	27	14558	0.912521
5218	Melanoma	XM_021612961.1	1	1255	27	14558	0.912521
5034	Alcoholism	XM_021565167.1;XM_021566308.1;XM_021565168.1	3	1255	63	14558	0.917381
5212	Pancreatic cancer	XM_021612961.1	1	1255	29	14558	0.92698
4742	Taste transduction	XM_021619448.1;XM_021557129.1;XM_021619449.1	3	1255	65	14558	0.927309
4611	Platelet activation	XM_021572818.1;XM_021612961.1;XM_021583930.1	3	1255	67	14558	0.936132
4976	Bile secretion	XM_021586020.1;XM_021586019.1;XM_021611423.1	3	1255	68	14558	0.940162
4550	Signaling pathways regulating pluripotency of stem cells	XM_021600136.1;XM_021588931.1;XM_021585099.1;XM_021620872.1;XM_021613938.1;XM_021588930.1;XM_021569886.1;XM_021625868.1;XM_021574968.1;XM_021563354.1;XM_021565658.1;XM_021612961.1;XM_021584788.1	13	1255	217	14558	0.941174
4150	mTOR signaling pathway	XM_021578010.1;XM_021619163.1;XM_021587184.1;XM_021587678.1;XM_021587185.1;XM_021578346.1;XM_021606451.1;XM_021619164.1;XM_021612961.1;XM_021606452.1;XM_021587182.1;XM_021587183.1;XM_021606450.1	13	1255	218	14558	0.943436
5321	Inflammatory bowel disease (IBD)	XM_021600627.1	1	1255	32	14558	0.944316
4014	Ras signaling pathway	XM_021612961.1;XM_021610695.1;XM_021584285.1;XM_021584286.1;XM_021602471.1;XM_021558580.1;XM_021618431.1;XM_021558581.1;XM_021610686.1;XM_021618434.1;XM_021618433.1;XM_021618432.1	12	1255	205	14558	0.94581
3440	Homologous recombination	XM_021558276.1	1	1255	33	14558	0.949127
4340	Hedgehog signaling pathway	XM_021564888.1;XM_021606656.1;XM_021619964.1;XM_021600889.1;XM_021606648.1;XM_021564889.1	6	1255	119	14558	0.950276
620	Pyruvate metabolism	XM_021600666.1;XM_021600676.1	2	1255	54	14558	0.953428
190	Oxidative phosphorylation	XM_021564078.1;XM_021587076.1	2	1255	54	14558	0.953428
650	Butanoate metabolism	XM_021602083.1	1	1255	34	14558	0.953522
4620	Toll-like receptor signaling pathway	XM_021567942.1;XM_021578195.1;XM_021564663.1;XM_021578194.1;XM_021583790.1;XM_021612961.1;XM_021583791.1;XM_021598370.1;XM_021564664.1	9	1255	170	14558	0.96259
5322	Systemic lupus erythematosus	XM_021565167.1;XM_021565168.1	2	1255	57	14558	0.962846
3020	RNA polymerase	XM_021625108.1;XM_021625107.1	2	1255	58	14558	0.965556
4072	Phospholipase D signaling pathway	XM_021612961.1	1	1255	38	14558	0.967623
5223	Non-small cell lung cancer	XM_021616770.1;XM_021612961.1	2	1255	62	14558	0.974616
4725	Cholinergic synapse	XM_021612961.1	1	1255	41	14558	0.975314
3022	Basal transcription factors	XM_021600827.1;XM_021604891.1	2	1255	63	14558	0.976492
4930	Type II diabetes mellitus	XM_021624562.1;XM_021624561.1	2	1255	64	14558	0.978234
1200	Carbon metabolism	XM_021580360.1;XM_021602083.1;XM_021570947.1;XM_021580359.1;XM_021581214.1;XM_021606797.1;XM_021607080.1;XM_021570948.1;XM_021587076.1	9	1255	182	14558	0.979111
4022	cGMP-PKG signaling pathway	XM_021607333.1;XM_021612961.1	2	1255	66	14558	0.981351
4610	Complement and coagulation cascades	XM_021621661.1;XM_021577867.1	2	1255	68	14558	0.984032
4310	Wnt signaling pathway	XM_021623449.1;XM_021623448.1;XM_021616775.1;XM_021589068.1;XM_021571176.1;XM_021625781.1;XM_021571175.1;XM_021579351.1;XM_021571177.1;XM_021609267.1;XM_021579350.1;XM_021611524.1;XM_021616774.1;XM_021618159.1;XM_021611554.1;XM_021571174.1;XM_021589067.1;XM_021568198.1;XM_021623447.1;XM_021597746.1;XM_021607333.1;XM_021605214.1;XM_021606797.1	23	1255	393	14558	0.98492
4666	Fc gamma R-mediated phagocytosis	XM_021612607.1;XM_021612961.1	2	1255	69	14558	0.985229
330	Arginine and proline metabolism	XM_021572706.1	1	1255	48	14558	0.986893
5032	Morphine addiction	XM_021557129.1	1	1255	48	14558	0.986893
280	Valine, leucine and isoleucine degradation	XM_021602083.1	1	1255	48	14558	0.986893
532	Glycosaminoglycan biosynthesis - chondroitin sulfate / dermatan sulfate	XM_021577289.1	1	1255	50	14558	0.989062
500	Starch and sucrose metabolism	XM_021608906.1	1	1255	51	14558	0.990008
533	Glycosaminoglycan biosynthesis - keratan sulfate	XM_021566970.1	1	1255	53	14558	0.991662
51	Fructose and mannose metabolism	XM_021620731.1	1	1255	53	14558	0.991662
4740	Olfactory transduction	XM_021576997.1;XM_021576996.1	2	1255	80	14558	0.993791
2010	ABC transporters	XM_021589691.1	1	1255	57	14558	0.994195
4727	GABAergic synapse	XM_021563354.1;XM_021557129.1	2	1255	81	14558	0.994266
3010	Ribosome	XM_021616801.1	1	1255	58	14558	0.994697
1230	Biosynthesis of amino acids	XM_021607080.1;XM_021581214.1;XM_021606797.1	3	1255	103	14558	0.994781
600	Sphingolipid metabolism	XM_021573379.1;XM_021619034.1	2	1255	84	14558	0.995488
510	N-Glycan biosynthesis	XM_021605064.1;XM_021600782.1;XM_021566970.1	3	1255	106	14558	0.995812
5205	Proteoglycans in cancer	XM_021610366.1;XM_021612961.1;XM_021576560.1;XM_021576561.1	4	1255	127	14558	0.996228
4726	Serotonergic synapse	XM_021582096.1	1	1255	65	14558	0.997187
4723	Retrograde endocannabinoid signaling	XM_021557129.1	1	1255	68	14558	0.997856
4080	Neuroactive ligand-receptor interaction	XM_021560243.1;XM_021560242.1;XM_021563010.1;XM_021583294.1;XM_021560235.1;XM_021625338.1;XM_021560240.1;XM_021560232.1;XM_021560236.1;XM_021563009.1;XM_021560239.1;XM_021560238.1;XM_021614592.1;XM_021614587.1;XM_021614588.1;XM_021560233.1;XM_021614589.1;XM_021560231.1;XM_021583296.1;XM_021557129.1;XM_021560234.1;XM_021583295.1;XM_021560241.1;XM_021614595.1;XM_021614594.1;XM_021614591.1	26	1255	488	14558	0.998045
630	Glyoxylate and dicarboxylate metabolism	XM_021581214.1	1	1255	70	14558	0.998211
4921	Oxytocin signaling pathway	XM_021607333.1	1	1255	71	14558	0.998366
4724	Glutamatergic synapse	XM_021605190.1	1	1255	74	14558	0.998755
4370	VEGF signaling pathway	XM_021571969.1;XM_021571966.1;XM_021571968.1;XM_021571967.1;XM_021612961.1;XM_021598370.1	6	1255	185	14558	0.999049
4024	cAMP signaling pathway	XM_021612961.1	1	1255	79	14558	0.999209
561	Glycerolipid metabolism	XM_021583794.1;XM_021585853.1	2	1255	106	14558	0.999244
5169	Epstein-Barr virus infection	XM_021612961.1	1	1255	82	14558	0.999397
590	Arachidonic acid metabolism	XM_021573379.1	1	1255	82	14558	0.999397
4260	Cardiac muscle contraction	XM_021564078.1;XM_021566906.1	2	1255	115	14558	0.99964
4728	Dopaminergic synapse	XM_021612961.1	1	1255	88	14558	0.99965
4060	Cytokine-cytokine receptor interaction	XM_021622524.1;XM_021571663.1;XM_021565605.1;XM_021597329.1;XM_021597328.1;XM_021565608.1;XM_021565606.1;XM_021571664.1	8	1255	243	14558	0.999759
4360	Axon guidance	XM_021593868.1;XM_021569198.1;XM_021607333.1;XM_021564981.1;XM_021562294.1;XM_021593864.1;XM_021569197.1;XM_021569195.1;XM_021590309.1;XM_021580902.1;XM_021613130.1;XM_021609304.1	12	1255	320	14558	0.999837
5410	Hypertrophic cardiomyopathy (HCM)	XM_021604683.1;XM_021601400.1	2	1255	160	14558	0.999992
4141	Protein processing in endoplasmic reticulum	XM_021612045.1;XM_021570093.1;XM_021566203.1;XM_021583125.1;XM_021605064.1;XM_021597453.1;XM_021576137.1;XM_021570086.1;XM_021602255.1;XM_021566201.1;XM_021625781.1;XM_021567942.1;XM_021566202.1;XM_021597400.1	14	1255	407	14558	0.999993
5414	Dilated cardiomyopathy (DCM)	XM_021601400.1;XM_021604683.1	2	1255	162	14558	0.999993
4530	Tight junction	XM_021584963.1;XM_021571969.1;XM_021573877.1;XM_021572103.1;XM_021571968.1;XM_021609267.1;XM_021573878.1;XM_021573770.1;XM_021572102.1;XM_021571967.1;XM_021612961.1;XM_021573880.1;XM_021571966.1;XM_021578398.1;XM_021573876.1;XM_021584964.1;XM_021584962.1;XM_021587309.1	18	1255	488	14558	0.999996
4540	Gap junction	XM_021601162.1;XM_021608777.1;XM_021598370.1;XM_021621076.1	4	1255	223	14558	0.999997
4261	Adrenergic signaling in cardiomyocytes	XM_021599687.1;XM_021601976.1;XM_021601978.1;XM_021601977.1;XM_021587309.1;XM_021599691.1;XM_021599689.1;XM_021599690.1;XM_021599688.1;XM_021612961.1	10	1255	348	14558	0.999997
4950	Maturity onset diabetes of the young	XM_021625868.1	1	1255	149	14558	0.999999
4514	Cell adhesion molecules (CAMs)	XM_021588974.1;XM_021588089.1;XM_021586062.1;XM_021623775.1;XM_021588091.1;XM_021623773.1;XM_021596648.1;XM_021596646.1;XM_021596643.1;XM_021623774.1;XM_021604519.1;XM_021588090.1;XM_021623772.1;XM_021609673.1;XM_021604503.1;XM_021577234.1;XM_021604512.1;XM_021596650.1;XM_021586063.1;XM_021596649.1;XM_021596647.1	21	1255	559	14558	0.999999
4916	Melanogenesis	XM_021598370.1	1	1255	172	14558	1
601	Glycosphingolipid biosynthesis - lacto and neolacto series	XM_021566970.1	1	1255	193	14558	1
4020	Calcium signaling pathway	XM_021601162.1;XM_021579174.1;XM_021565403.1;XM_021620007.1;XM_021579175.1	5	1255	381	14558	1
